# Supplementary material for: Synthesis of cationic π-extended imidazolium salts by sequential Cu-catalyzed arylation/annulation and photocyclization
Source: Royal Society of Chemistry journal article supplement (doi:10.1039/d1cc06194a), 2021-12-07

## *Supporting Information*

### **Synthesis of cationic $\pi$ -extended imidazolium salts by sequential Cu-catalyzed arylation/annulation and photocyclization**

Tianbao Wang, Qinze Zheng, Linhua Wang, Zhenmei Huang, Huaxing Zhang, Yuming Zhang, Cheng Zhang and Ge Gao\*

*Key Laboratory of Green Chemistry and Technology of Ministry of Education, College of Chemistry, Sichuan University, 29 Wangjiang Road, Chengdu 610064, P. R. China*

\*E-mail: gg2b@scu.edu.cn

#### **Table of Contents**

|                                                                            |     |
|----------------------------------------------------------------------------|-----|
| I. General Remarks.....                                                    | S1  |
| II. Optimization of Reaction Conditions and General Procedures.....        | S1  |
| III. Characterization of <b>3</b> , <b>4</b> , <b>5</b> and <b>6</b> ..... | S4  |
| IV. DFT Calculations.....                                                  | S24 |
| V. Single Crystal X-ray Crystallographic Data.....                         | S28 |
| VI. Optical Properties of Selected Compounds.....                          | S31 |
| VII. References.....                                                       | S32 |
| VIII. Copies of <sup>1</sup> H and <sup>13</sup> C NMR Spectra.....        | S33 |

## I. General Remarks

All commercially available reagents were used without further purification unless otherwise noted. DMF was dried through a solvent purification system from Innovative Technology. Cu<sub>2</sub>O (99% purity) was purchased from Shanghai Aladdin Biochemical Technology Co., Ltd. MeOH (AR) and MeCN (AR) were purchased from Chengdu Kelong Chemical Engineering Reagent (China) CO., Ltd. Analytical thin layer chromatography was performed on HG/T2354-92 GF254 plates (Qingdao Haiyang Chemical Co., Ltd.). The 1-arylimidazoles<sup>1</sup>, 1,2,3-triaryl imidazolium salts<sup>2</sup> and cyclic diaryliodonium salts<sup>3</sup> were prepared according to the literature procedures.

NMR spectroscopy were obtained on a Agilent 400-MR DD2 spectrometer. The <sup>1</sup>H NMR (400 MHz) chemical shifts were recorded relative to CDCl<sub>3</sub> or DMSO-*d*<sub>6</sub> as the internal reference (CDCl<sub>3</sub>:  $\delta = 7.26$  ppm; DMSO-*d*<sub>6</sub>:  $\delta = 2.50$  ppm). The <sup>13</sup>C NMR (100 MHz) chemical shifts were given using CDCl<sub>3</sub> or DMSO-*d*<sub>6</sub> as the internal standard (CDCl<sub>3</sub>:  $\delta = 77.16$  ppm; DMSO-*d*<sub>6</sub>:  $\delta = 39.52$  ppm). High resolution mass spectra (HR-MS) were obtained with a Shimadzu LCMS-ITTOF (ESI). Single crystal X-Ray diffraction data were collected on an Agilent Technologies Gemini single-crystal diffractometer. Absorption spectra were obtained on a HITACHI U-2910 spectrometer. Fluorescence spectra and absolute quantum yields were collected on a Horiba Jobin Yvon-Edison Fluoromax-4 fluorescence spectrometer with a calibrated integrating sphere system. Photocyclization reactions were performed with a Rayonet reactor (RPR-200) with 254 nm (168 W) lamps in quartz flasks.

## II. Optimization of Reaction Conditions and General Procedures

### a) Screening of reaction conditions

Table S1 Optimization for the arylation/annulation of 1a.<sup>a</sup>

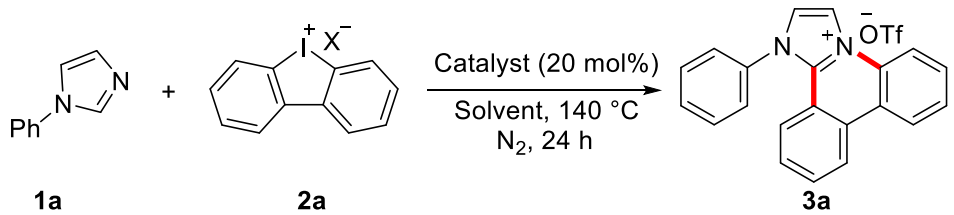

| Entry | Catalyst                               | Solvent | Base  | X <sup>-</sup>               | Yield (%) <sup>b</sup> |
|-------|----------------------------------------|---------|-------|------------------------------|------------------------|
| 1     | Cu <sub>2</sub> O                      | DMF     | --    | OTf <sup>-</sup>             | 95                     |
| 2     | Cu(OAc) <sub>2</sub> ·H <sub>2</sub> O | DMF     | --    | OTf <sup>-</sup>             | 91                     |
| 3     | Cu <sub>2</sub> O                      | DMF     | NaOAc | OTf <sup>-</sup>             | 53                     |
| 4     | Cu <sub>2</sub> O                      | DMF     | --    | BF <sub>4</sub> <sup>-</sup> | 94                     |

|   |                   |                     |    |                  |       |
|---|-------------------|---------------------|----|------------------|-------|
| 5 | Cu <sub>2</sub> O | DMF                 | -- | Cl <sup>-</sup>  | trace |
| 6 | Cu <sub>2</sub> O | Dioxane             | -- | OTf <sup>-</sup> | 94    |
| 7 | Cu <sub>2</sub> O | 1,2-Dichlorobenzene | -- | OTf <sup>-</sup> | 75    |

<sup>a</sup>1a (0.2 mmol), 2a (0.4 mmol), a catalyst (20 mol%), and a solvent (1 mL) at 140 °C, N<sub>2</sub>, 24 h;

<sup>b</sup>Isolated yield.

**Table S2 Optimization for the photocyclization of 3a.<sup>a</sup>**

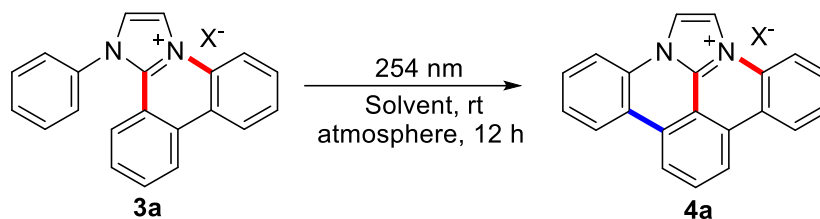

| Entry | Solvent | X <sup>-</sup>               | Atmosphere     | Yield (%) <sup>b</sup> |
|-------|---------|------------------------------|----------------|------------------------|
| 1     | MeOH    | OTf <sup>-</sup>             | air            | 70                     |
| 2     | MeOH    | BF <sub>4</sub> <sup>-</sup> | air            | 67                     |
| 3     | DMF     | OTf <sup>-</sup>             | air            | trace                  |
| 4     | MeCN    | OTf <sup>-</sup>             | air            | trace                  |
| 5     | DCM     | OTf <sup>-</sup>             | air            | 13                     |
| 6     | MeOH    | OTf <sup>-</sup>             | N <sub>2</sub> | trace                  |

<sup>a</sup>3a (30 mg) in a solvent (30 mL) under 254 nm UV-light (168 W), rt, 12 h; <sup>b</sup>Isolated yield.

### b) General procedure for the synthesis of 3

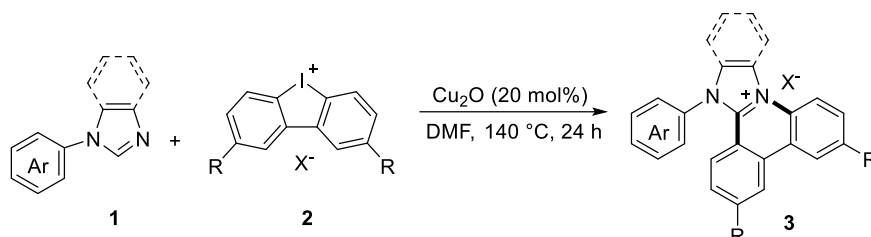

A flame-dried Schlenk tube with a magnetic stirring bar was charged with 1-arylimidazole **1** (0.2 mmol), cyclic diaryliodonium salt **2** (0.4 mmol), Cu<sub>2</sub>O (5.7 mg, 20 mol%), and DMF (1 mL) under N<sub>2</sub>. The reaction mixture was heated at 140 °C for 24 h. After reaction was complete, the reaction mixture was concentrated and the residue was purified by column chromatography on silica gel with CH<sub>2</sub>Cl<sub>2</sub>/MeOH (v/v, 40/1–25/1) to provide product **3**.

### c) General procedure for the intramolecular photocyclization reaction of 3

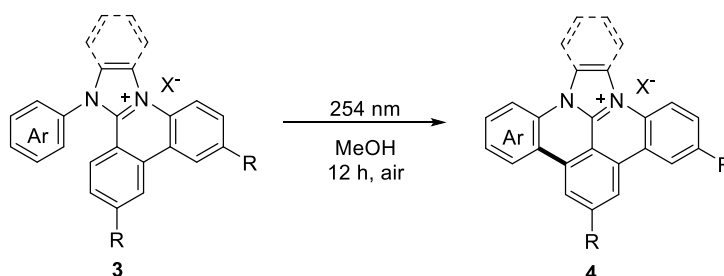

A quartz tube was charged with **3** (30 mg) and MeOH (30 mL) in air. The reaction mixture reacted at room temperature for 12 hours under the irradiation of 254 nm ultraviolet light. Then the reaction mixture was concentrated and the residue was purified by column chromatography on silica gel with CH<sub>2</sub>Cl<sub>2</sub>/MeOH (v/v, 40/1–10/1) to provide product **4**.

#### d) General procedure for the synthesis of **5**

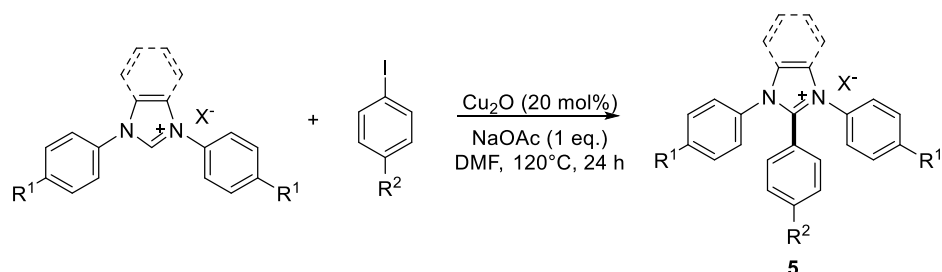

A flame-dried Schlenk tube with a magnetic stirring bar was charged with 1,3-diaryl imidazolium salt (0.2 mmol), an iodoaromatic compounds (0.4 mmol), Cu<sub>2</sub>O (5.7 mg, 20 mol%), NaOAc (16.4 mg, 0.2 mmol) and DMF (1 mL) under N<sub>2</sub>. The reaction mixture was heated at 120 °C for 24 h. After reaction was complete, the reaction mixture was concentrated and the residue was purified by column chromatography on silica gel with CH<sub>2</sub>Cl<sub>2</sub>/MeOH (v/v, 50/1–30/1) to provide product **5**.

#### e) General procedure for the intramolecular photocyclization reaction of **5**

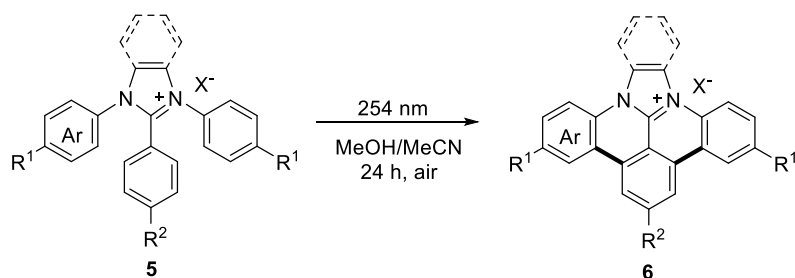

A quartz tube was charged with **5** (30 mg) and MeOH/MeCN (26 mL/4 mL) in air. The reaction mixture reacted at room temperature for 24 hours under the irradiation of 254 nm ultraviolet light. Then the reaction mixture was concentrated and the residue was purified by column chromatography on silica gel with CH<sub>2</sub>Cl<sub>2</sub>/MeOH (v/v, 40/1–10/1) to provide product **6**.

#### f) Synthesis of **4x**

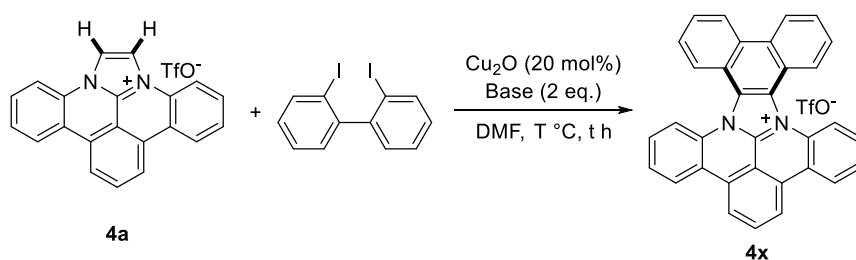

A flame-dried Schlenk tube with a magnetic stirring bar was charged with **4a** (44.2 mg, 0.1 mmol), 2,2'-diiodo-1,1'-biphenyl (81.2 mg, 0.2 mmol), Cu<sub>2</sub>O (2.8 mg, 20 mol%), KOAc (39.2 mg, 0.2 mmol) and DMF (1 mL) under N<sub>2</sub>. The reaction mixture was heated at 120 °C for 24 h. After reaction was complete, the reaction mixture was concentrated and the residue was purified by column chromatography on silica gel with CH<sub>2</sub>Cl<sub>2</sub>/MeOH (v/v, 50/1–25/1) to provide product **4x** as a light yellow solid (30.8 mg, 52% yield). <sup>1</sup>H NMR (400 MHz, DMSO-*d*<sub>6</sub>): δ = 7.94-8.04 (m, 8H), 8.52 (t, *J* = 8.0 Hz, 1H), 8.64 (d, *J* = 7.6 Hz, 4H), 9.11-9.18 (m, 6H) ppm. <sup>13</sup>C NMR (100 MHz, DMSO-*d*<sub>6</sub>): δ = 112.1, 120.0, 120.9, 122.5, 123.0, 123.8, 125.2, 126.1, 126.3, 127.7, 128.6, 128.9, 129.98, 130.03, 130.1, 131.1, 134.5, 138.9 ppm. HRMS (ESI<sup>+</sup>): calcd for C<sub>28</sub>H<sub>12</sub>N<sub>5</sub><sup>+</sup> [M–CF<sub>3</sub>SO<sub>3</sub><sup>–</sup>]<sup>+</sup> 443.1543, found 443.1590.

### III. Characterization of 3, 4, 5 and 6

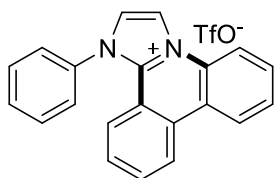

**1-phenyl-1H-imidazo[1,2-*f*]phenanthridin-4-ium trifluoromethanesulfonate (3a):** A white solid (84.4 mg, 95% yield). <sup>1</sup>H NMR (400 MHz, DMSO-*d*<sub>6</sub>): δ = 7.26 (d, *J* = 8.4 Hz, 1H), 7.61 (t, *J* = 8.0 Hz, 1H), 7.82-8.00 (m, 7H), 8.03-8.07 (m, 1H), 8.59 (d, *J* = 2.0 Hz, 1H), 8.76 (d, *J* = 8.0 Hz, 1H), 9.00 (d, *J* = 8.4 Hz, 2H), 9.42 (d, *J* = 2.4 Hz, 1H) ppm. <sup>13</sup>C NMR (100 MHz, DMSO-*d*<sub>6</sub>): δ = 115.2, 116.7, 117.4, 121.8, 123.7, 124.4, 125.0, 127.1, 127.4, 128.6, 129.1, 129.2, 130.3, 130.9, 131.1, 131.7, 132.6, 136.5, 136.7 ppm. HRMS (ESI<sup>+</sup>): calcd for C<sub>21</sub>H<sub>15</sub>N<sub>2</sub><sup>+</sup> [M–CF<sub>3</sub>SO<sub>3</sub><sup>–</sup>]<sup>+</sup> 295.1230, found 295.1225.

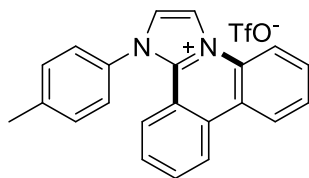

**1-(*p*-tolyl)-1H-imidazo[1,2-*f*]phenanthridin-4-ium trifluoromethanesulfonate (3b):** A white solid (86 mg, 94% yield). <sup>1</sup>H NMR (400 MHz, DMSO-*d*<sub>6</sub>): δ = 9.40 (d, *J* = 2.0 Hz, 1H), 8.99 (d, *J* = 7.6 Hz, 2H), 8.75 (d, *J* = 8.4 Hz, 1H), 8.53 (d, *J* = 1.6 Hz, 1H), 7.90-8.06 (m, 3H), 7.73 (d, *J* = 8 Hz, 2H), 7.63 (d, *J* = 7.2 Hz, 3H), 7.34 (d, *J* = 8.4 Hz, 1H), 2.54 (s, 3H) ppm. <sup>13</sup>C NMR (100 MHz, DMSO-*d*<sub>6</sub>): δ = 21.0, 115.1, 116.8, 117.4, 121.8, 123.8, 124.4, 125.0, 126.8, 127.6, 128.6, 129.1, 129.3, 130.2, 131.1, 131.3, 132.5, 134.1, 136.7, 141.6 ppm. HRMS (ESI<sup>+</sup>): calcd for C<sub>22</sub>H<sub>17</sub>N<sub>2</sub><sup>+</sup> [M–CF<sub>3</sub>SO<sub>3</sub><sup>–</sup>]<sup>+</sup> 309.1386, found 309.1357.

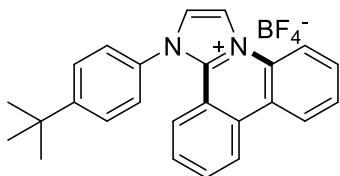

**1-(4-(*tert*-butyl)phenyl)-1*H*-imidazo[1,2-*f*]phenanthridin-4-ium tetrafluoroborate (3c):** A white solid (73.6 mg, 84% yield).  $^1\text{H}$  NMR (400 MHz,  $\text{DMSO-}d_6$ ):  $\delta$  = 1.43 (s, 9H), 7.29 (d,  $J$  = 8.0 Hz, 1H), 7.60 (t,  $J$  = 8.0 Hz, 1H), 7.77 (d,  $J$  = 8.8 Hz, 2H), 7.85 (d,  $J$  = 8.4 Hz, 2H), 7.93 (t,  $J$  = 8.0 Hz, 1H), 7.98 (t,  $J$  = 7.2 Hz, 1H), 8.04 (t,  $J$  = 8.0 Hz, 1H), 8.57 (d,  $J$  = 2.4 Hz, 1H), 8.75 (d,  $J$  = 8.0 Hz, 1H), 8.99 (d,  $J$  = 8.4 Hz, 2H), 9.40 (d,  $J$  = 2.4 Hz, 1H) ppm.  $^{13}\text{C}$  NMR (100 MHz,  $\text{DMSO-}d_6$ ):  $\delta$  = 31.0, 35.0, 115.1, 116.7, 117.3, 121.8, 123.7, 124.4, 124.9, 126.5, 127.5, 127.6, 128.6, 129.1, 129.2, 130.2, 131.0, 132.5, 134.0, 136.7, 154.5 ppm. HRMS ( $\text{ESI}^+$ ): calcd for  $\text{C}_{25}\text{H}_{23}\text{N}_2[\text{M}-\text{BF}_4^-]^+$  351.1856, found 351.1852.

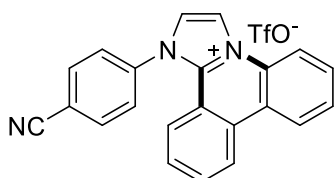

**1-(4-cyanophenyl)-1*H*-imidazo[1,2-*f*]phenanthridin-4-ium trifluoromethanesulfonate (3d):** A white solid (88.5 mg, 94% yield).  $^1\text{H}$  NMR (400 MHz,  $\text{DMSO-}d_6$ ):  $\delta$  = 7.31 (d,  $J$  = 8.0 Hz, 1H), 7.66 (t,  $J$  = 7.6 Hz, 1H), 7.95 (t,  $J$  = 7.6 Hz, 1H), 8.00-8.11 (m, 4H), 8.34-8.38 (m, 2H), 8.61 (d,  $J$  = 2.4 Hz, 1H), 8.77 (d,  $J$  = 8.0 Hz, 1H), 9.02 (dd,  $J$  = 3.6 Hz,  $J$  = 8.4 Hz, 2H), 9.46 (d,  $J$  = 2.4 Hz, 1H) ppm.  $^{13}\text{C}$  NMR (100 MHz,  $\text{DMSO-}d_6$ ):  $\delta$  = 114.5, 115.5, 116.4, 117.4, 117.9, 121.9, 124.1, 124.5, 125.0, 127.2, 128.4, 128.8, 129.1, 129.5, 130.3, 131.2, 132.8, 135.1, 136.9, 140.1 ppm. HRMS ( $\text{ESI}^+$ ): calcd for  $\text{C}_{22}\text{H}_{14}\text{N}_3[\text{M}-\text{CF}_3\text{SO}_3^-]^+$  320.1182, found 320.1178.

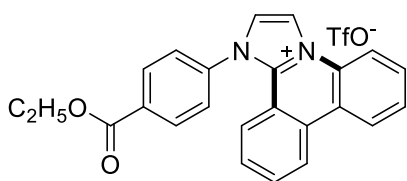

**1-(4-(ethoxycarbonyl)phenyl)-1*H*-imidazo[1,2-*f*]phenanthridin-4-ium trifluoromethanesulfonate (3e):** A white solid (92.5 mg, 90% yield).  $^1\text{H}$  NMR (400 MHz,  $\text{DMSO-}d_6$ ):  $\delta$  = 1.40 (t,  $J$  = 6.8 Hz, 3H), 4.44 (q,  $J$  = 6.8 Hz, 2H), 7.30 (d,  $J$  = 8.4 Hz, 1H), 7.63 (t,  $J$  = 7.6 Hz, 1H), 7.91-8.07 (m, 5H), 8.39 (d,  $J$  = 8.0 Hz, 2H), 8.61 (d,  $J$  = 2.4 Hz, 1H), 8.75 (d,  $J$  = 8.4 Hz, 1H), 8.99 (dd, 2H,  $J$  = 3.6 Hz,  $J$  = 8.4 Hz), 9.44 (d,  $J$  = 2.8 Hz, 1H) ppm.  $^{13}\text{C}$  NMR (100 MHz,  $\text{DMSO-}d_6$ ):  $\delta$  = 14.1, 61.5, 115.4, 116.5, 117.4, 121.8, 123.9, 124.4, 124.9, 127.1, 127.7, 128.6, 129.1, 129.3, 130.2, 131.1, 131.6, 132.6, 132.6, 136.8, 140.1, 164.7 ppm. HRMS ( $\text{ESI}^+$ ): calcd for  $\text{C}_{24}\text{H}_{19}\text{N}_2\text{O}_2[\text{M}-\text{CF}_3\text{SO}_3^-]^+$  367.1441, found 367.1440.

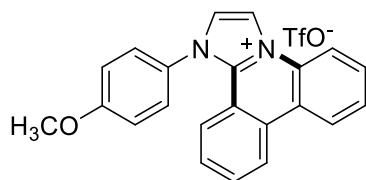

**1-(4-methoxyphenyl)-1H-imidazo[1,2-*f*]phenanthridin-4-ium trifluoromethanesulfonate (3f):** A white solid (87.2 mg, 92% yield).  $^1\text{H}$  NMR (400 MHz,  $\text{DMSO-}d_6$ ):  $\delta = 3.94$  (s, 3H), 7.34-7.38 (m, 3H), 7.65 (t,  $J = 7.6$  Hz, 1H), 7.76-7.78 (m, 2H), 7.92 (t,  $J = 7.6$  Hz, 1H), 7.96-8.06 (m, 2H), 8.51 (d,  $J = 2.0$  Hz, 1H), 8.75 (d,  $J = 8.8$  Hz, 1H), 8.98-9.00 (m, 2H), 9.38 (d,  $J = 2.0$  Hz, 1H) ppm.  $^{13}\text{C}$  NMR (100 MHz,  $\text{DMSO-}d_6$ ):  $\delta = 55.9, 115.0, 115.9, 116.8, 117.3, 119.1, 121.8, 122.3, 123.8, 124.4, 124.9, 127.8, 128.4, 128.6, 129.0, 129.2, 129.2, 130.2, 131.1, 132.5, 136.9, 161.1$  ppm. HRMS ( $\text{ESI}^+$ ): calcd for  $\text{C}_{22}\text{H}_{17}\text{N}_2\text{O} [\text{M}-\text{CF}_3\text{SO}_3^-]^+$  325.1335, found 325.1334.

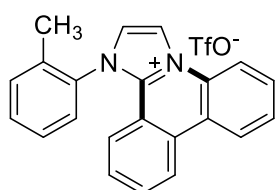

**1-(*o*-tolyl)-1H-imidazo[1,2-*f*]phenanthridin-4-ium trifluoromethanesulfonate (3g):** A white solid (89.8 mg, 98% yield).  $^1\text{H}$  NMR (400 MHz,  $\text{DMSO-}d_6$ ):  $\delta = 2.17$  (s, 3H), 7.16 (d,  $J = 8.4$  Hz, 1H), 7.59-7.65 (m, 2H), 7.72-7.79 (m, 3H), 7.92-8.08 (m, 3H), 8.56 (d,  $J = 2.0$  Hz, 1H), 8.78 (d,  $J = 8.8$  Hz, 1H), 9.01 (d,  $J = 8.4$  Hz, 2H), 9.48 (d,  $J = 2.4$  Hz, 1H) ppm.  $^{13}\text{C}$  NMR (100 MHz,  $\text{DMSO-}d_6$ ):  $\delta = 16.8, 115.8, 116.7, 117.4, 121.9, 122.9, 124.5, 124.9, 126.7, 127.6, 128.4, 128.6, 129.45, 129.48, 130.4, 131.0, 131.9, 132.2, 132.7, 135.1, 135.4, 136.3$  ppm. HRMS ( $\text{ESI}^+$ ): calcd for  $\text{C}_{22}\text{H}_{17}\text{N}_2 [\text{M}-\text{CF}_3\text{SO}_3^-]^+$  309.1386, found 309.1386.

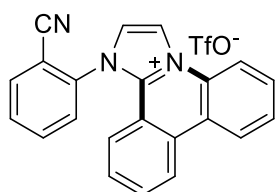

**1-(3-cyanophenyl)-1H-imidazo[1,2-*f*]phenanthridin-4-ium trifluoromethanesulfonate (3h):** A white solid (91.0 mg, 97% yield).  $^1\text{H}$  NMR (400 MHz,  $\text{DMSO-}d_6$ ):  $\delta = 7.30$  (d,  $J = 8.4$  Hz, 1H), 7.66 (t,  $J = 7.6$  Hz, 1H), 7.95 (t,  $J = 7.6$  Hz, 1H), 8.00-8.08 (m, 3H), 8.21-8.24 (m, 1H), 8.37 (d,  $J = 7.6$  Hz, 1H), 8.46 (s, 1H), 8.60 (d,  $J = 2.0$  Hz, 1H), 8.76 (d,  $J = 8.4$  Hz, 1H), 9.02 (d,  $J = 8.4$  Hz, 2H), 9.45 (d,  $J = 2.4$  Hz, 1H) ppm.  $^{13}\text{C}$  NMR (100 MHz,  $\text{DMSO-}d_6$ ):  $\delta = 113.6, 115.4, 116.4, 117.4, 117.5, 121.9, 124.1, 124.5, 125.0, 127.4, 128.8, 129.0, 129.5, 130.3, 131.0, 131.2, 132.3, 132.8, 135.5, 137.0, 137.1$  ppm. HRMS ( $\text{ESI}^+$ ): calcd for  $\text{C}_{22}\text{H}_{14}\text{N}_3 [\text{M}-\text{CF}_3\text{SO}_3^-]^+$  320.1182, found 320.1182.

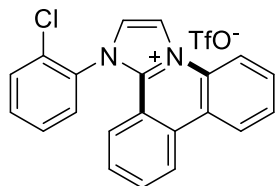

**1-(2-chlorophenyl)-1H-imidazo[1,2-f]phenanthridin-4-ium trifluoromethanesulfonate (3i):** A white solid (92.7 mg, 97% yield).  $^1\text{H}$  NMR (400 MHz,  $\text{DMSO-}d_6$ ):  $\delta = 7.20$  (d,  $J = 8.4$  Hz, 1H), 7.69 (t,  $J = 7.6$  Hz, 1H), 7.84 (t,  $J = 7.6$  Hz, 1H), 7.91-7.98 (m, 2H), 8.01-8.09 (m, 4H), 8.68 (d,  $J = 2.0$  Hz, 1H), 8.79 (d,  $J = 8.4$  Hz, 1H), 9.02-9.05 (m, 2H), 9.54 (d,  $J = 2.4$  Hz, 1H) ppm.  $^{13}\text{C}$  NMR (100 MHz,  $\text{DMSO-}d_6$ ):  $\delta = 116.1, 116.2, 117.6, 121.9, 122.8, 124.7, 125.0, 127.1, 128.9, 129.2, 129.7, 129.9, 130.0, 130.5, 130.6, 131.3, 131.4, 133.2, 133.6, 133.8, 136.6$  ppm. HRMS ( $\text{ESI}^+$ ): calcd for  $\text{C}_{21}\text{H}_{14}\text{ClN}_2[\text{M}-\text{CF}_3\text{SO}_3^-]^+$  329.0840, found 329.0840.

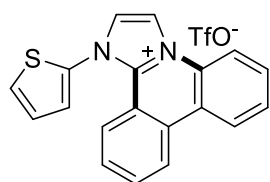

**1-(thiophen-2-yl)-1H-imidazo[1,2-f]phenanthridin-4-ium trifluoromethanesulfonate (3j):** A white solid (89.3 mg, 99% yield).  $^1\text{H}$  NMR (400 MHz,  $\text{DMSO-}d_6$ ):  $\delta = 7.39$ -7.43 (m, 2H), 7.70-7.74 (m, 2H), 7.93 (t,  $J = 7.6$  Hz, 1H), 8.01-8.06 (m, 3H), 8.64 (d,  $J = 2.4$  Hz, 1H), 8.74 (d,  $J = 8.4$  Hz, 1H), 9.00 (dd,  $J = 3.2$  Hz,  $J = 8.4$  Hz, 2H), 9.40 (d,  $J = 2.4$  Hz, 1H) ppm.  $^{13}\text{C}$  NMR (100 MHz,  $\text{DMSO-}d_6$ ):  $\delta = 115.2, 116.5, 117.4, 121.9, 123.7, 124.4, 124.9, 127.1, 128.6, 128.7, 129.0, 129.1, 129.3, 129.9, 130.5, 131.1, 132.9, 135.3, 138.0$  ppm. HRMS ( $\text{ESI}^+$ ): calcd for  $\text{C}_{19}\text{H}_{13}\text{N}_2\text{S}[\text{M}-\text{CF}_3\text{SO}_3^-]^+$  301.0794, found 301.0790.

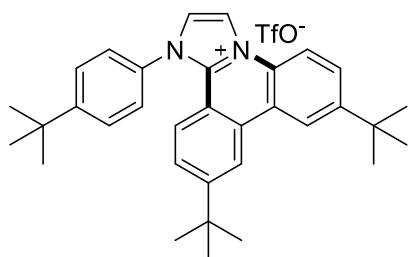

**7,10-di-tert-butyl-1-(4-(tert-butyl)phenyl)-1H-imidazo[1,2-f]phenanthridin-4-ium trifluoromethanesulfonate (3k):** A white solid (67.7 mg, 55% yield).  $^1\text{H}$  NMR (400 MHz,  $\text{DMSO-}d_6$ ):  $\delta = 1.429$ -1.433 (m, 18H), 1.52 (s, 9H), 7.26 (d,  $J = 8.8$  Hz, 1H), 7.69 (d,  $J = 8.8$  Hz, 1H), 7.76 (d,  $J = 8.8$  Hz, 2H), 7.84 (d,  $J = 8.4$  Hz, 2H), 8.09 (d,  $J = 9.2$  Hz, 1H), 8.51 (d,  $J = 2.0$  Hz, 1H), 8.66 (d,  $J = 8.8$  Hz, 1H), 8.80 (s, 2H), 9.36 (d,  $J = 2.0$  Hz, 1H) ppm.  $^{13}\text{C}$  NMR (100 MHz,  $\text{DMSO-}d_6$ ):  $\delta = 30.7, 31.1, 31.1, 35.0, 35.3, 35.6, 114.5, 114.8, 117.2, 120.0, 120.5, 121.4, 123.7, 126.6, 127.1, 127.3, 127.4, 127.6, 128.7, 130.2, 134.0, 136.5, 151.2, 154.4, 155.7$  ppm. HRMS ( $\text{ESI}^+$ ): calcd for  $\text{C}_{33}\text{H}_{39}\text{N}_2$



$[M-CF_3SO_3^-]^+$  463.3108, found 463.3109.

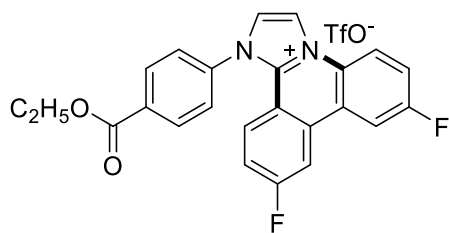

**1-(4-(ethoxycarbonyl)phenyl)-7,10-difluoro-1H-imidazo[1,2-f]phenanthridin-4-ium**

**trifluoromethanesulfonate (3l):** A white solid (59.0 mg, 53% yield).  $^1H$  NMR (400 MHz, DMSO- $d_6$ ):  $\delta$  = 1.40 (t,  $J$  = 7.2 Hz, 3H), 4.43 (q,  $J$  = 7.2 Hz, 2H), 7.34-7.38 (m, 1H), 7.59-7.64 (m, 1H), 7.99-8.07 (m, 3H), 8.37-8.40 (m, 2H), 8.60 (d,  $J$  = 2.4 Hz, 1H), 8.83-8.87 (m, 1H), 8.88-8.94 (m, 2H), 9.42 (d,  $J$  = 2.4 Hz, 1H) ppm.  $^{13}C$  NMR (100 MHz, DMSO- $d_6$ ):  $\delta$  = 14.1, 61.5, 111.3 (d,  $J_{CF}$  = 24.8 Hz), 111.5 (d,  $J_{CF}$  = 25.2 Hz), 113.9, 115.5, 118.6 (d,  $J_{CF}$  = 23.7 Hz), 119.9 (d,  $J_{CF}$  = 24.9 Hz), 120.2 (d,  $J_{CF}$  = 9.4 Hz), 123.6, 126.2, 127.1, 127.3 (d,  $J_{CF}$  = 9.5 Hz), 127.6, 131.7, 132.66, 132.74 (d,  $J_{CF}$  = 3.2 Hz), 132.8 (d,  $J_{CF}$  = 2.5 Hz), 136.4, 139.8, 161.3 (d,  $J_{CF}$  = 244.7 Hz), 163.9 (d,  $J_{CF}$  = 251.8 Hz), 164.7 ppm. HRMS (ESI $^+$ ): calcd for  $C_{24}H_{17}F_2N_2O_2 [M-CF_3SO_3^-]^+$  403.1253, found 403.1250.

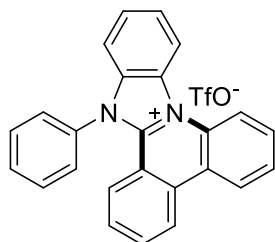

**9-phenyl-9H-benzo[4,5]imidazo[1,2-f]phenanthridin-14-ium trifluoromethanesulfonate (3m):** A yellow solid (69.1 mg, 70% yield).  $^1H$  NMR (400 MHz, DMSO- $d_6$ ):  $\delta$  = 7.45 (dd,  $J$  = 8.8 Hz,  $J$  = 3.2 Hz, 2H), 7.65 (t,  $J$  = 8.0 Hz, 1H), 7.85-8.01 (m, 8H), 8.08-8.15 (m, 2H), 9.06-9.12 (m, 2H), 9.24-9.29 (m, 2H) ppm.  $^{13}C$  NMR (100 MHz, DMSO- $d_6$ ):  $\delta$  = 113.3, 116.2, 117.0, 118.3, 119.1, 122.1, 122.3, 124.4, 125.3, 125.7, 127.3, 127.9, 128.1, 128.5, 129.2, 131.2, 131.65, 131.67, 132.1, 132.3, 134.2, 134.3, 134.8, 142.2 ppm. HRMS (ESI $^+$ ): calcd for  $C_{25}H_{17}N_2 [M-CF_3SO_3^-]^+$  345.1386, found 345.1386.

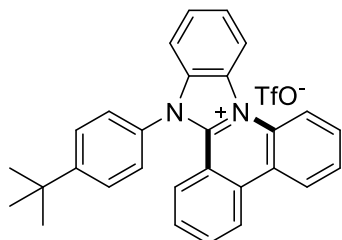

**9-(4-(tert-butyl)phenyl)-9H-benzo[4,5]imidazo[1,2-f]phenanthridin-14-ium**

**trifluoromethanesulfonate (3n):** A yellow solid (110.6 mg, 83% yield).  $^1H$  NMR (400 MHz, DMSO- $d_6$ ):  $\delta$  = 1.48 (s, 9H), 7.43-7.46 (m, 2H), 7.64 (t,  $J$  = 7.6 Hz, 1H), 7.82-7.88 (m, 3H), 7.93-8.01 (m, 4H), 8.07-8.14 (m, 2H), 9.07 (d,  $J$  = 8.4 Hz, 1H), 9.11 (d,  $J$  = 8.0 Hz, 1H), 9.23 (d,  $J$  = 8.8 Hz, 1H), 9.27 (d,  $J$  = 8.4 Hz, 1H) ppm.  $^{13}C$  NMR (100 MHz, DMSO- $d_6$ ):  $\delta$  = 31.1, 35.1, 113.4, 116.4, 117.0,

118.3, 122.1, 124.4, 125.3, 125.6, 127.3, 127.4, 127.8, 128.1, 128.4, 128.5, 129.2, 131.2, 131.6, 131.7, 132.3, 134.3, 134.9, 142.3, 154.9 ppm. HRMS (ESI<sup>+</sup>): calcd for C<sub>29</sub>H<sub>25</sub>N<sub>2</sub> [M-CF<sub>3</sub>SO<sub>3</sub><sup>-</sup>]<sup>+</sup> 401.2012, found 401.2012.

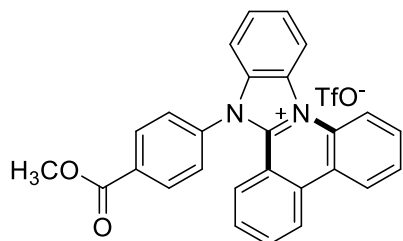

**9-(4-(methoxycarbonyl)phenyl)-9H-benzo[4,5]imidazo[1,2-f]phenanthridin-14-ium**

**trifluoromethanesulfonate (3o):** A white solid (66.3 mg, 60% yield). <sup>1</sup>H NMR (400 MHz, DMSO-*d*<sub>6</sub>): δ = 4.01 (s, 3H), 7.47-7.50 (m, 2H), 7.66-7.71 (m, 1H), 7.87 (t, *J* = 8.0 Hz, 1H), 7.94-8.03 (m, 2H), 8.07-8.16 (m, 4H), 8.49-8.51 (m, 2H), 9.09 (d, *J* = 8.4 Hz, 1H), 9.13 (d, *J* = 8.0 Hz, 1H), 9.26 (d, *J* = 8.8 Hz, 1H), 9.29 (d, *J* = 8.8 Hz, 1H) ppm. <sup>13</sup>C NMR (100 MHz, DMSO-*d*<sub>6</sub>): δ = 52.8, 113.3, 116.1, 117.1, 118.4, 122.2, 124.4, 125.3, 125.9, 127.4, 128.0, 128.2, 128.6, 129.5, 131.1, 131.8, 132.3, 132.5, 132.8, 134.5, 134.5, 138.1, 142.3, 165.3 ppm. HRMS (ESI<sup>+</sup>): calcd for C<sub>27</sub>H<sub>19</sub>N<sub>2</sub>O<sub>2</sub> [M-CF<sub>3</sub>SO<sub>3</sub><sup>-</sup>]<sup>+</sup> 403.1441, found 403.1437.

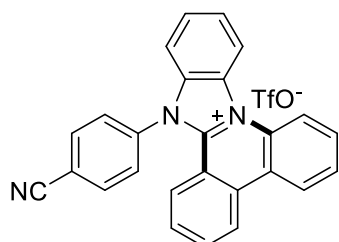

**9-(4-cyanophenyl)-9H-benzo[4,5]imidazo[1,2-f]phenanthridin-14-ium**

**trifluoromethanesulfonate (3p):** A yellow solid (56.1 mg, 54% yield). <sup>1</sup>H NMR (400 MHz, DMSO-*d*<sub>6</sub>): δ = 7.48 (d, *J* = 8.4 Hz, 1H), 7.53 (d, *J* = 8.0 Hz, 1H), 7.72 (t, *J* = 7.6 Hz, 1H), 7.88 (t, *J* = 7.6 Hz, 1H), 7.95-8.03 (m, 2H), 8.12-8.16 (m, 4H), 8.46 (d, *J* = 8.0 Hz, 2H), 9.09-9.15 (m, 2H), 9.25-9.31 (m, 2H) ppm. <sup>13</sup>C NMR (100 MHz, DMSO-*d*<sub>6</sub>): δ = 113.3, 115.0, 116.0, 117.1, 117.9, 118.4, 122.2, 124.5, 125.3, 126.0, 127.5, 127.9, 128.3, 128.7, 129.3, 129.7, 131.0, 131.8, 132.3, 134.4, 134.6, 135.9, 138.1, 142.3 ppm. HRMS (ESI<sup>+</sup>): calcd for C<sub>26</sub>H<sub>16</sub>N<sub>3</sub> [M-CF<sub>3</sub>SO<sub>3</sub><sup>-</sup>]<sup>+</sup> 370.1339, found 370.1334.

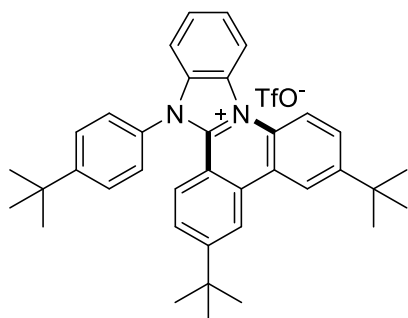

**3,6-di-tert-butyl-9-(4-(tert-butyl)phenyl)-9H-benzo[4,5]imidazo[1,2-f]phenanthridin-14-ium**

**trifluoromethanesulfonate (3q):** A yellow solid (110.0 mg, 83% yield).  $^1\text{H}$  NMR (400 MHz,  $\text{DMSO-}d_6$ ):  $\delta = 1.45$  (s, 9H), 1.48 (s, 9H), 1.55 (s, 9H), 7.40 (t,  $J = 7.2$  Hz, 2H), 7.72 (d,  $J = 8.0$  Hz, 1H), 7.80-7.85 (m, 3H), 7.89-7.96 (m, 3H), 8.12 (d,  $J = 8.4$  Hz, 1H), 8.87 (s, 1H), 8.91 (s, 1H), 9.16 (d,  $J = 7.2$  Hz, 2H) ppm.  $^{13}\text{C}$  NMR (100 MHz,  $\text{DMSO-}d_6$ ):  $\delta = 30.4, 30.8, 30.9, 34.85, 34.87, 35.6, 113.0, 113.9, 116.6, 117.9, 119.9, 120.8, 121.7, 123.3, 125.4, 126.7, 126.8, 127.0, 127.2, 127.5, 128.1, 128.2, 128.6, 129.1, 131.4, 132.0, 134.7, 141.7, 150.3, 154.6, 157.5$  ppm. HRMS ( $\text{ESI}^+$ ): calcd for  $\text{C}_{37}\text{H}_{41}\text{N}_2$   $[\text{M}-\text{CF}_3\text{SO}_3^-]^+$  513.3264, found 513.3260.

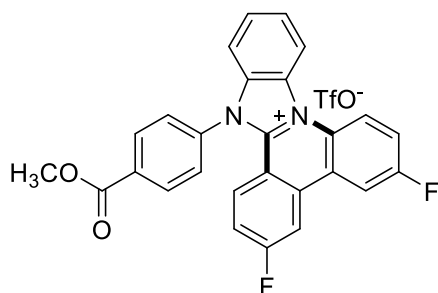

**9-(4-(ethoxycarbonyl)phenyl)-3,6-difluoro-9H-benzo[4,5]imidazo[1,2-f]phenanthridin-14-ium trifluoromethanesulfonate (3r):** A pale yellow solid (62.6 mg, 52% yield).  $^1\text{H}$  NMR (400 MHz,  $\text{DMSO-}d_6$ ):  $\delta = 4.01$  (s, 3H), 7.49-7.55 (m, 2H), 7.67 (t,  $J = 8.0$  Hz, 1H), 7.89 (t,  $J = 7.6$  Hz, 1H), 7.95-8.07 (m, 4H), 8.50 (d,  $J = 8.0$  Hz, 2H), 9.01 (t,  $J = 12.0$  Hz, 2H), 9.21 (d,  $J = 8.4$  Hz, 1H), 9.33-9.36 (m, 1H) ppm.  $^{13}\text{C}$  NMR (100 MHz,  $\text{DMSO-}d_6$ ):  $\delta = 53.8, 111.5$  (d,  $J_{\text{CF}} = 24.6$  Hz), 112.0 (d,  $J_{\text{CF}} = 25.0$  Hz), 113.4, 113.5, 116.8, 119.0 (d,  $J_{\text{CF}} = 23.8$  Hz), 120.0 (d,  $J_{\text{CF}} = 23.7$  Hz), 121.1 (d,  $J_{\text{CF}} = 9.0$  Hz), 124.05 (d,  $J_{\text{CF}} = 2.8$  Hz), 124.14 (d,  $J_{\text{CF}} = 3.3$  Hz), 127.6, 127.8, 128.0, 128.6, 128.8, 129.4 (d,  $J_{\text{CF}} = 10.2$  Hz), 132.6, 132.9, 134.4, 134.9 (d,  $J_{\text{CF}} = 12.7$  Hz), 137.8, 141.7, 160.7 (d,  $J_{\text{CF}} = 245.3$  Hz), 165.1 (d,  $J_{\text{CF}} = 254.1$  Hz), 165.3 ppm. HRMS ( $\text{ESI}^+$ ): calcd for  $\text{C}_{28}\text{H}_{19}\text{F}_2\text{N}_2\text{O}_2$   $[\text{M}-\text{CF}_3\text{SO}_3^-]^+$  439.1253, found 439.1258.

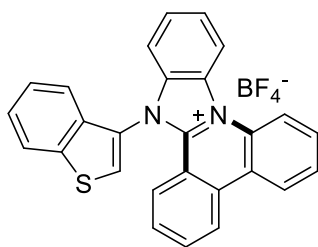

**9-(benzo[*b*]thiophen-3-yl)-9H-benzo[4,5]imidazo[1,2-*f*]phenanthridin-14-ium tetrafluoroborate (3s):** A white solid (72.2 mg, 74% yield).  $^1\text{H}$  NMR (400 MHz,  $\text{DMSO-}d_6$ ):  $\delta = 7.42$ -7.47 (m, 2H), 7.54 (d,  $J = 8.4$  Hz, 1H), 7.62 (q,  $J = 7.6$  Hz, 2H), 7.75 (d,  $J = 8.0$  Hz, 1H), 7.83 (t,  $J = 7.6$  Hz, 1H), 7.96 (t,  $J = 8.4$  Hz, 1H), 8.03 (t,  $J = 7.2$  Hz, 1H), 8.08 (t,  $J = 8.0$  Hz, 1H), 8.17 (t,  $J = 8.4$  Hz, 1H), 8.40 (d,  $J = 8.4$  Hz, 1H), 8.63 (s, 1H), 9.09-9.16 (m, 2H), 9.28-9.34 (m, 2H) ppm.  $^{13}\text{C}$  NMR (100 MHz,  $\text{DMSO-}d_6$ ):  $\delta = 113.2, 116.1, 117.2, 118.5, 121.3, 122.3, 124.3, 124.4, 125.05, 125.12, 125.3, 126.0,$

126.5, 127.5, 128.2, 128.3, 128.7, 129.6, 130.4, 131.5, 131.8, 132.5, 133.3, 134.6, 134.6, 139.0, 142.7 ppm. HRMS (ESI<sup>+</sup>): calcd for C<sub>27</sub>H<sub>17</sub>N<sub>2</sub>S [M-BF<sub>4</sub><sup>-</sup>]<sup>+</sup> 401.1107, found 401.1103.

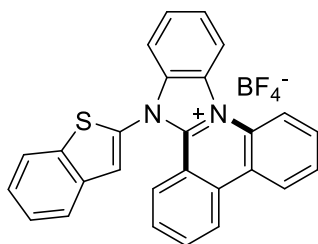

**9-(benzo[*b*]thiophen-2-yl)-9*H*-benzo[4,5]imidazo[1,2-*f*]phenanthridin-14-ium tetrafluoroborate (3t):** A light yellow solid (52.0 mg, 53% yield). <sup>1</sup>H NMR (400 MHz, DMSO-*d*<sub>6</sub>): δ = 7.64-7.79 (m, 4H), 7.90 (t, *J* = 7.6 Hz, 1H), 7.96-8.05 (m, 3H), 8.13-8.22 (m, 4H), 8.30 (d, *J* = 7.6 Hz, 1H), 9.10-9.16 (m, 2H), 9.24-9.30 (m, 2H) ppm. <sup>13</sup>C NMR (100 MHz, DMSO-*d*<sub>6</sub>): δ = 113.4, 116.1, 117.1, 118.4, 122.3, 123.6, 124.3, 125.3, 125.8, 127.1, 127.6, 127.9, 128.4, 128.9, 129.7, 131.1, 131.8, 132.5, 133.0, 134.7, 135.3, 137.0, 139.5, 143.3 ppm. HRMS (ESI<sup>+</sup>): calcd for C<sub>27</sub>H<sub>17</sub>N<sub>2</sub>S [M-BF<sub>4</sub><sup>-</sup>]<sup>+</sup> 401.1107, found 401.1108.

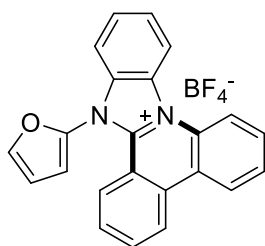

**9-(furan-2-yl)-9*H*-benzo[4,5]imidazo[1,2-*f*]phenanthridin-14-ium tetrafluoroborate (3u):** A light yellow solid (33.8 mg, 47% yield). <sup>1</sup>H NMR (400 MHz, DMSO-*d*<sub>6</sub>): δ = 7.14 (s, 1H), 7.22-7.25 (m, 2H), 7.75 (d, *J* = 6.8 Hz, 1H), 7.87 (t, *J* = 6.8 Hz, 1H), 7.96-8.03 (m, 3H), 8.13 (t, *J* = 7.6 Hz, 1H), 8.20 (t, *J* = 6.8 Hz, 1H), 8.30 (s, 1H), 9.11-9.14 (m, 2H), 9.22-9.27 (m, 2H) ppm. <sup>13</sup>C NMR (100 MHz, DMSO-*d*<sub>6</sub>): δ = 110.7, 113.0, 113.6, 115.5, 117.5, 118.7, 122.5, 124.5, 124.8, 125.3, 127.8, 128.1, 128.6, 129.2, 130.0, 131.1, 131.9, 132.8, 134.3, 135.1, 137.1, 143.5, 144.9 ppm. HRMS (ESI<sup>+</sup>): calcd for C<sub>23</sub>H<sub>15</sub>N<sub>2</sub>O [M-BF<sub>4</sub><sup>-</sup>]<sup>+</sup> 335.1179, found 335.1172.

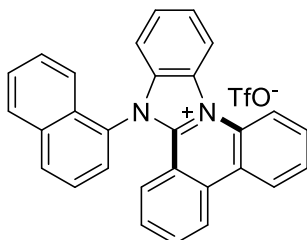

**9-(naphthalen-1-yl)-9*H*-benzo[4,5]imidazo[1,2-*f*]phenanthridin-14-ium trifluoromethanesulfonate (3v):** A white solid (42.4 mg, 39% yield). <sup>1</sup>H NMR (400 MHz, DMSO-*d*<sub>6</sub>): δ = 7.20 (d, *J* = 8.4 Hz, 1H), 7.25 (d, *J* = 8.4 Hz, 1H), 7.48 (t, *J* = 7.6 Hz, 1H), 7.55 (t, *J* = 7.6 Hz, 1H), 7.75-7.82 (m, 3H), 7.94-8.05 (m, 4H), 8.12-8.20 (m, 2H), 8.36 (d, *J* = 8.4 Hz, 1H), 8.57 (d, *J* = 8.4 Hz, 1H), 9.09 (d, *J* = 8.0 Hz, 1H), 9.15 (d, *J* = 8.4 Hz, 1H), 9.31-9.38 (m, 2H) ppm. <sup>13</sup>C NMR (100

MHz, DMSO-*d*<sub>6</sub>):  $\delta$  = 113.3, 116.1, 117.3, 118.5, 122.1, 122.3, 124.4, 125.2, 125.3, 126.8, 127.3, 127.4, 128.09, 128.13, 128.4, 128.6, 128.7, 128.898, 128.904, 129.1, 129.4, 130.3, 131.65, 131.71, 132.49, 132.52, 134.4, 134.5, 134.9, 142.6 ppm. HRMS (ESI<sup>+</sup>): calcd for C<sub>29</sub>H<sub>19</sub>N<sub>2</sub> [M-TfO<sup>-</sup>]<sup>+</sup> 395.1543, found 395.1543.

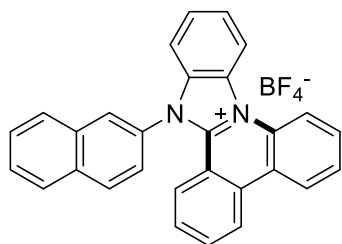

**9-(naphthalen-2-yl)-9H-benzo[4,5]imidazo[1,2-f]phenanthridin-14-ium tetrafluoroborate (3w):**

A white solid (66.5 mg, 69% yield). <sup>1</sup>H NMR (400 MHz, DMSO-*d*<sub>6</sub>):  $\delta$  = 7.52-7.58 (m, 3H), 7.81-7.86 (m, 3H), 7.93-8.08 (m, 4H), 8.15 (t, *J* = 7.6 Hz, 1H), 8.22 (d, *J* = 7.2 Hz, 1H), 8.30 (m, *J* = 7.6 Hz, 1H), 8.51 (d, *J* = 8.0 Hz, 1H), 8.58 (s, 1H), 9.07-9.13 (m, 2H), 9.26-9.31 (m, 2H) ppm. <sup>13</sup>C NMR (100 MHz, DMSO-*d*<sub>6</sub>):  $\delta$  = 113.6, 116.3, 117.0, 118.4, 122.2, 124.3, 124.4, 125.3, 125.8, 127.4, 127.5, 127.9, 128.1, 128.2, 128.4, 128.6, 128.7, 128.8, 129.4, 131.3, 131.6, 131.7, 132.0, 132.3, 133.3, 133.9, 134.4, 135.0, 142.4 ppm. HRMS (ESI<sup>+</sup>): calcd for C<sub>29</sub>H<sub>19</sub>N<sub>2</sub> [M-BF<sub>4</sub><sup>-</sup>]<sup>+</sup> 395.1543, found 395.1543.

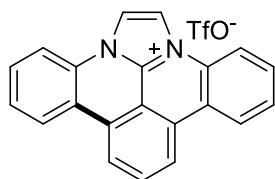

**tribenzo[*b,de,g*]imidazo[1,2,3-*ij*][1,8]naphthyridin-3-ium trifluoromethanesulfonate (4a):** A yellow solid (21.2 mg, 70% yield). <sup>1</sup>H NMR (400 MHz, DMSO-*d*<sub>6</sub>):  $\delta$  = 7.86 (t, *J* = 7.2 Hz, 2H), 8.00 (t, *J* = 7.6 Hz, 2H), 8.29 (t, *J* = 7.6 Hz, 1H), 8.61 (d, *J* = 8.0 Hz, 2H), 8.88 (d, *J* = 7.6 Hz, 4H), 9.53 (s, 2H) ppm. <sup>13</sup>C NMR (100 MHz, DMSO-*d*<sub>6</sub>):  $\delta$  = 111.6, 117.0, 117.4, 121.9, 122.1, 125.6, 128.2, 128.3, 129.6, 131.2, 133.1, 133.3 ppm. HRMS (ESI<sup>+</sup>): calcd for C<sub>21</sub>H<sub>13</sub>N<sub>2</sub><sup>+</sup> [M-CF<sub>3</sub>SO<sub>3</sub><sup>-</sup>]<sup>+</sup> 293.1073, found 293.1075.

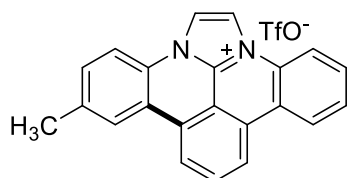

**12-methyltribenzo[*b,de,g*]imidazo[1,2,3-*ij*][1,8]naphthyridin-3-ium trifluoromethanesulfonate**

**(4b):** A light yellow solid (24.6 mg, 82% yield). <sup>1</sup>H NMR (400 MHz, DMSO-*d*<sub>6</sub>):  $\delta$  = 2.53 (s, 3H), 7.70 (d, *J* = 8.4 Hz, 1H), 7.84 (t, *J* = 7.6 Hz, 1H), 7.99 (t, *J* = 7.6 Hz, 1H), 8.21 (t, *J* = 8.0 Hz, 1H), 8.36 (d, *J* = 8.4 Hz, 1H), 8.52 (s, 1H), 8.57 (d, *J* = 8.4 Hz, 1H), 8.71 (d, *J* = 7.6 Hz, 1H), 8.78-8.83 (m, 4H) ppm. <sup>13</sup>C NMR (100 MHz, DMSO-*d*<sub>6</sub>):  $\delta$  = 20.9, 111.2, 116.75, 116.80, 116.9, 117.2, 121.4, 121.7,

121.77, 121.83, 125.0, 125.5, 127.2, 127.8, 128.0, 128.2, 129.4, 131.1, 132.0, 132.4, 133.0, 138.2. ppm. HRMS (ESI<sup>+</sup>): calcd for C<sub>22</sub>H<sub>15</sub>N<sub>2</sub><sup>+</sup> [M-CF<sub>3</sub>SO<sub>3</sub><sup>-</sup>]<sup>+</sup> 307.1230, found 307.1226.

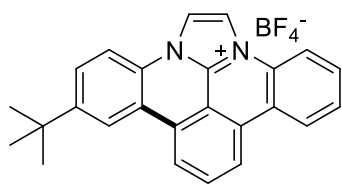

**12-(tert-butyl)tribenzo[*b,de,g*]imidazo[1,2,3-*ij*][1,8]naphthyridin-3-ium tetrafluoroborate (4c):**

A white solid (18.6 mg, 62% yield). <sup>1</sup>H NMR (400 MHz, DMSO-*d*<sub>6</sub>): δ = 1.53 (s, 9H), 7.87 (t, *J* = 7.2 Hz, 1H), 8.01 (t, *J* = 8.0 Hz, 1H), 8.09 (d, *J* = 8.4 Hz, 1H), 8.30 (t, *J* = 8.0 Hz, 1H), 8.55 (d, *J* = 8.8 Hz, 1H), 8.61 (d, *J* = 8.4 Hz, 1H), 8.80 (s, 1H), 8.89 (t, *J* = 8.0 Hz, 2H), 9.04 (d, *J* = 8.4 Hz, 1H), 9.52 (d, *J* = 5.6 Hz, 2H) ppm. <sup>13</sup>C NMR (100 MHz, DMSO-*d*<sub>6</sub>): δ = 31.2, 35.3, 111.8, 116.9, 117.0, 117.2, 117.4, 121.6, 121.7, 122.0, 122.4, 125.6, 127.7, 128.2, 128.3, 128.4, 128.9, 129.7, 131.2, 133.0, 133.1, 151.3 ppm. HRMS (ESI<sup>+</sup>): calcd for C<sub>25</sub>H<sub>21</sub>N<sub>2</sub><sup>+</sup> [M-BF<sub>4</sub><sup>-</sup>]<sup>+</sup> 349.1699, found 349.1693.

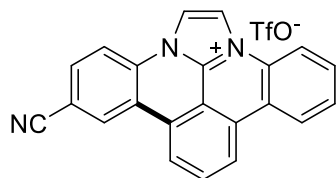

**12-cyanotribenzo[*b,de,g*]imidazo[1,2,3-*ij*][1,8]naphthyridin-3-ium trifluoromethanesulfonate (4d):**

A yellow solid (18.9 mg, 63% yield). <sup>1</sup>H NMR (400 MHz, DMSO-*d*<sub>6</sub>): δ = 7.93 (t, *J* = 7.6 Hz, 1H), 8.07 (t, *J* = 8.0 Hz, 1H), 8.45 (t, *J* = 8.0 Hz, 1H), 8.52 (t, *J* = 8.8 Hz, 1H), 8.70 (d, *J* = 8.4 Hz, 1H), 8.87 (d, *J* = 8.4 Hz, 1H), 9.0 (d, *J* = 8.0 Hz, 1H), 9.06-9.12 (m, 2H), 9.59 (s, 1H), 9.65 (s, 2H) ppm. <sup>13</sup>C NMR (100 MHz, DMSO-*d*<sub>6</sub>): δ = 111.2, 112.3, 117.57, 117.63, 117.7, 118.0, 118.9, 121.9, 122.0, 122.9, 123.3, 125.9, 127.4, 128.5, 128.7, 129.7, 130.9, 131.6, 132.4, 133.8, 134.0, 134.2, 135.1 ppm. HRMS (ESI<sup>+</sup>): calcd for C<sub>22</sub>H<sub>12</sub>N<sub>3</sub><sup>+</sup> [M-CF<sub>3</sub>SO<sub>3</sub><sup>-</sup>]<sup>+</sup> 318.1026, found 318.1024.

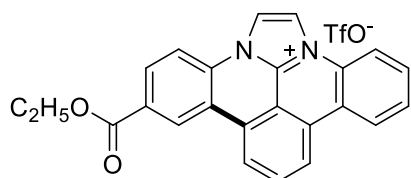

**12-(ethoxycarbonyl)tribenzo[*b,de,g*]imidazo[1,2,3-*ij*][1,8]naphthyridin-3-ium**

**trifluoromethanesulfonate (4e):** A light yellow solid (24.6 mg, 82% yield). <sup>1</sup>H NMR (400 MHz, DMSO-*d*<sub>6</sub>): δ = 1.46 (t, *J* = 7.2 Hz, 3H), 4.46 (q, *J* = 7.2 Hz, 2H), 7.87 (t, *J* = 7.2 Hz, 1H), 8.03 (t, *J* = 7.2 Hz, 1H), 8.33 (t, *J* = 8.0 Hz, 1H), 8.39 (dd, *J* = 1.2 Hz, *J* = 8.8 Hz, 1H), 8.63-8.69 (m, 2H), 8.88-8.95 (m, 3H), 9.15 (s, 1H), 9.59 (s, 2H) ppm. <sup>13</sup>C NMR (100 MHz, DMSO-*d*<sub>6</sub>): δ = 14.2, 61.7, 111.7, 117.47, 117.54, 118.1, 119.1, 121.87, 121.93, 122.3, 122.5, 122.8, 125.7, 126.3, 127.6, 128.4, 128.6,

129.4, 129.5, 131.0, 131.5, 132.3, 133.6, 133.7, 164.5 ppm. HRMS (ESI<sup>+</sup>): calcd for C<sub>24</sub>H<sub>17</sub>N<sub>2</sub>O<sub>2</sub><sup>+</sup> [M-CF<sub>3</sub>SO<sub>3</sub><sup>-</sup>]<sup>+</sup> 365.1285, found 365.1280.

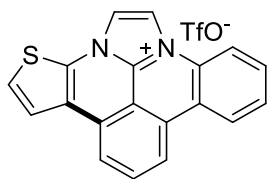

**dibenzo[*b,de*]imidazo[1,2,3-*ij*]thieno[3,2-*g*][1,8]naphthyridin-14-ium trifluoromethanesulfonate**

**(4j):** A yellow solid (24.0 mg, 80% yield). <sup>1</sup>H NMR (400 MHz, DMSO-*d*<sub>6</sub>): δ = 7.87 (t, *J* = 7.2 Hz, 1H), 8.00-8.05 (m, 2H), 8.30-8.36 (m, 2H), 8.66 (t, *J* = 9.6 Hz, 2H), 8.87 (d, *J* = 8.0 Hz, 1H), 8.92 (d, *J* = 8.8 Hz, 1H), 9.39 (d, *J* = 2.4 Hz, 1H), 9.59 (d, *J* = 2.0 Hz, 1H) ppm. <sup>13</sup>C NMR (100 MHz, DMSO-*d*<sub>6</sub>): δ = 111.3, 117.3, 117.5, 117.6, 120.7, 122.0, 122.1, 122.3, 122.7, 124.7, 125.7, 126.9, 127.2, 128.35, 128.39, 130.0, 131.3, 133.0, 133.3, 133.6 ppm. HRMS (ESI<sup>+</sup>): calcd for C<sub>19</sub>H<sub>11</sub>N<sub>2</sub>S<sup>+</sup> [M-CF<sub>3</sub>SO<sub>3</sub><sup>-</sup>]<sup>+</sup> 299.0637, found 299.0634.

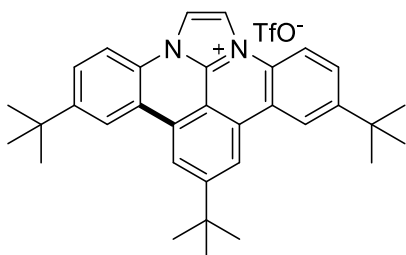

**6,9,12-tri-*tert*-butyltribenzo[*b,de,g*]imidazo[1,2,3-*ij*][1,8]naphthyridin-3-ium**

**trifluoromethanesulfonate (4k):** A yellow solid (21.0 mg, 70% yield). <sup>1</sup>H NMR (400 MHz, DMSO-*d*<sub>6</sub>): δ = 1.54 (s, 18H), 1.68 (s, 9H), 8.08 (d, *J* = 8.8 Hz, 2H), 8.59 (d, *J* = 8.8 Hz, 2H), 8.92 (s, 2H), 9.00 (s, 2H), 9.53 (s, 2H) ppm. <sup>13</sup>C NMR (100 MHz, DMSO-*d*<sub>6</sub>): δ = 31.2, 31.4, 35.3, 36.8, 110.4, 116.7, 117.1, 119.3, 121.8, 121.1, 128.0, 128.45, 128.52, 133.1, 151.1, 157.2 ppm. HRMS (ESI<sup>+</sup>): calcd for C<sub>33</sub>H<sub>37</sub>N<sub>2</sub><sup>+</sup> [M-CF<sub>3</sub>SO<sub>3</sub><sup>-</sup>]<sup>+</sup> 461.2951, found 461.2946.

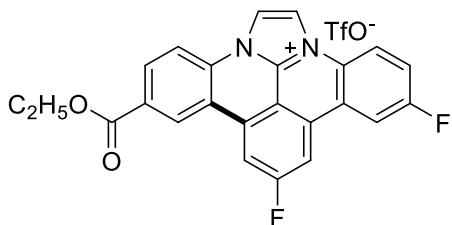

**12-(ethoxycarbonyl)-6,9-difluorotribenzo[*b,de,g*]imidazo[1,2,3-*ij*][1,8]naphthyridin-3-ium**

**trifluoromethanesulfonate (4l):** A yellow solid (15.9 mg, 53% yield). <sup>1</sup>H NMR (400 MHz, DMSO-*d*<sub>6</sub>): δ = 1.46 (t, *J* = 7.2 Hz, 3H), 4.47 (q, *J* = 7.2 Hz, 2H), 8.04-8.09 (m, 1H), 8.50 (d, *J* = 8.8 Hz, 1H), 8.76-8.81 (m, 2H), 8.90 (dd, *J* = 2.8 Hz, *J* = 10.0 Hz, 1H), 9.00 (d, *J* = 10.0 Hz, 1H), 9.13 (d, *J* = 10.0 Hz, 1H), 9.32 (s, 1H), 9.64 (d, *J* = 5.6 Hz, 2H) ppm. <sup>13</sup>C NMR (100 MHz, DMSO-*d*<sub>6</sub>): δ = 14.2, 61.7, 108.7, 111.1 (d, *J*<sub>CF</sub> = 10.7 Hz), 111.4 (d, *J*<sub>CF</sub> = 11.0 Hz), 112.3 (d, *J*<sub>CF</sub> = 25.2 Hz), 117.6 (d, *J*<sub>CF</sub> = 26.0

Hz), 118.1, 119.1, 120.1 (d,  $J_{CF} = 14.3$  Hz), 120.3, 121.2 (d,  $J_{CF} = 3.6$  Hz), 122.3, 123.4 (dd,  $J_{CF} = 3.5$  Hz,  $J_{CF} = 9.6$  Hz), 126.4, 127.0, 130.0, 130.5 (d,  $J_{CF} = 11.2$  Hz), 130.6 (dd,  $J_{CF} = 3.0$  Hz,  $J_{CF} = 11.1$  Hz), 131.8, 132.3, 132.7, 161.1 (d,  $J_{CF} = 245.7$  Hz), 164.2, 165.3 (d,  $J_{CF} = 250.3$  Hz) ppm. HRMS (ESI<sup>+</sup>): calcd for C<sub>24</sub>H<sub>15</sub>F<sub>2</sub>N<sub>2</sub>O<sub>2</sub><sup>+</sup> [M-CF<sub>3</sub>SO<sub>3</sub><sup>-</sup>]<sup>+</sup> 401.1096, found 401.1089.

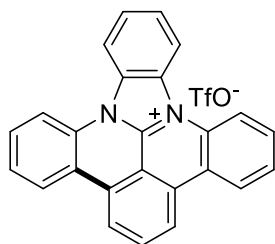

**tribenzo[*b,de,g*]benzo[4,5]imidazo[1,2,3-*ij*][1,8]naphthyridin-5-ium trifluoromethanesulfonate**

**(4m):** A white solid (17.1 mg, 57% yield). <sup>1</sup>H NMR (400 MHz, DMSO-*d*<sub>6</sub>):  $\delta = 7.91$  (t,  $J = 7.6$  Hz, 2H), 8.03-8.10 (m, 4H), 8.40 (t,  $J = 8.0$  Hz, 1H), 8.97 (t,  $J = 8.0$  Hz, 4H), 9.13 (d,  $J = 8.4$  Hz, 2H), 9.27-9.29 (m, 2H) ppm. <sup>13</sup>C NMR (100 MHz, DMSO-*d*<sub>6</sub>):  $\delta = 111.9, 116.8, 118.4, 122.0, 122.1, 125.8, 128.1, 129.1, 130.0, 131.3, 132.0, 135.2, 138.8$  ppm. HRMS (ESI<sup>+</sup>): calcd for C<sub>25</sub>H<sub>15</sub>N<sub>2</sub><sup>+</sup> [M-CF<sub>3</sub>SO<sub>3</sub><sup>-</sup>]<sup>+</sup> 343.1230, found 343.1228.

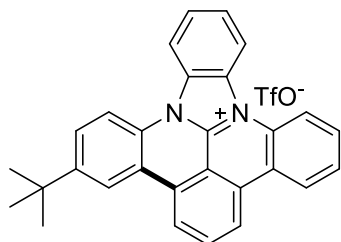

**14-(*tert*-butyl)tribenzo[*b,de,g*]benzo[4,5]imidazo[1,2,3-*ij*][1,8]naphthyridin-5-ium**

**trifluoromethanesulfonate (4n):** A light yellow solid (24.1 mg, 80% yield). <sup>1</sup>H NMR (400 MHz, DMSO-*d*<sub>6</sub>):  $\delta = 1.56$  (s, 9H), 7.91 (t,  $J = 7.6$  Hz, 1H), 8.03-8.12 (m, 4H), 8.41 (t,  $J = 8.0$  Hz, 1H), 8.89 (s, 1H), 8.97 (t,  $J = 8.8$  Hz, 2H), 9.06 (d,  $J = 8.8$  Hz, 1H), 9.11-9.14 (m, 2H), 9.26 (q,  $J = 4.4$  Hz, 2H) ppm. <sup>13</sup>C NMR (100 MHz, DMSO-*d*<sub>6</sub>):  $\delta = 31.1, 35.1, 111.9, 116.7, 116.8, 118.1, 118.3, 119.1, 121.86, 121.94, 121.97, 122.01, 122.04, 122.3, 122.4, 125.8, 127.99, 128.02, 129.08, 129.11, 129.16, 129.23, 130.0, 130.2, 131.3, 131.9, 135.1, 138.5, 150.8$  ppm. HRMS (ESI<sup>+</sup>): calcd for C<sub>29</sub>H<sub>23</sub>N<sub>2</sub><sup>+</sup> [M-CF<sub>3</sub>SO<sub>3</sub><sup>-</sup>]<sup>+</sup> 399.1856, found 399.1852.

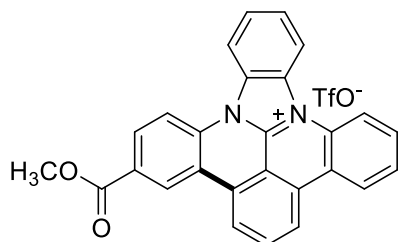

**14-(methoxycarbonyl)tribenzo[*b,de,g*]benzo[4,5]imidazo[1,2,3-*ij*][1,8]naphthyridin-5-ium**

**trifluoromethanesulfonate (4o):** A white solid (18.9 mg, 63% yield). <sup>1</sup>H NMR (400 MHz, DMSO-*d*<sub>6</sub>):  $\delta = 4.04$  (s, 3H), 7.95 (t,  $J = 7.6$  Hz, 1H), 8.06-8.13 (m, 3H), 8.36-8.40 (m, 2H), 8.99-9.02 (m,



3H), 9.16-9.26 (m, 4H), 9.31-9.34 (m, 1H) ppm.  $^{13}\text{C}$  NMR (100 MHz,  $\text{DMSO-}d_6$ ):  $\delta = 52.9, 111.9, 116.7, 117.1, 118.5, 119.0, 122.0, 122.2, 122.6, 122.8, 125.9, 126.4, 128.4, 128.5, 128.7, 129.0, 129.2, 129.3, 130.2, 131.1, 131.6, 132.2, 133.8, 135.5, 139.1, 164.9$  ppm. HRMS ( $\text{ESI}^+$ ): calcd for  $\text{C}_{27}\text{H}_{17}\text{N}_2\text{O}_2^+ [\text{M}-\text{CF}_3\text{SO}_3^-]^+$  401.1285, found 401.1288.

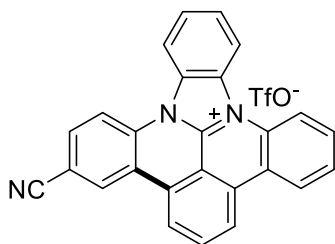

#### 14-cyanotribenzo[*b,de,g*]benzo[4,5]imidazo[1,2,3-*ij*][1,8]naphthyridin-5-ium

**trifluoromethanesulfonate (4p):** A light yellow solid (14.1 mg, 47% yield).  $^1\text{H}$  NMR (400 MHz,  $\text{DMSO-}d_6$ ):  $\delta = 8.00$  (t,  $J = 7.6$  Hz, 1H), 8.11-8.16 (m, 3H), 8.48 (dd,  $J = 2.0$  Hz,  $J = 8.6$  Hz, 1H), 8.57 (t,  $J = 8.0$  Hz, 1H), 9.12-9.27 (m, 4H), 9.35-9.41 (m, 3H), 9.69 (d,  $J = 2.0$  Hz, 1H) ppm.  $^{13}\text{C}$  NMR (100 MHz,  $\text{DMSO-}d_6$ ):  $\delta = 110.9, 112.6, 116.9, 117.1, 117.8, 118.6, 119.7, 122.2, 123.0, 123.1, 123.3, 126.1, 128.45, 128.48, 129.1, 129.2, 129.4, 130.3, 130.9, 131.3, 132.3, 133.9, 134.5, 135.6, 139.8$  ppm. HRMS ( $\text{ESI}^+$ ): calcd for  $\text{C}_{26}\text{H}_{14}\text{N}_3^+ [\text{M}-\text{CF}_3\text{SO}_3^-]^+$  368.1182, found 368.1181.

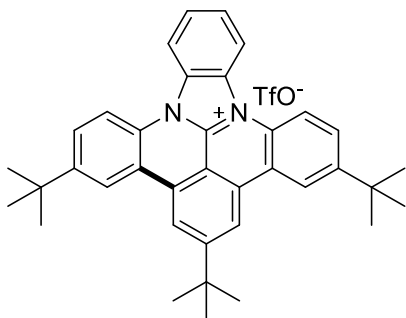

#### 8,11,14-tri-*tert*-butyltribenzo[*b,de,g*]benzo[4,5]imidazo[1,2,3-*ij*][1,8]naphthyridin-5-ium

**trifluoromethanesulfonate (4q):** A white solid (18.8 mg, 63% yield).  $^1\text{H}$  NMR (400 MHz,  $\text{DMSO-}d_6$ ):  $\delta = 1.57$  (s, 18H), 1.71 (s, 9H), 8.08-8.11 (m, 4H), 9.02 (d,  $J = 2.0$  Hz, 2H), 9.07 (s, 2H), 9.14 (t,  $J = 8.8$  Hz, 2H), 9.30-9.32 (m, 2H) ppm.  $^{13}\text{C}$  NMR (100 MHz,  $\text{DMSO-}d_6$ ):  $\delta = 31.2, 31.3, 35.2, 36.9, 39.5, 110.7, 116.6, 118.1, 119.2, 122.2, 127.7, 128.9, 129.3, 129.6, 130.3, 138.7, 150.6, 159.2$  ppm. HRMS ( $\text{ESI}^+$ ): calcd for  $\text{C}_{37}\text{H}_{39}\text{N}_2^+ [\text{M}-\text{CF}_3\text{SO}_3^-]^+$  511.3108, found 511.3103.

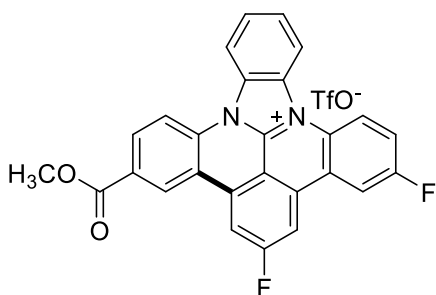

#### 8,11-difluoro-14-(methoxycarbonyl)tribenzo[*b,de,g*]benzo[4,5]imidazo[1,2,3-

***ij*][1,8]naphthyridin-5-ium trifluoromethanesulfonate (4r):** A light yellow solid (26.1 mg, 87% yield).  $^1\text{H}$  NMR (400 MHz,  $\text{DMSO-}d_6$ ):  $\delta$  = 4.02 (s, 3H), 7.98 (t,  $J$  = 8.4 Hz, 1H), 8.11-8.13 (m, 2H), 8.43 (d,  $J$  = 8.8 Hz, 1H), 8.95-9.01 (m, 2H), 9.10 (d,  $J$  = 10.0 Hz, 1H), 9.21-9.31 (m, 5H) ppm.  $^{13}\text{C}$  NMR (100 MHz,  $\text{DMSO-}d_6$ ):  $\delta$  = 52.9, 109.3, 111.3 (d,  $J_{\text{CF}}$  = 26.7 Hz), 111.5 (d,  $J_{\text{CF}}$  = 26.7 Hz), 112.8 (d,  $J_{\text{CF}}$  = 25.3 Hz), 116.7, 116.8, 119.0, 119.1, 120.4 (d,  $J_{\text{CF}}$  = 23.7 Hz), 121.3 (d,  $J_{\text{CF}}$  = 9.3 Hz), 121.6 (d,  $J_{\text{CF}}$  = 3.5 Hz), 122.3, 127.2, 128.02, 128.04, 128.6 (d,  $J_{\text{CF}}$  = 3.0 Hz), 128.8, 129.0 (d,  $J_{\text{CF}}$  = 12.5 Hz), 132.4, 132.8 (d,  $J_{\text{CF}}$  = 11.7 Hz), 134.0, 138.5, 160.7 (d,  $J_{\text{CF}}$  = 246.2 Hz), 164.8, 166.5 (d,  $J_{\text{CF}}$  = 252.8 Hz) ppm. HRMS (ESI<sup>+</sup>): calcd for  $\text{C}_{25}\text{H}_{17}\text{F}_2\text{N}_2\text{O}_2^+ [\text{M}-\text{CF}_3\text{SO}_3^-]^+$  437.1096, found 437.1089.

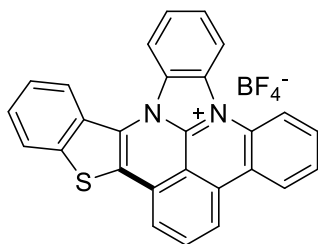

**dibenzo[*b,de*]benzo[4,5]imidazo[1,2,3-*ij*]benzo[4,5]thieno[2,3-*g*][1,8]naphthyridin-5-ium**

**tetrafluoroborate (4s):** A yellow solid (16.8 mg, 56% yield).  $^1\text{H}$  NMR (400 MHz,  $\text{DMSO-}d_6$ ):  $\delta$  = 7.78-7.84 (m, 2H), 7.92 (t,  $J$  = 7.6 Hz, 1H), 8.07-8.15 (m, 3H), 8.40-8.45 (m, 3H), 8.80 (d,  $J$  = 8.0 Hz, 1H), 8.96-9.00 (m, 3H), 9.16 (d,  $J$  = 8.4 Hz, 1H), 9.28 (d,  $J$  = 8.4 Hz, 1H) ppm.  $^{13}\text{C}$  NMR (100 MHz,  $\text{DMSO-}d_6$ ):  $\delta$  = 111.8, 116.5, 116.9, 118.6, 121.9, 122.0, 122.0, 123.8, 124.7, 125.9, 126.0, 126.8, 126.8, 127.96, 128.04, 128.09, 128.13, 128.6, 128.9, 129.1, 129.2, 130.3, 131.4, 132.2, 135.7, 138.1, 139.3 ppm. HRMS (ESI<sup>+</sup>): calcd for  $\text{C}_{27}\text{H}_{15}\text{N}_2\text{S}^+ [\text{M}-\text{BF}_4^-]^+$  399.0950, found 399.0948.

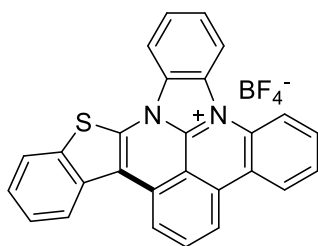

**dibenzo[*b,de*]benzo[4,5]imidazo[1,2,3-*ij*]benzo[4,5]thieno[3,2-*g*][1,8]naphthyridin-5-ium**

**tetrafluoroborate (4t):** A light yellow solid (18.0 mg, 60% yield).  $^1\text{H}$  NMR (400 MHz,  $\text{DMSO-}d_6$ ):  $\delta$  = 7.65-7.72 (m, 2H), 7.91 (t,  $J$  = 7.6 Hz, 1H), 8.05 (t,  $J$  = 8.0 Hz, 1H), 8.16-8.21 (m, 2H), 8.30-8.36 (m, 2H), 8.68-8.71 (m, 1H), 8.77 (d,  $J$  = 6.8 Hz, 1H), 8.90 (d,  $J$  = 8.0 Hz, 1H), 8.96 (d,  $J$  = 8.0 Hz, 2H), 9.09 (d,  $J$  = 8.4 Hz, 1H), 9.29-9.32 (m, 1H) ppm.  $^{13}\text{C}$  NMR (100 MHz,  $\text{DMSO-}d_6$ ):  $\delta$  = 111.3, 114.4, 117.0, 118.2, 119.1, 120.6, 121.4, 122.0, 124.0, 124.2, 126.0, 127.0, 127.2, 127.3, 128.15, 128.19, 128.5, 128.6, 129.0, 130.6, 131.2, 131.9, 132.3, 134.1, 134.7, 135.7, 137.2 ppm. HRMS (ESI<sup>+</sup>): calcd for  $\text{C}_{27}\text{H}_{15}\text{N}_2\text{S}^+ [\text{M}-\text{BF}_4^-]^+$  399.0950, found 399.0946.

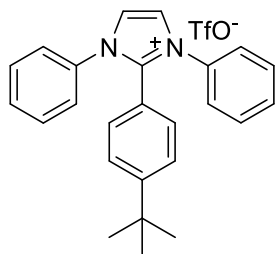

**2-(4-(*tert*-butyl)phenyl)-1,3-diphenyl-1*H*-imidazol-3-ium trifluoromethanesulfonate (5b):** A light yellow solid (87.4 mg, 87% yield).  $^1\text{H}$  NMR (400 MHz,  $\text{DMSO-}d_6$ ):  $\delta = 1.16$  (s, 9H), 7.32 (q,  $J = 10.4$  Hz, 4H), 7.48-7.55 (m, 10H), 8.39 (d,  $J = 0.8$  Hz, 2H) ppm.  $^{13}\text{C}$  NMR (100 MHz,  $\text{DMSO-}d_6$ ):  $\delta = 30.6, 34.7, 118.6, 124.0, 125.4, 126.4, 129.7, 130.3, 131.0, 135.1, 144.6, 154.5$  ppm. HRMS ( $\text{ESI}^+$ ): calcd for  $\text{C}_{25}\text{H}_{25}\text{N}_2$   $[\text{M}-\text{CF}_3\text{SO}_3^-]^+$  353.2012, found 353.2010.

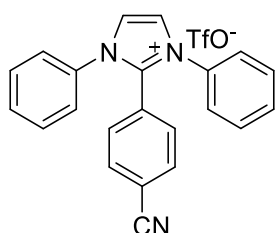

**2-(4-cyanophenyl)-1,3-diphenyl-1*H*-imidazol-3-ium trifluoromethanesulfonate (5c):** A yellow solid (87.6 mg, 93% yield).  $^1\text{H}$  NMR (400 MHz,  $\text{DMSO-}d_6$ ):  $\delta = 7.48$ -7.55 (m, 10H), 7.63 (d,  $J = 8.4$  Hz, 2H), 7.87 (s,  $J = 8.0$  Hz, 2H), 8.49 (s, 2H) ppm.  $^{13}\text{C}$  NMR (100 MHz,  $\text{DMSO-}d_6$ ):  $\delta = 114.4, 117.6, 124.5, 126.2, 126.4, 129.9, 130.6, 132.40, 132.44, 134.6, 142.7$  ppm. HRMS ( $\text{ESI}^+$ ): calcd for  $\text{C}_{22}\text{H}_{16}\text{N}_3$   $[\text{M}-\text{CF}_3\text{SO}_3^-]^+$  322.1339, found 322.1340.

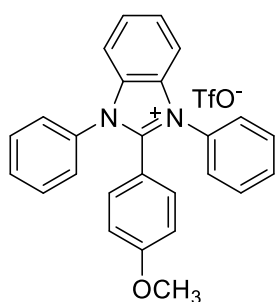

**2-(4-methoxyphenyl)-1,3-diphenyl-1*H*-benzo[*d*]imidazol-3-ium trifluoromethanesulfonate (5d):** A white solid (97.9 mg, 93% yield).  $^1\text{H}$  NMR (400 MHz,  $\text{DMSO-}d_6$ ):  $\delta = 3.70$  (s, 3H), 6.91 (d,  $J = 8.8$  Hz, 2H), 7.41 (q,  $J = 8.8$  Hz, 2H), 7.62-7.69 (m, 12H), 7.74-7.79 (m, 2H) ppm.  $^{13}\text{C}$  NMR (100 MHz,  $\text{DMSO-}d_6$ ):  $\delta = 55.4, 112.8, 113.2, 114.1, 127.5, 127.6, 130.3, 130.8, 132.4, 132.7, 133.1, 150.9, 161.8$  ppm. HRMS ( $\text{ESI}^+$ ): calcd for  $\text{C}_{26}\text{H}_{21}\text{N}_2\text{O}$   $[\text{M}-\text{CF}_3\text{SO}_3^-]^+$  377.1648, found 377.1644.

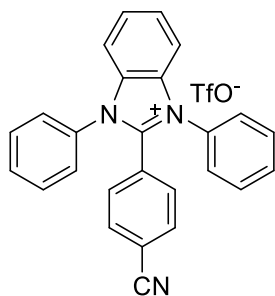

**2-(4-cyanophenyl)-1,3-diphenyl-1H-benzo[d]imidazol-3-ium trifluoromethanesulfonate (5e):** A light yellow solid (99.0 mg, 95% yield).  $^1\text{H}$  NMR (400 MHz,  $\text{DMSO-}d_6$ ):  $\delta = 7.66$  (br, 10H), 7.70-7.73 (m, 2H), 7.77 (d,  $J = 8.4$  Hz, 2H), 7.81-7.85 (m, 2H), 7.92 (d,  $J = 8.4$  Hz, 2H) ppm.  $^{13}\text{C}$  NMR (100 MHz,  $\text{DMSO-}d_6$ ):  $\delta = 113.6, 114.9, 117.4, 126.0, 127.4, 128.2, 130.5, 131.2, 132.0, 132.2, 132.5, 148.8$  ppm. HRMS (ESI $^+$ ): calcd for  $\text{C}_{26}\text{H}_{18}\text{N}_3$  [M-CF $_3$ SO $_3^-$ ] $^+$  372.1495, found 372.1496.

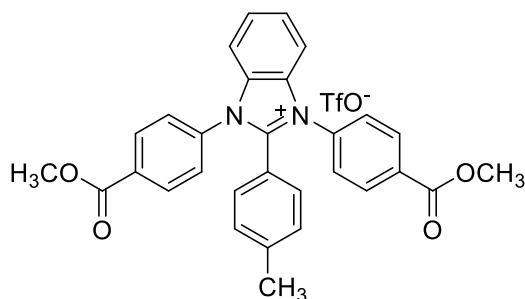

**1,3-bis(4-(methoxycarbonyl)phenyl)-2-(p-tolyl)-1H-benzo[d]imidazol-3-ium trifluoromethanesulfonate (5f):** A light yellow solid (110.2 mg, 88% yield).  $^1\text{H}$  NMR (400 MHz,  $\text{DMSO-}d_6$ ):  $\delta = 2.23$  (s, 3H), 3.90 (s, 6H), 7.18 (d,  $J = 7.6$  Hz, 2H), 7.37 (d,  $J = 8.0$  Hz, 2H), 7.71-7.75 (m, 2H), 7.78-7.83 (m, 6H), 8.20-8.22 (m, 4H) ppm.  $^{13}\text{C}$  NMR (100 MHz,  $\text{DMSO-}d_6$ ):  $\delta = 21.0, 52.6, 113.4, 117.8, 127.9, 128.1, 129.3, 131.1, 131.2, 131.7, 132.3, 136.2, 143.0, 150.8, 165.1$  ppm. HRMS (ESI $^+$ ): calcd for  $\text{C}_{30}\text{H}_{25}\text{N}_2\text{O}_4$  [M-CF $_3$ SO $_3^-$ ] $^+$  477.1809, found 477.1813.

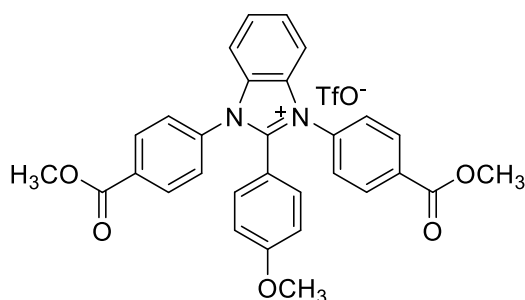

**1,3-bis(4-(methoxycarbonyl)phenyl)-2-(4-methoxyphenyl)-1H-benzo[d]imidazol-3-ium trifluoromethanesulfonate (5g):** A light yellow solid (105.3 mg, 82% yield).  $^1\text{H}$  NMR (400 MHz,  $\text{DMSO-}d_6$ ):  $\delta = 3.70$  (s, 3H), 3.90 (s, 6H), 6.92 (d,  $J = 8.8$  Hz, 2H), 7.38 (d,  $J = 8.8$  Hz, 2H), 7.70-7.73 (m, 2H), 7.77-7.80 (m, 6H), 8.23 (d,  $J = 8.4$  Hz, 4H) ppm.  $^{13}\text{C}$  NMR (100 MHz,  $\text{DMSO-}d_6$ ):  $\delta = 52.6, 55.4, 112.2, 113.3, 114.4, 127.8, 128.1, 131.2, 131.6, 132.2, 133.2, 136.4, 150.8, 162.0, 165.1$  ppm. HRMS (ESI $^+$ ): calcd for  $\text{C}_{30}\text{H}_{25}\text{N}_2\text{O}_5$  [M-CF $_3$ SO $_3^-$ ] $^+$  493.1758, found 493.1755.

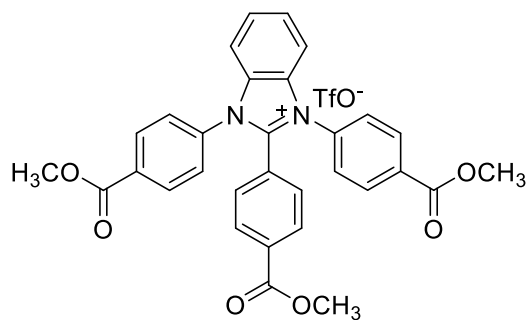

**1,2,3-tris(4-(methoxycarbonyl)phenyl)-1H-benzo[d]imidazol-3-ium trifluoromethanesulfonate**

**(5h):** A light yellow solid (122.0 mg, 91% yield).  $^1\text{H}$  NMR (400 MHz,  $\text{DMSO-}d_6$ ):  $\delta = 3.79$  (s, 3H), 3.89 (s, 6H), 7.66 (d,  $J = 8.0$  Hz, 2H), 7.76-7.86 (m, 8H), 7.92 (d,  $J = 8.4$  Hz, 2H), 8.20 (d,  $J = 8.8$  Hz, 4H) ppm.  $^{13}\text{C}$  NMR (100 MHz,  $\text{DMSO-}d_6$ ):  $\delta = 52.6, 52.7, 128.0, 128.1, 128.3, 129.3, 129.6, 131.3, 131.8, 131.87, 131.90, 132.3, 133.0, 135.8, 165.0, 165.1$  ppm. HRMS (ESI $^+$ ): calcd for  $\text{C}_{31}\text{H}_{25}\text{N}_2\text{O}_6$  [M-CF $_3$ SO $_3^-$ ] $^+$  521.1707, found 521.1705.

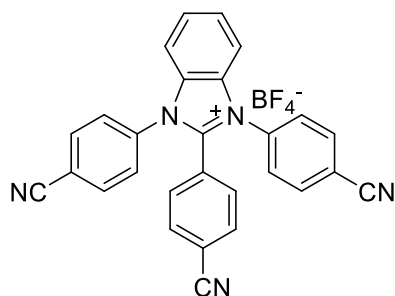

**1,2,3-tris(4-cyanophenyl)-1H-benzo[d]imidazol-3-ium tetrafluoroborate (5i):** A light yellow solid

(97.7 mg, 96% yield).  $^1\text{H}$  NMR (400 MHz,  $\text{DMSO-}d_6$ ):  $\delta = 7.71$  (d,  $J = 8.0$  Hz, 2H), 7.81-7.88 (m, 8H), 7.95 (d,  $J = 8.4$  Hz, 2H), 8.18 (d,  $J = 8.4$  Hz, 4H) ppm.  $^{13}\text{C}$  NMR (100 MHz,  $\text{DMSO-}d_6$ ):  $\delta = 113.7, 114.1, 115.4, 117.4, 117.5, 124.9, 128.6, 128.7, 132.1, 132.3, 132.9, 134.8, 135.5, 148.8$  ppm. HRMS (ESI $^+$ ): calcd for  $\text{C}_{28}\text{H}_{16}\text{N}_5$  [M-BF $_4^-$ ] $^+$  422.1400, found 422.1397.

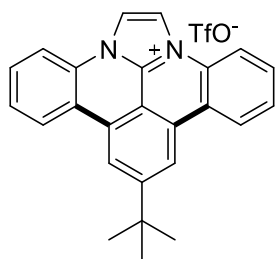

**9-(tert-butyl)tribenzo[b,de,g]imidazo[1,2,3-ij][1,8]naphthyridin-3-ium**

**trifluoromethanesulfonate (6b):** A yellow solid (15.9 mg, 53% yield).  $^1\text{H}$  NMR (400 MHz,  $\text{DMSO-}d_6$ ):  $\delta = 1.64$  (s, 9H), 7.91 (t,  $J = 7.2$  Hz, 2H), 8.04 (t,  $J = 7.6$  Hz, 2H), 8.68 (d,  $J = 8.4$  Hz, 2H), 9.02

(s, 2H), 9.19 (d,  $J = 8.0$  Hz, 2H), 9.56 (s, 2H) ppm.  $^{13}\text{C}$  NMR (100 MHz,  $\text{DMSO-}d_6$ ):  $\delta = 31.4, 36.7, 110.0, 116.9, 117.3, 119.4, 122.1, 125.9, 128.1, 128.2, 129.8, 131.0, 133.3, 157.5$  ppm. HRMS (ESI $^+$ ): calcd for  $\text{C}_{25}\text{H}_{21}\text{N}_2^+$  [M-CF $_3$ SO $_3^-$ ] $^+$  349.1699, found 349.1699.

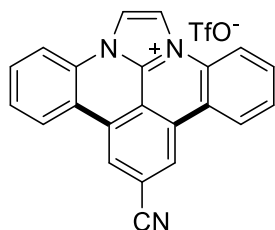

**9-cyanotribenzo[*b,de,g*]imidazo[1,2,3-*ij*][1,8]naphthyridin-3-ium trifluoromethanesulfonate (6c):** A light yellow solid (11.1 mg, 37% yield).  $^1\text{H}$  NMR (400 MHz,  $\text{DMSO-}d_6$ ):  $\delta = 7.98$  (t,  $J = 8.0$  Hz, 2H), 8.14 (t,  $J = 8.0$  Hz, 2H), 8.77 (d,  $J = 8.4$  Hz, 2H), 9.11 (d,  $J = 8.4$  Hz, 2H), 9.57 (s, 2H), 9.74 (s, 2H) ppm.  $^{13}\text{C}$  NMR (100 MHz,  $\text{DMSO-}d_6$ ):  $\delta = 114.1, 115.5, 117.7, 118.0, 118.4, 121.3, 125.8, 126.3, 128.8, 129.1, 130.1, 132.3, 132.7$  ppm. HRMS ( $\text{ESI}^+$ ): calcd for  $\text{C}_{22}\text{H}_{12}\text{N}_3^+$  [ $\text{M}-\text{CF}_3\text{SO}_3^-$ ] $^+$  318.1026, found 318.1023.

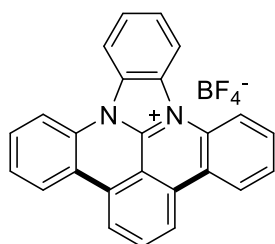

**tribenzo[*b,de,g*]benzo[4,5]imidazo[1,2,3-*ij*][1,8]naphthyridin-5-ium tetrafluoroborate (4m $'$ ):** A light yellow solid (15.1 mg, 50% yield).  $^1\text{H}$  NMR (400 MHz,  $\text{DMSO-}d_6$ ):  $\delta = 7.95$  (t,  $J = 7.2$  Hz, 2H), 8.06-8.12 (m, 4H), 8.48 (t,  $J = 8.0$  Hz, 1H), 9.04-9.07 (m, 4H), 9.20 (d,  $J = 8.4$  Hz, 2H), 9.32-9.35 (m, 2H) ppm.  $^{13}\text{C}$  NMR (100 MHz,  $\text{DMSO-}d_6$ ):  $\delta = 111.6, 116.7, 118.3, 121.9, 122.0, 125.7, 128.1, 129.0, 129.9, 131.1, 132.0, 135.2, 138.5$  ppm. HRMS ( $\text{ESI}^+$ ): calcd for  $\text{C}_{25}\text{H}_{15}\text{N}_2^+$  [ $\text{M}-\text{BF}_4^-$ ] $^+$  343.1230, found 343.1226.

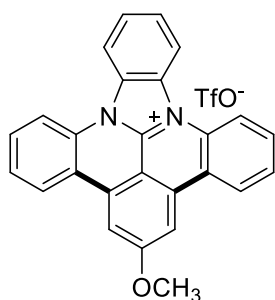

**11-methoxytribenzo[*b,de,g*]benzo[4,5]imidazo[1,2,3-*ij*][1,8]naphthyridin-5-ium trifluoromethanesulfonate (6d):** A red solid (14.1 mg, 47% yield).  $^1\text{H}$  NMR (400 MHz,  $\text{DMSO-}d_6$ ):  $\delta = 4.09$  (s, 3H), 7.75 (t,  $J = 7.6$  Hz, 2H), 7.94 (t,  $J = 8.0$  Hz, 2H), 7.99-8.01 (m, 2H), 8.16 (s, 2H), 8.79 (d,  $J = 8.0$  Hz, 2H), 8.92 (s,  $J = 8.4$  Hz, 2H), 9.08-9.10 (m, 2H) ppm.  $^{13}\text{C}$  NMR (100 MHz,  $\text{DMSO-}d_6$ ):  $\delta = 56.9, 105.4, 107.9, 116.5, 118.1, 121.2, 126.0, 127.65, 127.74, 128.8, 131.1, 132.06, 132.11, 137.9, 165.0$  ppm. HRMS ( $\text{ESI}^+$ ): calcd for  $\text{C}_{26}\text{H}_{17}\text{N}_2\text{O}^+$  [ $\text{M}-\text{CF}_3\text{SO}_3^-$ ] $^+$  373.1335, found 373.1325.

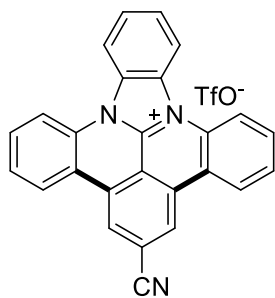

**11-cyanotribenzo[*b,de,g*]benzo[4,5]imidazo[1,2,3-*ij*][1,8]naphthyridin-5-ium**

**trifluoromethanesulfonate (6e):** A yellow solid (18.9 mg, 63% yield).  $^1\text{H}$  NMR (400 MHz,  $\text{DMSO-}d_6$ ):  $\delta$  = 8.00 (t,  $J$  = 7.6 Hz, 2H), 8.14-8.18 (m, 4H), 9.17 (d,  $J$  = 8.0 Hz, 2H), 9.27 (d,  $J$  = 8.8 Hz, 2H), 9.39-9.42 (m, 2H), 9.60 (s, 2H) ppm.  $^{13}\text{C}$  NMR (100 MHz,  $\text{DMSO-}d_6$ ):  $\delta$  = 114.1, 117.1, 117.2, 118.1, 118.6, 121.3, 125.5, 126.4, 128.5, 128.7, 129.3, 130.8, 131.6, 133.0, 138.2 ppm. HRMS ( $\text{ESI}^+$ ): calcd for  $\text{C}_{26}\text{H}_{14}\text{N}_3^+ [\text{M}-\text{CF}_3\text{SO}_3^-]^+$  368.1182, found 368.1185.

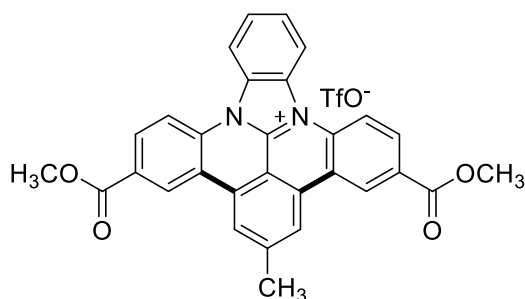

**8,14-bis(methoxycarbonyl)-11-methyltribenzo[*b,de,g*]benzo[4,5]imidazo[1,2,3-*ij*][1,8]naphthyridin-5-ium**

**trifluoromethanesulfonate (6f):** A light yellow solid (15.9 mg, 53% yield).  $^1\text{H}$  NMR (400 MHz,  $\text{DMSO-}d_6$ ):  $\delta$  = 2.46 (s, 3H), 4.03 (s, 6H), 8.11-8.13 (m, 2H), 8.30 (d,  $J$  = 8.8 Hz, 2H), 8.59 (s, 2H), 8.93 (s, 2H), 9.08 (d,  $J$  = 9.2 Hz, 2H), 9.16-9.18 (m, 2H) ppm.  $^{13}\text{C}$  NMR (100 MHz,  $\text{DMSO-}d_6$ ):  $\delta$  = 22.2, 52.9, 116.8, 119.0, 121.8, 123.6, 123.7, 126.2, 126.3, 128.6, 128.8, 128.9, 129.0, 131.7, 133.6, 148.0, 164.8 ppm. HRMS ( $\text{ESI}^+$ ): calcd for  $\text{C}_{30}\text{H}_{21}\text{N}_2\text{O}_4^+ [\text{M}-\text{CF}_3\text{SO}_3^-]^+$  473.1496, found 473.1493.

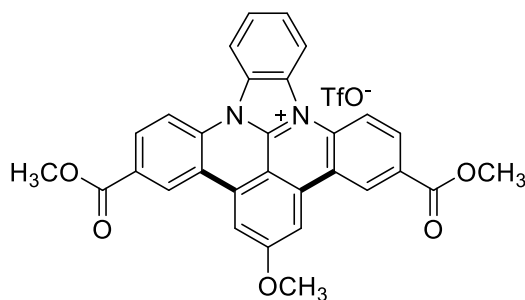

**11-methoxy-8,14-bis(methoxycarbonyl)tribenzo[*b,de,g*]benzo[4,5]imidazo[1,2,3-*ij*][1,8]naphthyridin-5-ium**

**trifluoromethanesulfonate (6g):** A light yellow solid (12.0 mg, 40% yield).  $^1\text{H}$  NMR (400 MHz,  $\text{DMSO-}d_6$ ):  $\delta$  = 4.02-4.03 (m, 9H), 8.04-8.06 (m, 2H), 8.13 (s, 2H), 8.29 (d,  $J$  = 9.2 Hz, 2H), 9.00-9.02 (m, 4H), 9.06-9.09 (m, 2H) ppm.  $^{13}\text{C}$  NMR (100 MHz,  $\text{DMSO-}d_6$ ):  $\delta$  =

52.8, 57.1, 105.3, 108.9, 116.5, 118.7, 121.2, 126.6, 128.3, 128.5, 128.7, 131.4, 131.9, 133.5, 138.4, 164.7, 165.3 ppm. HRMS (ESI<sup>+</sup>): calcd for C<sub>30</sub>H<sub>21</sub>N<sub>2</sub>O<sub>5</sub><sup>+</sup> [M-CF<sub>3</sub>SO<sub>3</sub><sup>-</sup>]<sup>+</sup> 489.1445, found 489.1442.

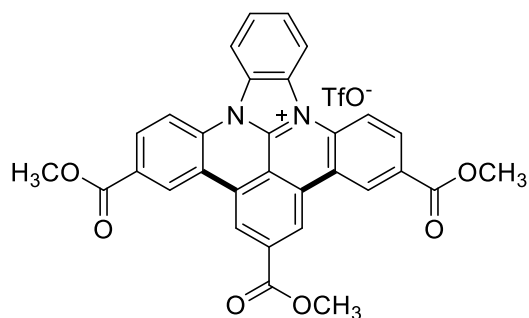

**8,11,14-tris(methoxycarbonyl)tribenzo[*b,de,g*]benzo[4,5]imidazo[1,2,3-*ij*][1,8]naphthyridin-5-ium trifluoromethanesulfonate (6h):** A yellow solid (15.3 mg, 51% yield). <sup>1</sup>H NMR (400 MHz, DMSO-*d*<sub>6</sub>): δ = 4.07 (s, 6H), 4.10 (s, 3H), 8.21-8.23 (m, 2H), 8.52 (dd, *J* = 2.0 Hz, *J* = 8.8 Hz, 2H), 9.33-9.38 (m, 8H) ppm. <sup>13</sup>C NMR (100 MHz, DMSO-*d*<sub>6</sub>): δ = 52.9, 53.0, 114.9, 117.0, 119.3, 122.1, 122.9, 126.8, 128.9, 129.2, 129.3, 130.0, 132.3, 134.1, 135.7, 139.6, 164.9, 165.3 ppm. HRMS (ESI<sup>+</sup>): calcd for C<sub>31</sub>H<sub>21</sub>N<sub>2</sub>O<sub>6</sub><sup>+</sup> [M-CF<sub>3</sub>SO<sub>3</sub><sup>-</sup>]<sup>+</sup> 517.1394, found 517.1393.

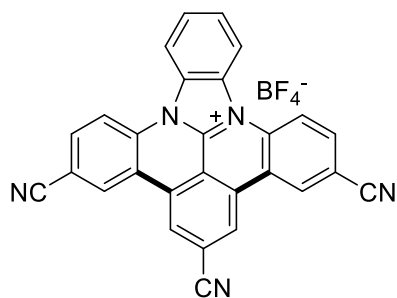

**8,11,14-tricyanotribenzo[*b,de,g*]benzo[4,5]imidazo[1,2,3-*ij*][1,8]naphthyridin-5-ium tetrafluoroborate (6i):**

Filtration with a funnel and washing with dichloromethane and methanol to provide **6i** as a yellow solid (24.3 mg, 81% yield). <sup>1</sup>H NMR (400 MHz, DMSO-*d*<sub>6</sub>): δ = 8.24 (d, *J* = 6.4 Hz, 2H), 8.61 (d, *J* = 8.8 Hz, 2H), 9.47-9.51 (m, 4H), 9.82 (d, *J* = 5.2 Hz, 4H) ppm. <sup>13</sup>C NMR (100 MHz, DMSO-*d*<sub>6</sub>): δ = 111.5, 115.0, 117.3, 117.4, 117.6, 117.7, 120.1, 122.2, 127.2, 129.3, 129.7, 131.5, 133.9, 135.4, 139.7 ppm. HRMS (ESI<sup>+</sup>): calcd for C<sub>28</sub>H<sub>12</sub>N<sub>5</sub><sup>+</sup> [M-BF<sub>4</sub><sup>-</sup>]<sup>+</sup> 418.1087, found 418.1089.

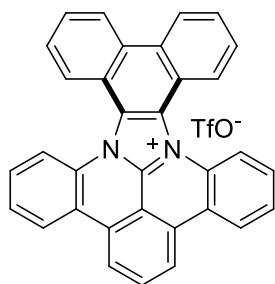

**tribenzo[*b,de,g*]phenanthro[9',10':4,5]imidazo[1,2,3-*ij*][1,8]naphthyridin-17-ium**

**trifluoromethanesulfonate (4x):** A light yellow solid (30.8 mg, 52% yield). <sup>1</sup>H NMR (400 MHz,



DMSO-*d*<sub>6</sub>):  $\delta = 7.94$ - $8.04$  (m, 8H),  $8.52$  (t,  $J = 8.0$  Hz, 1H),  $8.64$  (d,  $J = 7.6$  Hz, 4H),  $9.11$ - $9.18$  (m, 6H) ppm. <sup>13</sup>C NMR (100 MHz, DMSO-*d*<sub>6</sub>):  $\delta = 112.1, 120.0, 120.9, 122.5, 123.0, 123.8, 125.2, 126.1, 126.3, 127.7, 128.6, 128.9, 129.98, 130.03, 130.1, 131.1, 134.5, 138.9$  ppm. HRMS (ESI<sup>+</sup>): calcd for C<sub>28</sub>H<sub>12</sub>N<sub>5</sub><sup>+</sup> [M-CF<sub>3</sub>SO<sub>3</sub><sup>-</sup>]<sup>+</sup> 443.1543, found 443.1590.

#### IV. DFT Calculations

Density functional theory (DFT) calculations were performed using the Gaussian 09 program. The configuration optimizations were finished using B3LYP level of density functional theory with the 6-31G(d) basis. The counter anion was deleted. Electron-density difference maps of the lowest lying relaxed singlet excited state (S1) as compared to the ground state (S0) at the same geometry for **5a** (a), **3f** (b) and **5x** (c); isocontour value = 0.001 au. The green (red) color indicates an increase (decrease) of electron density in a given molecular region upon excitation.

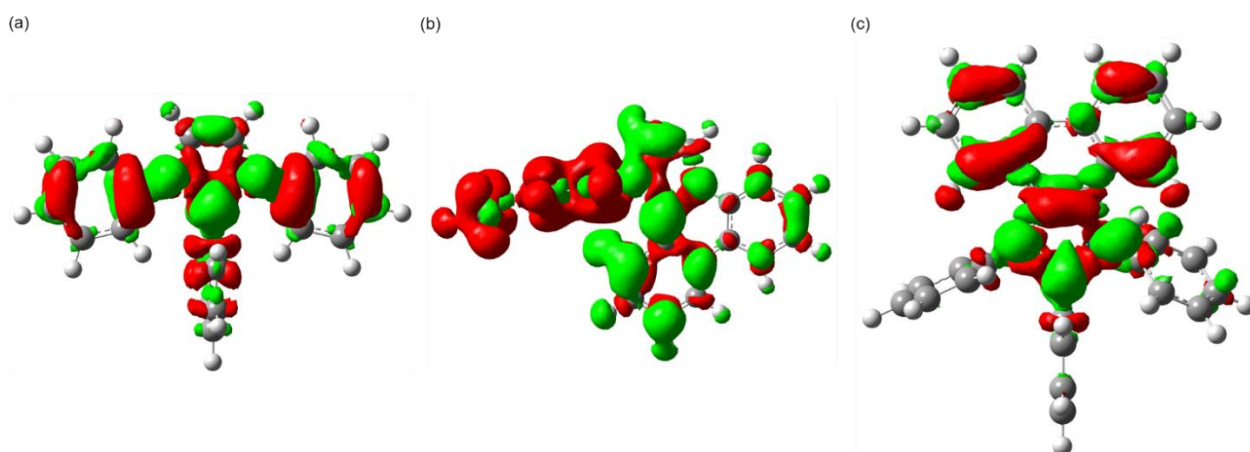

**Fig. S1** Electron-density difference maps of **5a** (a), **3f** (b) and **5x** (c).

**Table S3** Cartesian coordinates of optimized species

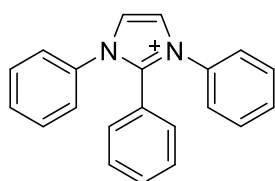

| Symbolic   | Z-matrix         |          |          |
|------------|------------------|----------|----------|
| Charge = 1 | Multiplicity = 1 |          |          |
| C          | -4.57772         | 1.77229  | -0.47557 |
| C          | -3.44963         | 2.50897  | -0.67039 |
| N          | -2.34822         | 1.6903   | -0.45041 |
| C          | -2.84132         | 0.46412  | -0.12428 |
| N          | -4.20242         | 0.47931  | -0.13033 |
| C          | -5.17652         | -0.62273 | 0.16198  |

|   |          |          |          |
|---|----------|----------|----------|
| C | -1.97389 | -0.77652 | 0.20783  |
| C | -0.92688 | 2.15268  | -0.57145 |
| C | 0.1696   | 1.32472  | -0.35001 |
| C | 1.47706  | 1.81583  | -0.47886 |
| C | 1.70218  | 3.14039  | -0.83066 |
| C | 0.61869  | 3.9784   | -1.05479 |
| C | -0.68718 | 3.48879  | -0.92627 |
| C | -1.58192 | -1.02643 | 1.53303  |
| C | -0.80218 | -2.14431 | 1.8275   |
| C | -0.41275 | -3.01204 | 0.80625  |
| C | -0.79909 | -2.76854 | -0.51247 |
| C | -1.57883 | -1.65304 | -0.81584 |
| C | -4.79085 | -1.91461 | 0.50703  |
| C | -5.74987 | -2.90386 | 0.76918  |
| C | -7.1053  | -2.61169 | 0.68909  |
| C | -7.5055  | -1.3279  | 0.34623  |
| C | -6.54846 | -0.33946 | 0.08427  |
| H | -5.60911 | 2.06541  | -0.55522 |
| H | -3.34639 | 3.54314  | -0.94611 |
| H | 0.10885  | 0.28768  | -0.07457 |
| H | 2.32387  | 1.15418  | -0.30192 |
| H | 2.71837  | 3.51645  | -0.92934 |
| H | 0.78885  | 5.01742  | -1.33076 |
| H | -1.47457 | 4.20468  | -1.11743 |
| H | -1.88164 | -0.35472 | 2.33514  |
| H | -0.49526 | -2.34367 | 2.85277  |
| H | 0.1961   | -3.88418 | 1.03971  |
| H | -0.48976 | -3.45187 | -1.30145 |
| H | -1.87613 | -1.4703  | -1.84668 |
| H | -3.77274 | -2.24684 | 0.59731  |
| H | -5.4306  | -3.90985 | 1.03787  |
| H | -7.84536 | -3.38278 | 0.89345  |
| H | -8.56642 | -1.09293 | 0.2819   |
| H | -6.94188 | 0.63348  | -0.17574 |

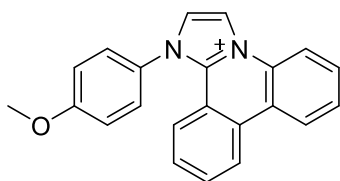

| Symbolic   | Z-matrix         |          |         |
|------------|------------------|----------|---------|
| Charge = 1 | Multiplicity = 1 |          |         |
| C          | -16.72662        | -0.06214 | 0.01059 |
| C          | -16.70736        | -1.42822 | 0.0246  |
| N          | -15.38258        | -1.79333 | 0.08476 |
| C          | -14.60091        | -0.70706 | 0.11265 |
| N          | -15.40701        | 0.36999  | 0.06257 |
| C          | -15.01684        | 1.7527   | 0.05622 |

|   |           |          |          |
|---|-----------|----------|----------|
| C | -13.04662 | -0.84143 | 0.18596  |
| C | -14.8076  | -3.16734 | 0.11482  |
| C | -15.66819 | -4.27645 | 0.08037  |
| C | -15.15256 | -5.56756 | 0.09951  |
| C | -13.78088 | -5.75044 | 0.15245  |
| C | -12.92577 | -4.64277 | 0.18944  |
| C | -13.39778 | -3.30525 | 0.17389  |
| C | -12.52308 | -2.16069 | 0.21344  |
| C | -11.11021 | -2.2717  | 0.28125  |
| C | -10.26455 | -1.1613  | 0.31994  |
| C | -10.80228 | 0.11082  | 0.29116  |
| C | -12.18308 | 0.2689   | 0.22393  |
| C | -14.88529 | 2.40634  | 1.27176  |
| C | -14.4962  | 3.74422  | 1.25079  |
| C | -14.25148 | 4.40072  | 0.03502  |
| C | -14.42678 | 3.71673  | -1.17388 |
| C | -14.818   | 2.37612  | -1.16878 |
| O | -13.8559  | 5.70157  | 0.16642  |
| C | -13.3924  | 6.36195  | -1.00653 |
| H | -17.51593 | 0.67013  | -0.03074 |
| H | -17.49419 | -2.16026 | -0.00318 |
| H | -16.74507 | -4.16955 | 0.03724  |
| H | -15.81652 | -6.42944 | 0.07199  |
| H | -13.36478 | -6.75711 | 0.16531  |
| H | -11.86242 | -4.86896 | 0.22923  |
| H | -10.61611 | -3.24055 | 0.30871  |
| H | -9.18617  | -1.29858 | 0.37352  |
| H | -10.14869 | 0.98031  | 0.32216  |
| H | -12.54599 | 1.28772  | 0.20474  |
| H | -15.06419 | 1.90101  | 2.21436  |
| H | -14.37056 | 4.28841  | 2.18584  |
| H | -14.26794 | 4.20576  | -2.13082 |
| H | -14.95111 | 1.84188  | -2.10367 |
| H | -13.02432 | 7.34927  | -0.71165 |
| H | -12.55895 | 5.81786  | -1.46366 |
| H | -14.2082  | 6.50773  | -1.7217  |

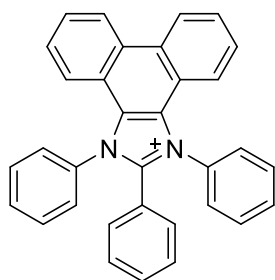

| Symbolic   | Z-matrix         |          |          |
|------------|------------------|----------|----------|
| Charge = 1 | Multiplicity = 1 |          |          |
| C          | -3.05049         | 1.77632  | -3.89376 |
| C          | -2.4412          | 0.63616  | -4.52797 |
| N          | -1.69667         | -0.08299 | -3.52596 |

|   |          |          |          |
|---|----------|----------|----------|
| C | -1.80916 | 0.6092   | -2.37535 |
| N | -2.595   | 1.81749  | -2.58245 |
| C | -2.474   | 2.93542  | -1.73319 |
| C | -1.04293 | 0.23698  | -1.07382 |
| C | -0.84468 | -1.23934 | -3.6565  |
| C | -1.32039 | -2.46227 | -3.20197 |
| C | -0.48847 | -3.57364 | -3.31147 |
| C | 0.7903   | -3.43704 | -3.86361 |
| C | 1.24534  | -2.18989 | -4.30758 |
| C | 0.42183  | -1.07139 | -4.20278 |
| C | 0.21715  | 0.79388  | -0.82642 |
| C | 0.91778  | 0.45613  | 0.33062  |
| C | 0.36498  | -0.44338 | 1.24088  |
| C | -0.88856 | -1.00466 | 0.99737  |
| C | -1.5931  | -0.66567 | -0.15815 |
| C | -2.04112 | 4.16662  | -2.24133 |
| C | -1.90964 | 5.25925  | -1.38365 |
| C | -2.20252 | 5.12376  | -0.02699 |
| C | -2.6263  | 3.89515  | 0.47809  |
| C | -2.7601  | 2.79647  | -0.37162 |
| C | -3.95245 | 2.62442  | -4.5514  |
| C | -4.10173 | 2.42876  | -5.95092 |
| C | -3.44103 | 1.33123  | -6.62274 |
| C | -2.6478  | 0.39051  | -5.90348 |
| C | -4.71054 | 3.59235  | -3.86874 |
| C | -5.55334 | 4.45699  | -4.56073 |
| C | -5.6639  | 4.3469   | -5.93537 |
| C | -4.95978 | 3.34586  | -6.61147 |
| C | -3.57007 | 1.09262  | -8.01505 |
| C | -2.99155 | -0.00837 | -8.65213 |
| C | -2.26711 | -0.92695 | -7.91476 |
| C | -2.09898 | -0.73188 | -6.54597 |
| H | -2.31452 | -2.5529  | -2.78017 |
| H | -0.82917 | -4.54746 | -2.96687 |
| H | 1.43841  | -4.30827 | -3.94433 |
| H | 2.24324  | -2.09651 | -4.73014 |
| H | 0.76169  | -0.09758 | -4.53624 |
| H | 0.65274  | 1.49784  | -1.53147 |
| H | 1.89382  | 0.89472  | 0.52412  |
| H | 0.91305  | -0.70737 | 2.14257  |
| H | -1.31384 | -1.70711 | 1.71035  |
| H | -2.56845 | -1.10857 | -0.3417  |
| H | -1.78872 | 4.29374  | -3.29149 |
| H | -1.5757  | 6.21863  | -1.77218 |
| H | -2.09967 | 5.97755  | 0.63895  |
| H | -2.85712 | 3.79502  | 1.53603  |
| H | -3.11745 | 1.85911  | 0.04559  |
| H | -4.68733 | 3.69411  | -2.78822 |
| H | -6.12294 | 5.21168  | -4.02382 |

|   |          |          |          |
|---|----------|----------|----------|
| H | -6.3159  | 5.02065  | -6.48651 |
| H | -5.12145 | 3.29355  | -7.68476 |
| H | -4.14256 | 1.76301  | -8.65067 |
| H | -3.12595 | -0.1499  | -9.72211 |
| H | -1.83279 | -1.79734 | -8.40104 |
| H | -1.54156 | -1.49462 | -6.02125 |

## V. Single Crystal X-ray Crystallographic Data

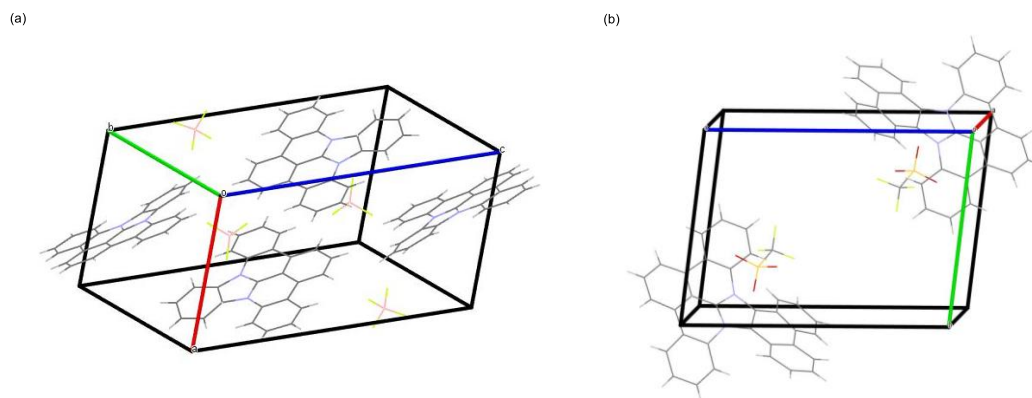

**Fig. S2** Wireframe model of the packing structures of **4m'** (a) and **4x** (b)

**Table S4.** Crystal data and structure refinement for **4m'**

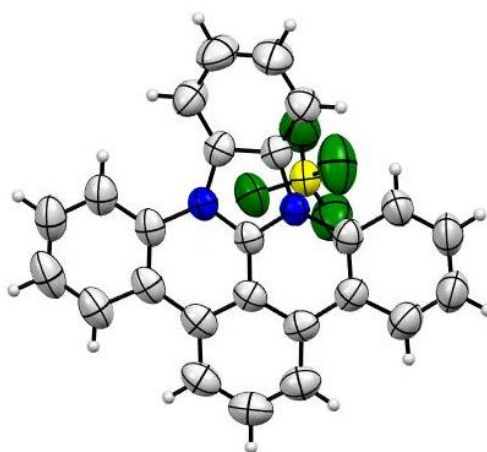

|                     |                                                                |
|---------------------|----------------------------------------------------------------|
| Identification code | 2114143                                                        |
| Empirical formula   | C <sub>25</sub> H <sub>15</sub> BF <sub>4</sub> N <sub>2</sub> |
| Formula weight      | 430.20                                                         |
| Temperature/K       | 301.0                                                          |
| Crystal system      | monoclinic                                                     |
| Space group         | P2 <sub>1</sub> /n                                             |
| a/Å                 | 8.4814(4)                                                      |

|                                          |                                                                  |
|------------------------------------------|------------------------------------------------------------------|
| b/Å                                      | 14.5840(9)                                                       |
| c/Å                                      | 16.2845(10)                                                      |
| $\alpha$ /°                              | 90                                                               |
| $\beta$ /°                               | 103.547(2)                                                       |
| $\gamma$ /°                              | 90                                                               |
| Volume/Å <sup>3</sup>                    | 1958.23(19)                                                      |
| Z                                        | 4                                                                |
| $\rho_{\text{calc}}/\text{cm}^3$         | 1.459                                                            |
| $\mu/\text{mm}^{-1}$                     | 0.112                                                            |
| F(000)                                   | 880.0                                                            |
| Crystal size/mm <sup>3</sup>             | 0.38 × 0.34 × 0.29                                               |
| Radiation                                | MoK $\alpha$ ( $\lambda = 0.71073$ )                             |
| 2 $\theta$ range for data collection/°   | 5.008 to 55.074                                                  |
| Index ranges                             | -10 ≤ h ≤ 11, -18 ≤ k ≤ 18, -21 ≤ l ≤ 21                         |
| Reflections collected                    | 90776                                                            |
| Independent reflections                  | 4495 [ $R_{\text{int}} = 0.0999$ , $R_{\text{sigma}} = 0.0298$ ] |
| Data/restraints/parameters               | 4495/4/289                                                       |
| Goodness-of-fit on F <sup>2</sup>        | 1.032                                                            |
| Final R indexes [ $I \geq 2\sigma(I)$ ]  | $R_1 = 0.0718$ , $wR_2 = 0.2064$                                 |
| Final R indexes [all data]               | $R_1 = 0.1228$ , $wR_2 = 0.2533$                                 |
| Largest diff. peak/hole/eÅ <sup>-3</sup> | 0.72/-0.31                                                       |

**Table S5.** Crystal data and structure refinement for **4x**

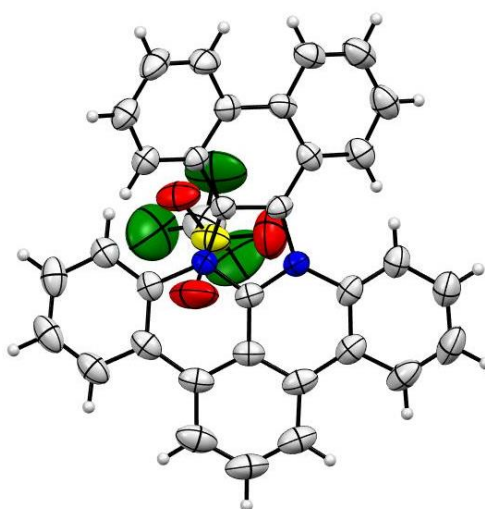

|                                          |                                                                                |
|------------------------------------------|--------------------------------------------------------------------------------|
| Identification code                      | 2114141                                                                        |
| Empirical formula                        | C <sub>34</sub> H <sub>19</sub> F <sub>3</sub> N <sub>2</sub> O <sub>3</sub> S |
| Formula weight                           | 592.57                                                                         |
| Temperature/K                            | 293.15                                                                         |
| Crystal system                           | triclinic                                                                      |
| Space group                              | P-1                                                                            |
| a/Å                                      | 9.3567(6)                                                                      |
| b/Å                                      | 10.7079(6)                                                                     |
| c/Å                                      | 14.3234(8)                                                                     |
| α/°                                      | 81.633(5)                                                                      |
| β/°                                      | 87.519(5)                                                                      |
| γ/°                                      | 83.289(5)                                                                      |
| Volume/Å <sup>3</sup>                    | 1409.56(14)                                                                    |
| Z                                        | 2                                                                              |
| ρ <sub>calc</sub> /g/cm <sup>3</sup>     | 1.396                                                                          |
| μ/mm <sup>-1</sup>                       | 0.174                                                                          |
| F(000)                                   | 608.0                                                                          |
| Crystal size/mm <sup>3</sup>             | 0.35 × 0.3 × 0.25                                                              |
| Radiation                                | MoKα (λ = 0.71073)                                                             |
| 2θ range for data collection/°           | 5.904 to 52.742                                                                |
| Index ranges                             | -8 ≤ h ≤ 11, -13 ≤ k ≤ 13, -17 ≤ l ≤ 16                                        |
| Reflections collected                    | 11362                                                                          |
| Independent reflections                  | 5757 [R <sub>int</sub> = 0.0249, R <sub>sigma</sub> = 0.0506]                  |
| Data/restraints/parameters               | 5757/0/388                                                                     |
| Goodness-of-fit on F <sup>2</sup>        | 1.094                                                                          |
| Final R indexes [I ≥ 2σ (I)]             | R <sub>1</sub> = 0.0749, wR <sub>2</sub> = 0.2067                              |
| Final R indexes [all data]               | R <sub>1</sub> = 0.1117, wR <sub>2</sub> = 0.2298                              |
| Largest diff. peak/hole/eÅ <sup>-3</sup> | 0.99/-0.35                                                                     |

## VI. Optical Properties of Selected Compounds

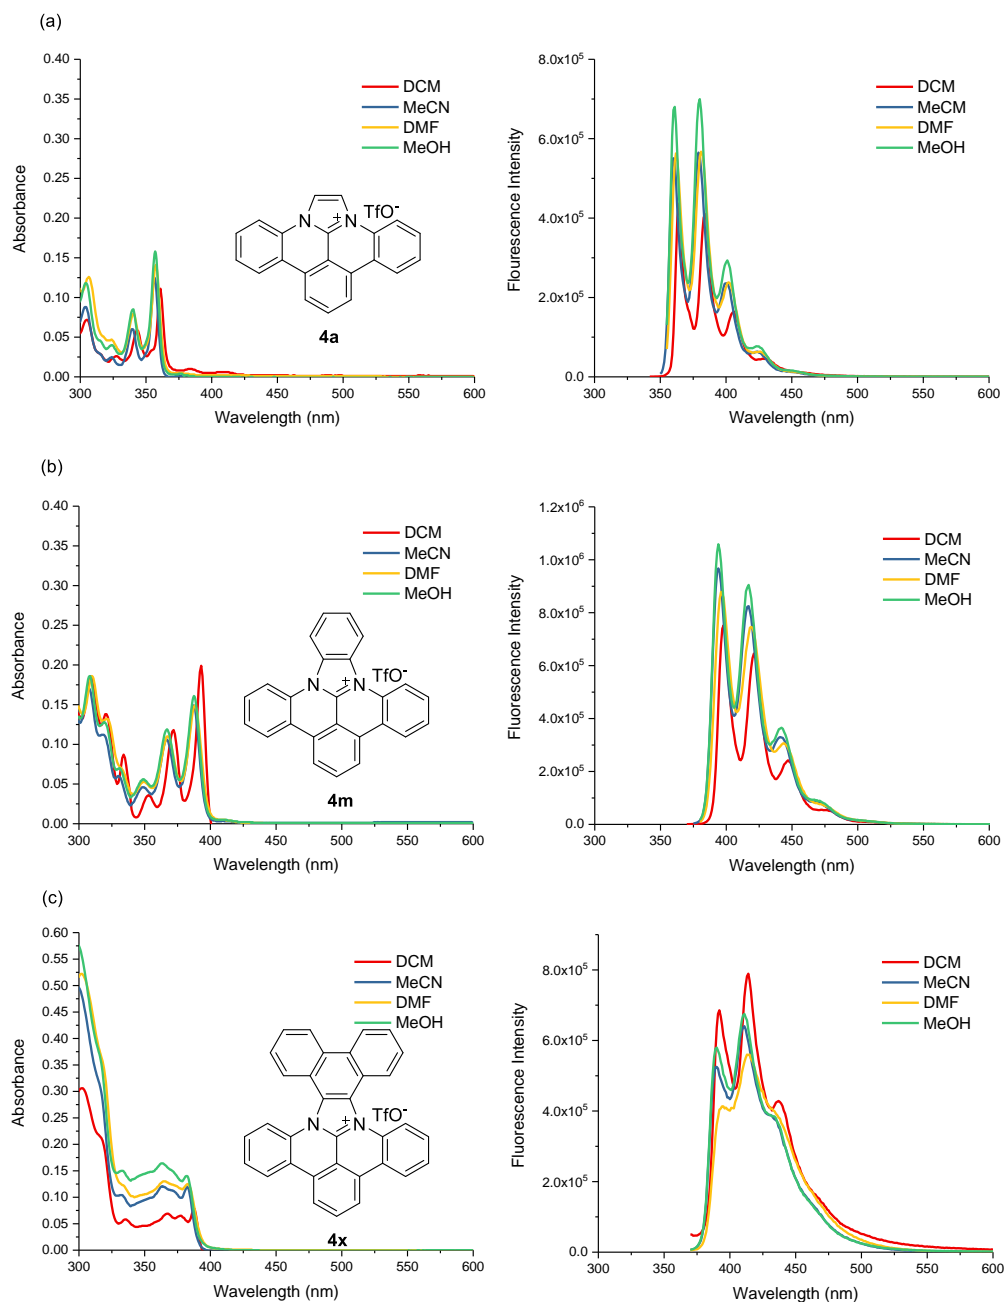

**Fig. S3** UV-visible absorption and emission spectra of **4a** (a), **4m** (b) and **4x** (c) in different solvents.

**Table S6** UV-visible absorption and emission data of some selected compounds

| Compd.    | $\lambda_{\text{abs}}^a$ (nm) | $\epsilon$ ( $\text{M}^{-1} \text{cm}^{-1}$ ) | $\lambda_{\text{em}}^b$ (nm) | $\Phi_{\text{F}}^c$ |
|-----------|-------------------------------|-----------------------------------------------|------------------------------|---------------------|
| <b>4a</b> | 361                           | 11100                                         | 364, 384, 406, 430           | 0.29                |
| <b>4c</b> | 362                           | 22900                                         | 366, 386, 408, 433           | 0.34                |
| <b>4d</b> | 393                           | 11200                                         | 398, 422, 447, 477           | 0.27                |
| <b>4j</b> | 368                           | 17400                                         | 373, 394, 416, 443           | 0.14                |
| <b>4m</b> | 393                           | 19900                                         | 398, 422, 447, 477           | 0.29                |
| <b>4n</b> | 396                           | 25800                                         | 401, 425, 451, 483           | 0.30                |
| <b>4p</b> | 363                           | 10200                                         | 368, 387, 409, 433           | 0.29                |
| <b>4q</b> | 393                           | 24200                                         | 398, 422, 448, 480           | 0.46                |



|           |     |       |                    |      |
|-----------|-----|-------|--------------------|------|
| <b>4s</b> | 306 | 30300 | 434, 459, 489      | 0.34 |
| <b>4t</b> | 418 | 26100 | 430, 454, 485      | 0.12 |
| <b>4x</b> | 302 | 30600 | 392, 414, 437      | 0.30 |
| <b>6c</b> | 376 | 12800 | 379, 401, 424, 451 | 0.18 |
| <b>6d</b> | 310 | 35400 | 379, 401, 425, 451 | 0.21 |
| <b>6e</b> | 312 | 20800 | 415, 441, 470, 504 | 0.18 |
| <b>6h</b> | 408 | 11400 | 413, 438, 467, 501 | 0.22 |

<sup>a</sup>The maximum absorption band over 300 nm. <sup>b</sup>Emission bands excited at the longest maximum absorption band. <sup>c</sup>Absolute quantum yield. Concentration:  $1.0 \times 10^{-5}$  M in CH<sub>2</sub>Cl<sub>2</sub>.

## VII. References

[1] (a) H. Zhang, Q. Cai, D. Ma, *J. Org. Chem.*, 2005, **70**, 5164. (b) L. Zhu, L. Cheng, Y. Zhang, R. Xie, J. You, *J. Org. Chem.*, 2007, **72**, 2737. (c) L. Zhu, P. Guo, G. Li, J. Lan, R. Xie, J. You, *J. Org. Chem.*, 2007, **72**, 8535.

[2] (a) T. Lv, Z. Wang, J. You, J. Lan, G. Gao, *J. Org. Chem.*, 2013, **78**, 5723. (b) T.-Y. Lv, L. Yang, Y.-S. Zhao, F.-J. Song, J.-B. Lan, J.-S. You, G. Gao, *Chin. Chem. Lett.*, 2013, **24**, 773; (c) S. Li, J. Tang, Y. Zhao, R. Jiang, T. Wang, G. Gao, J. You, *Chem. Commun.*, 2017, **53**, 3489. (d) S. Li, H. Lv, Y. Yu, X. Ye, B. Li, S. Yang, Y. Mo, X. Kong, *Chem. Commun.*, 2019, **55**, 11267.

[3] (a) D. Zhu, Q. Liu, B. Luo, M. Chen, P. Huang, R. Pi, S. Wen, *Adv. Synth. Catal.*, 2013, **355**, 2172. (b) G. Akimoto, M. Otsuka, K. Miyamoto, A. Muranaka, D. Hashizume, R. Takita, M. Uchiyama, *Chem. Asian J.*, 2018, **13**, 913. (c) W. Liang, Y. Yang, M. Yang, M. Zhang, C. Li, Y. Ran, J. Lan, Z. Bin, J. You, *Angew. Chem. Int. Ed.*, 2021, **60**, 3493.

# VIII. Copies of <sup>1</sup>H and <sup>13</sup>C NMR Spectra

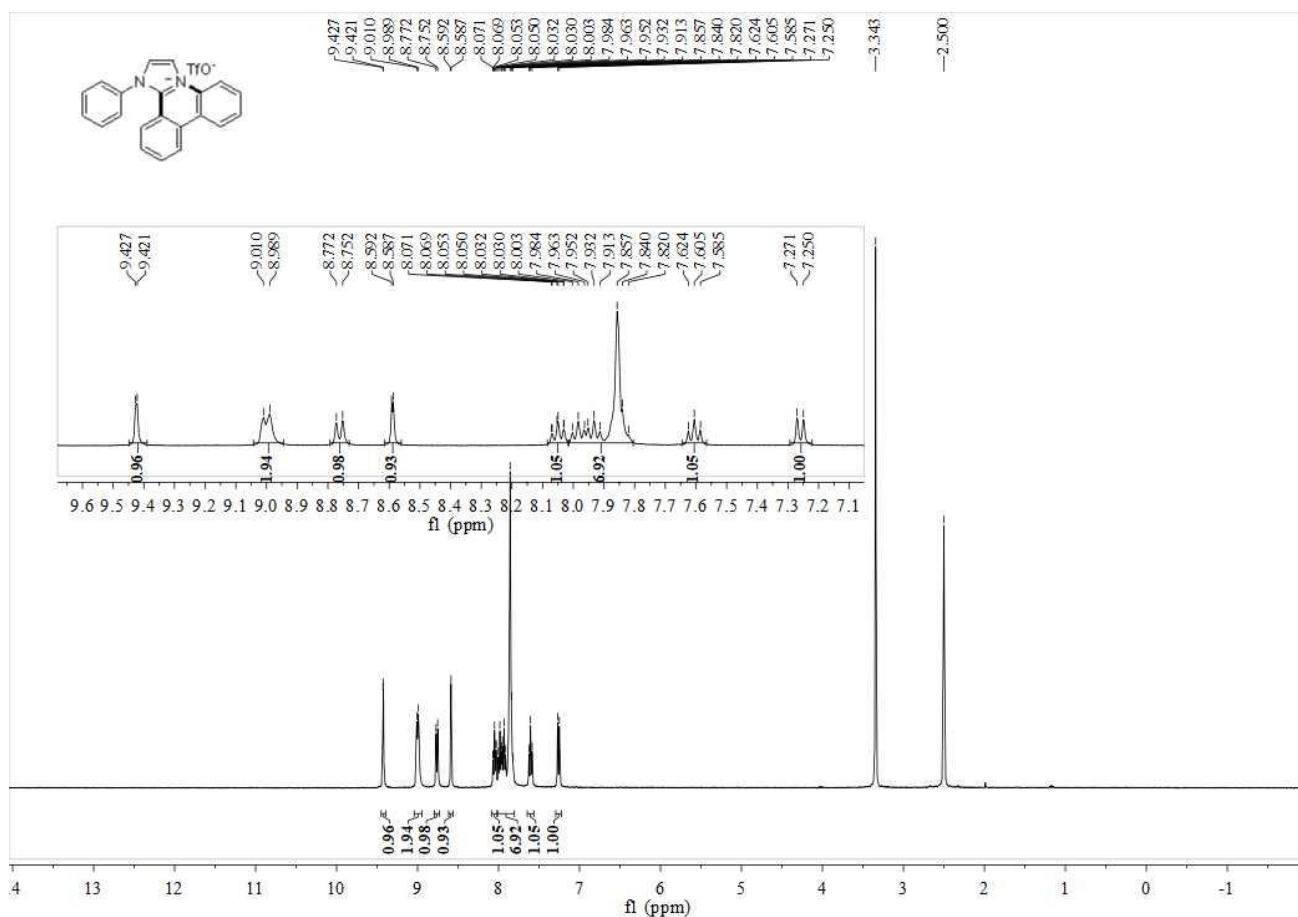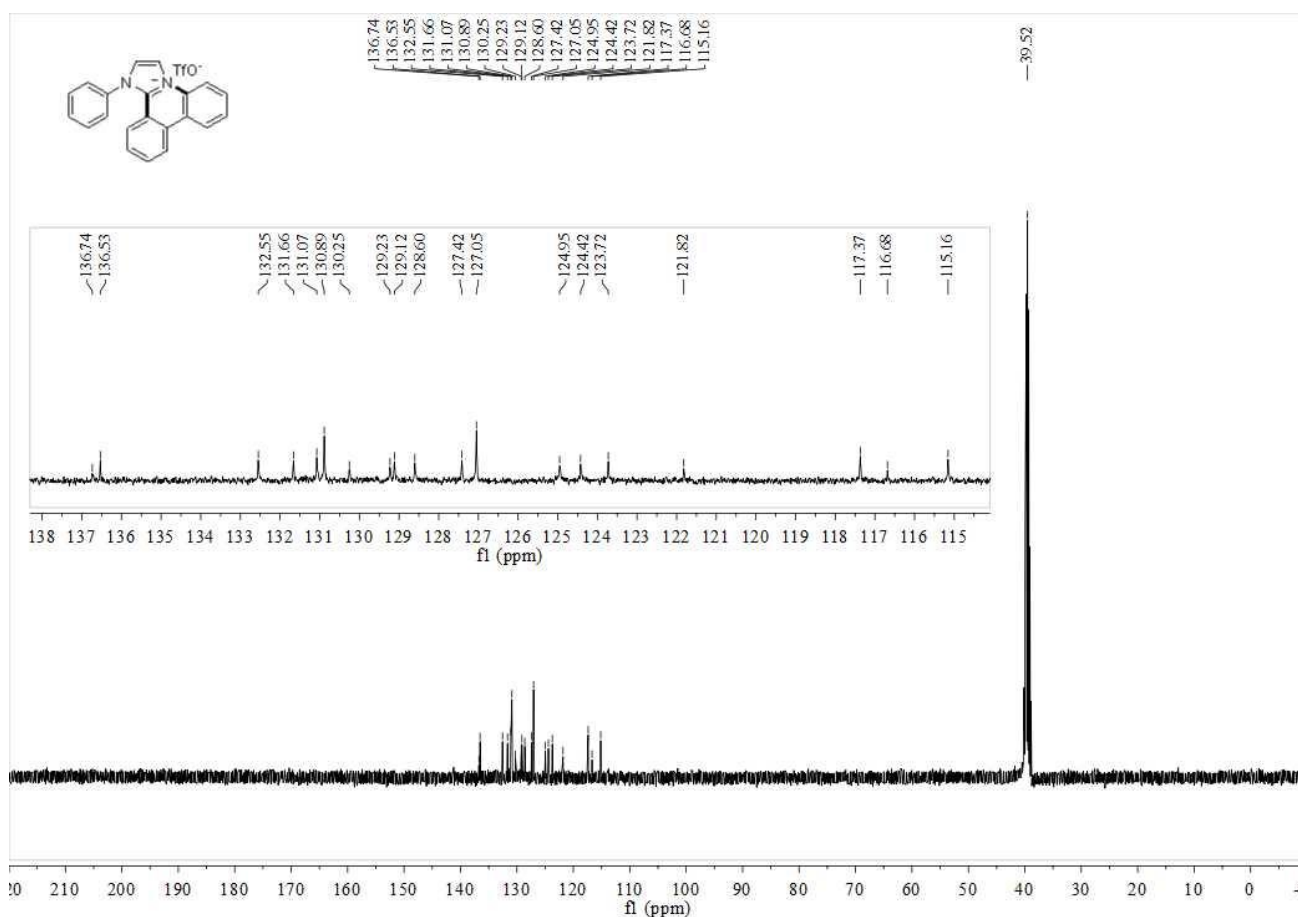

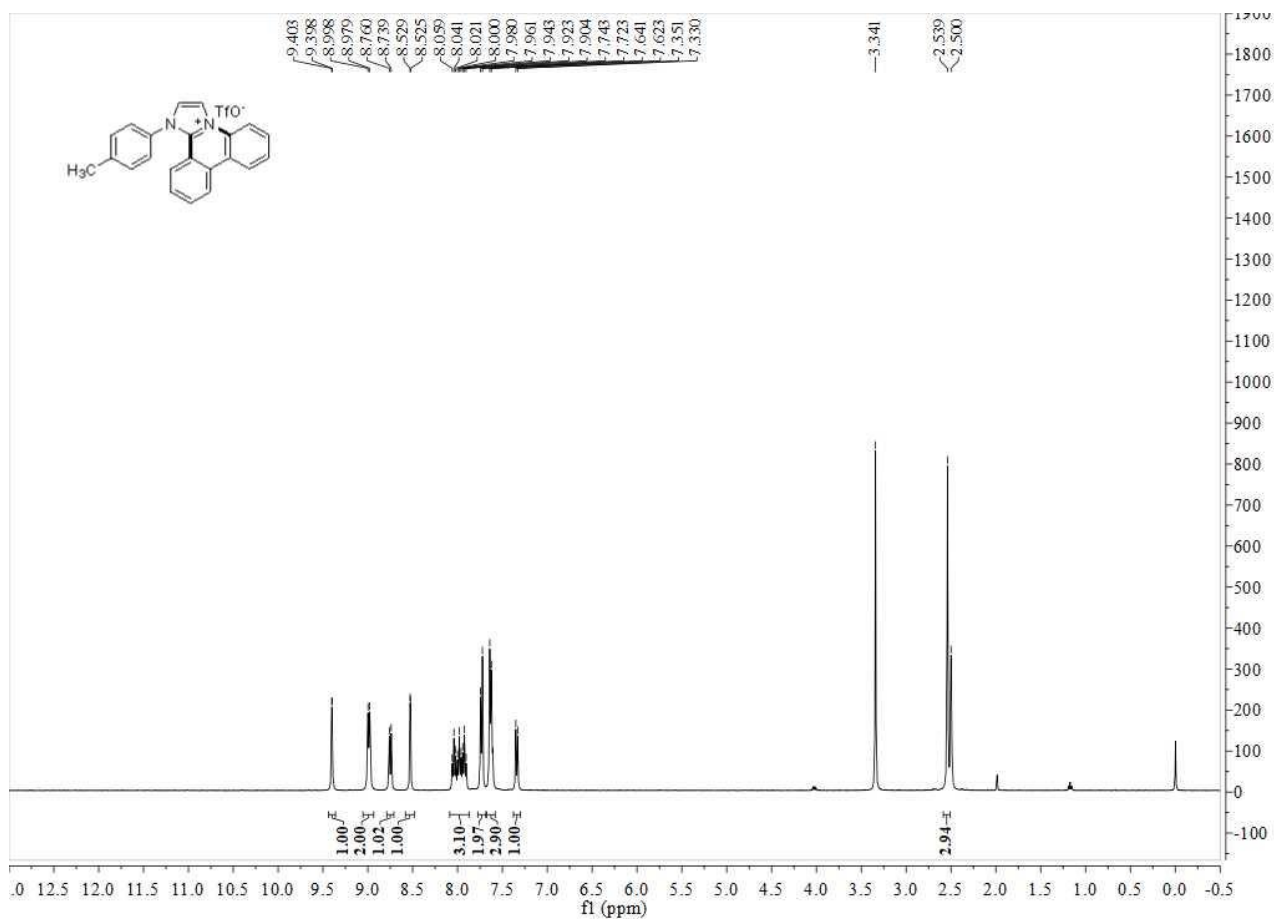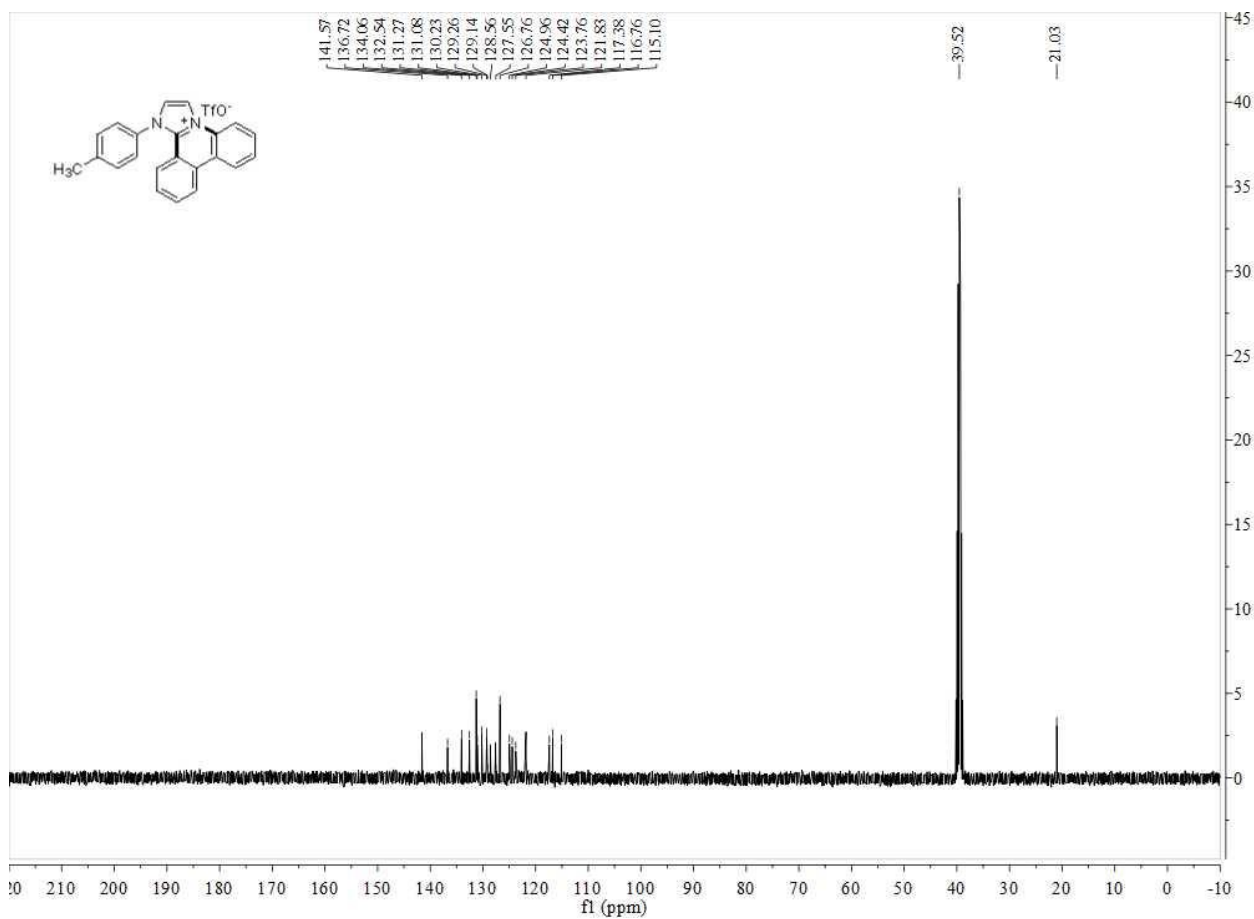

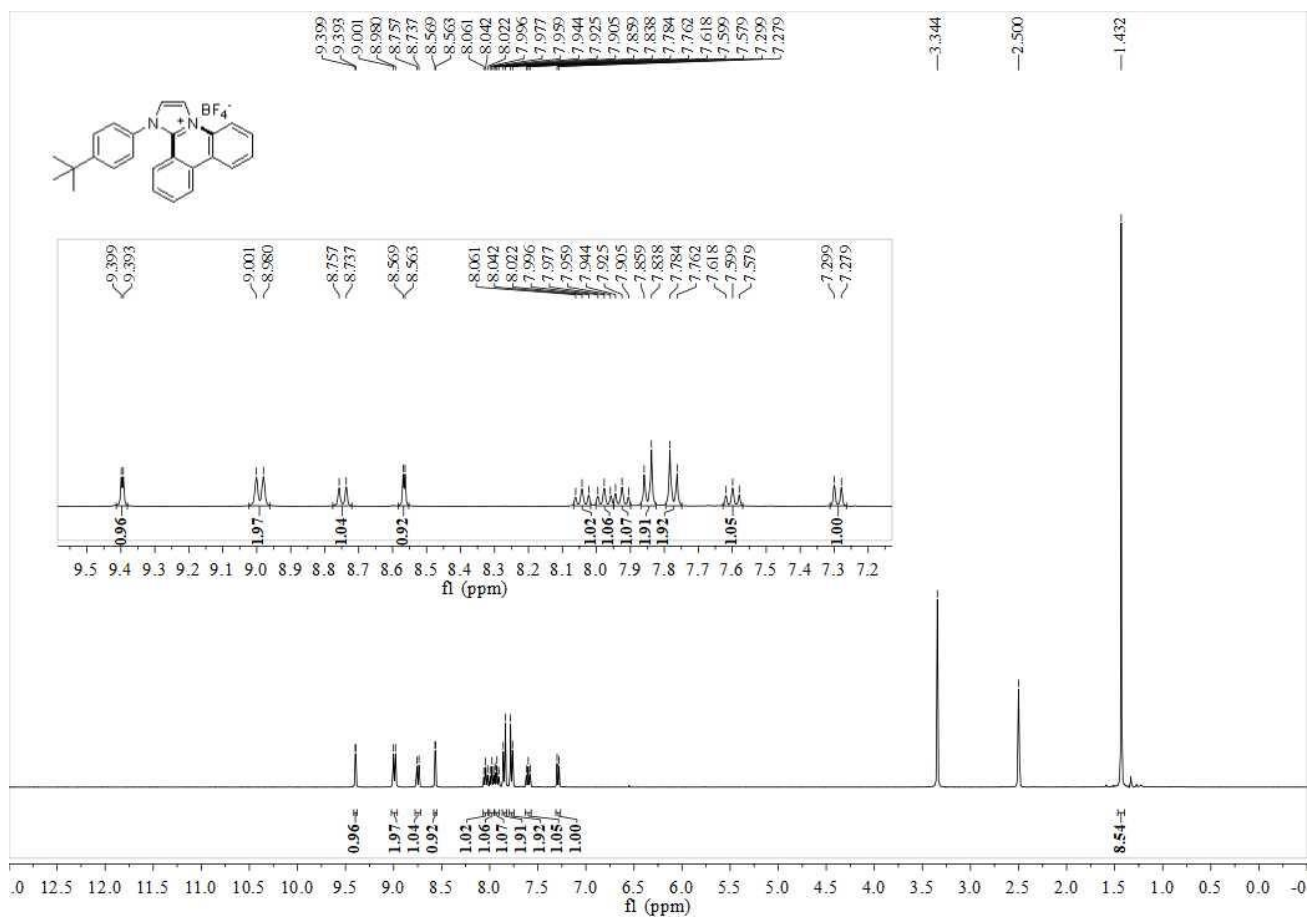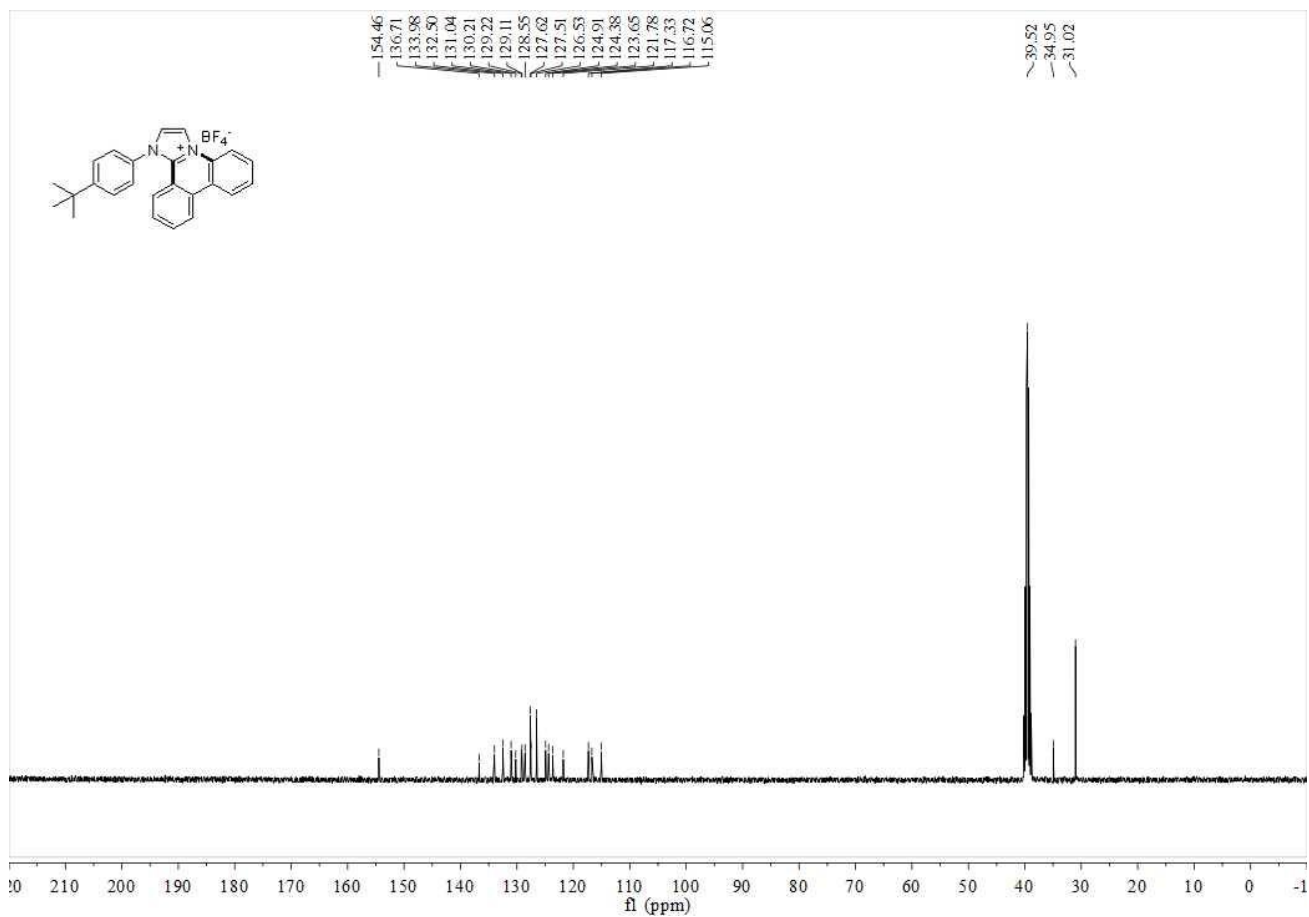

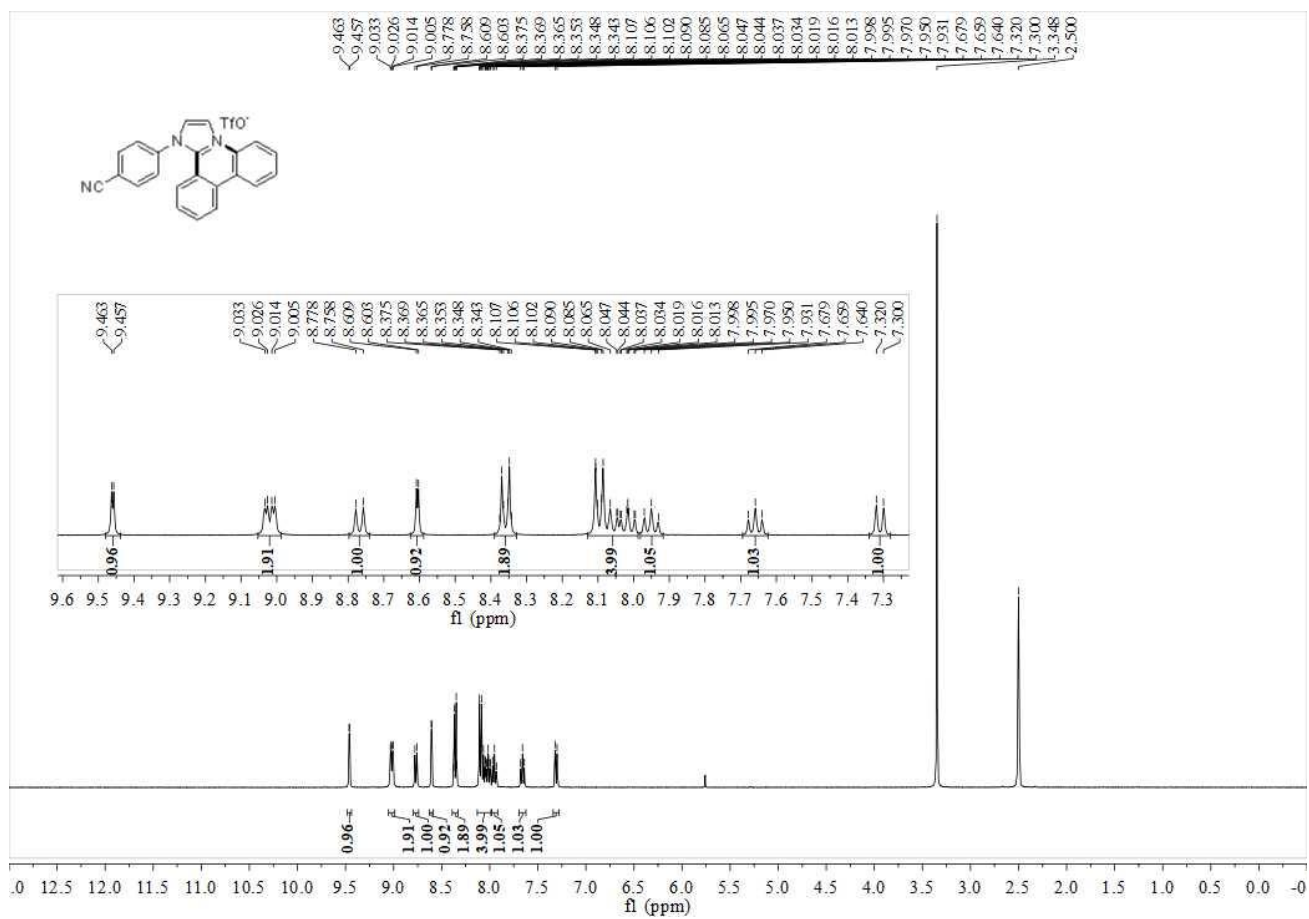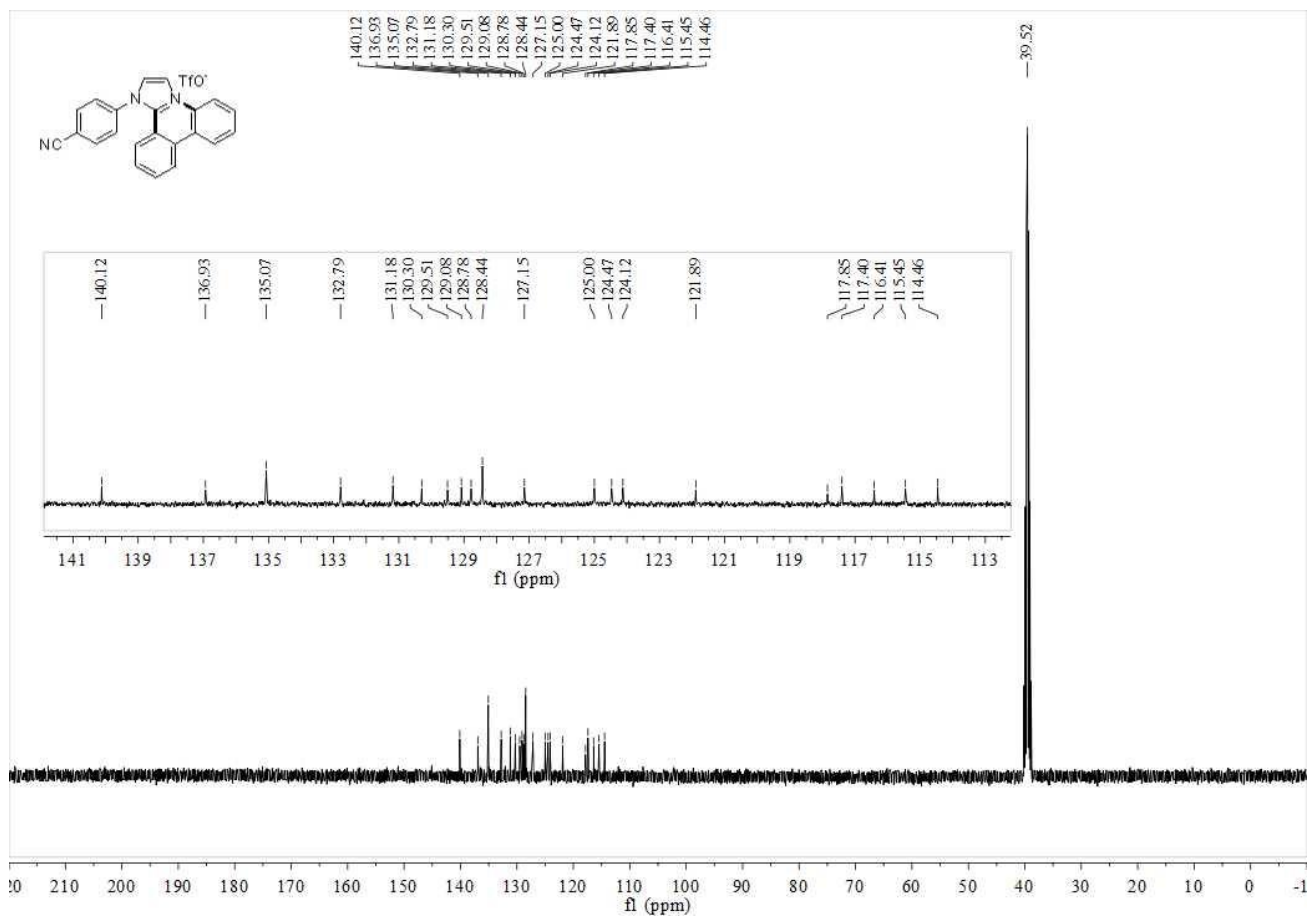

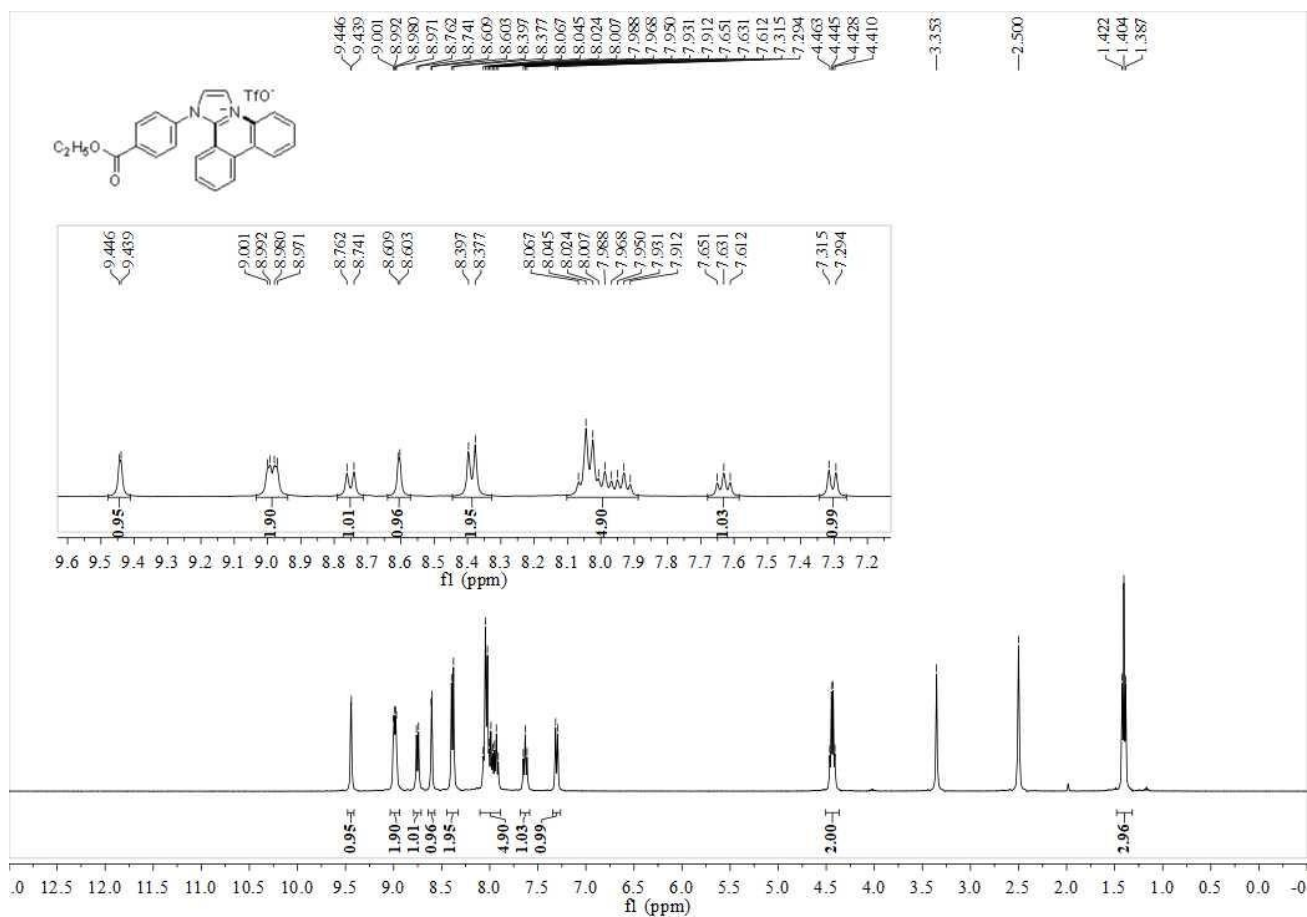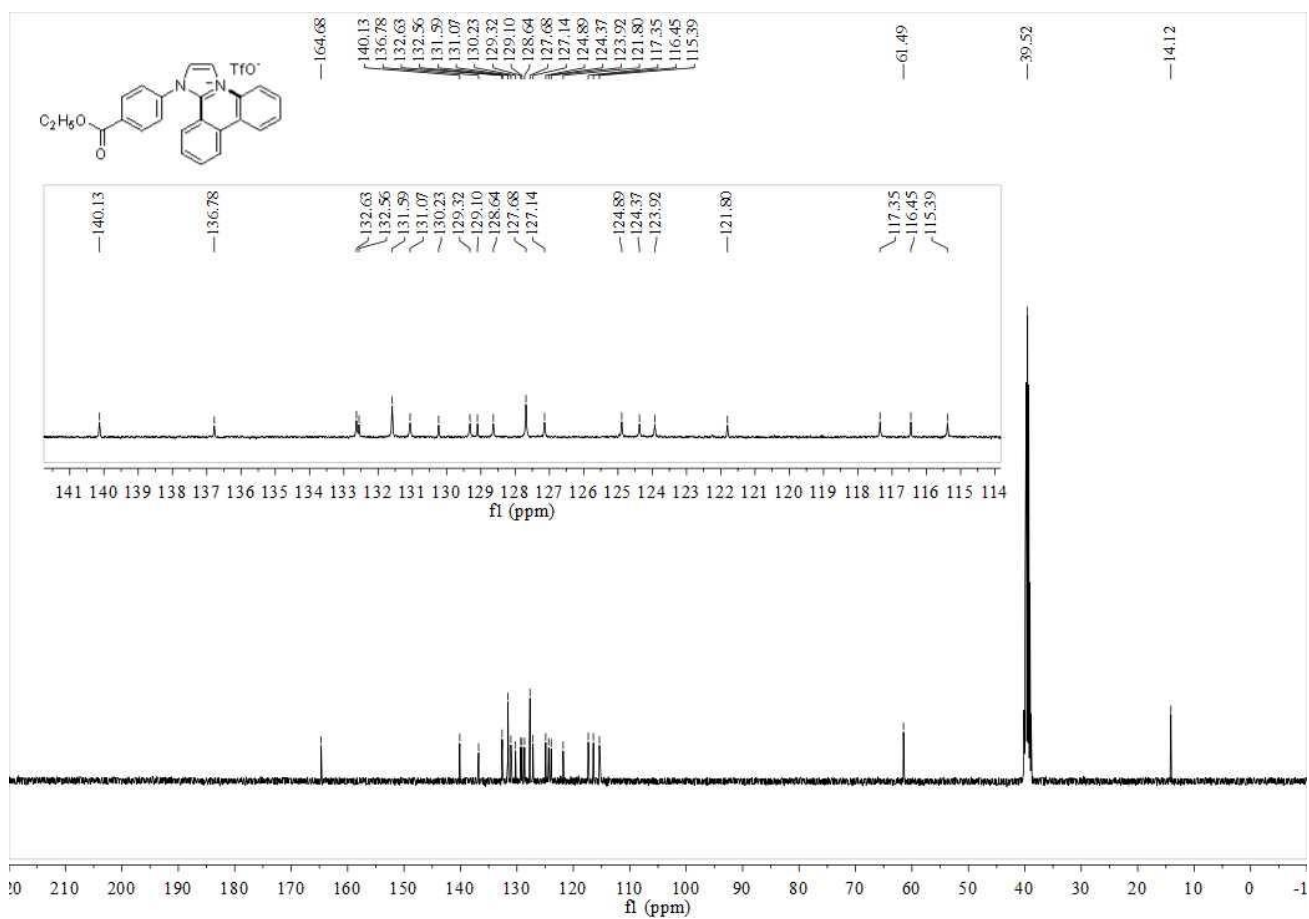

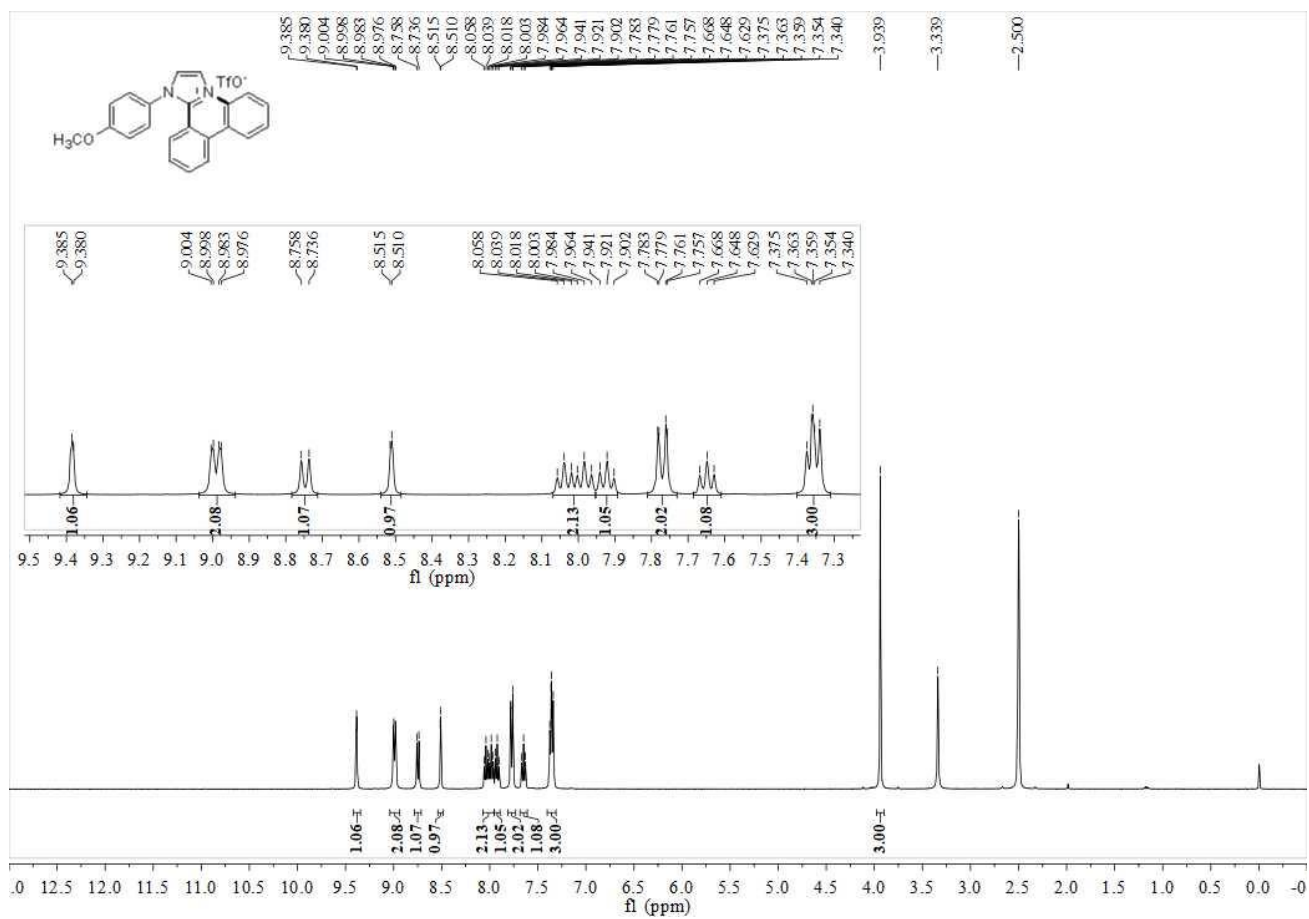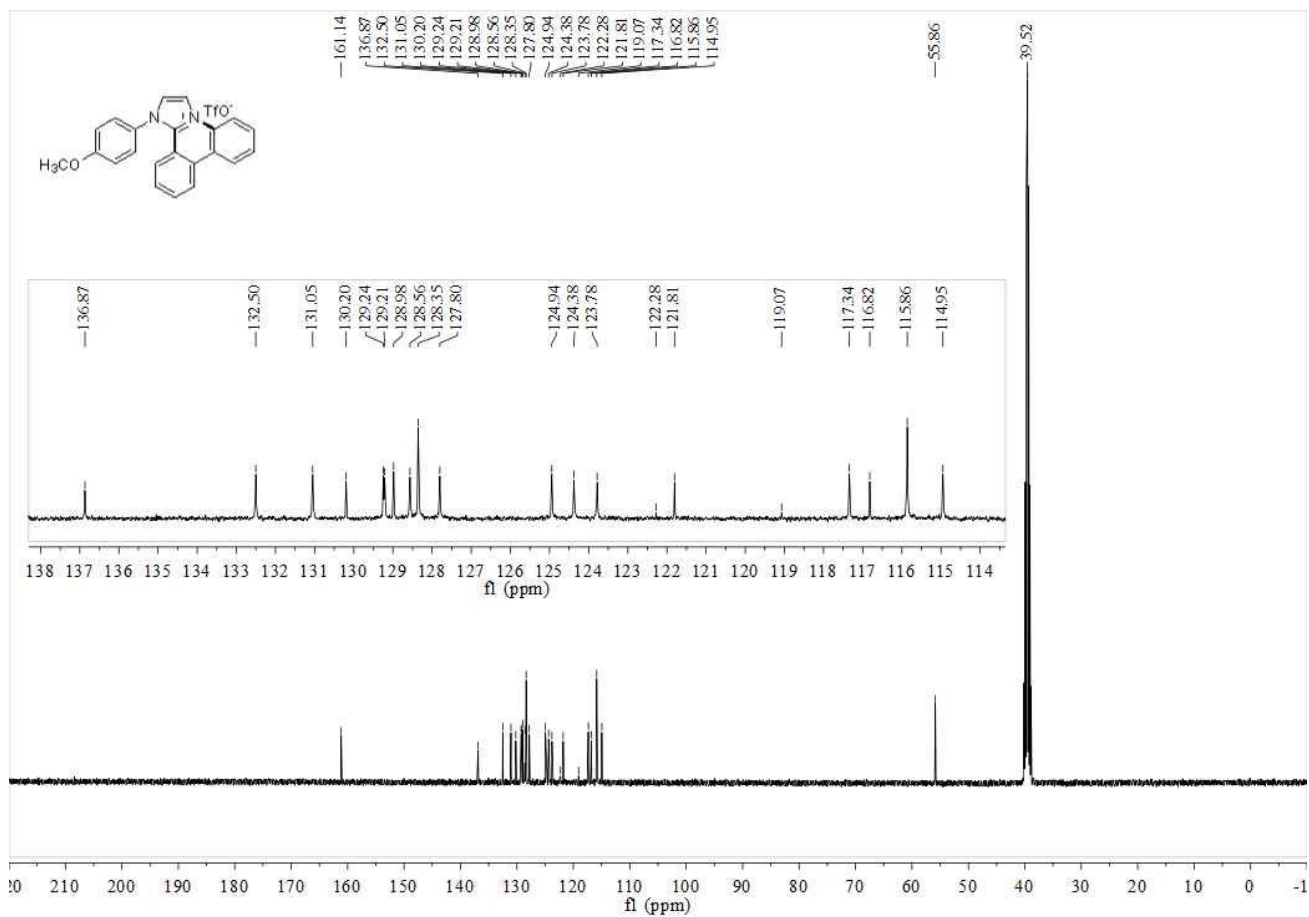

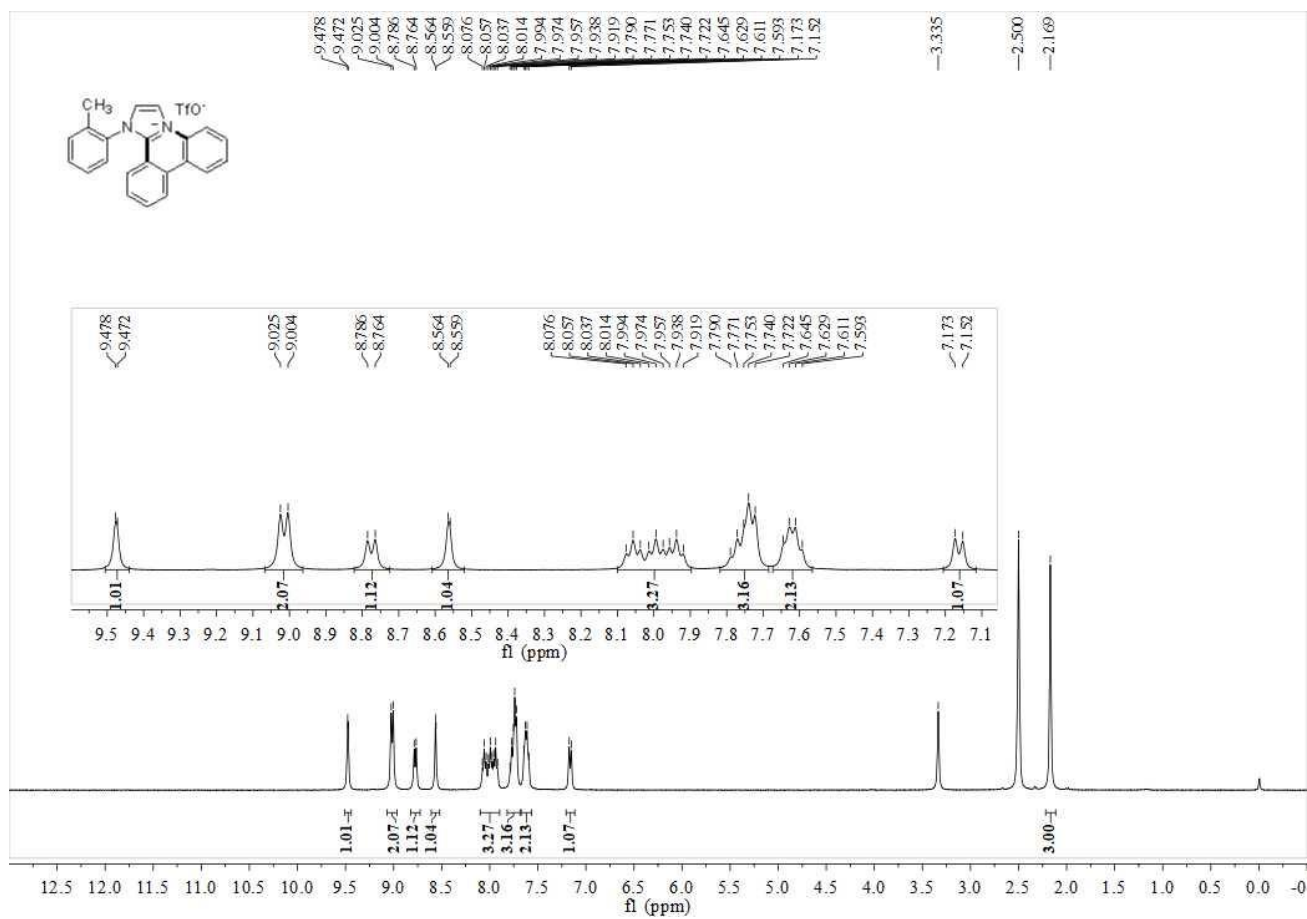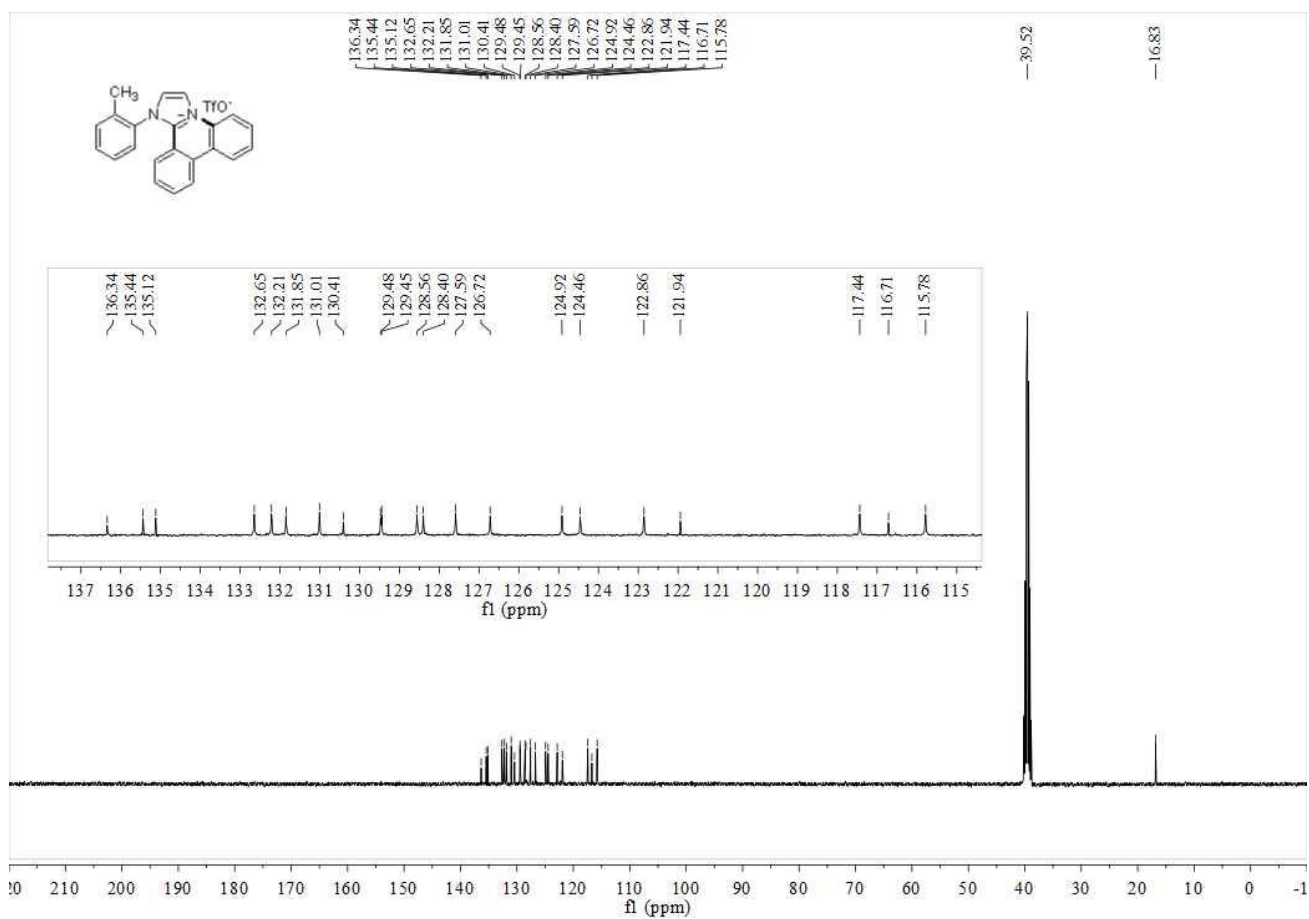



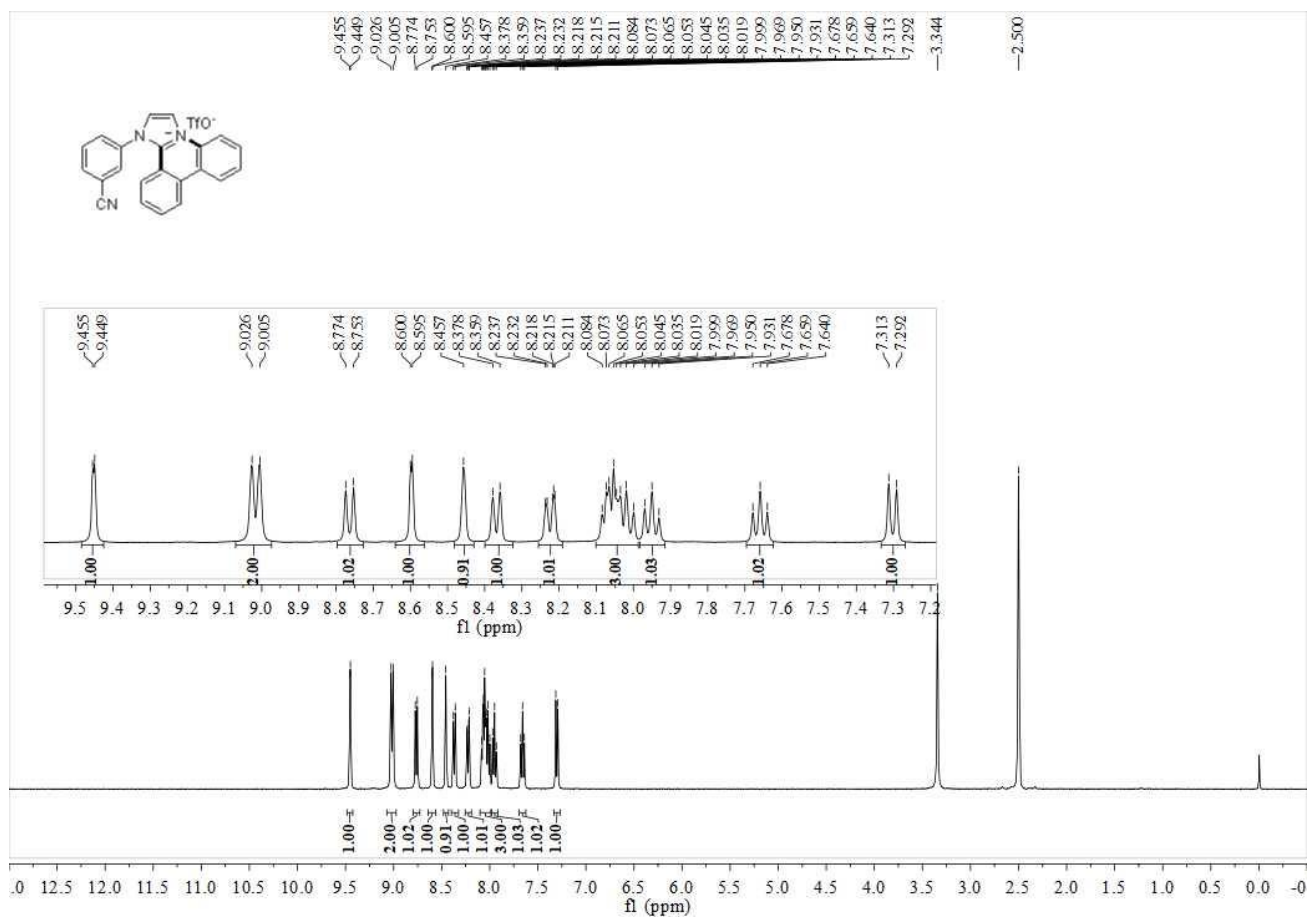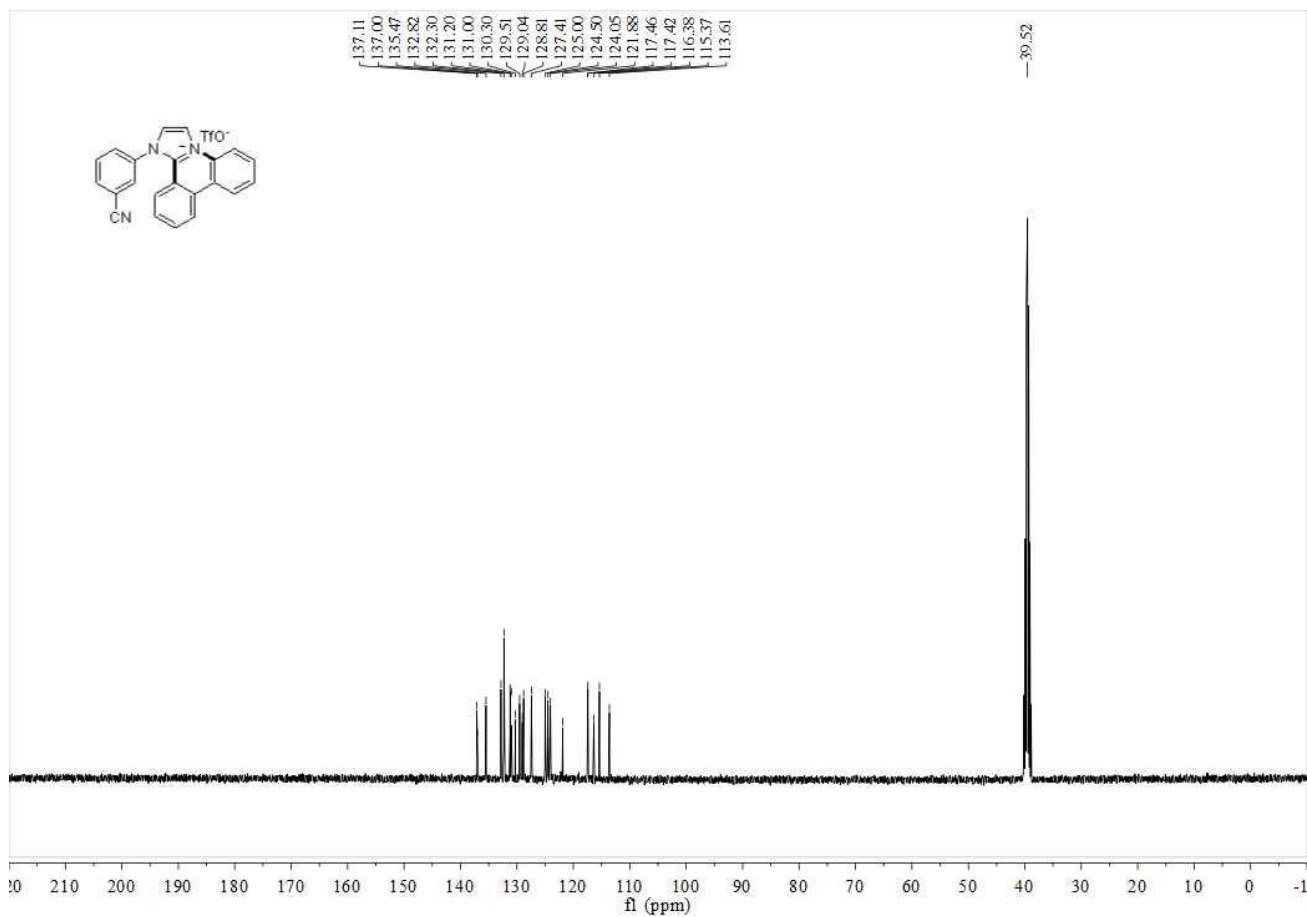

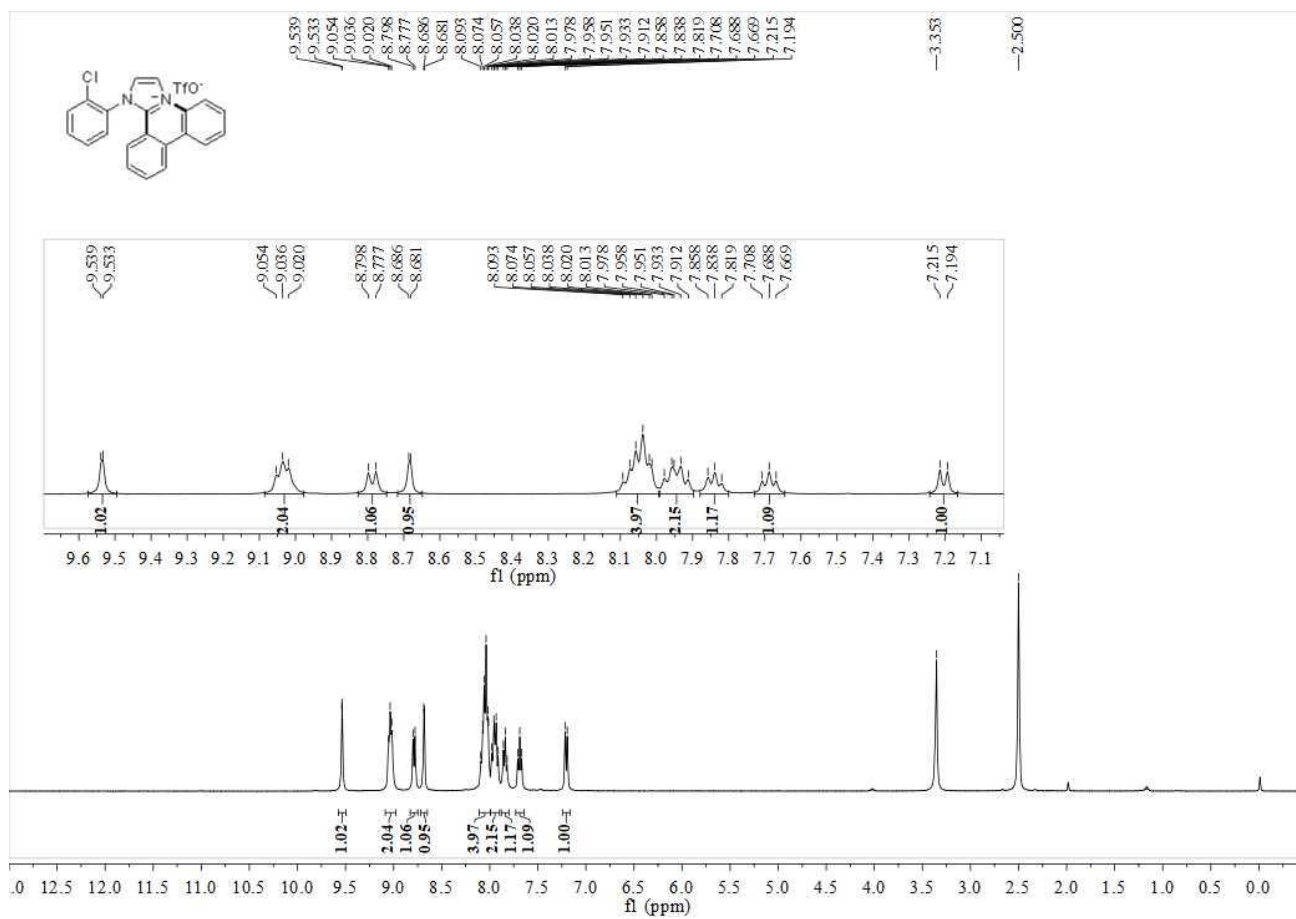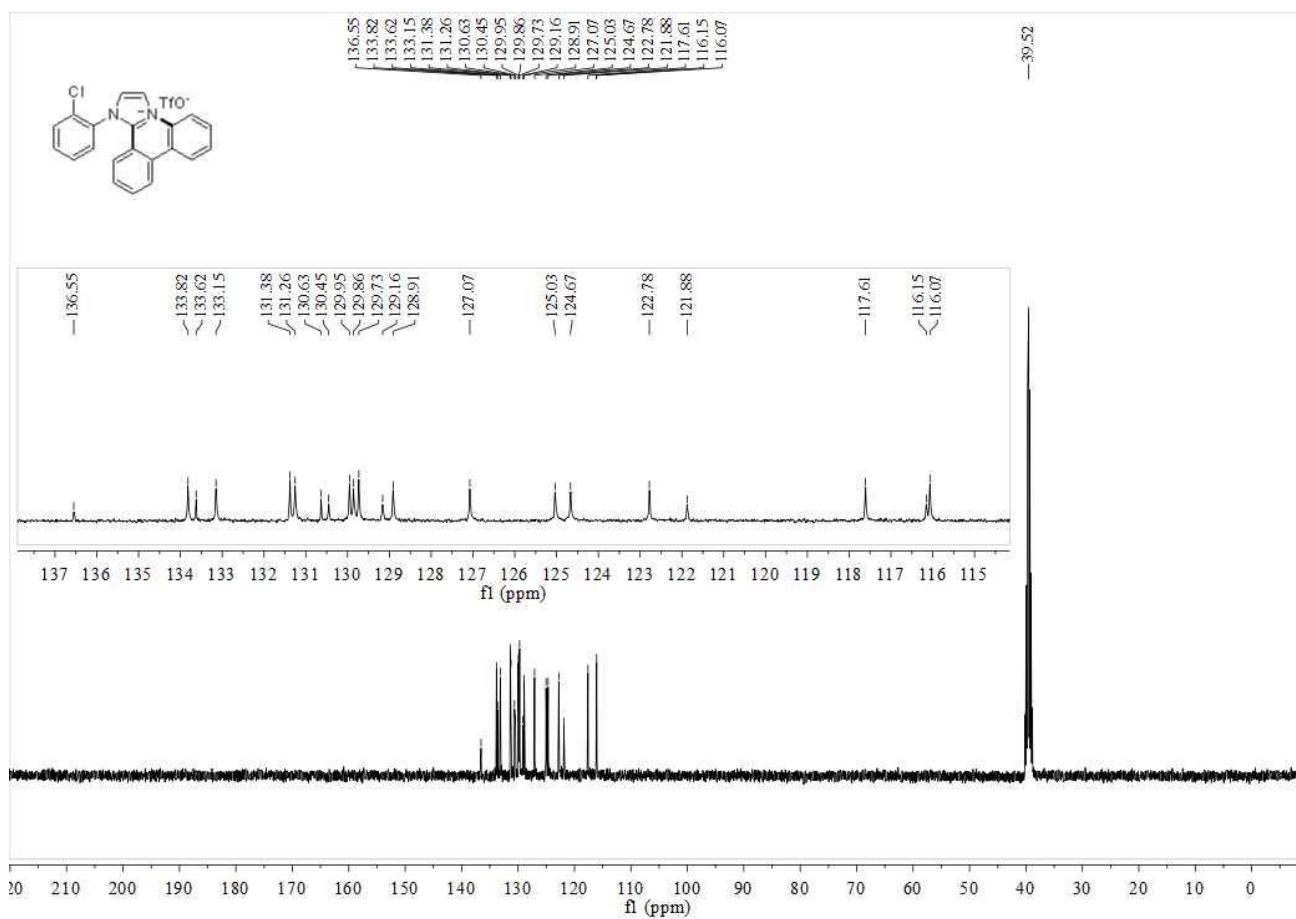

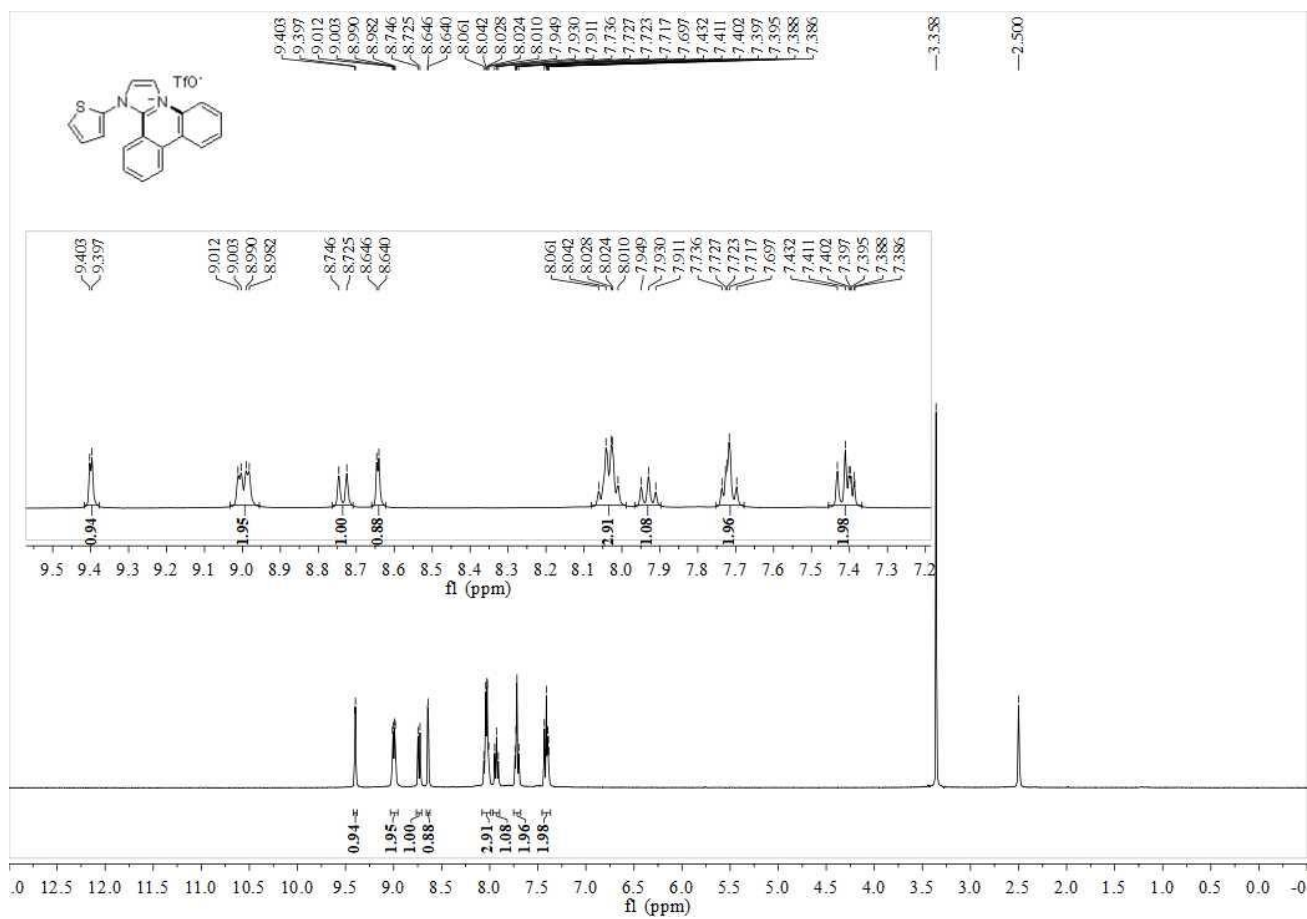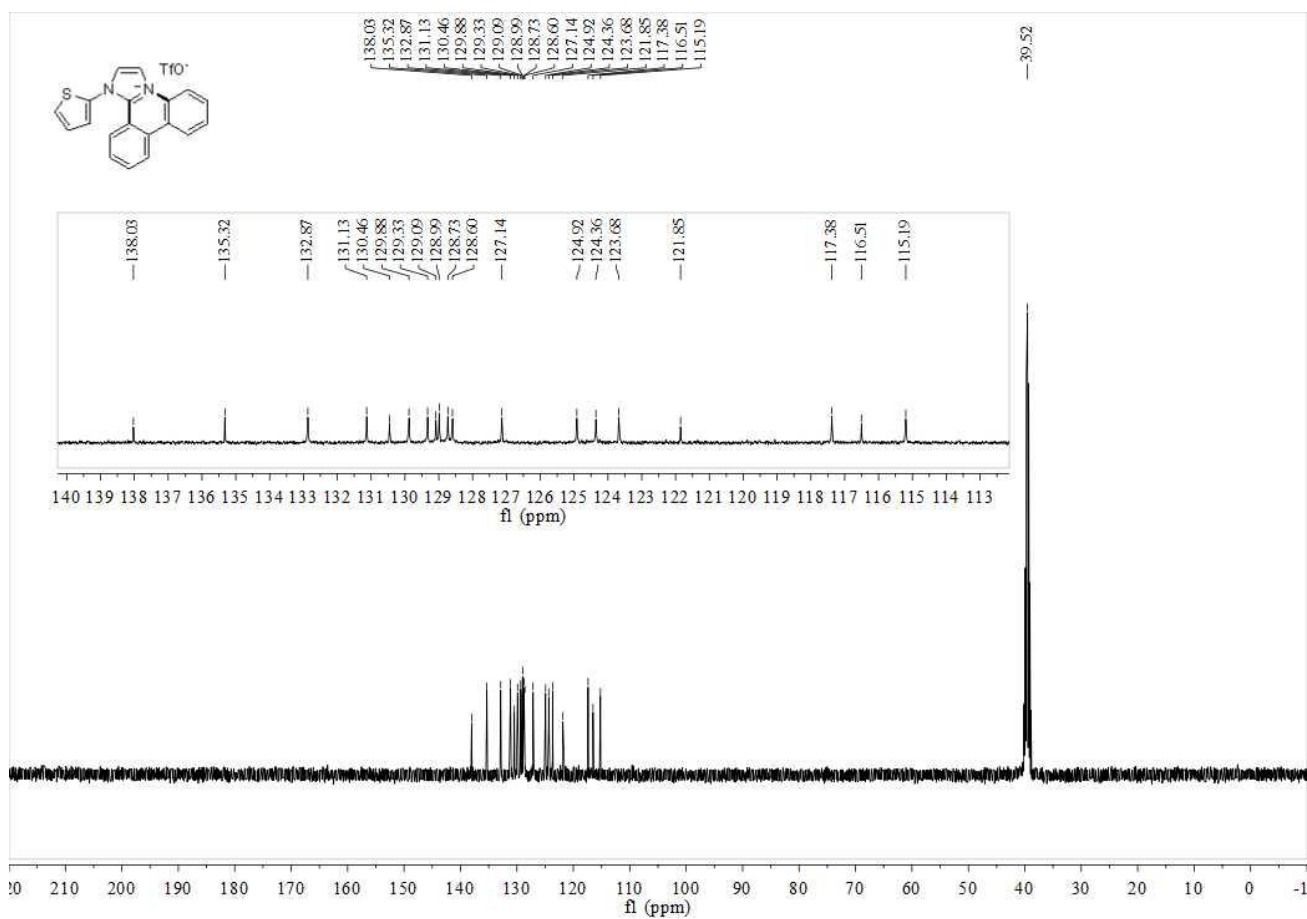

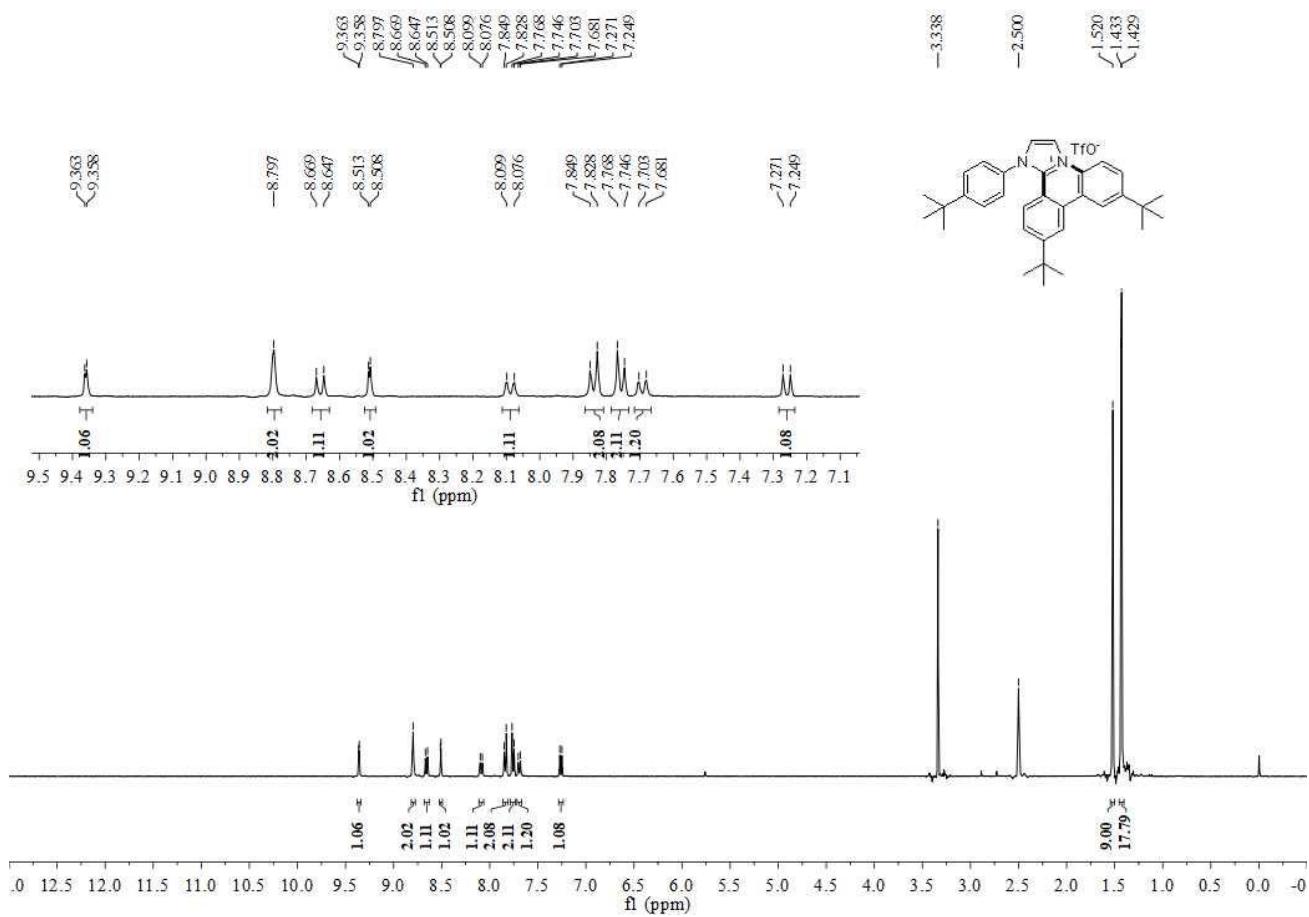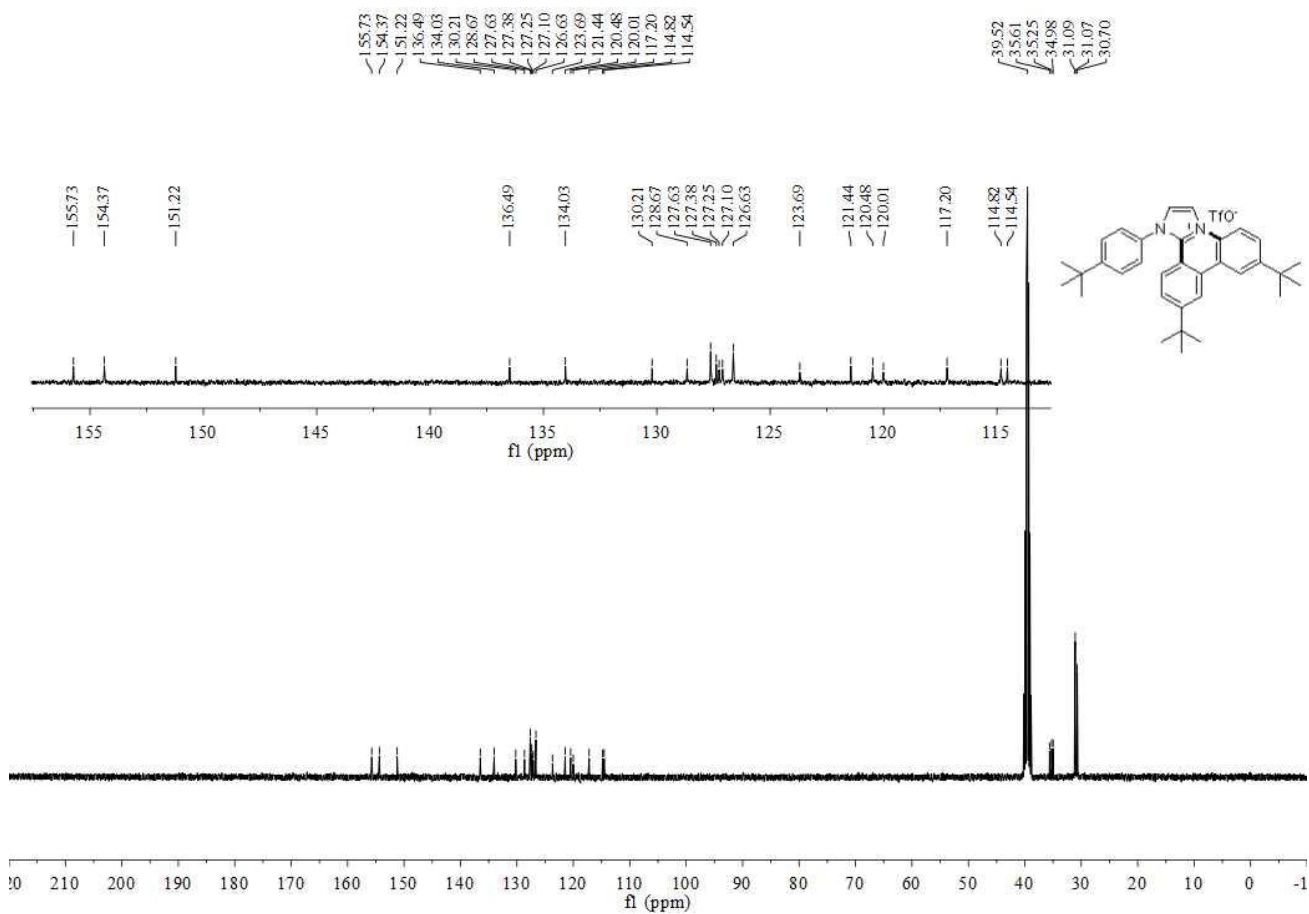

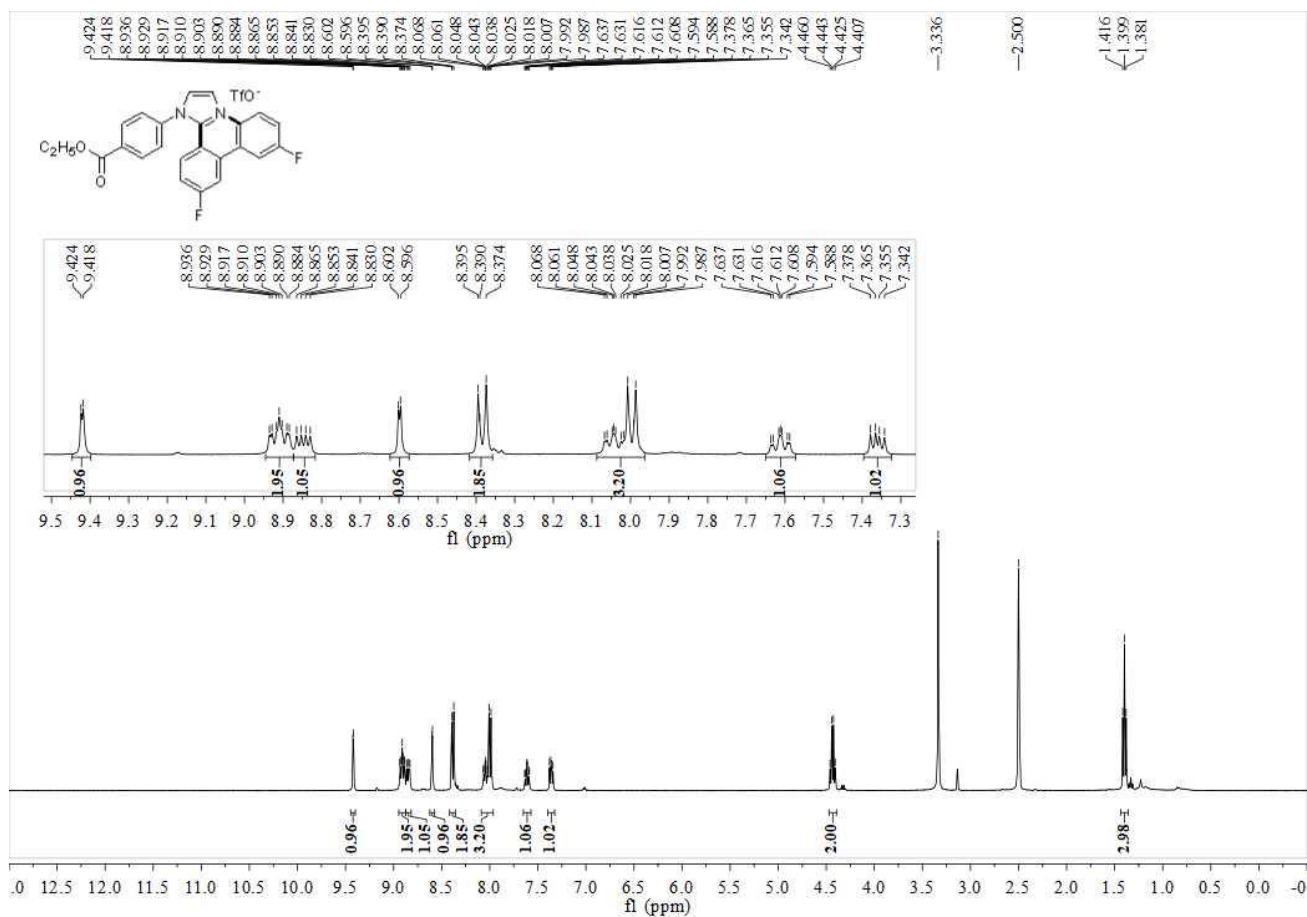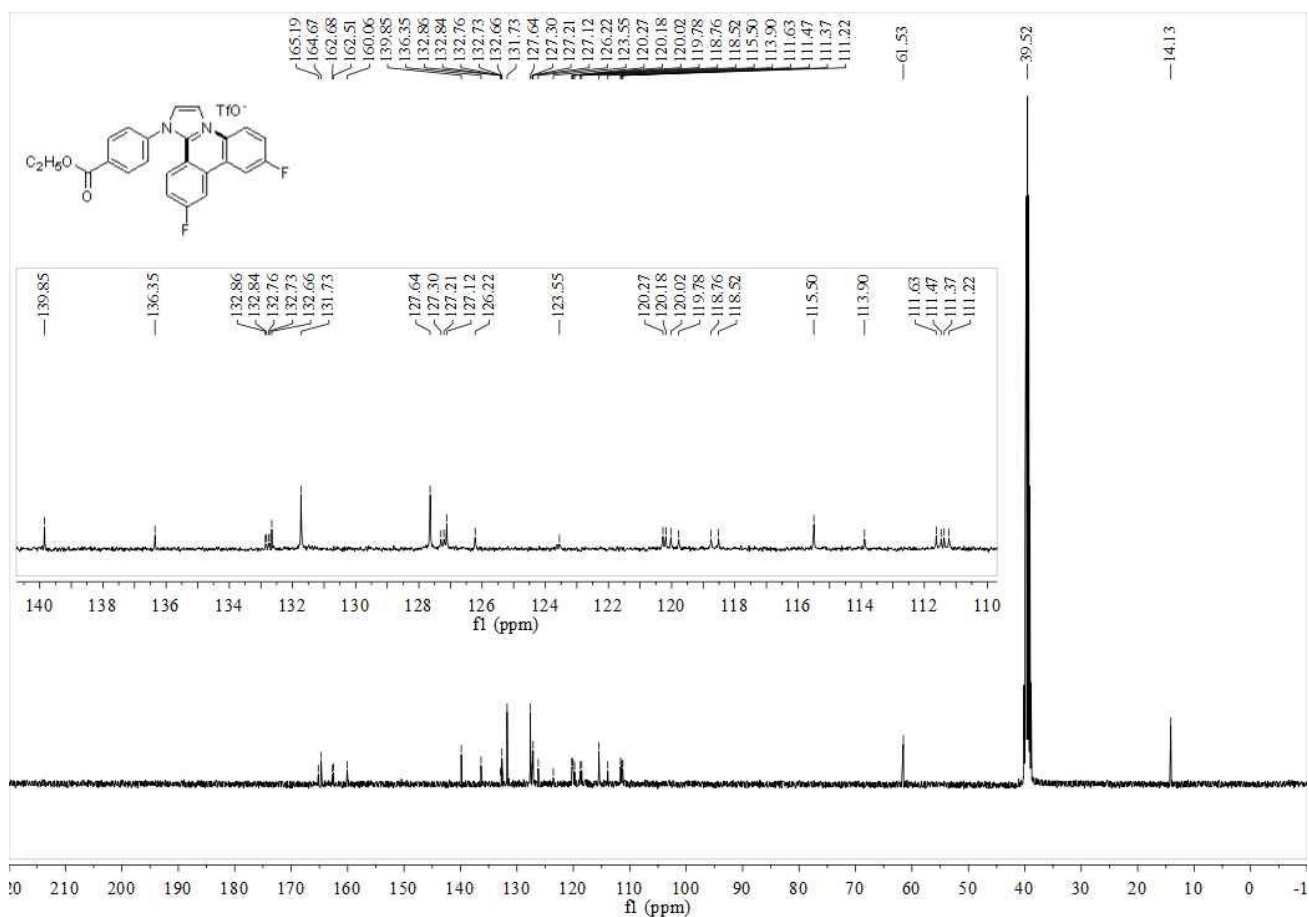

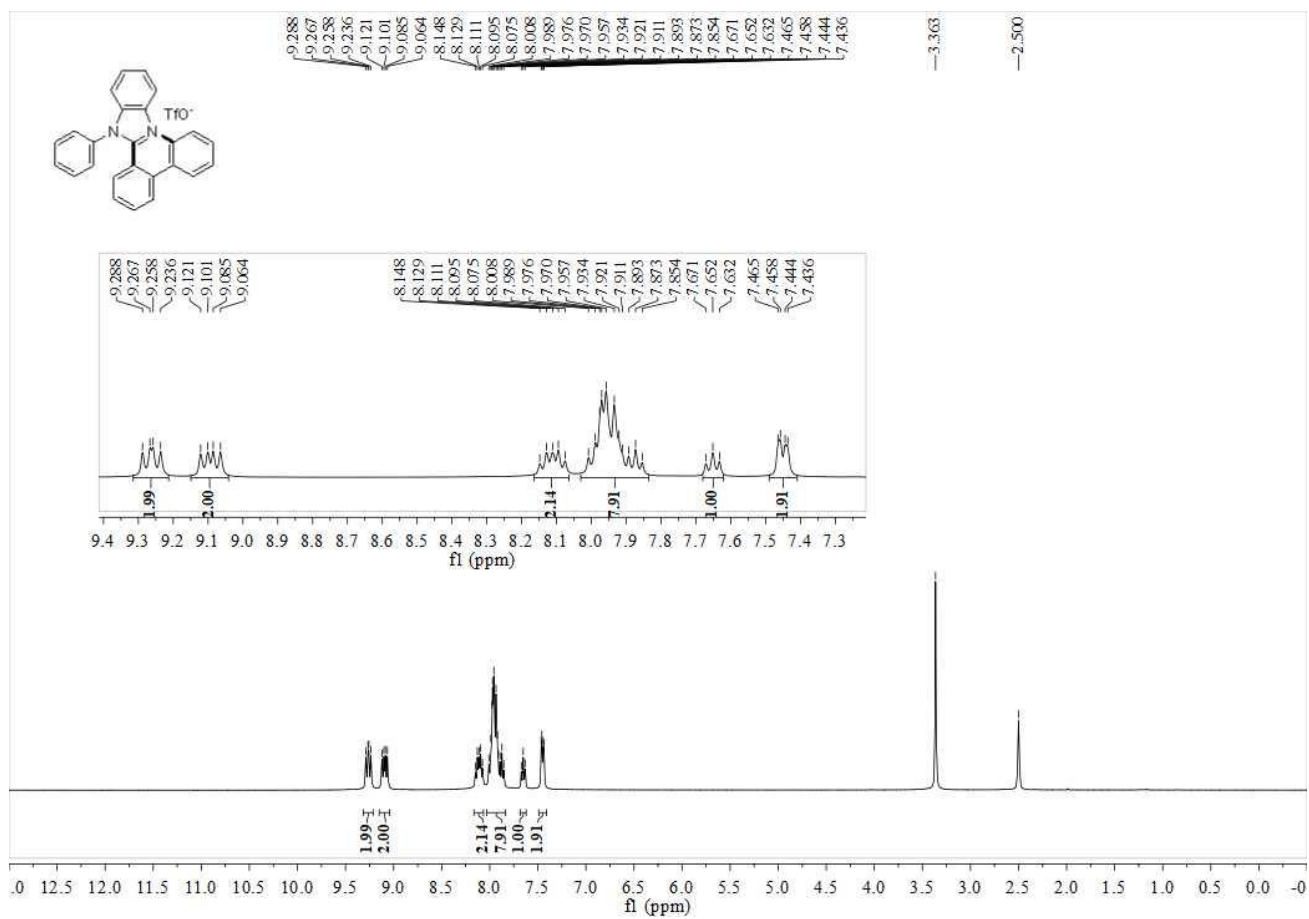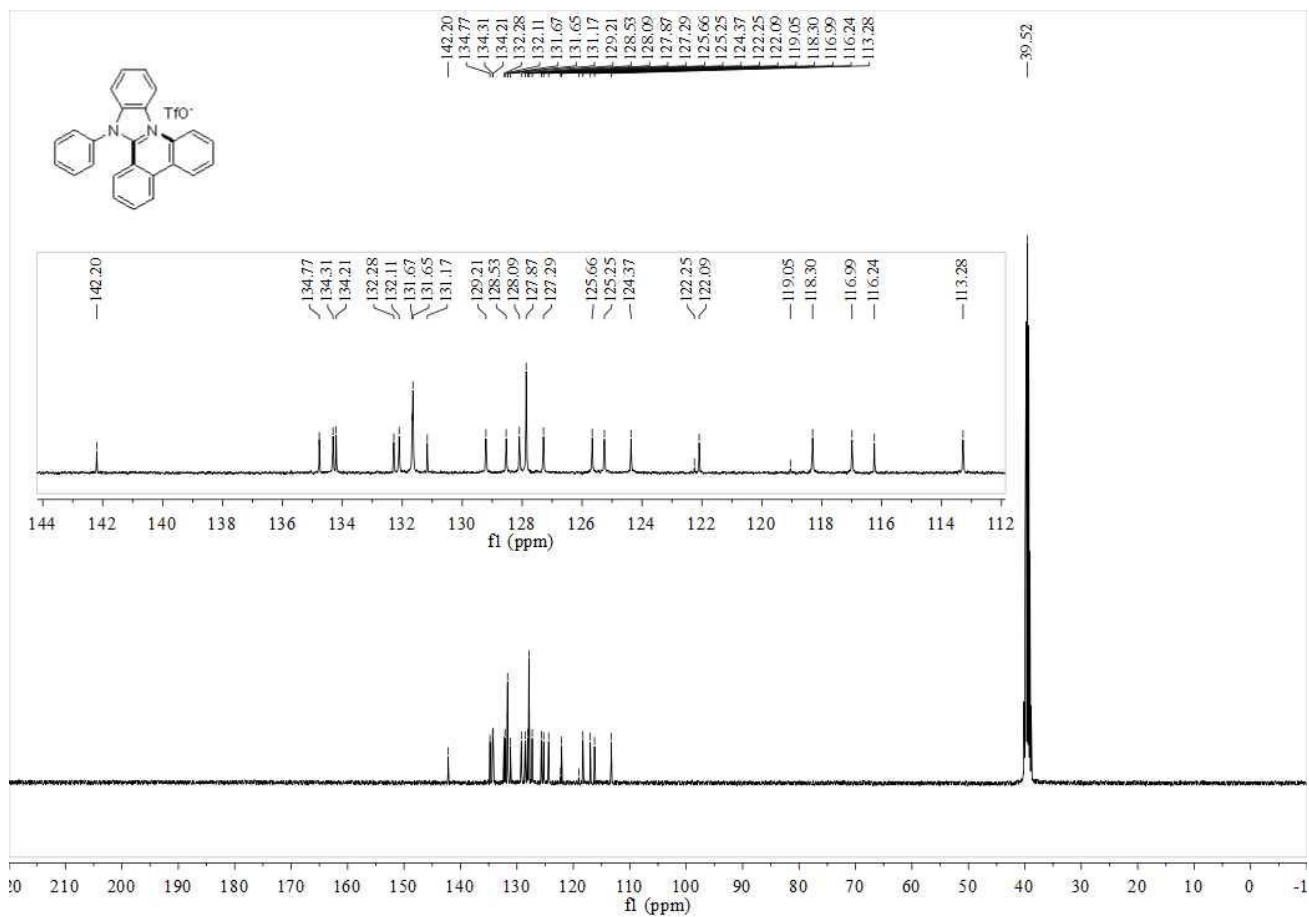

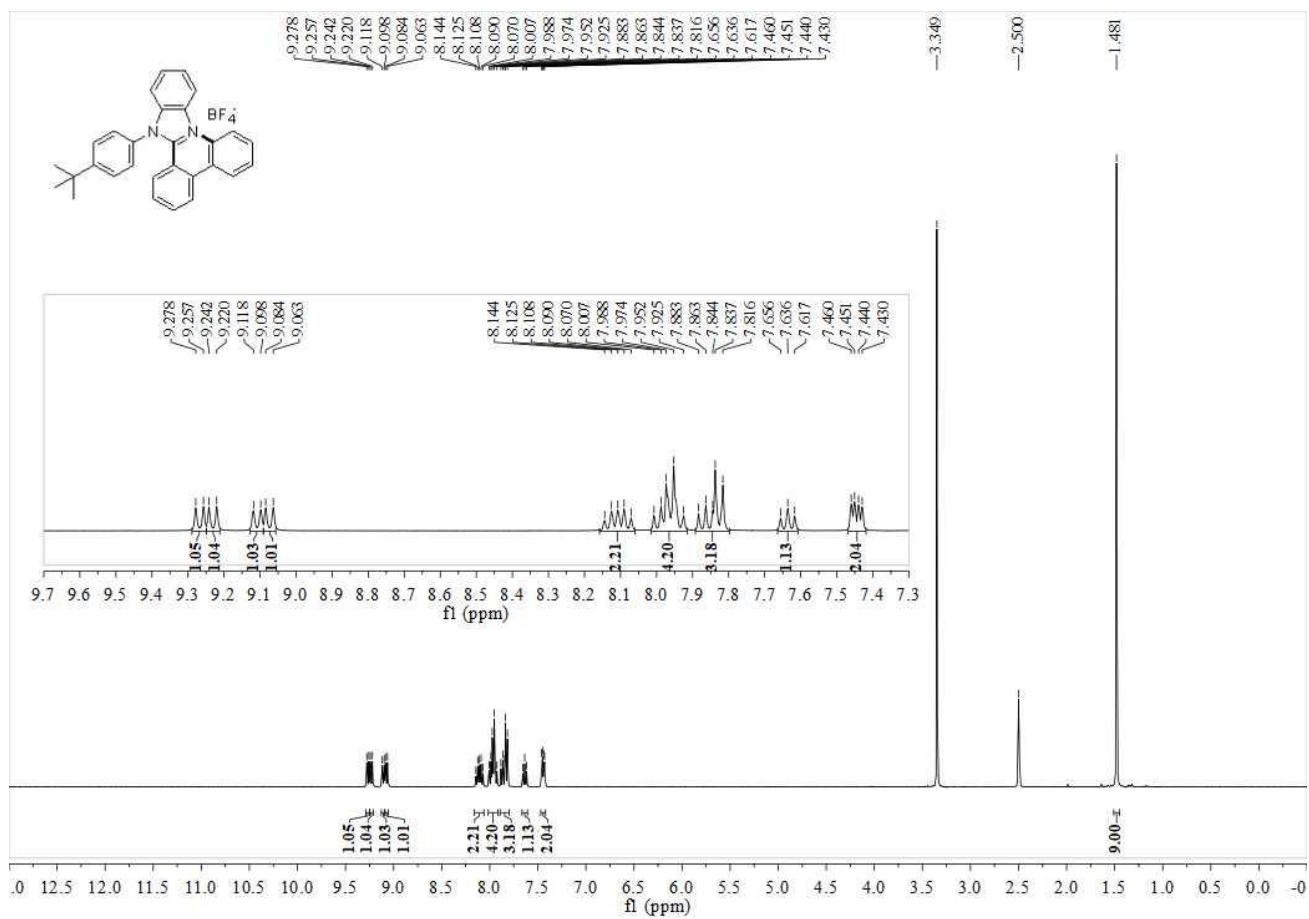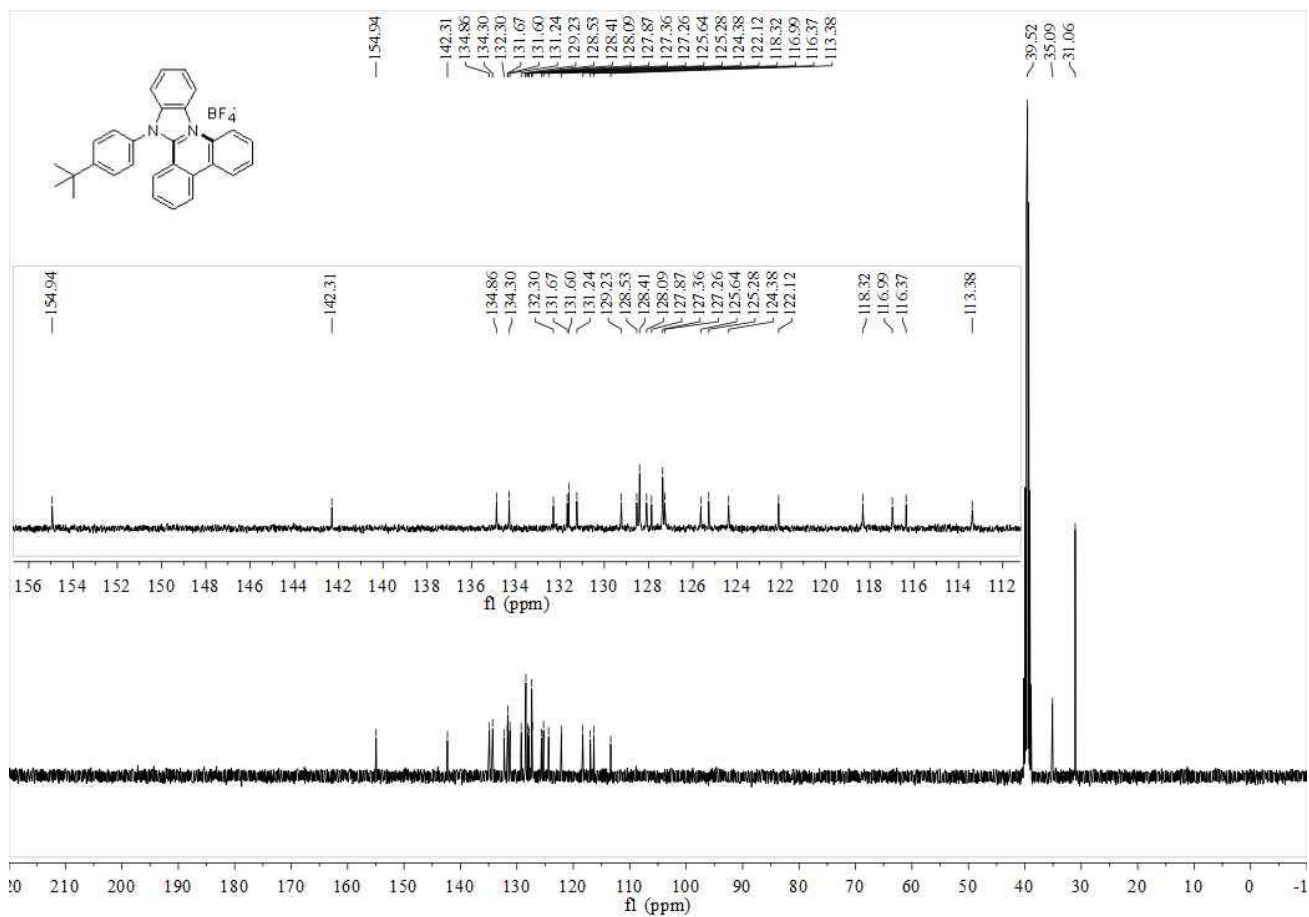

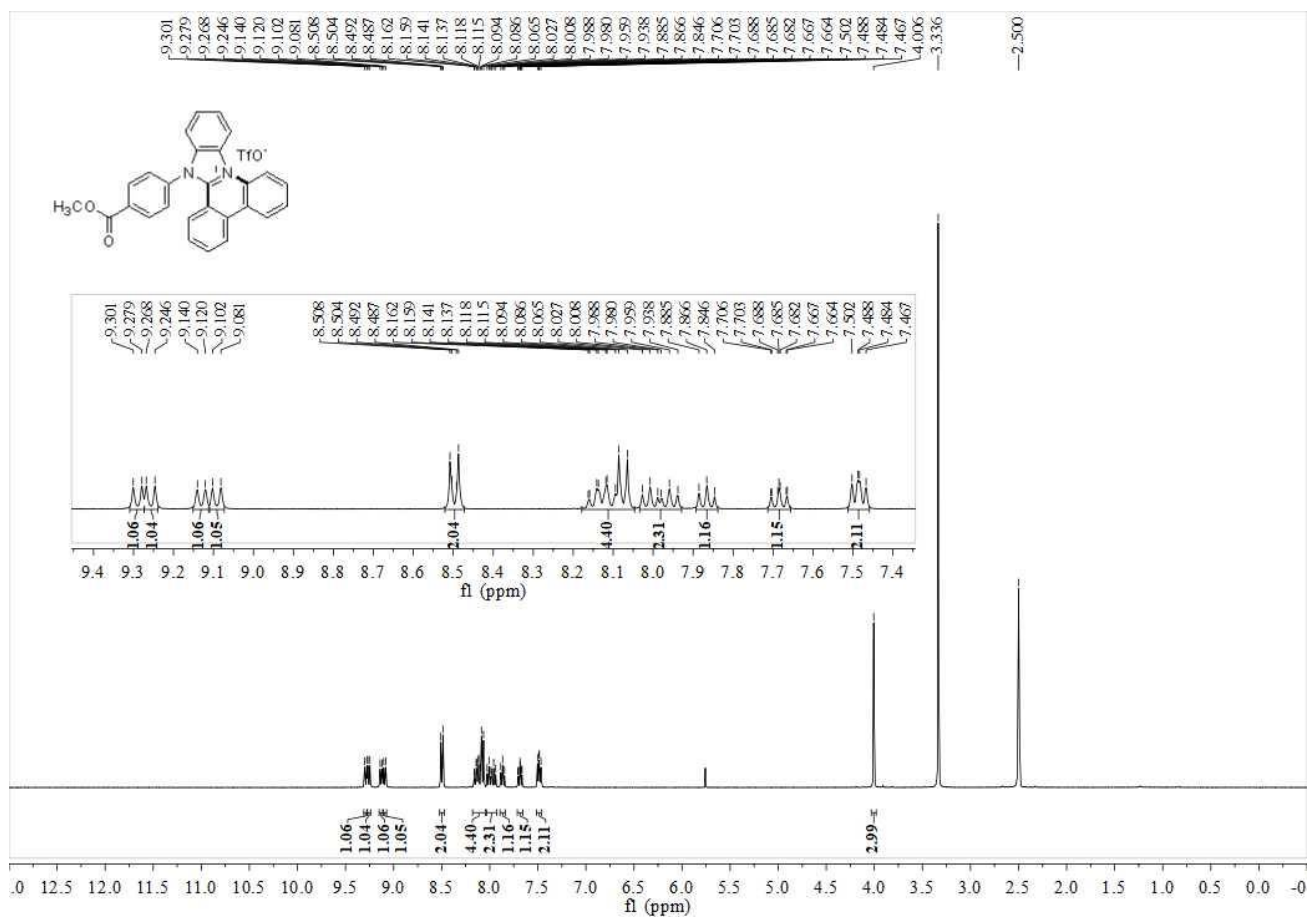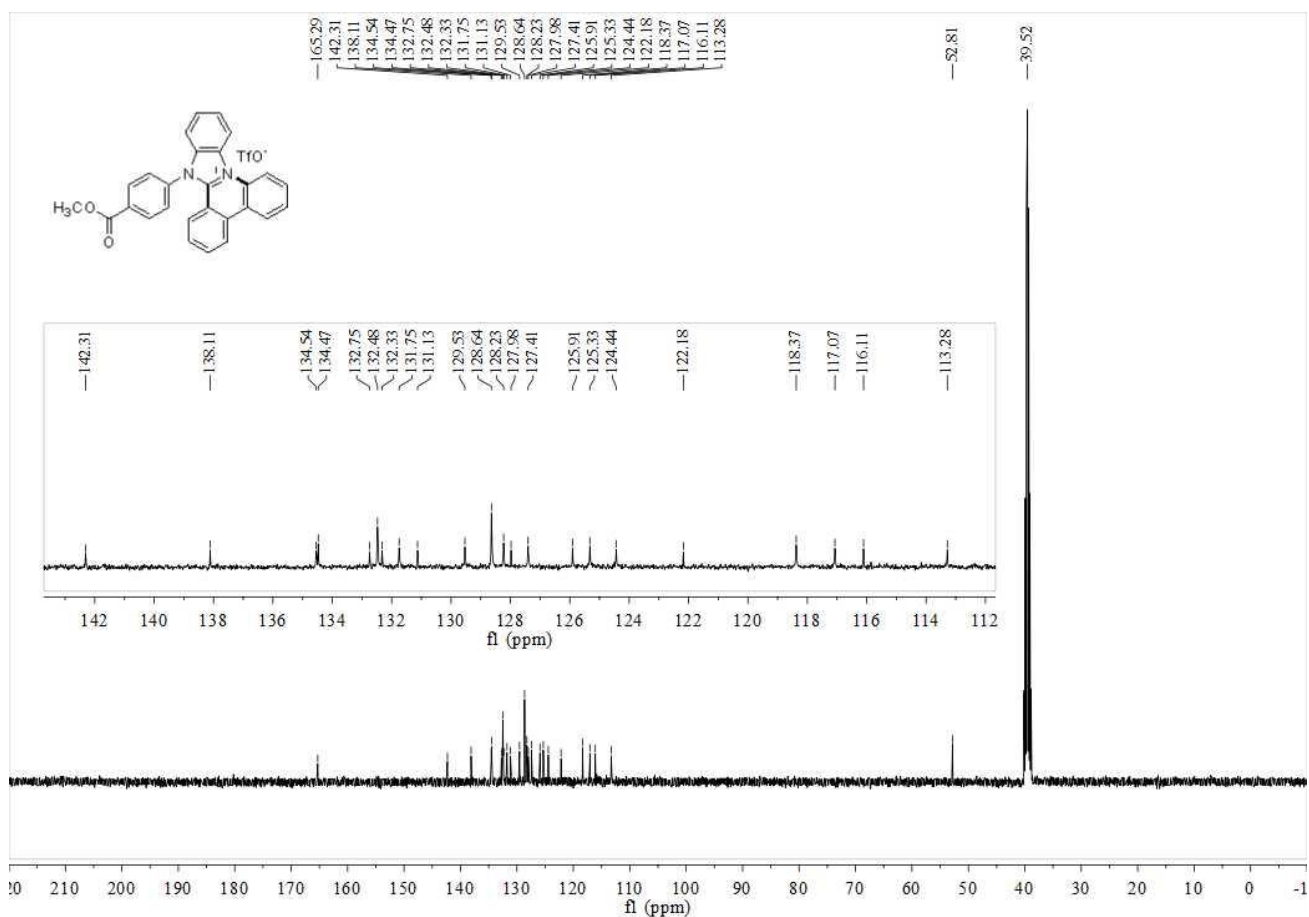



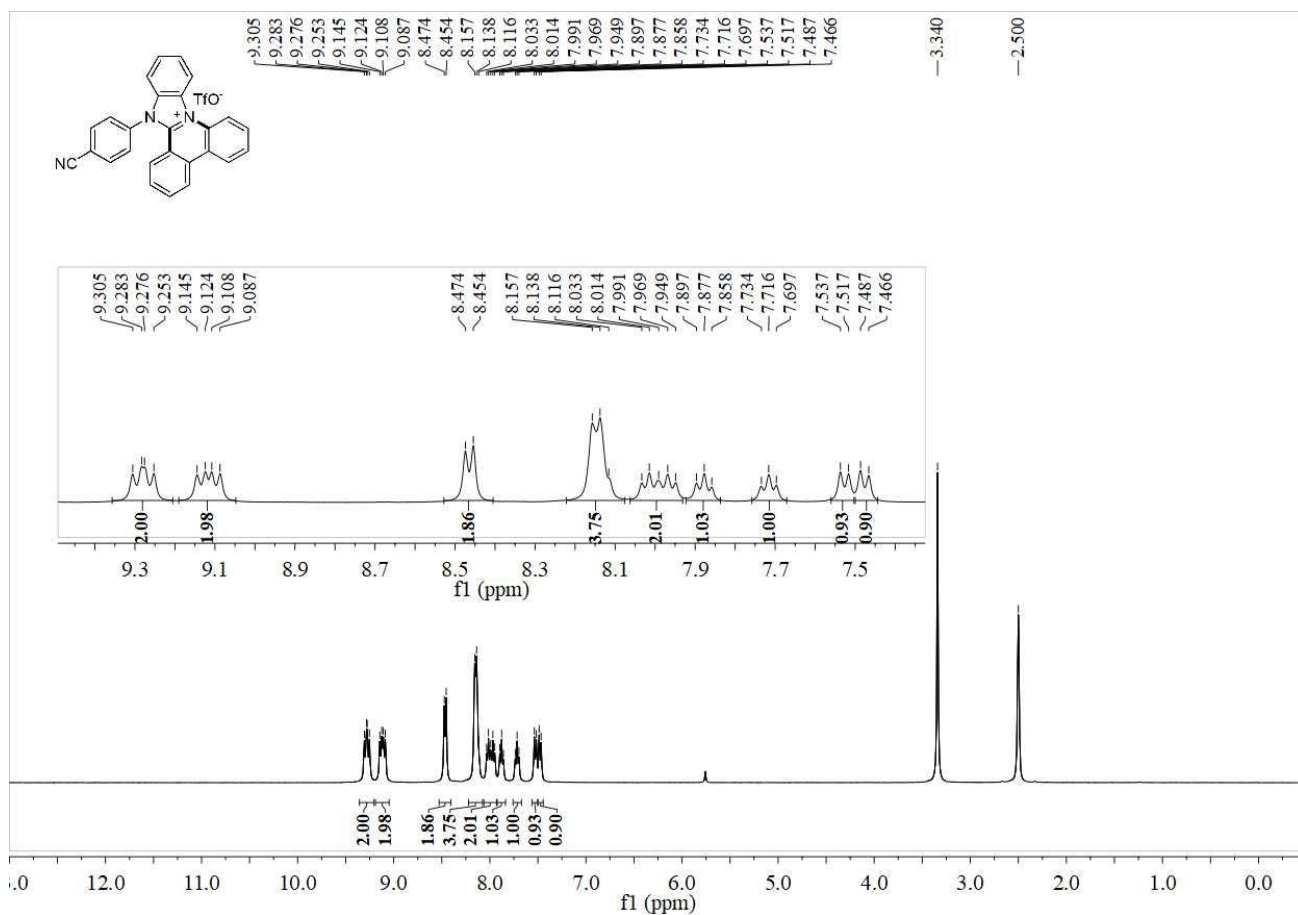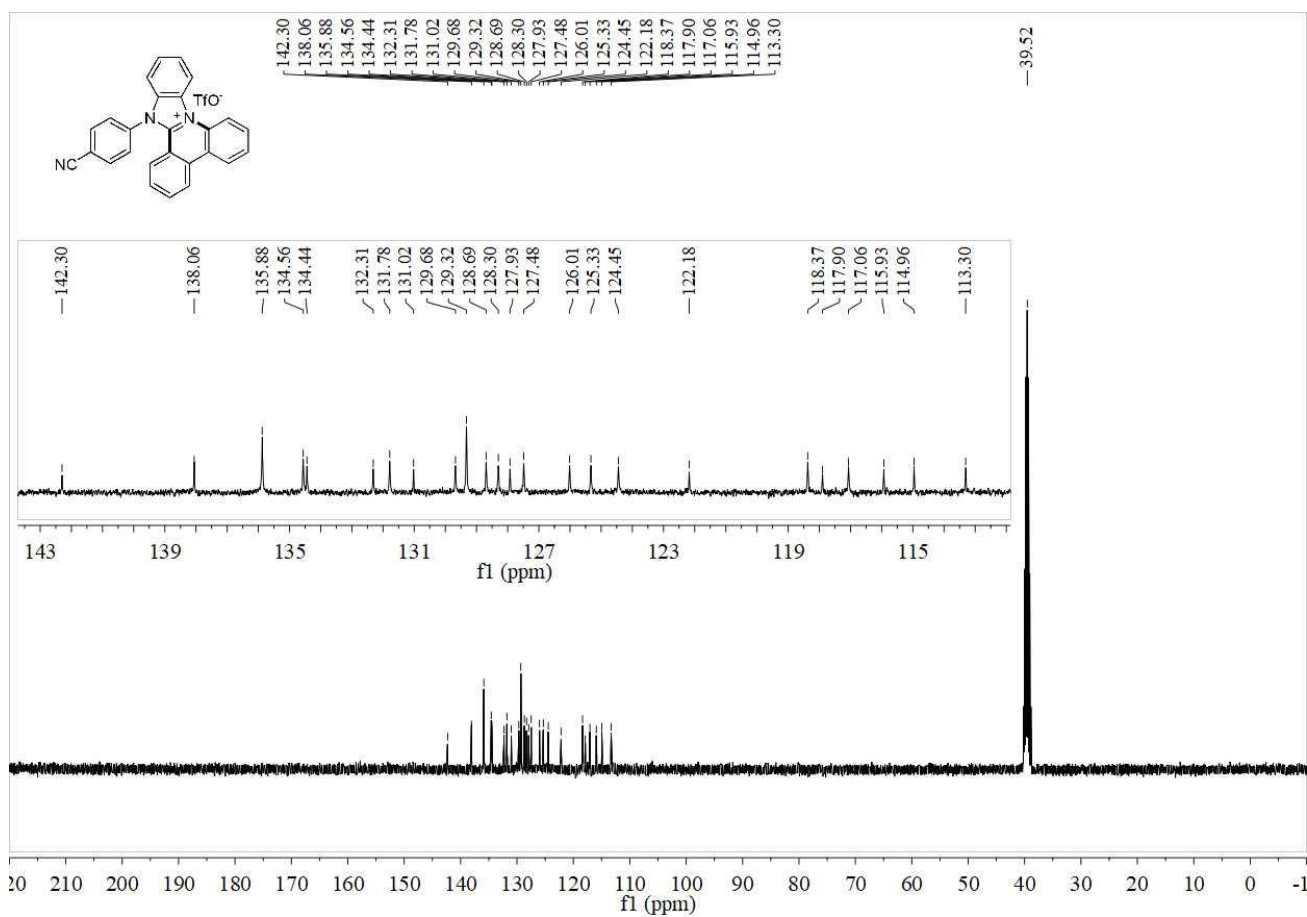

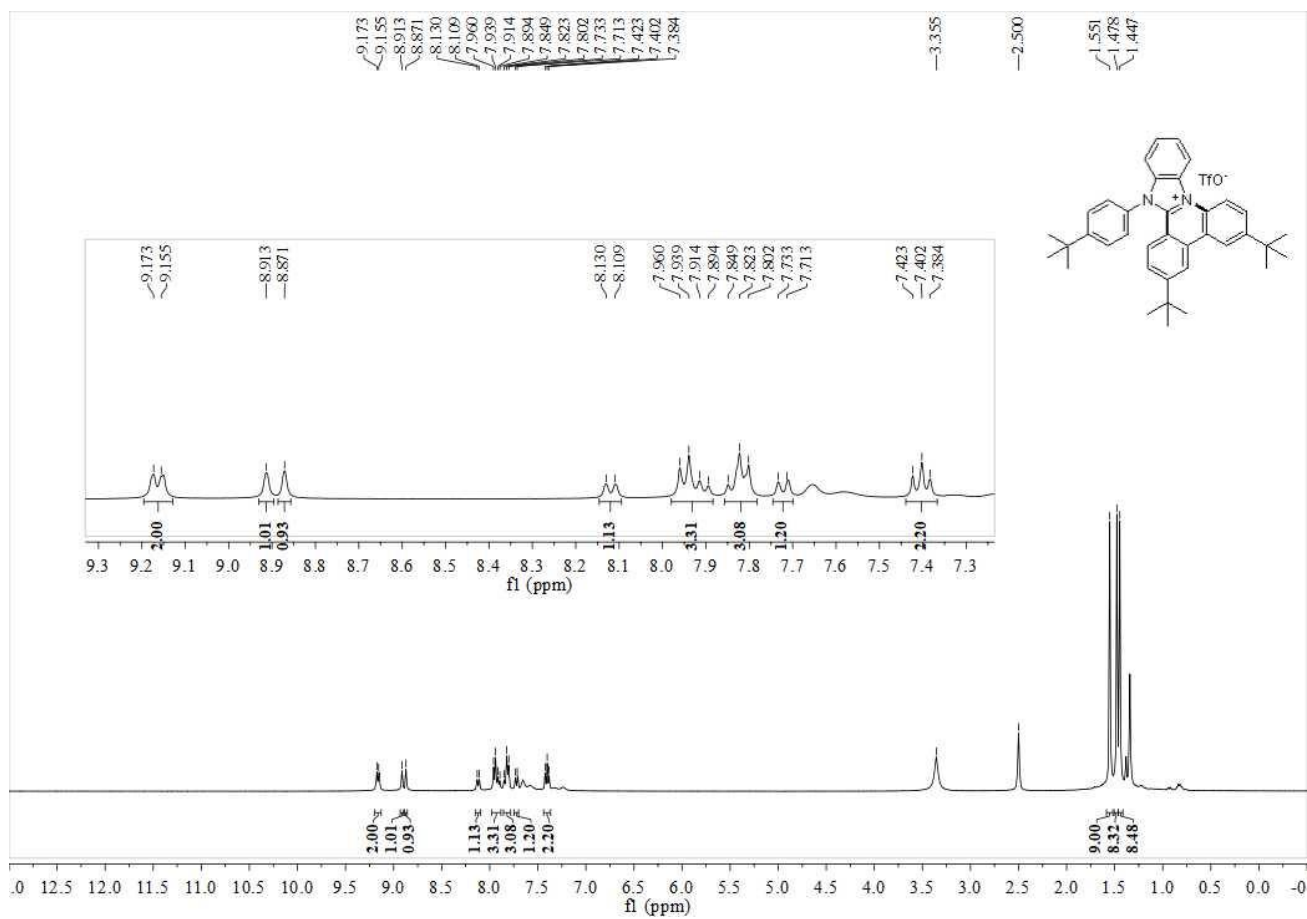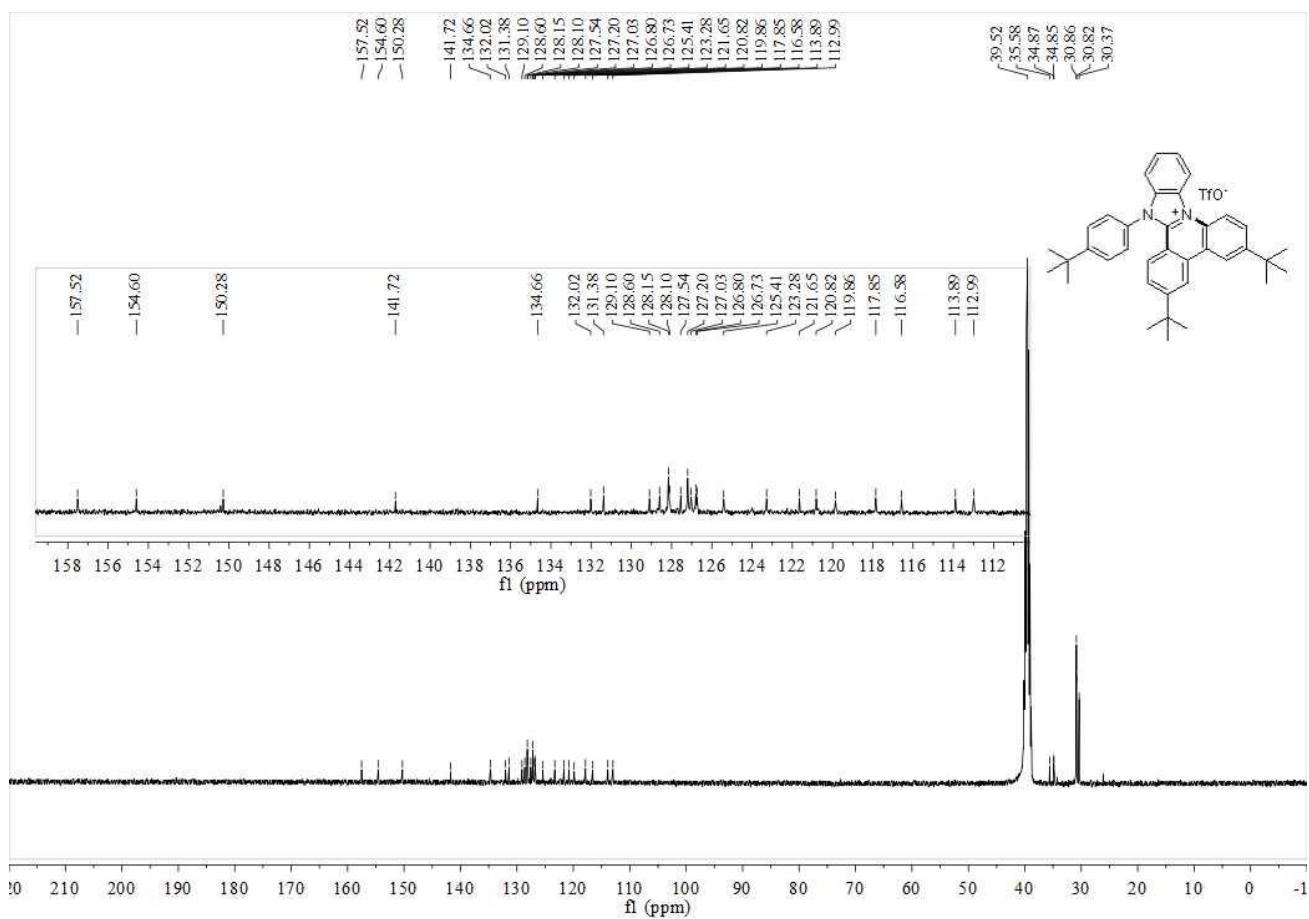

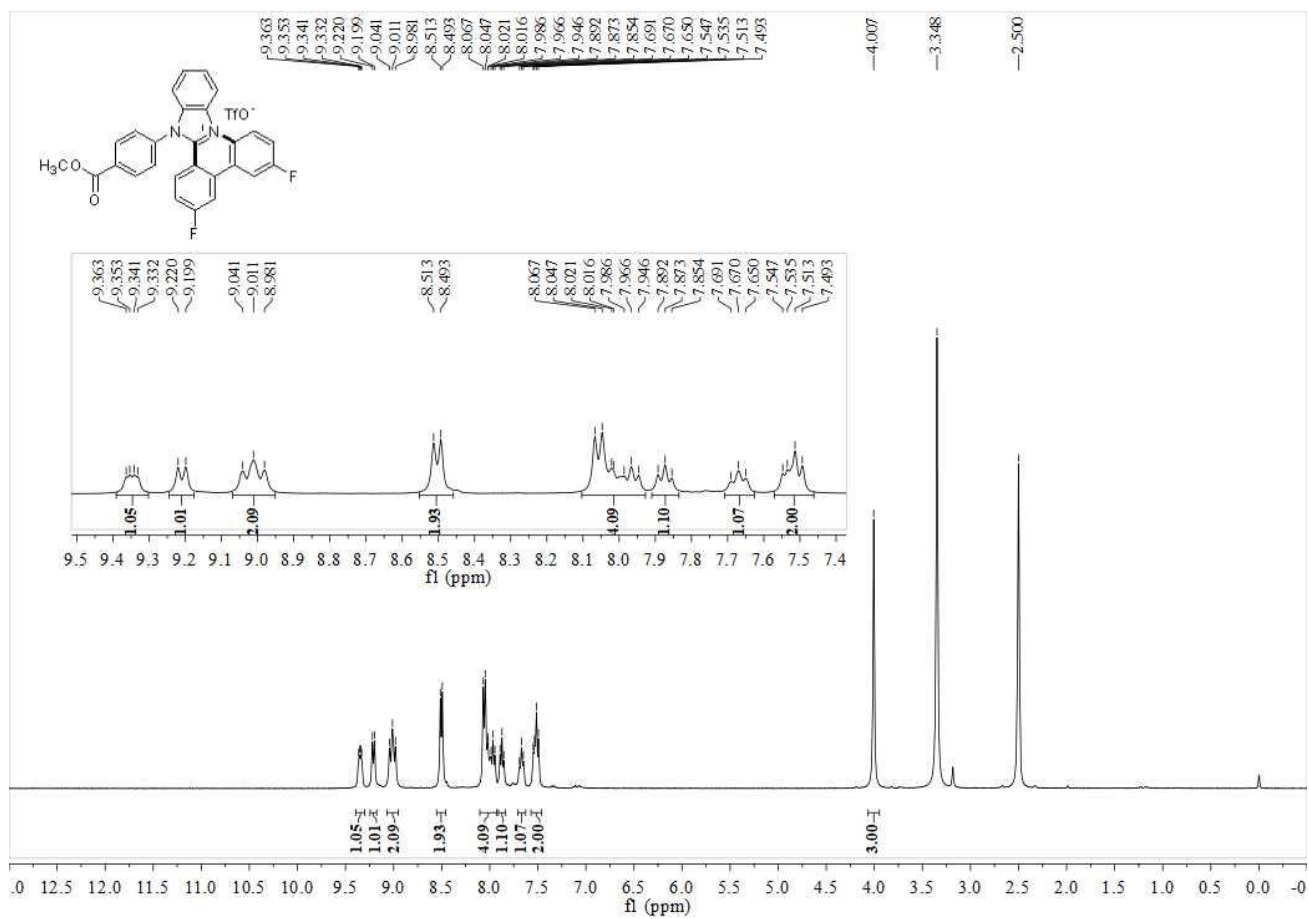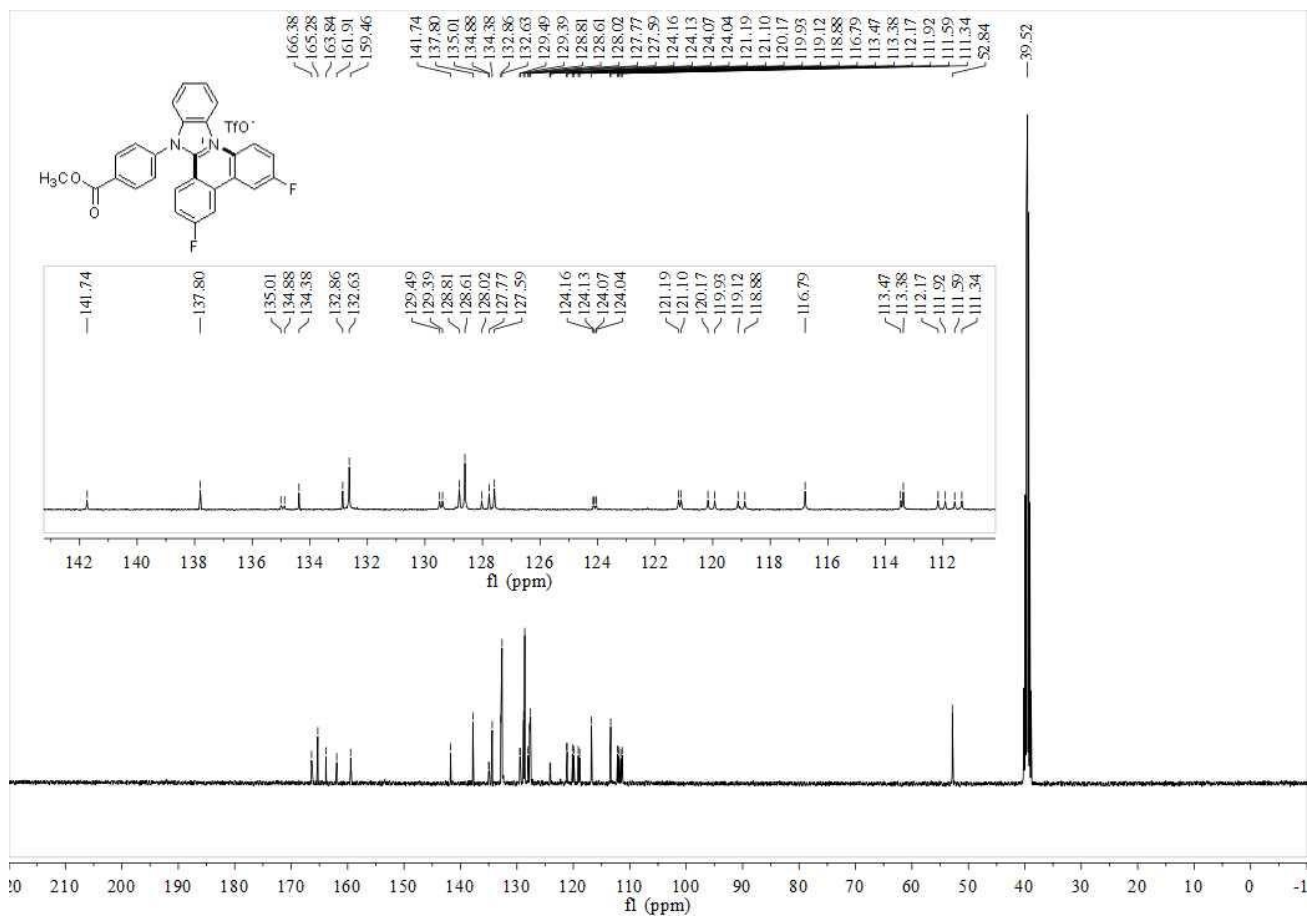

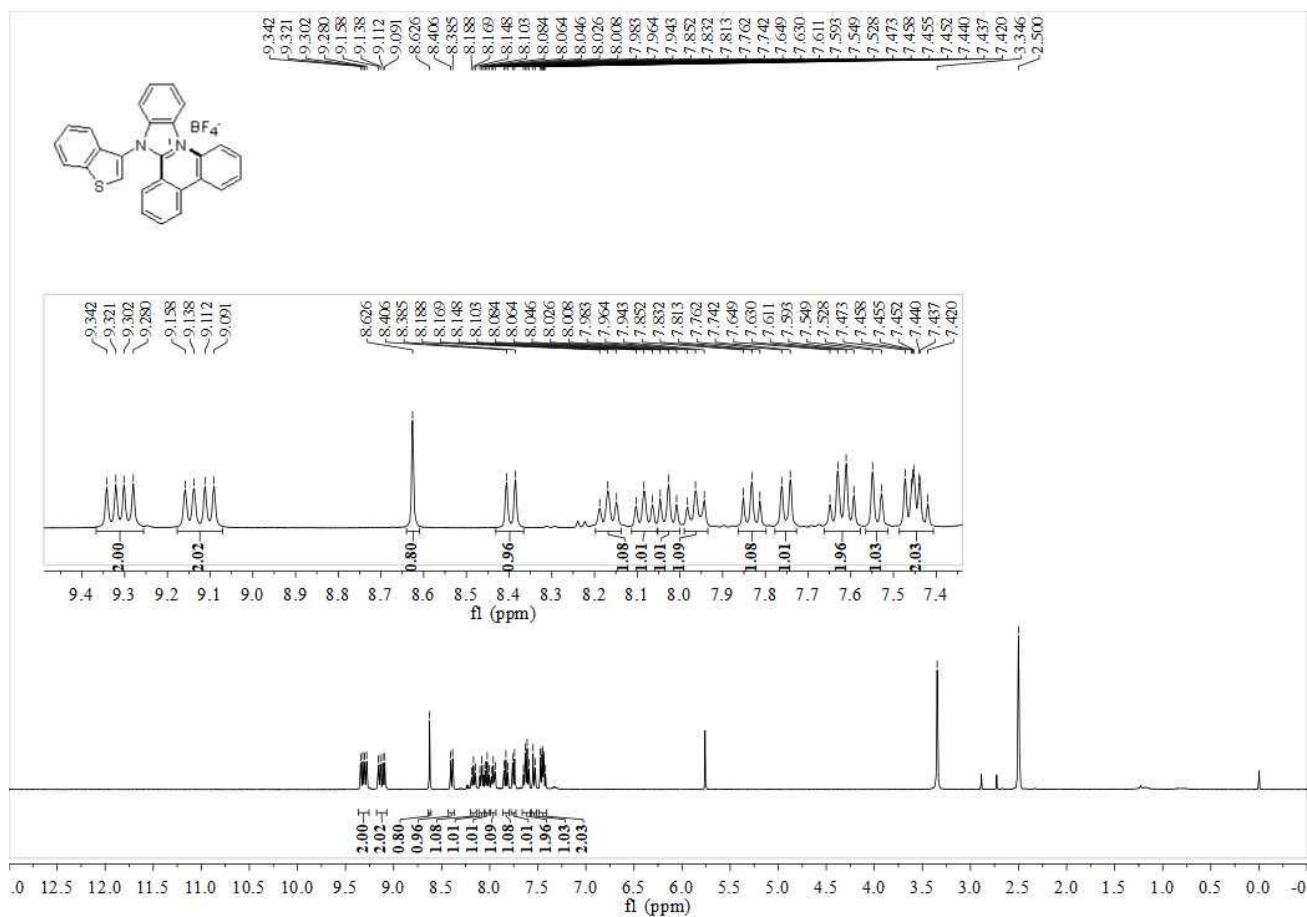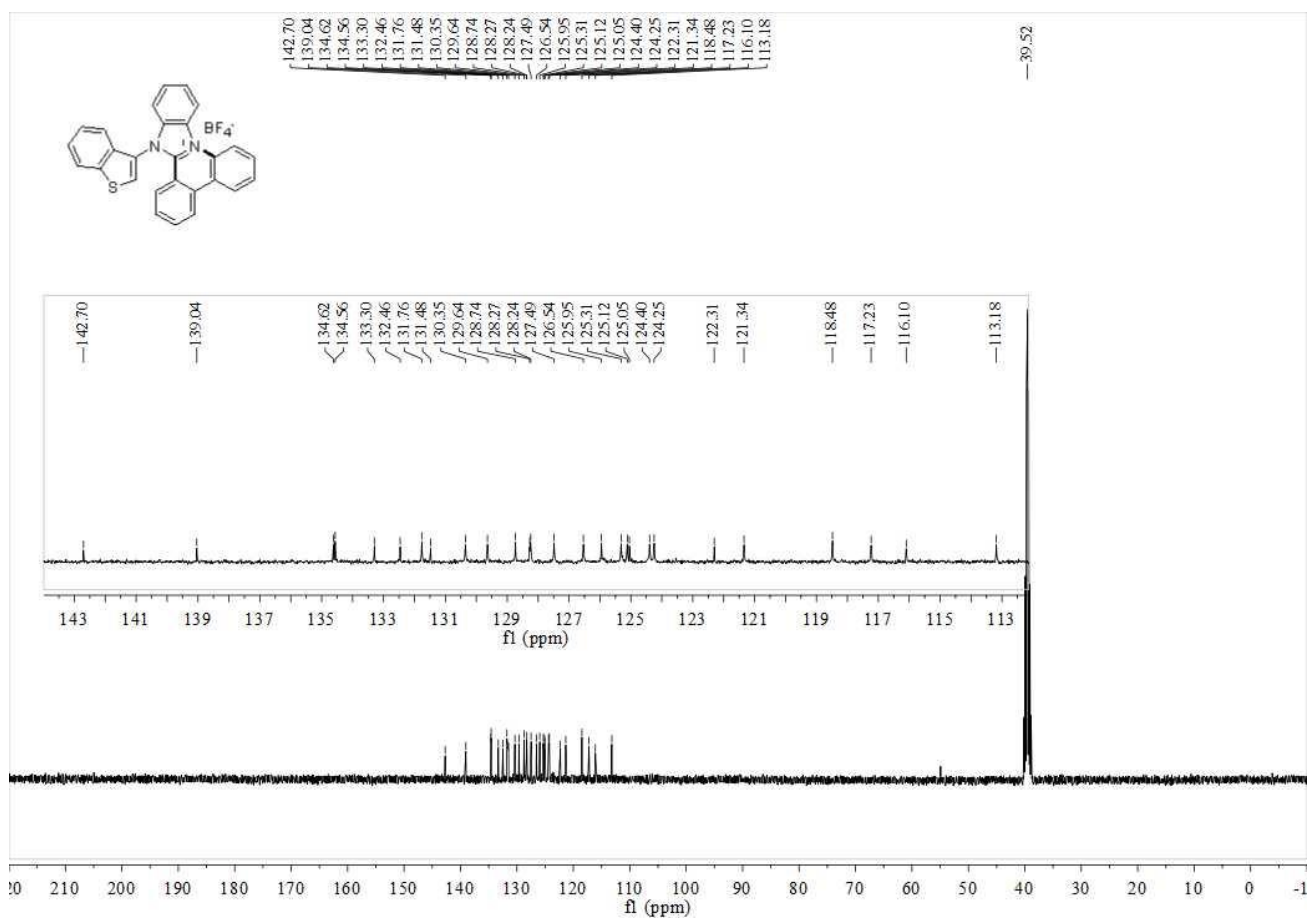

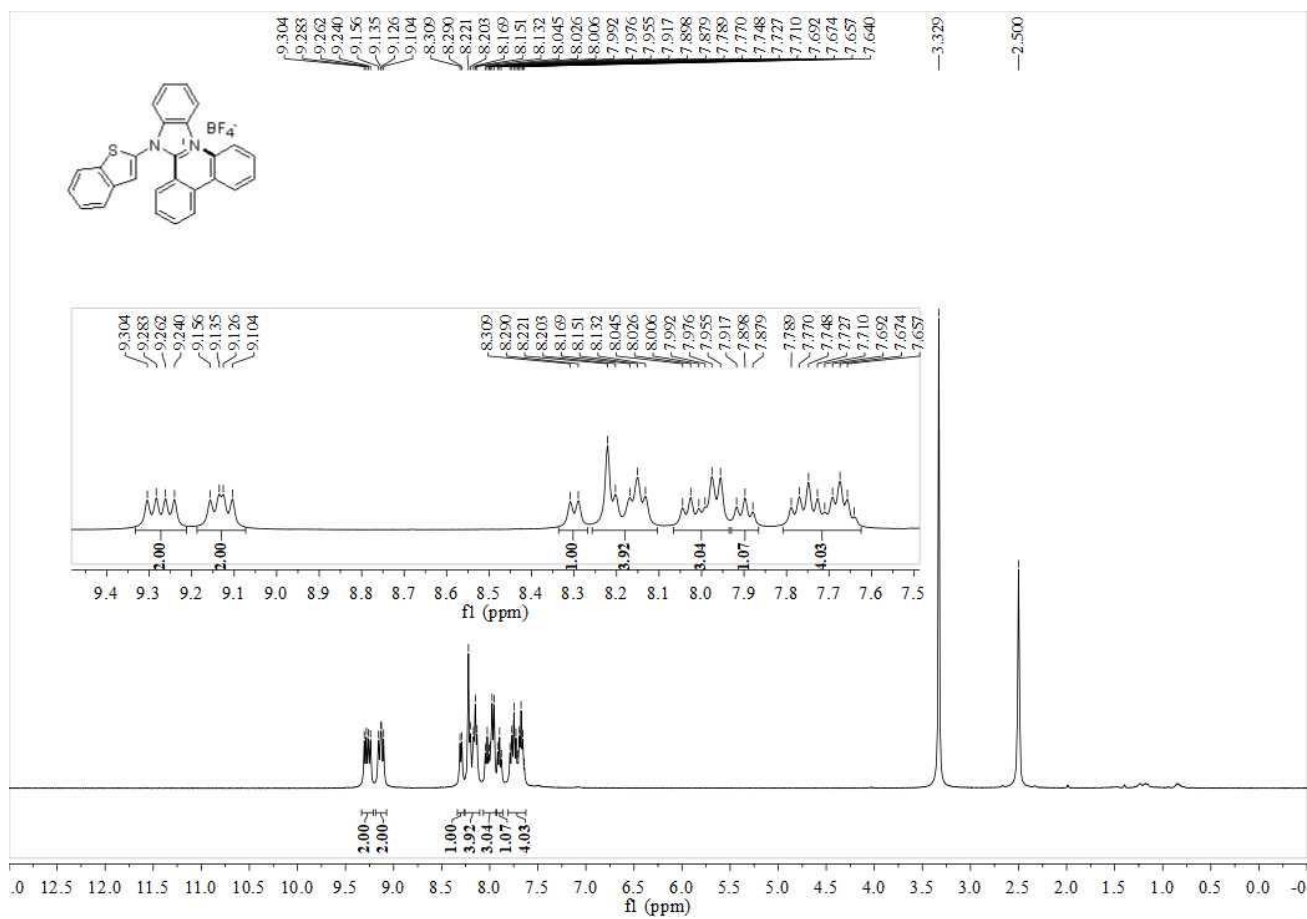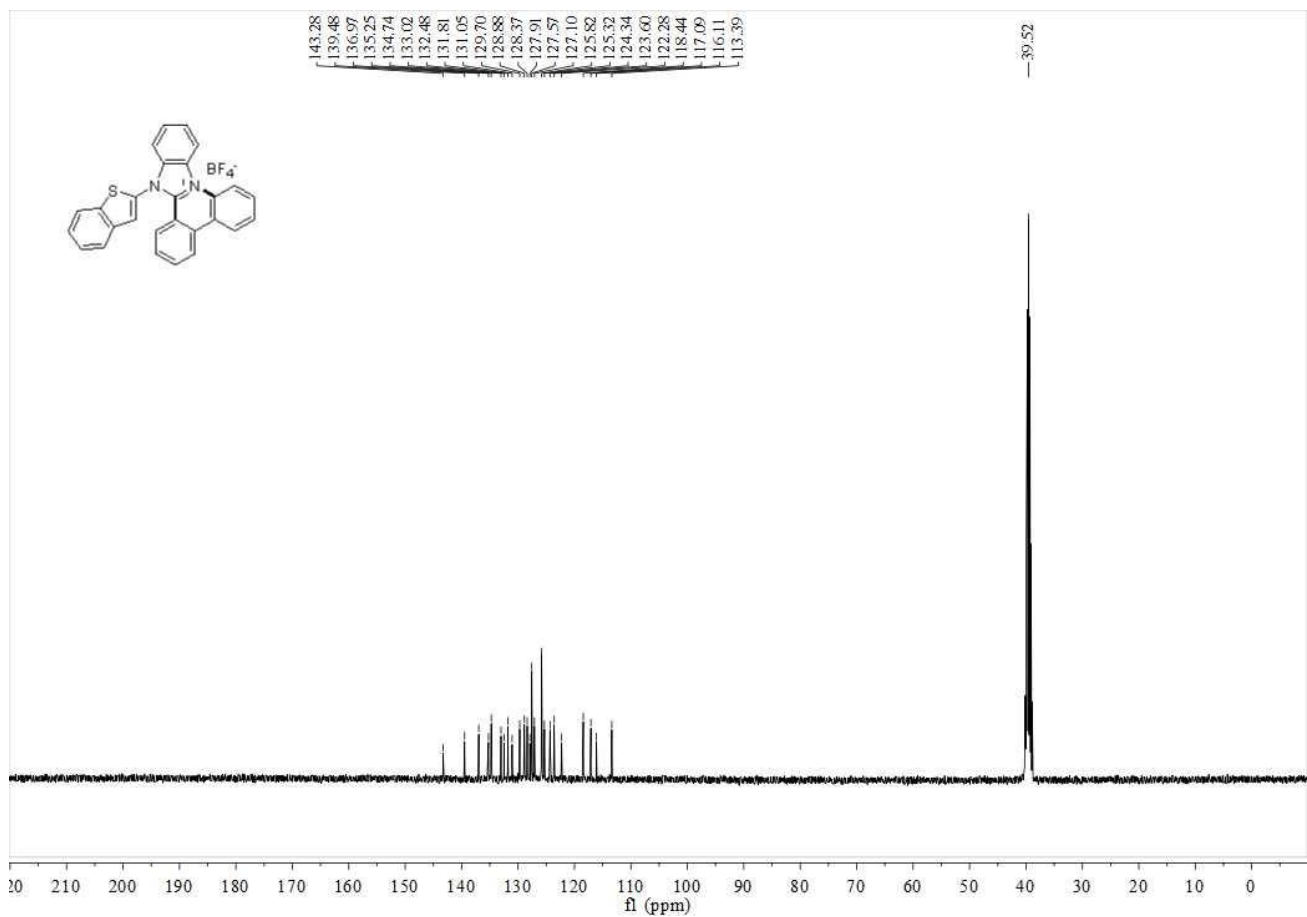

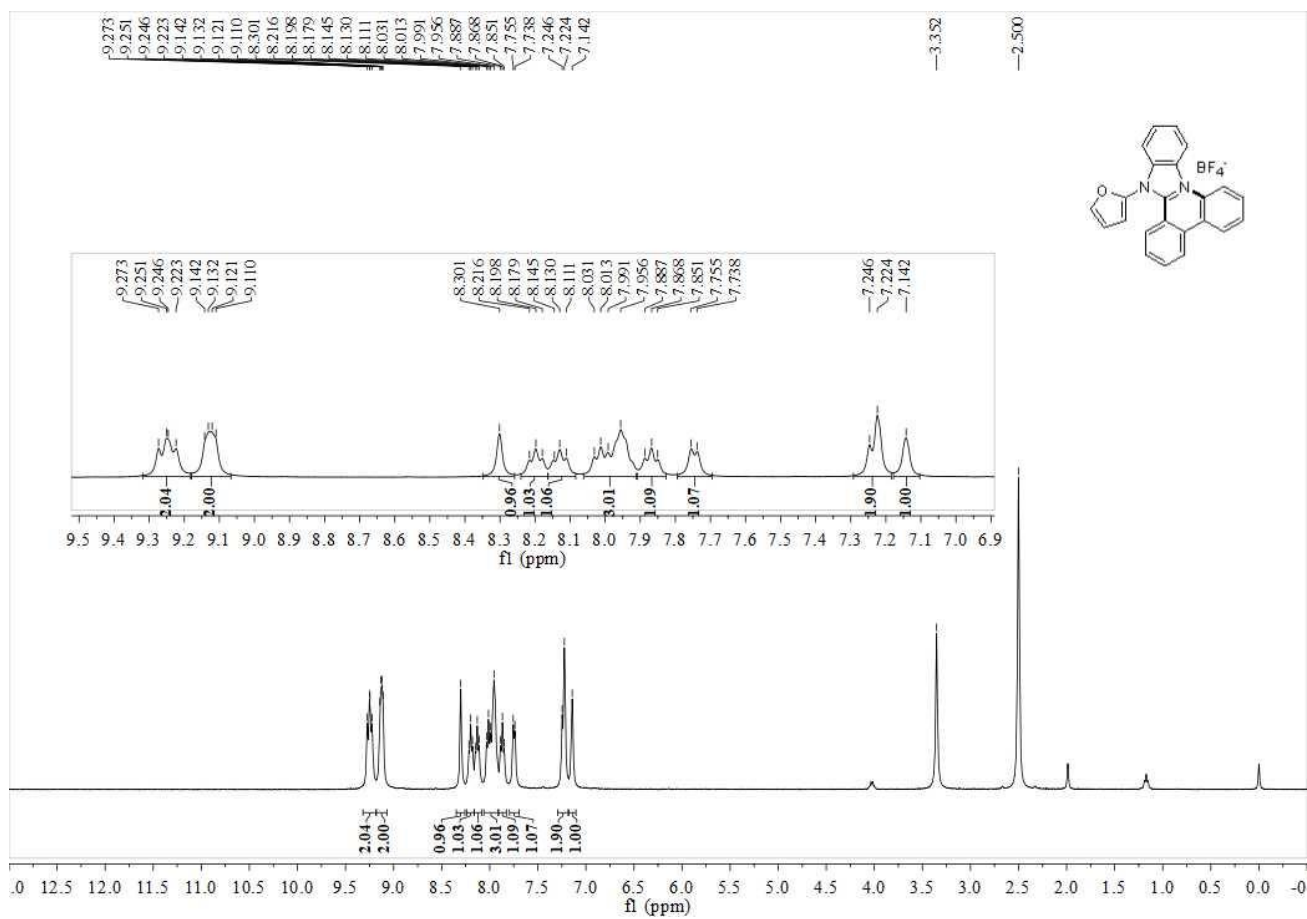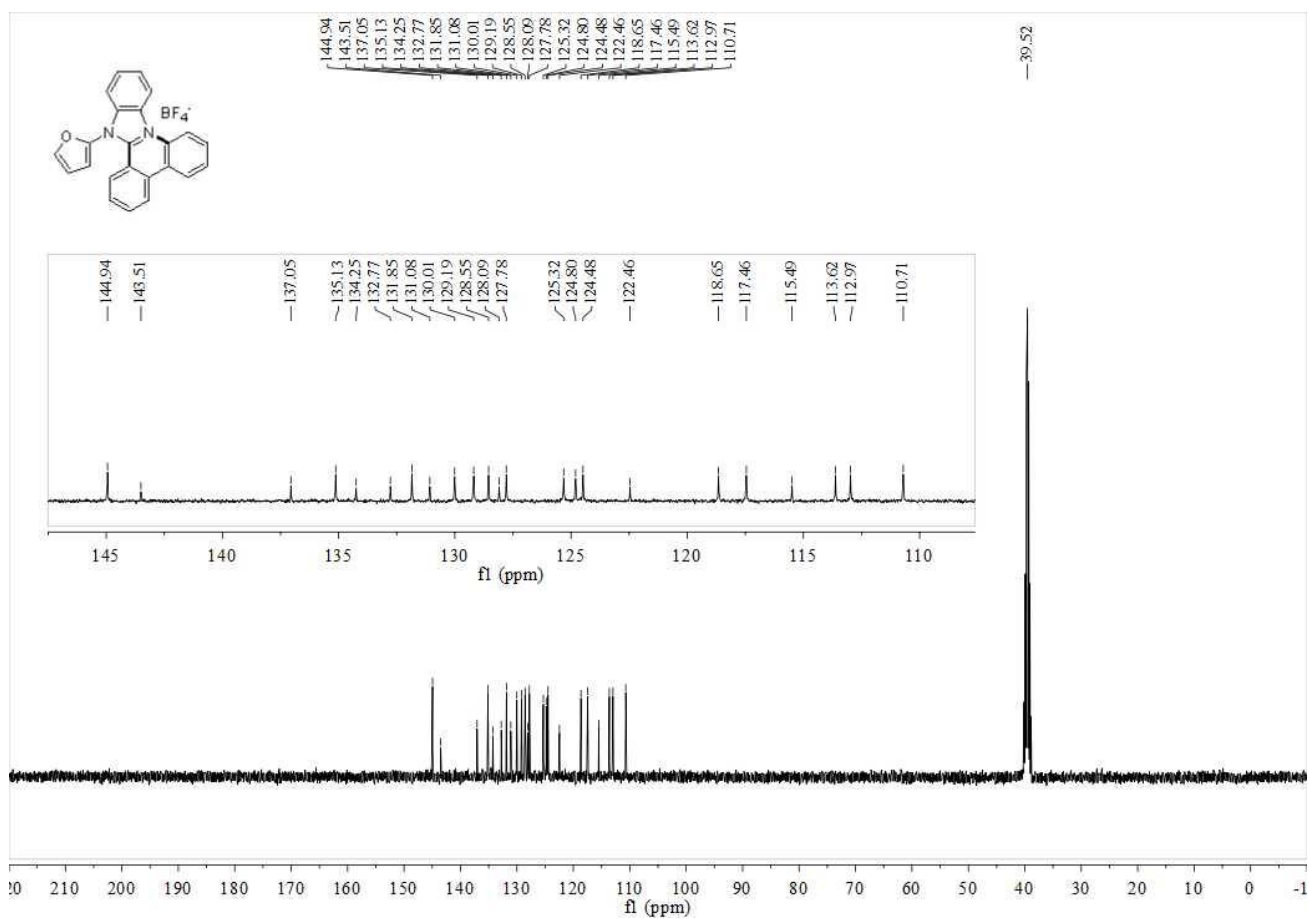

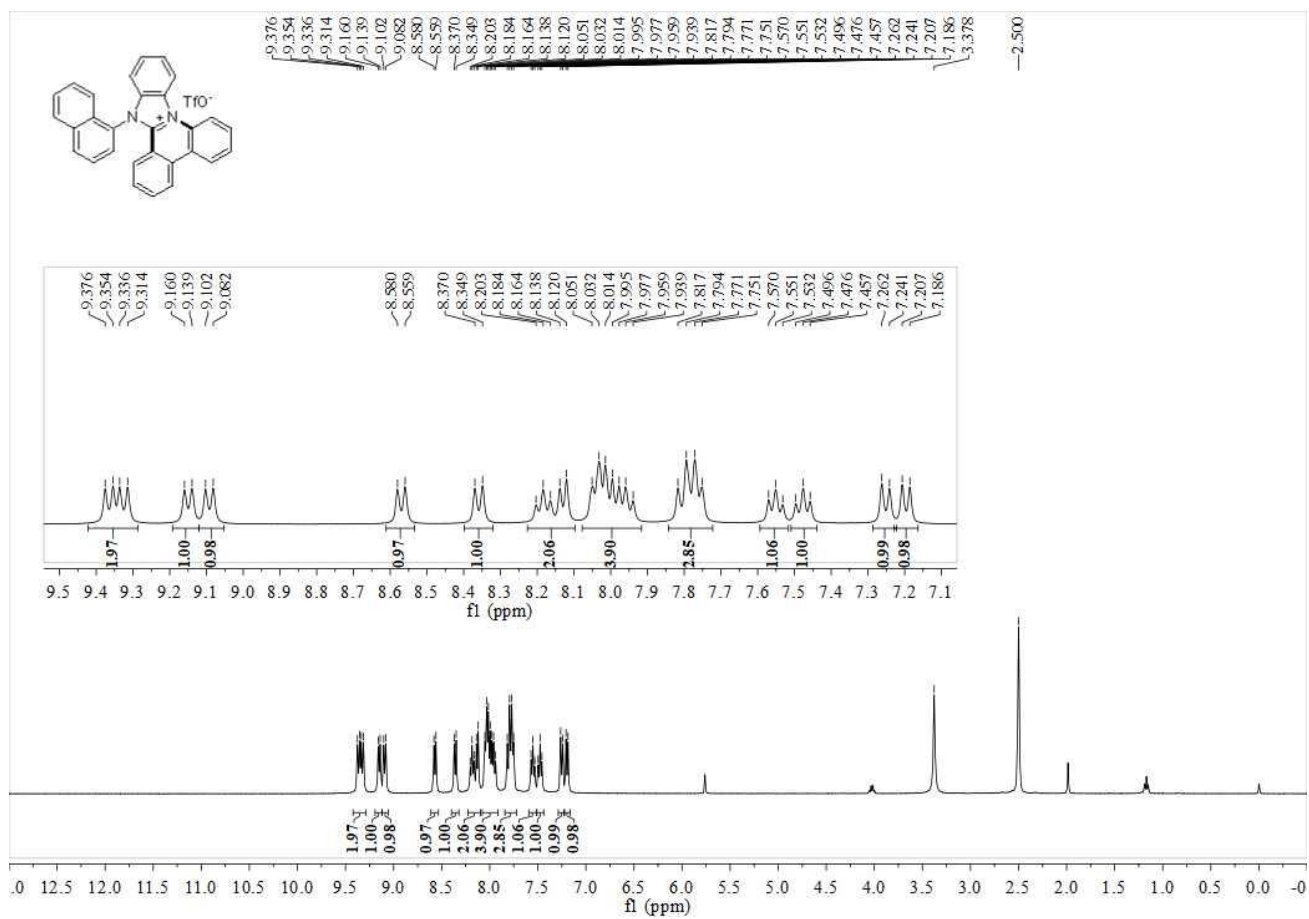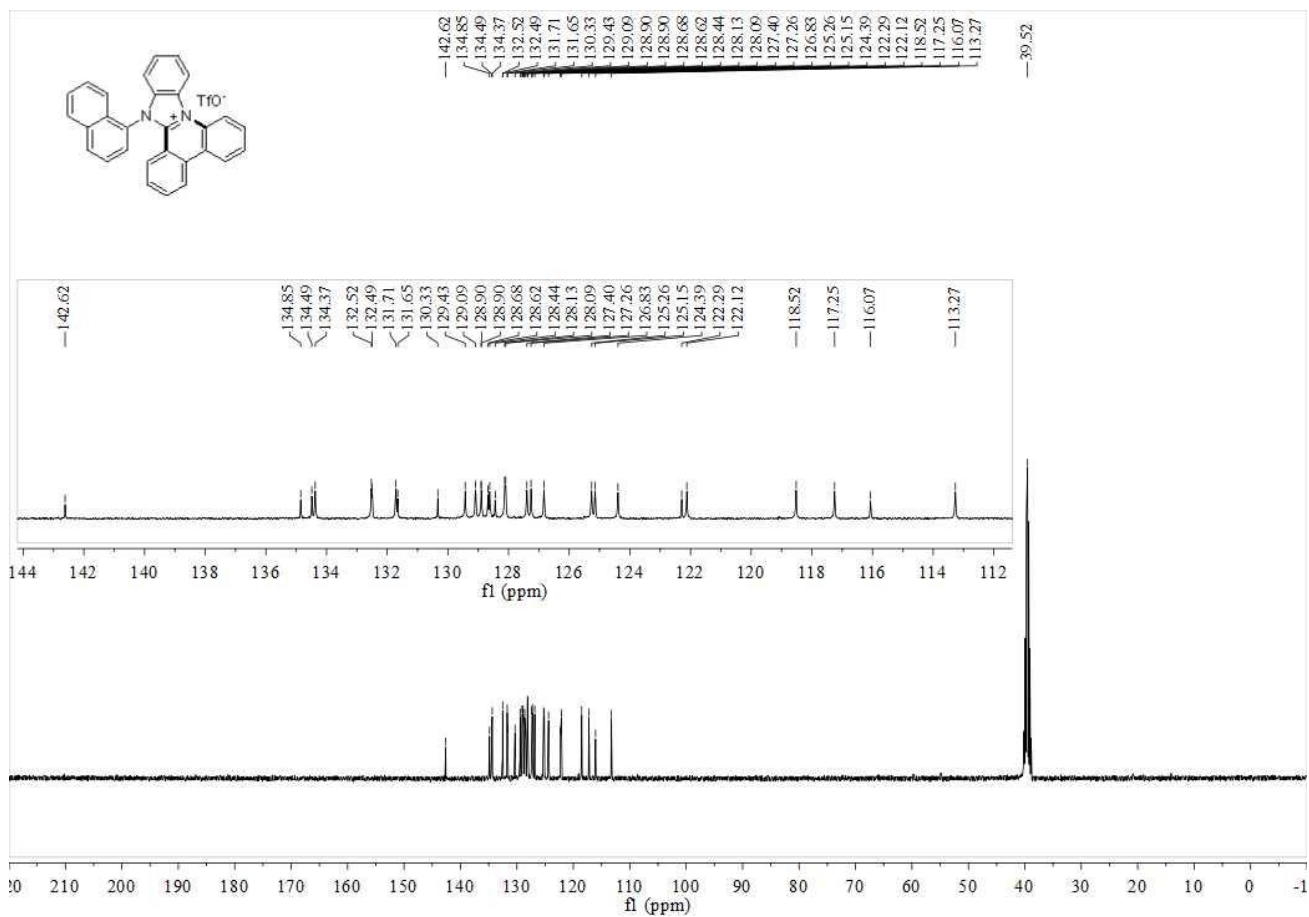

PROTON\_01

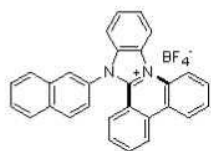

- 9.314
- 9.295
- 9.279
- 9.260
- 9.131
- 9.113
- 9.084
- 9.065
- 8.577
- 8.516
- 8.496
- 8.306
- 8.288
- 8.224
- 8.206
- 8.166
- 8.147
- 8.128
- 8.083
- 8.065
- 8.046
- 8.022
- 8.004
- 8.046
- 8.022
- 7.984
- 7.963
- 7.951
- 7.933
- 7.846
- 7.827
- 7.806
- 7.883
- 7.566
- 7.517
- 3.354
- 2.500

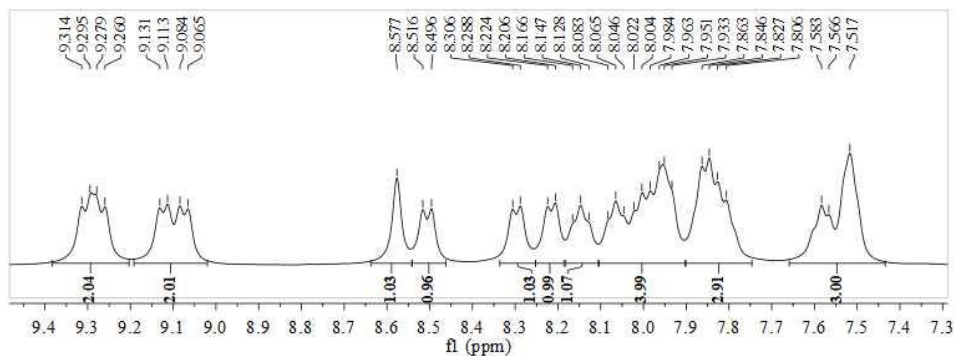

- 9.314
- 9.295
- 9.279
- 9.260
- 9.131
- 9.113
- 9.084
- 9.065

- 8.577
- 8.516
- 8.496
- 8.306
- 8.288
- 8.224
- 8.206
- 8.166
- 8.147
- 8.128
- 8.083
- 8.065
- 8.046
- 8.022
- 8.004
- 7.984
- 7.963
- 7.951
- 7.933
- 7.846
- 7.827
- 7.806
- 7.883
- 7.566
- 7.517

2.04 2.01 1.03 0.96 1.03 0.99 1.07 3.99 2.91 3.00

12.5 12.0 11.5 11.0 10.5 10.0 9.5 9.0 8.5 8.0 7.5 7.0 6.5 6.0 5.5 5.0 4.5 4.0 3.5 3.0 2.5 2.0 1.5 1.0 0.5 0.0 -0

CARBON\_01

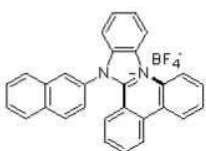

- 142.402
- 134.971
- 134.363
- 133.890
- 133.332
- 132.331
- 132.020
- 131.724
- 131.594
- 131.261
- 129.373
- 128.833
- 128.713
- 128.583
- 128.444
- 128.165
- 128.060
- 127.951
- 127.498
- 127.384
- 125.301
- 124.380
- 124.256
- 122.188
- 118.389
- 117.029
- 116.316
- 113.585
- 39.520

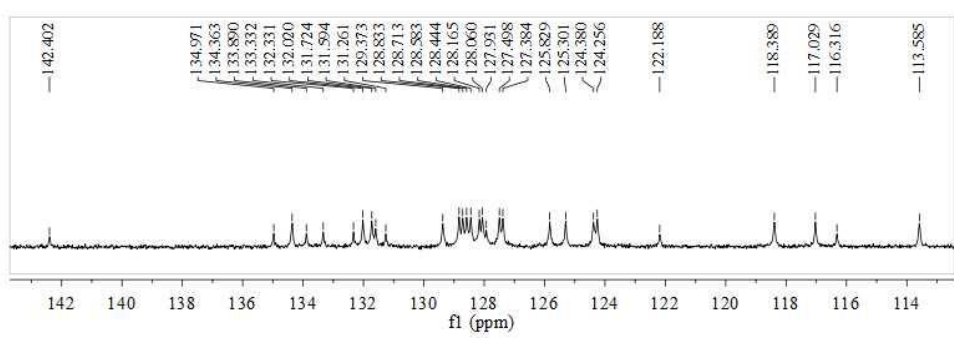

- 134.971
- 134.363
- 133.890
- 133.332
- 132.331
- 132.020
- 131.724
- 131.594
- 131.261
- 129.373
- 128.833
- 128.713
- 128.583
- 128.444
- 128.165
- 128.060
- 127.951
- 127.498
- 127.384
- 125.301
- 124.380
- 124.256

210 200 190 180 170 160 150 140 130 120 110 100 90 80 70 60 50 40 30 20 10 0 -1



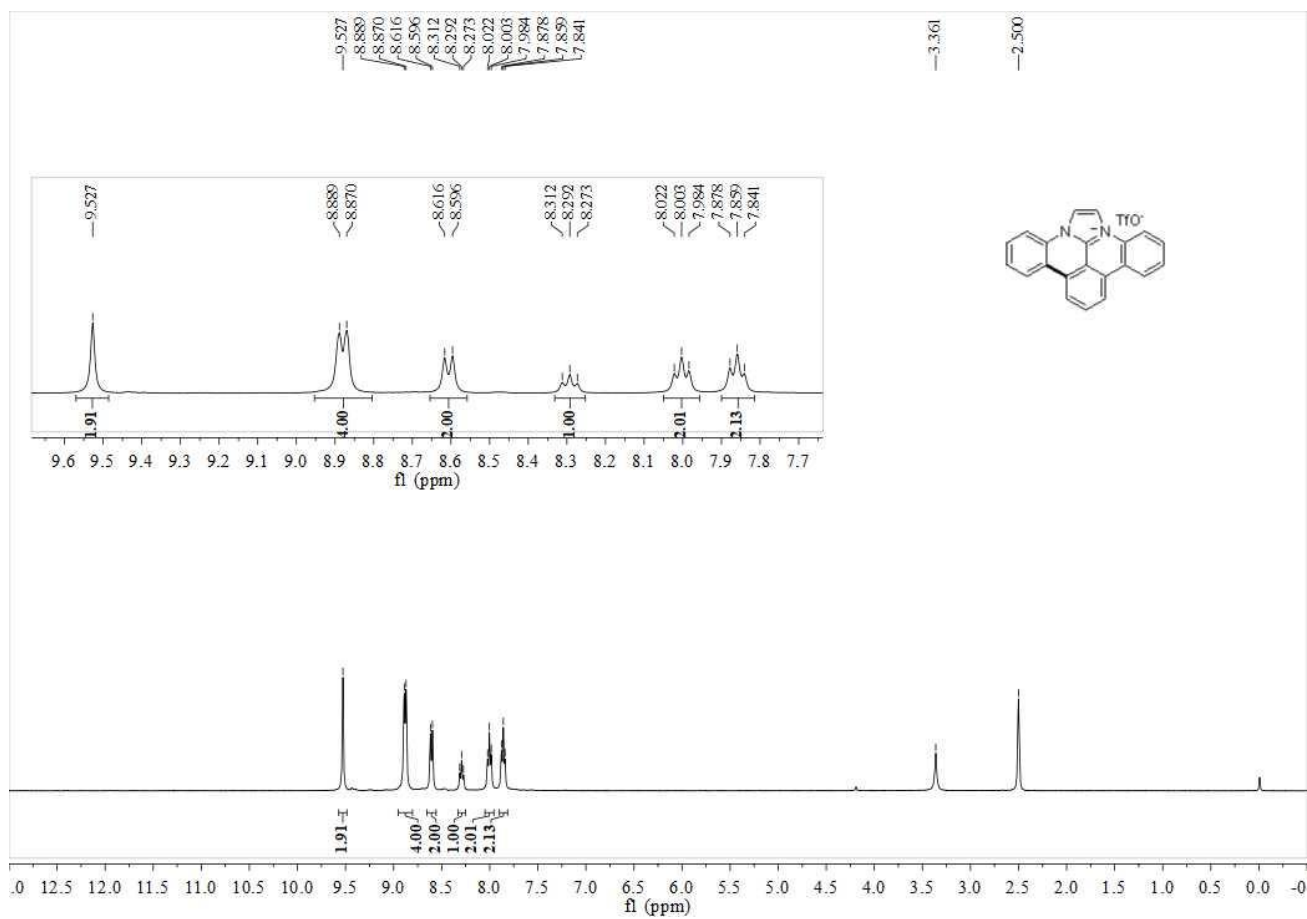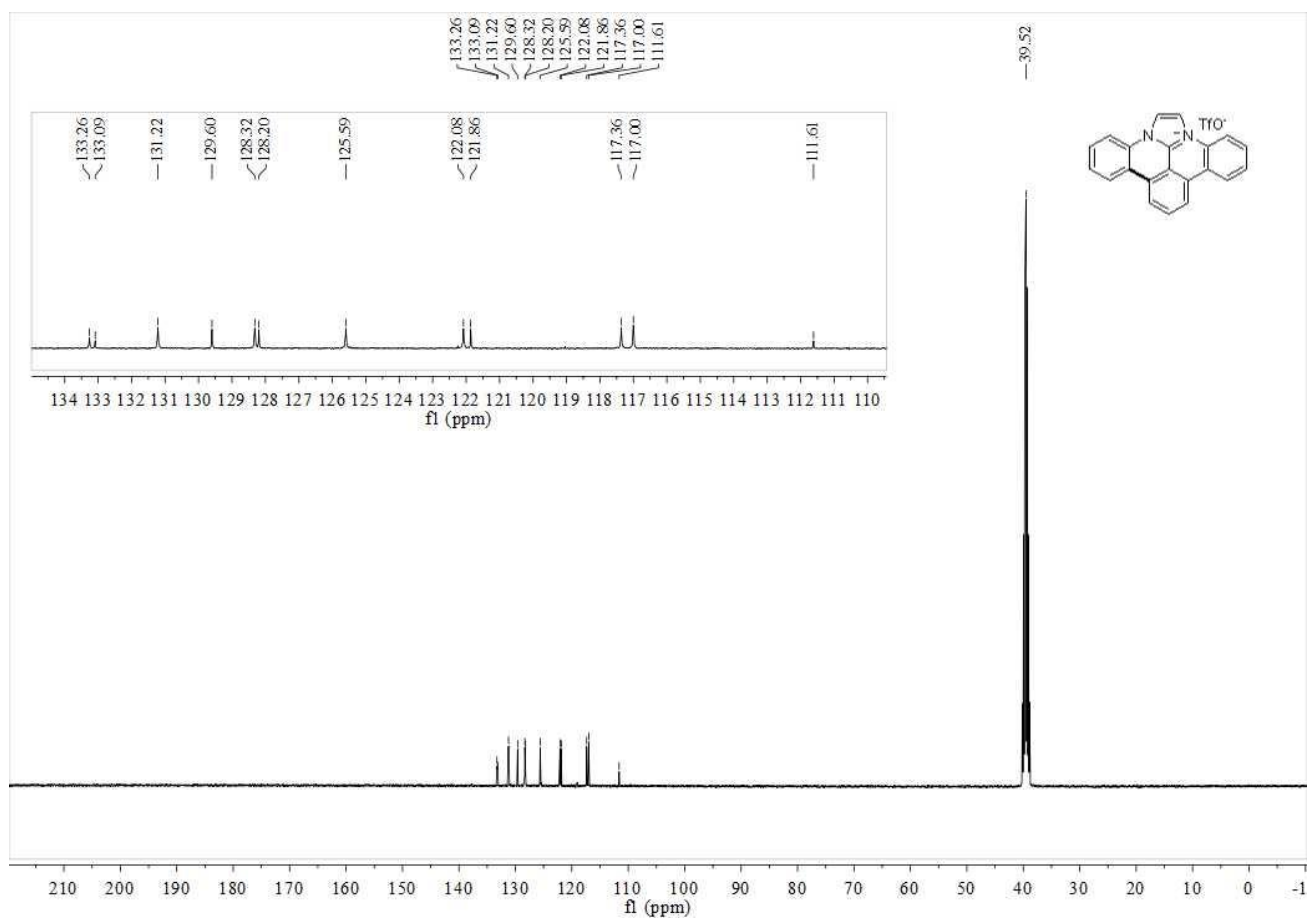

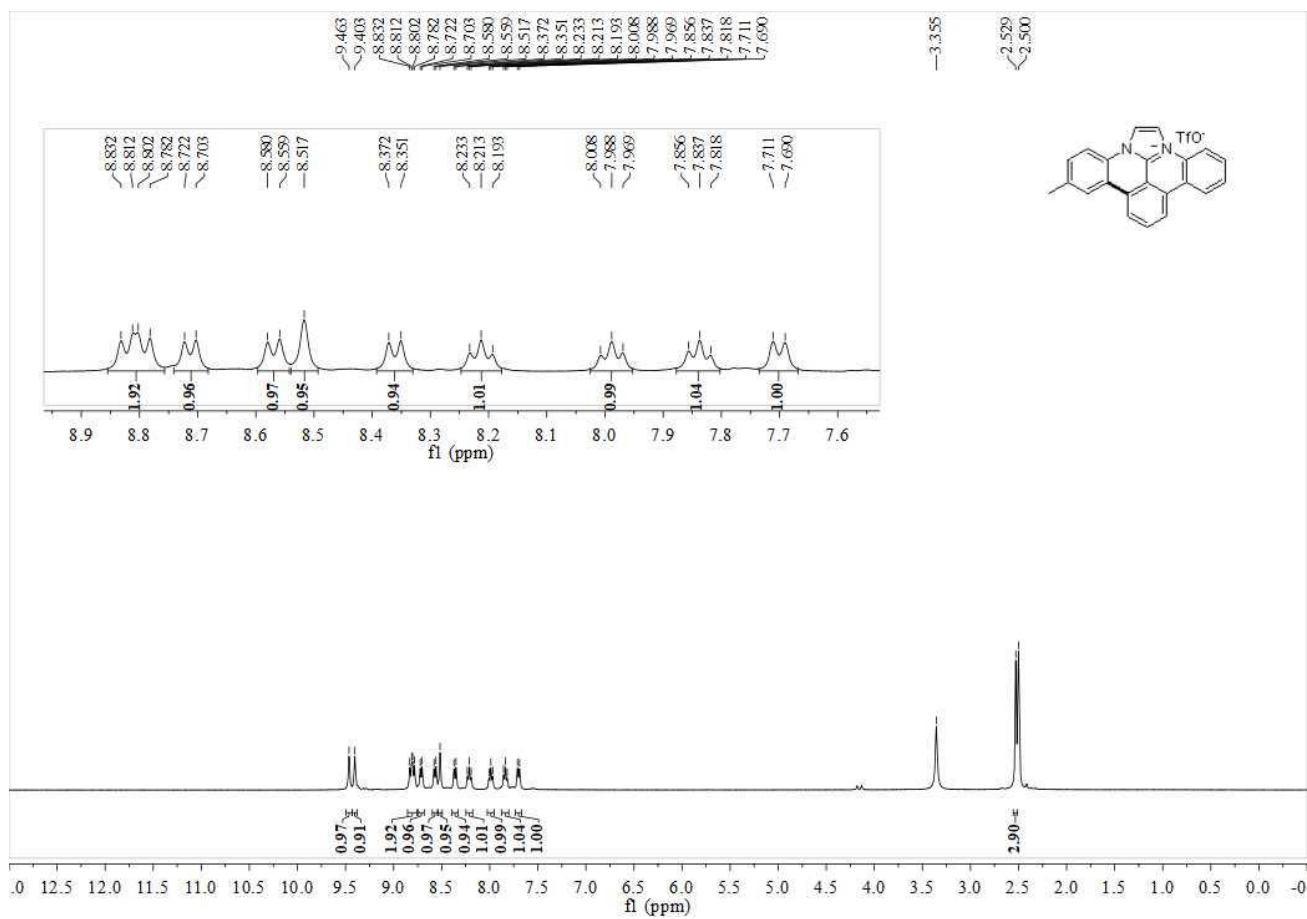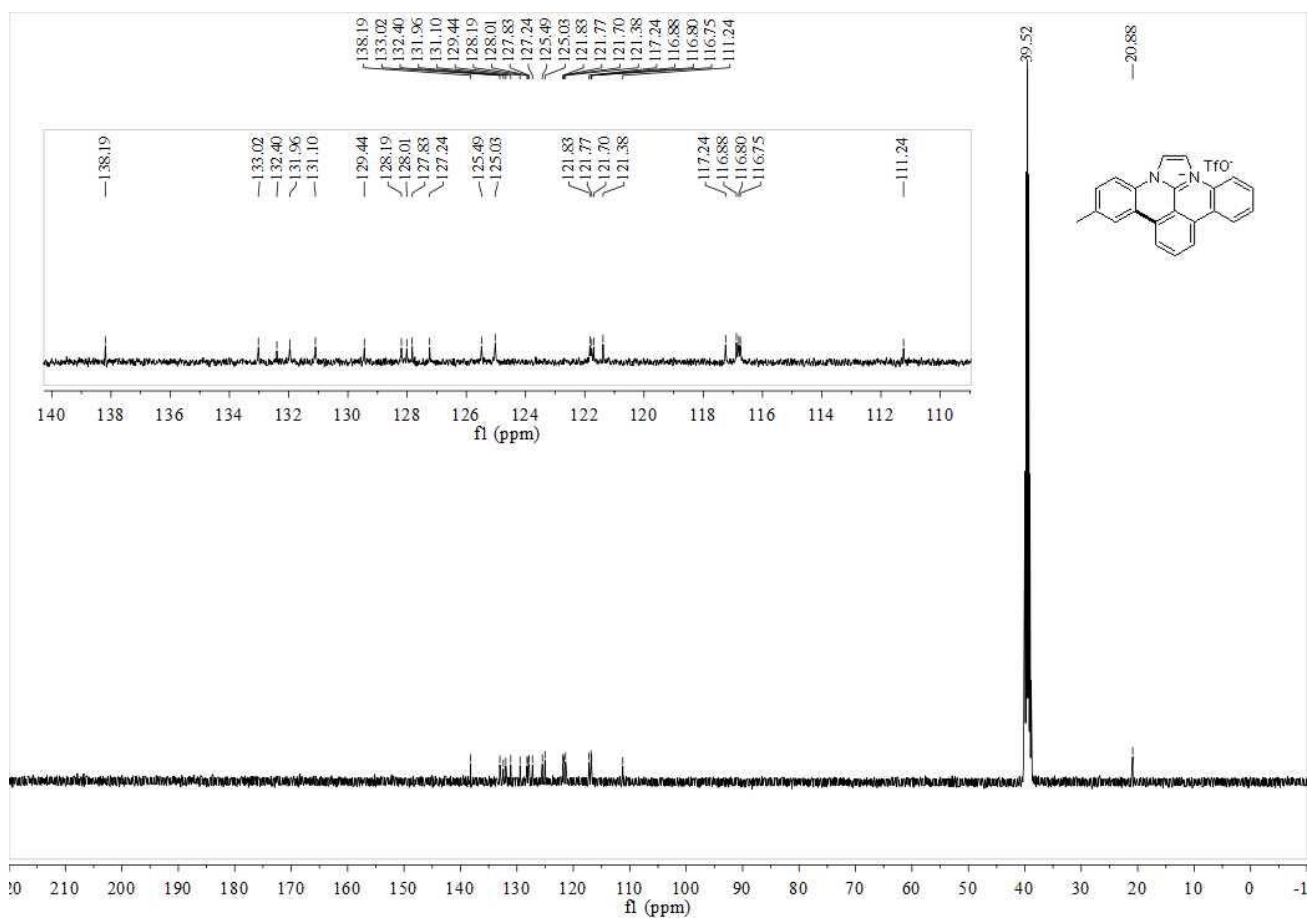

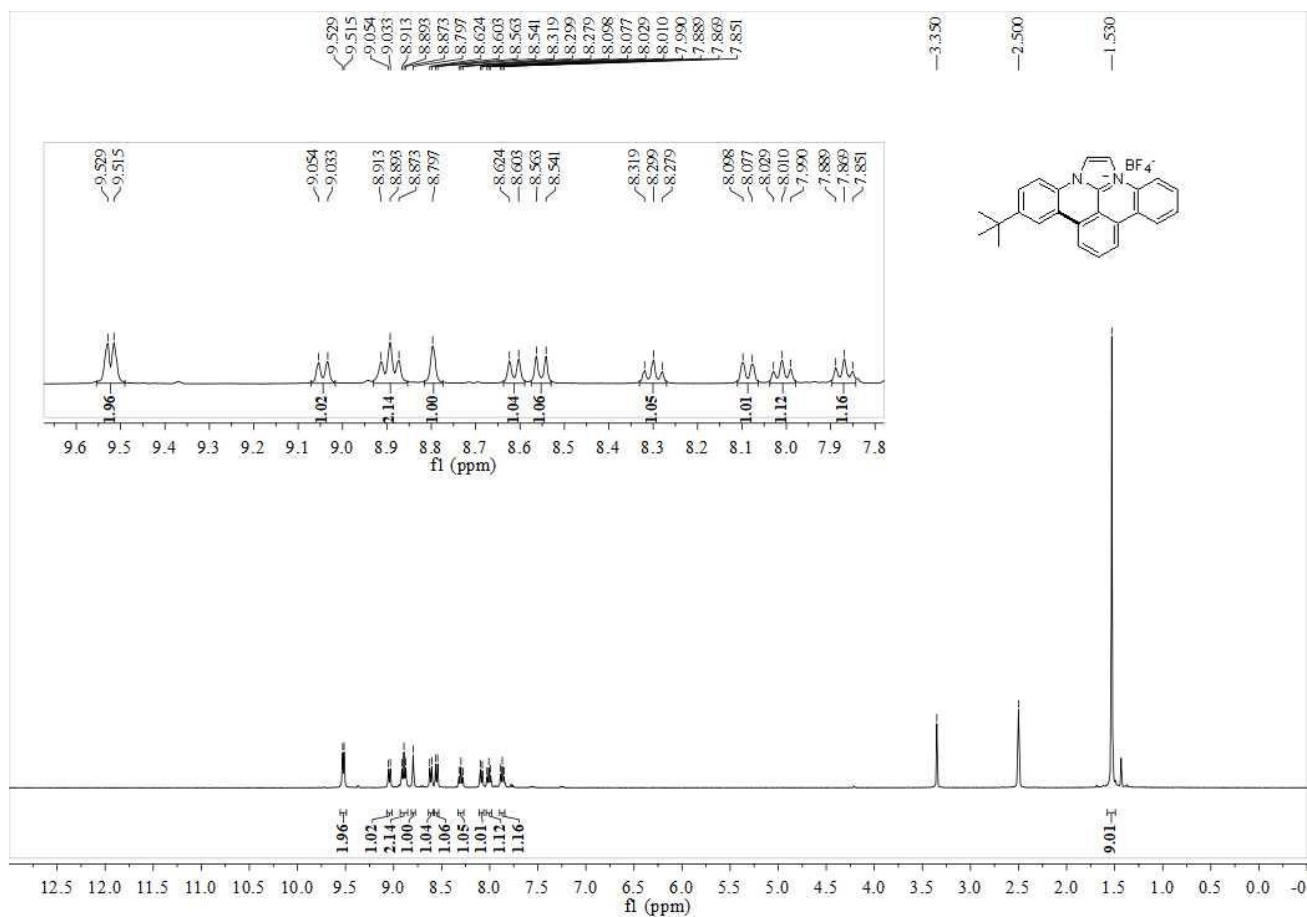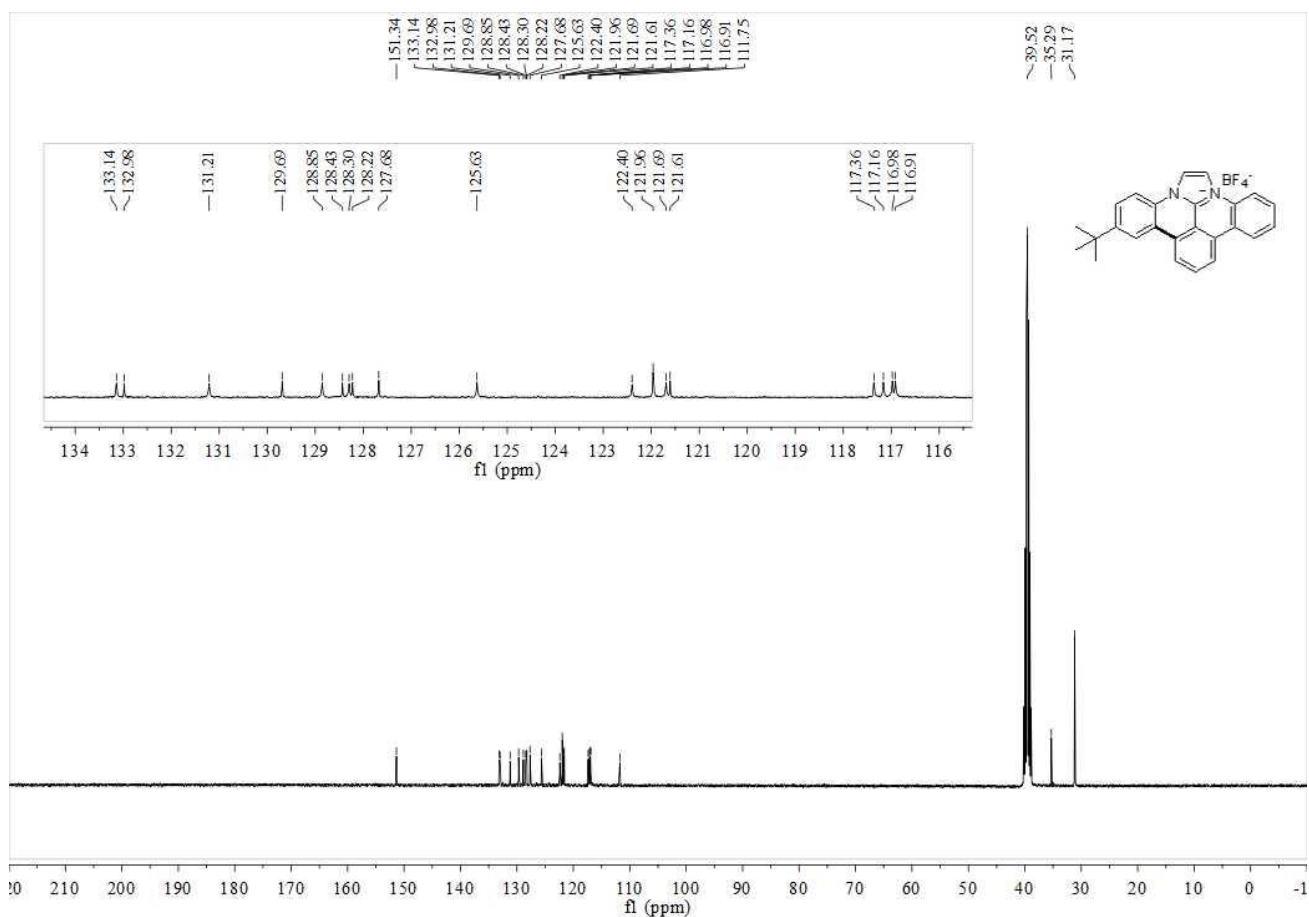

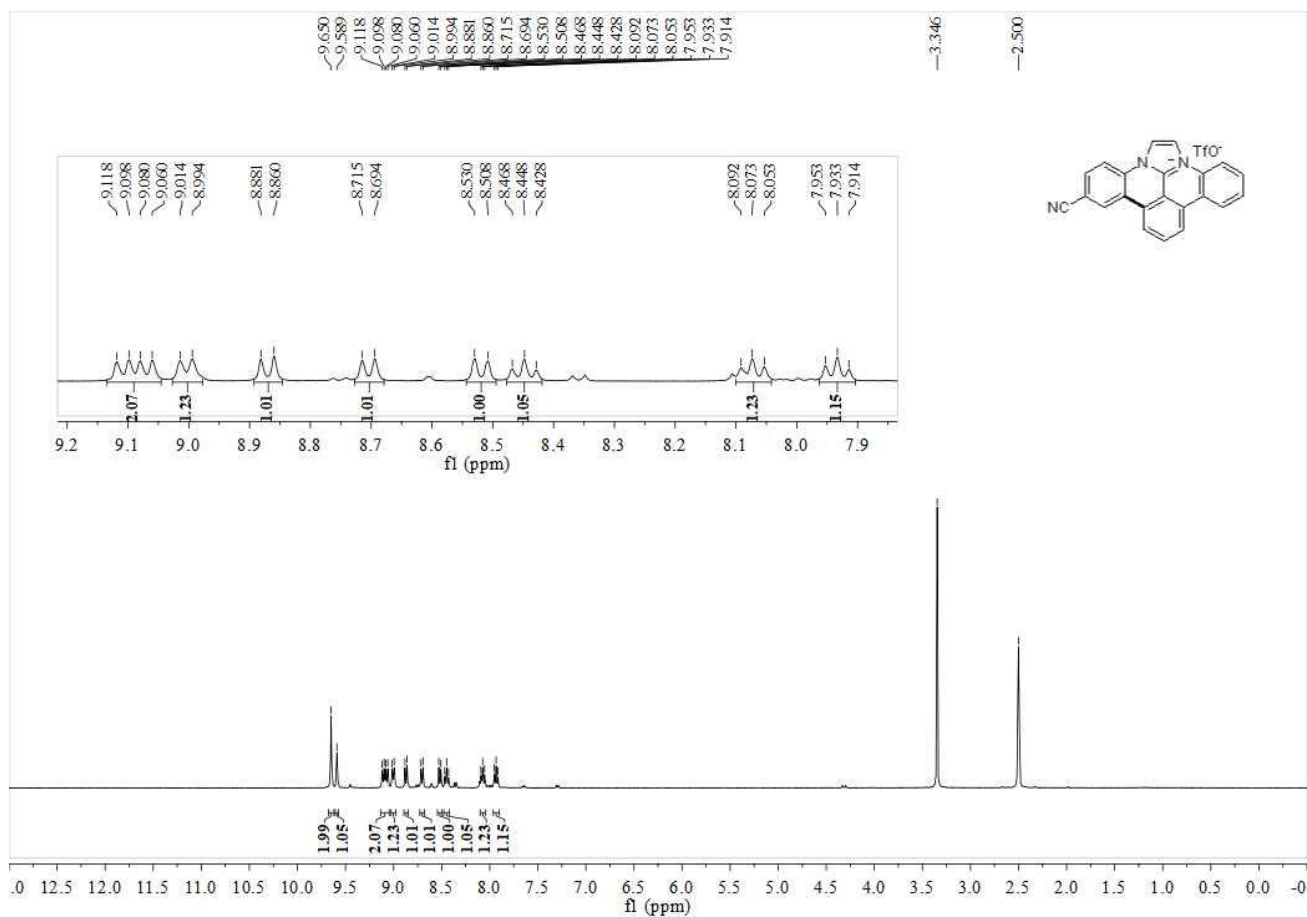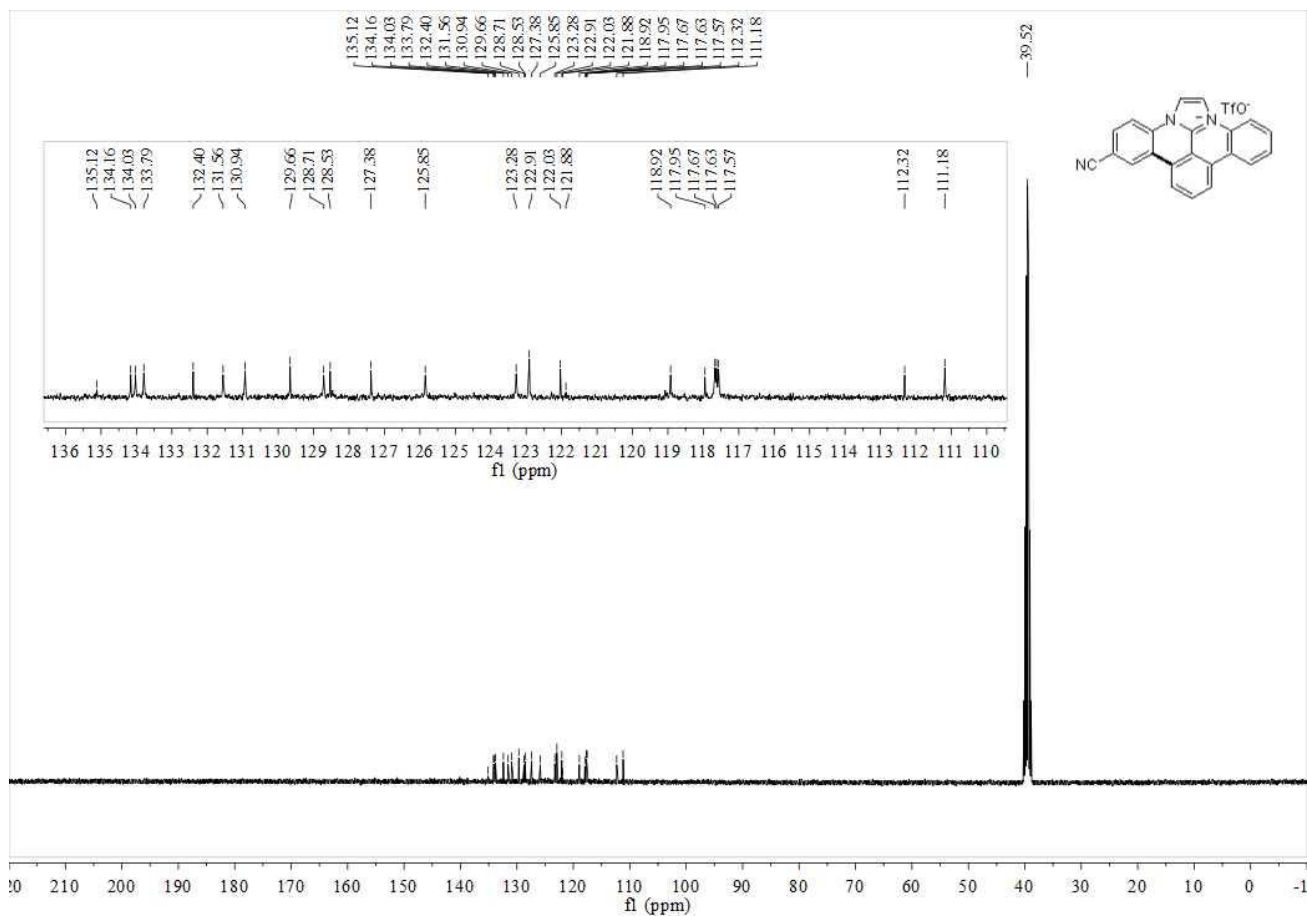

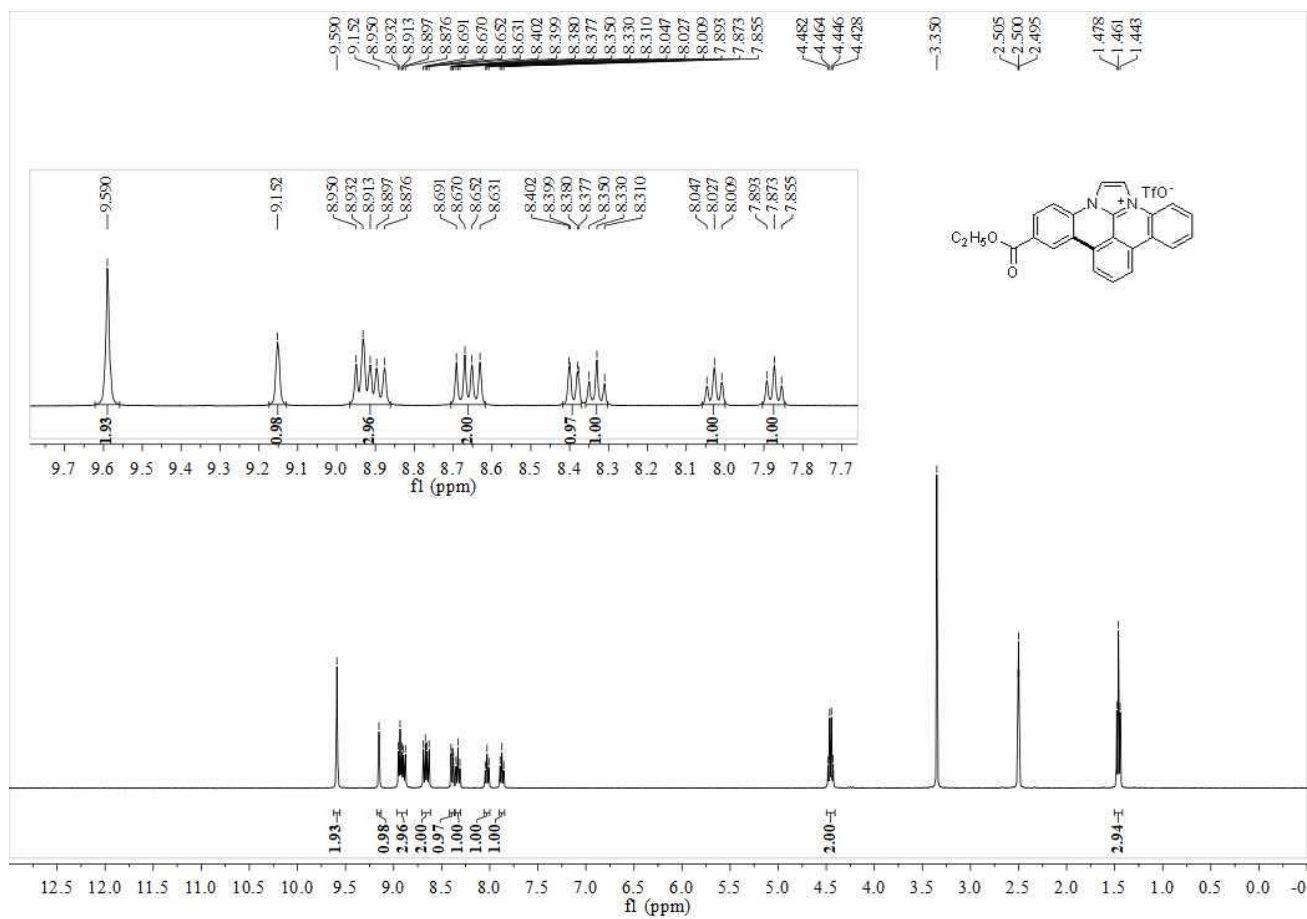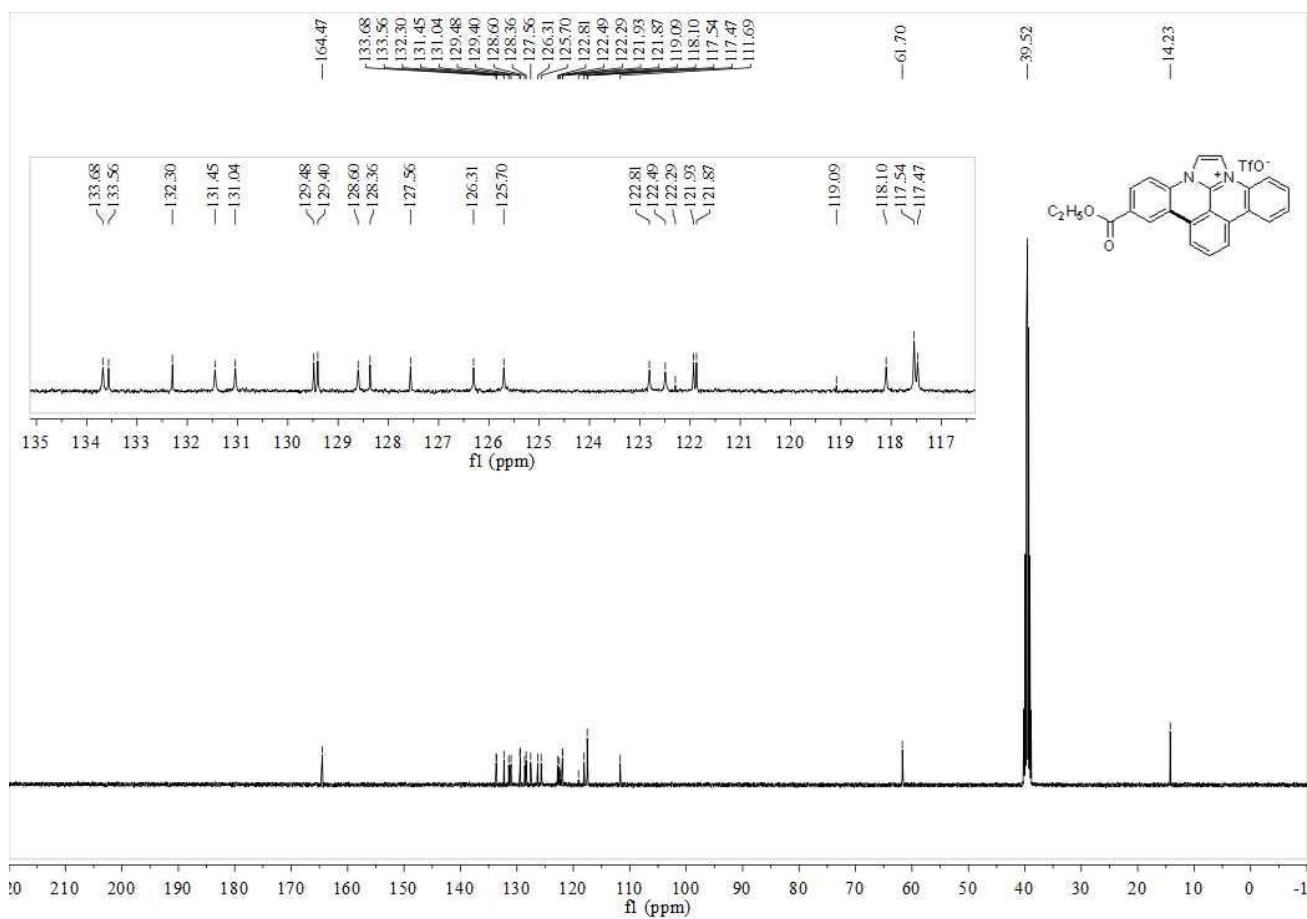

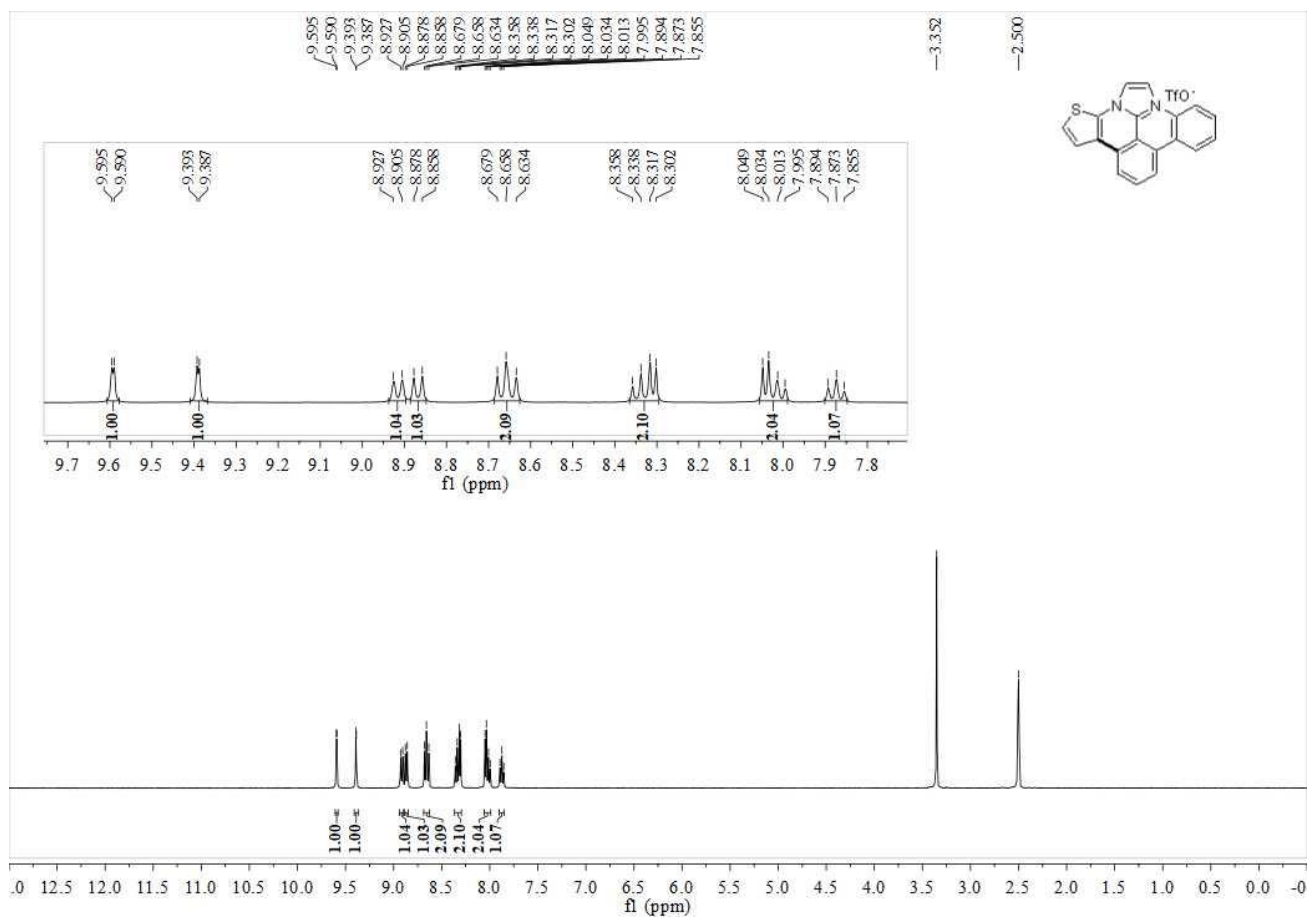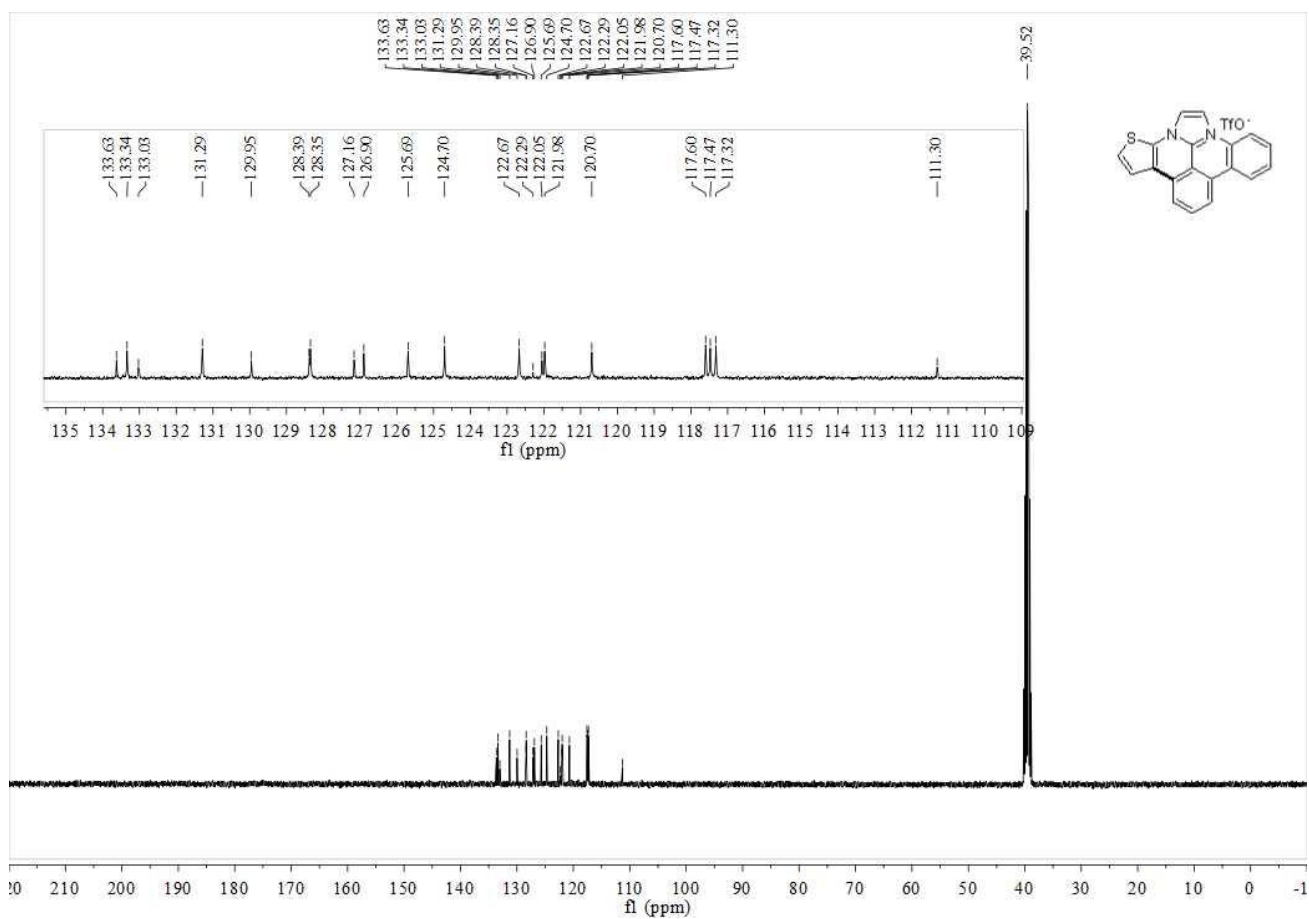

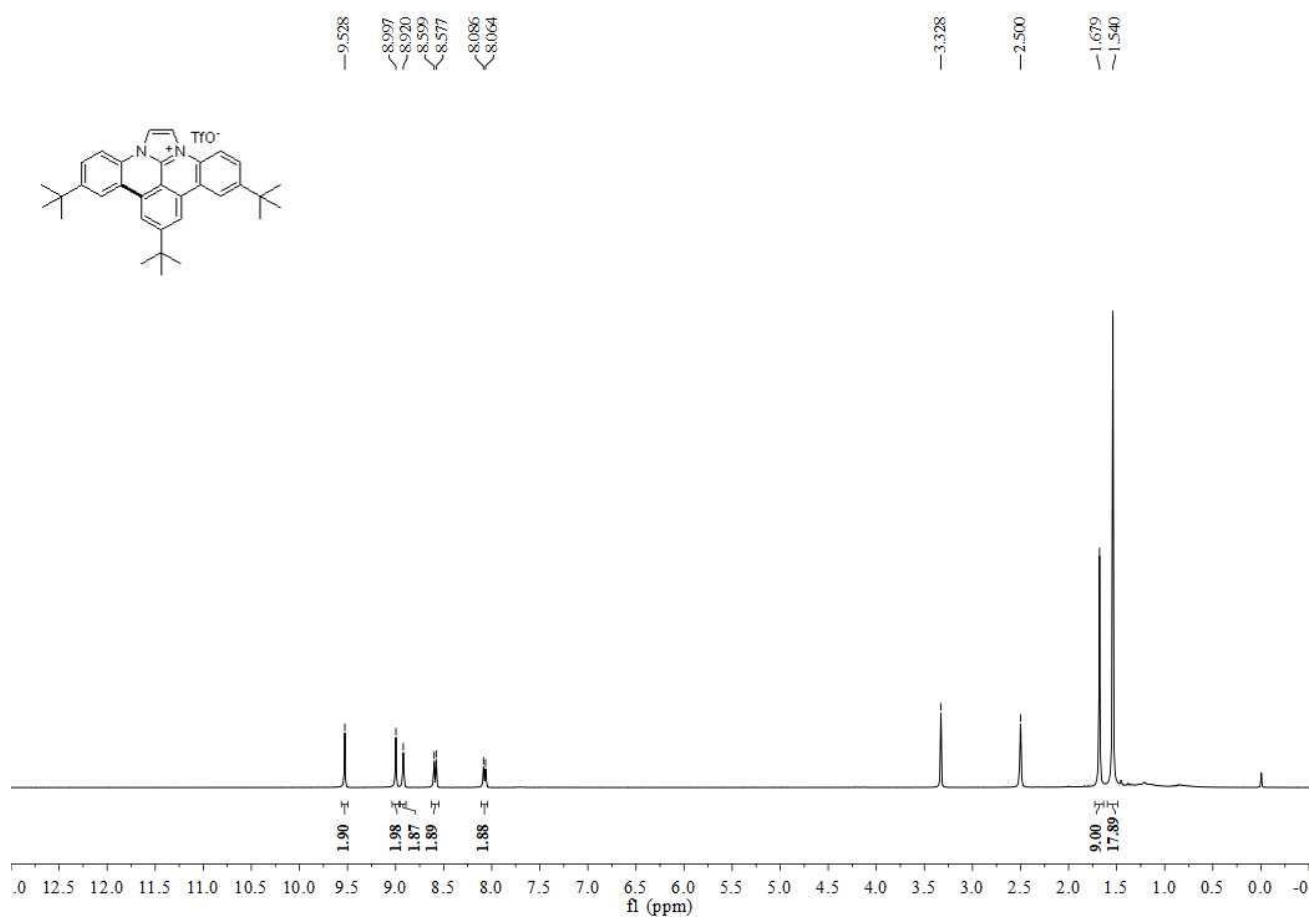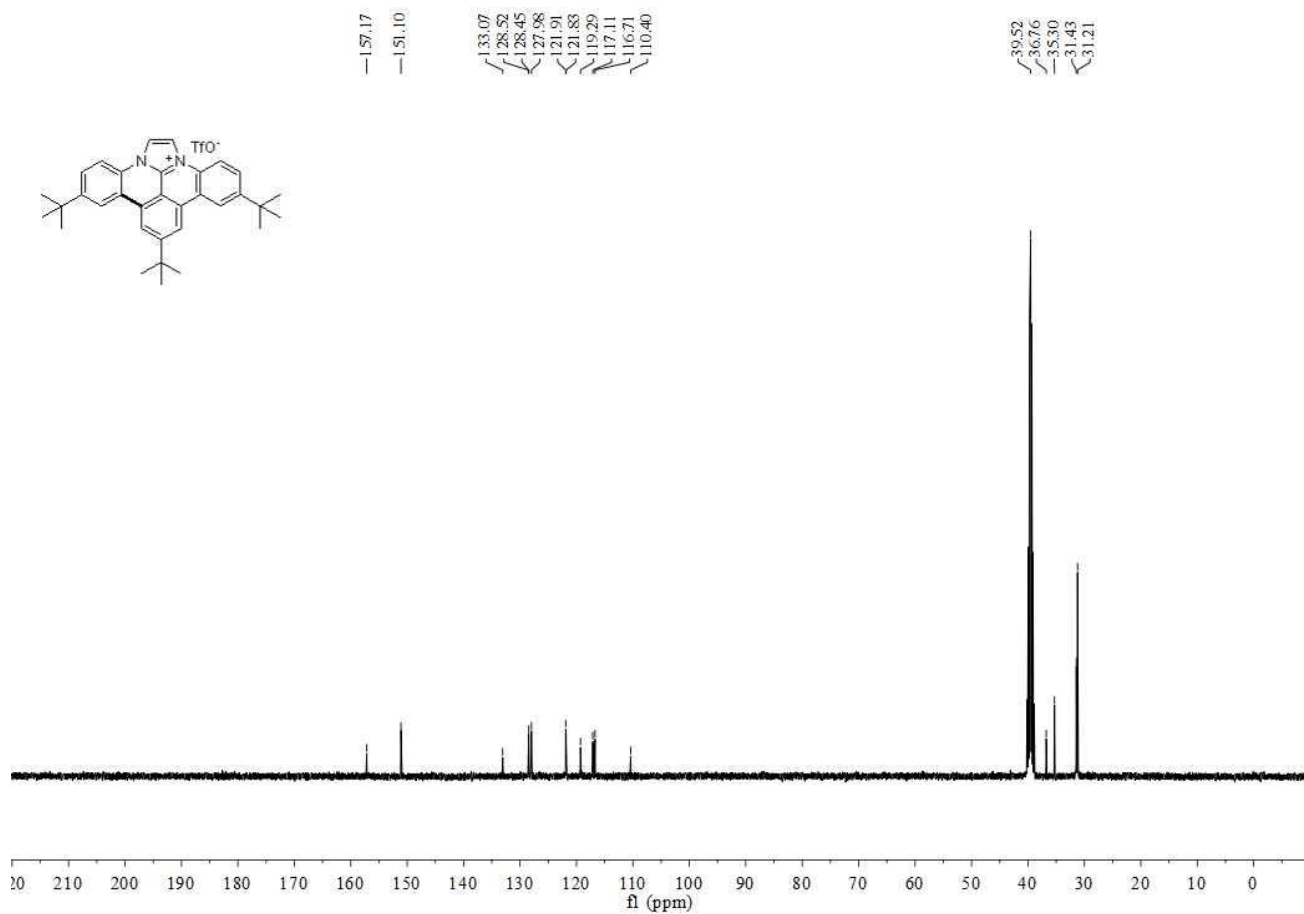

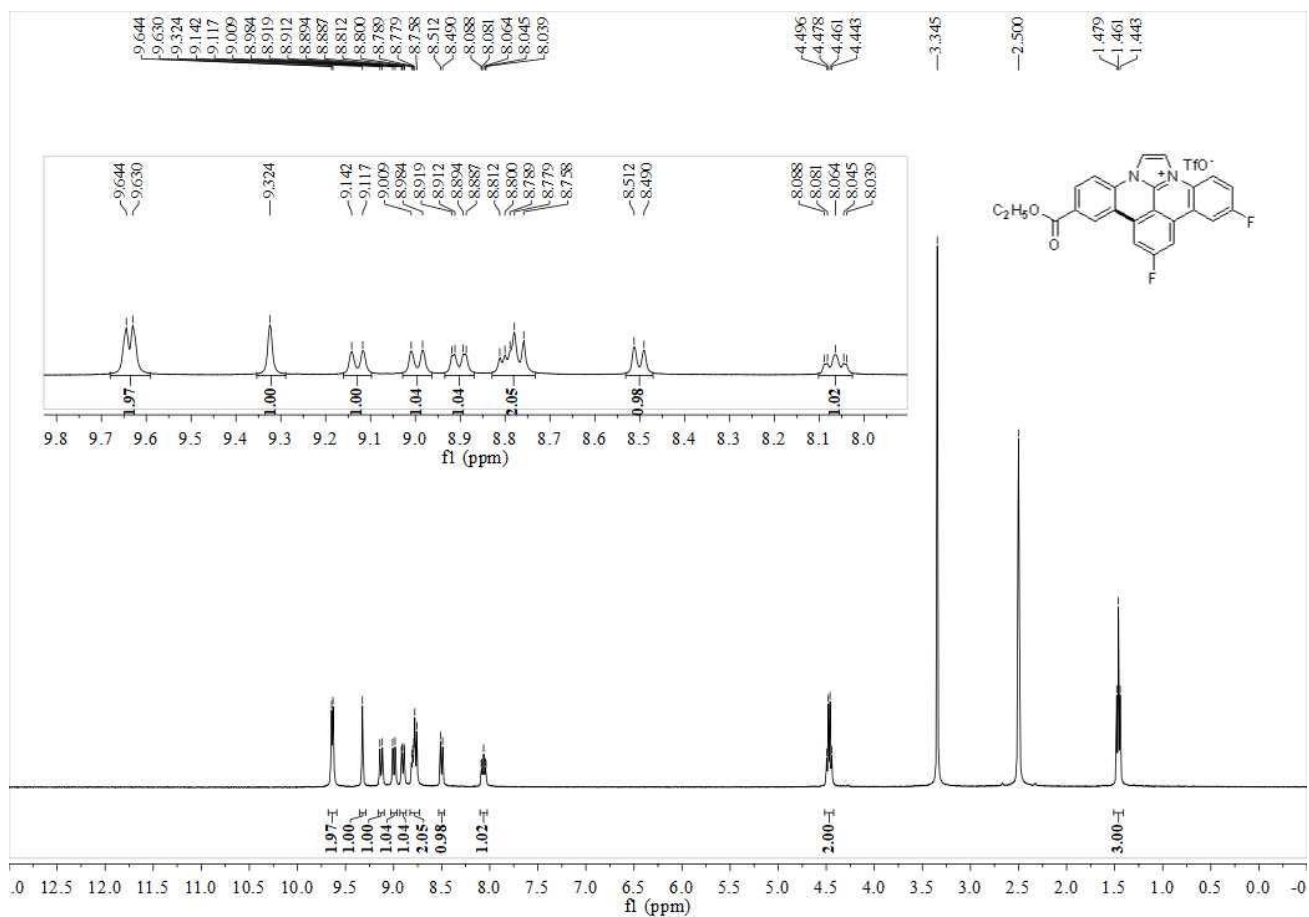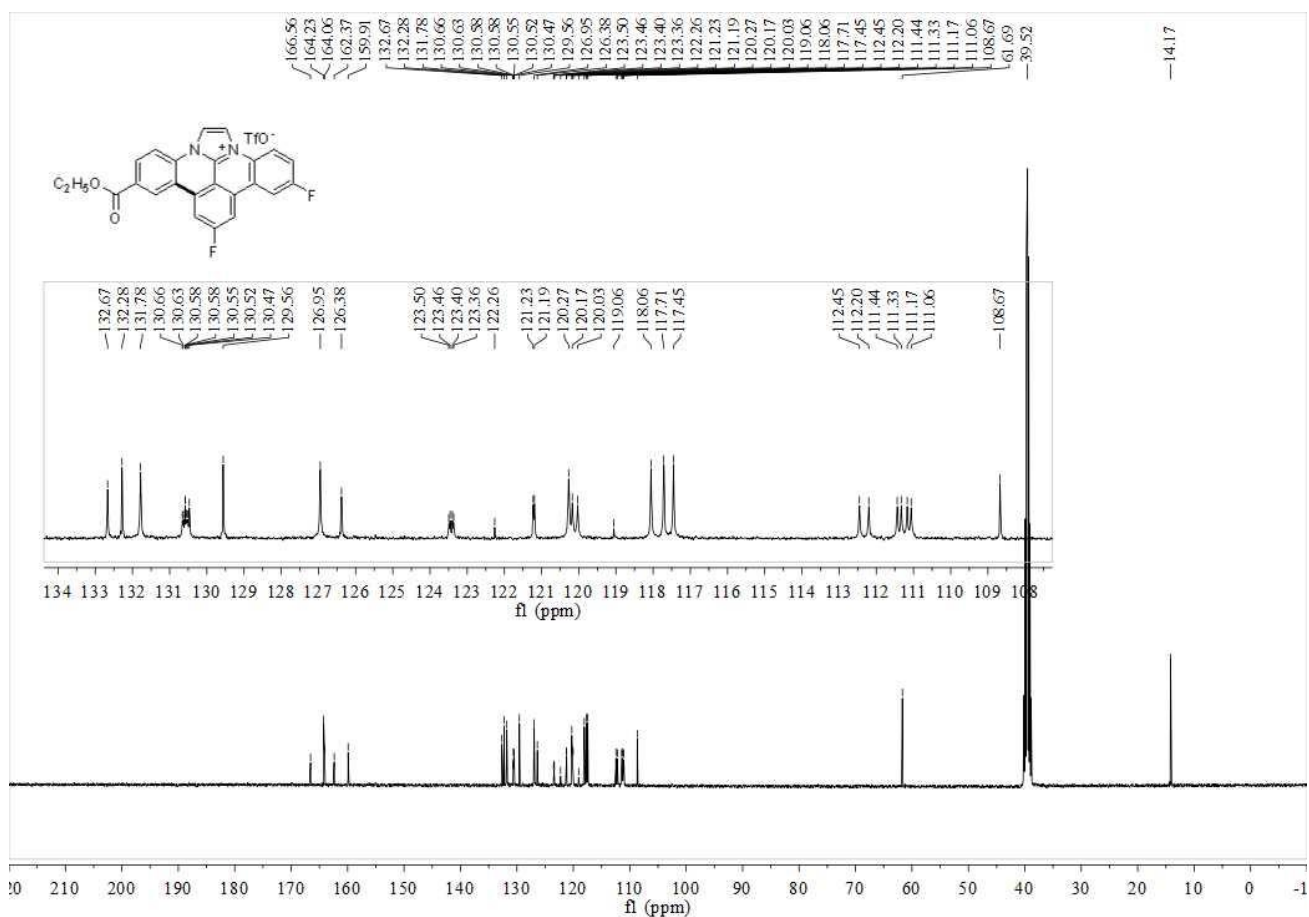



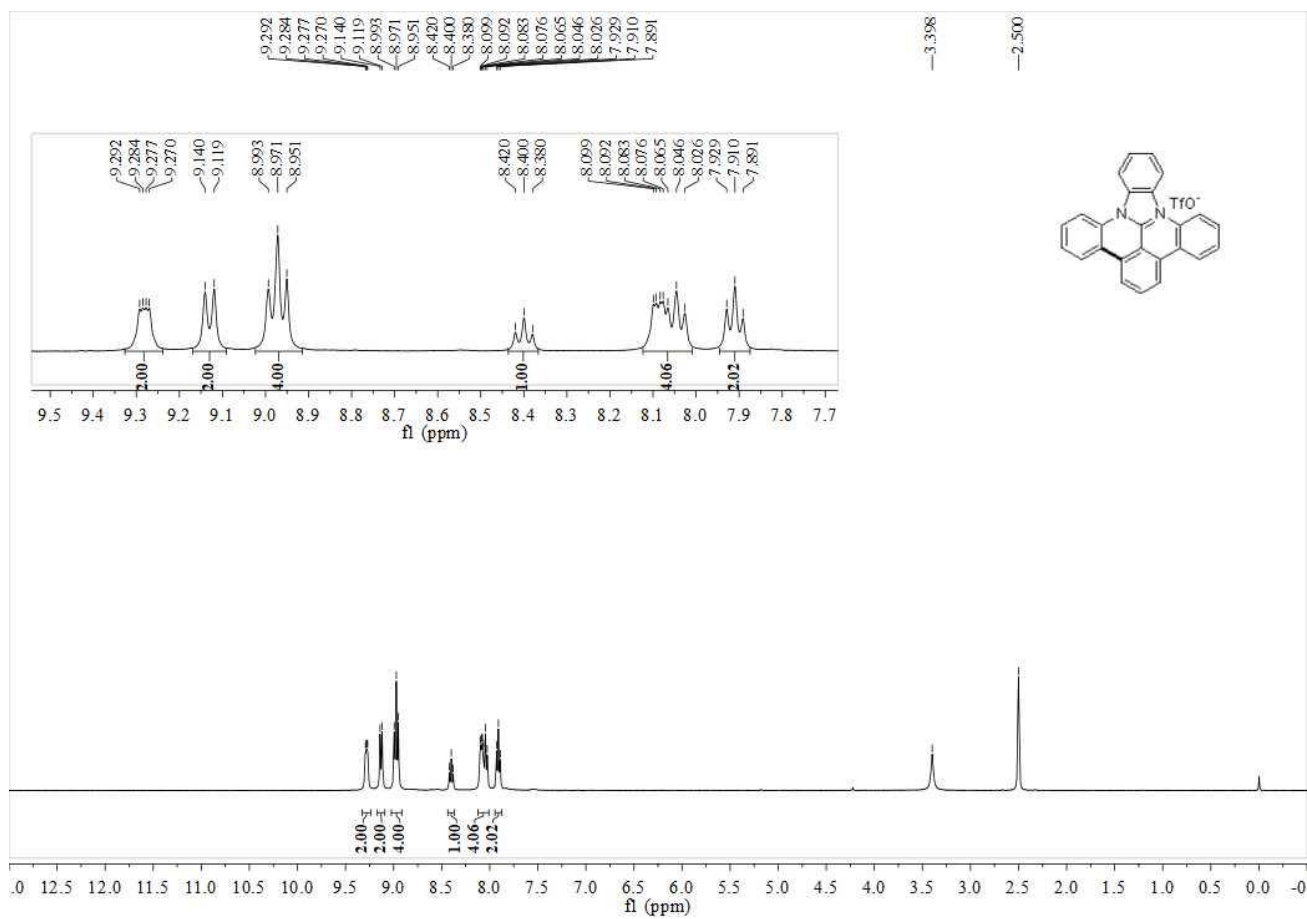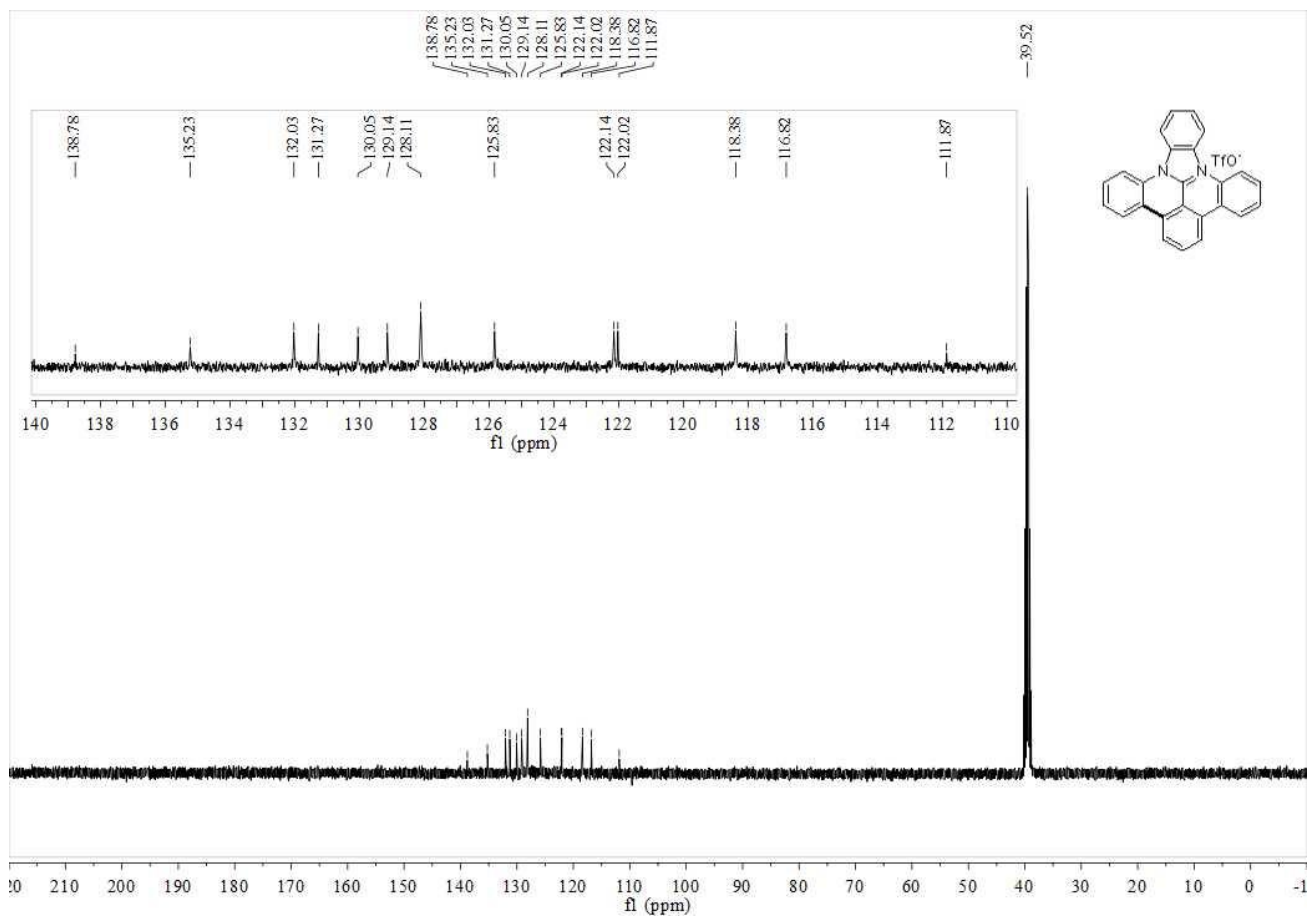

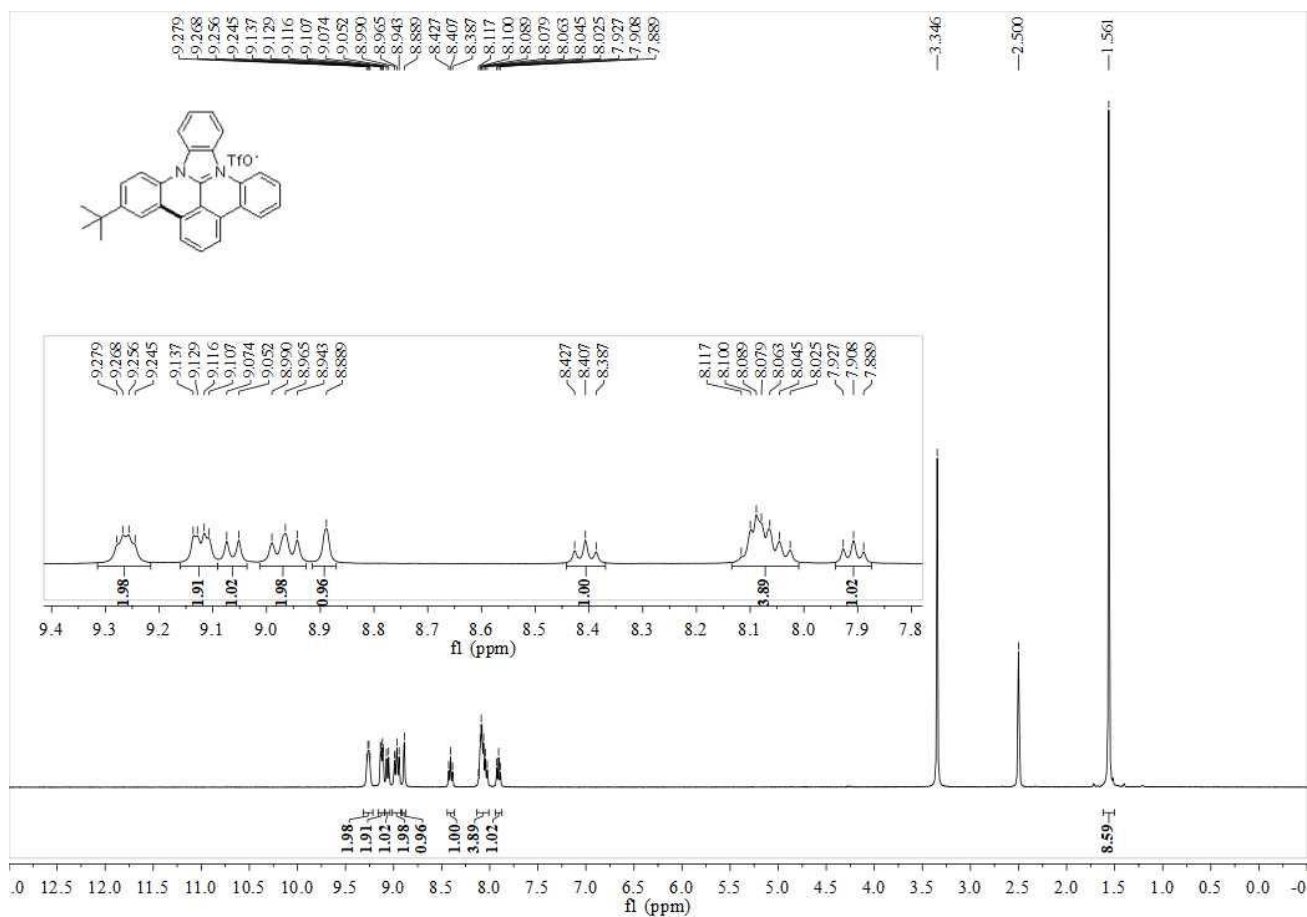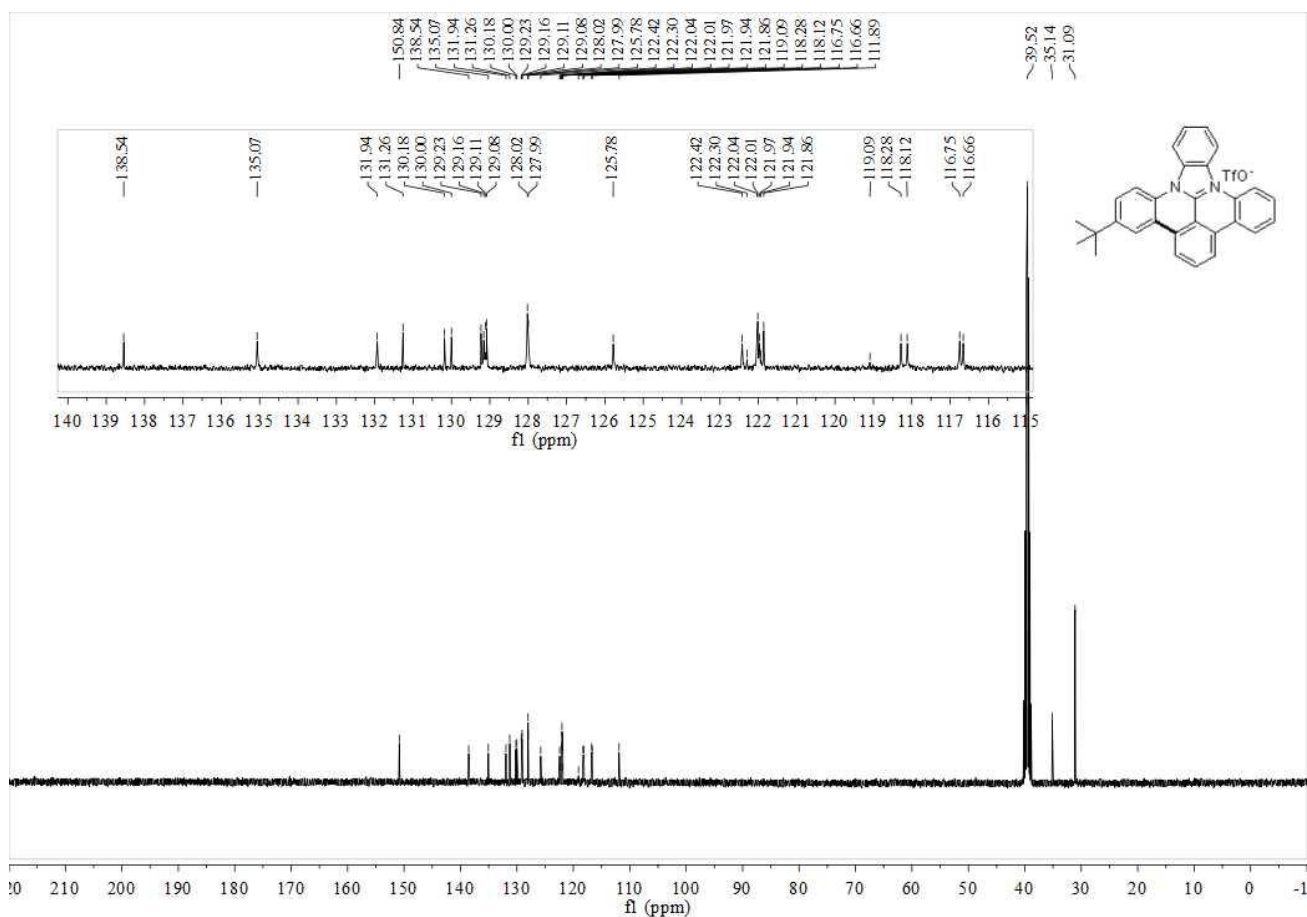

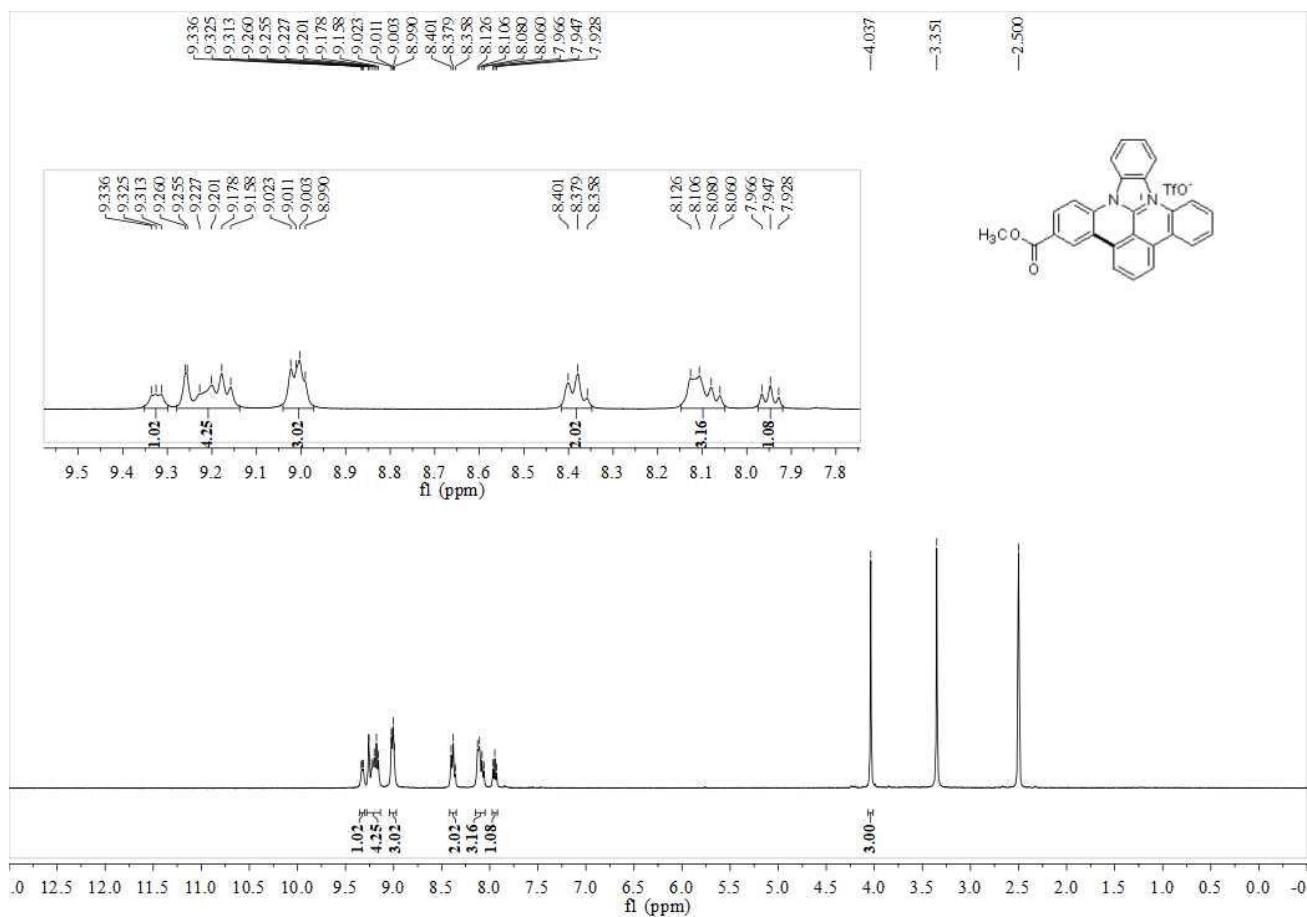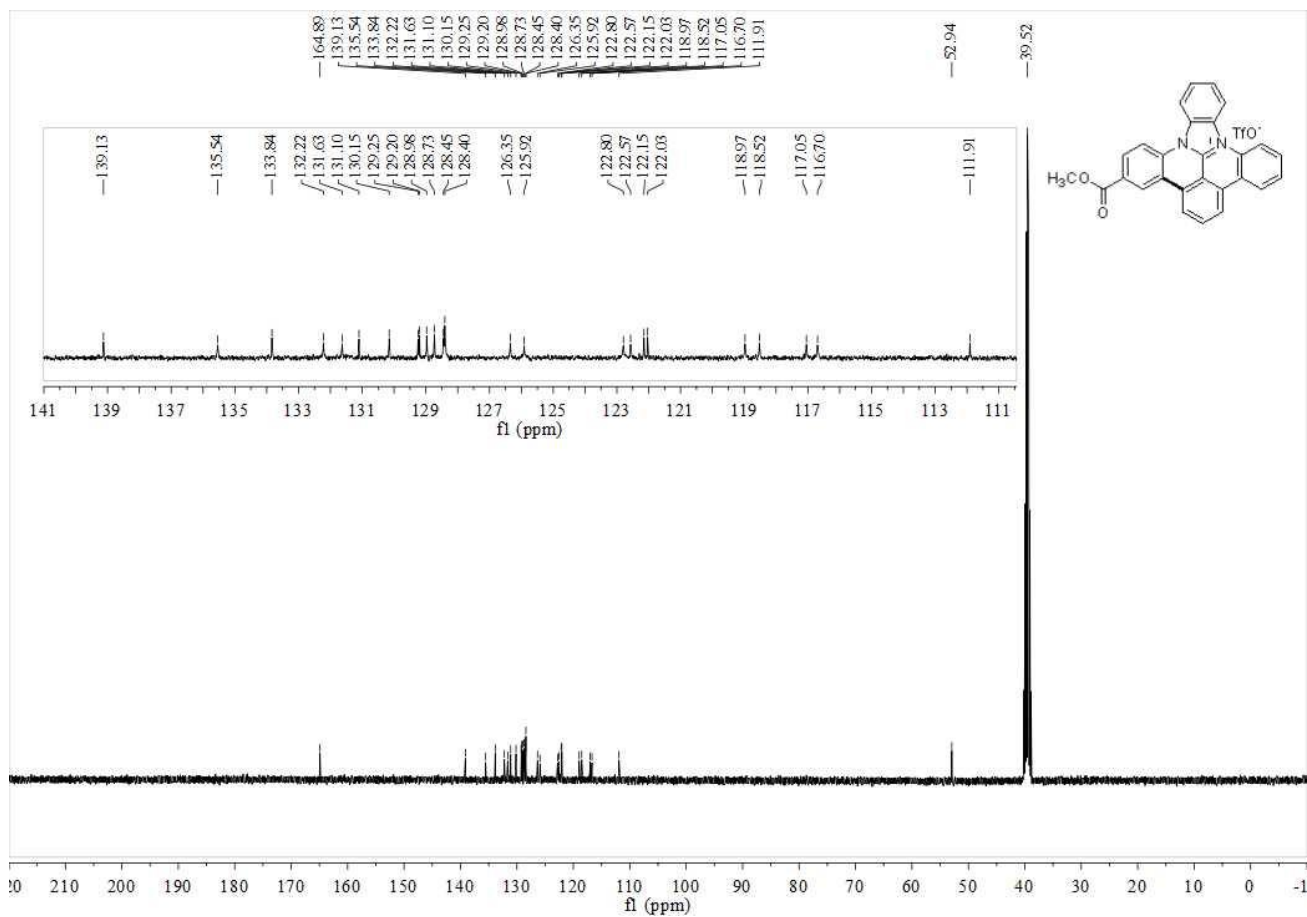

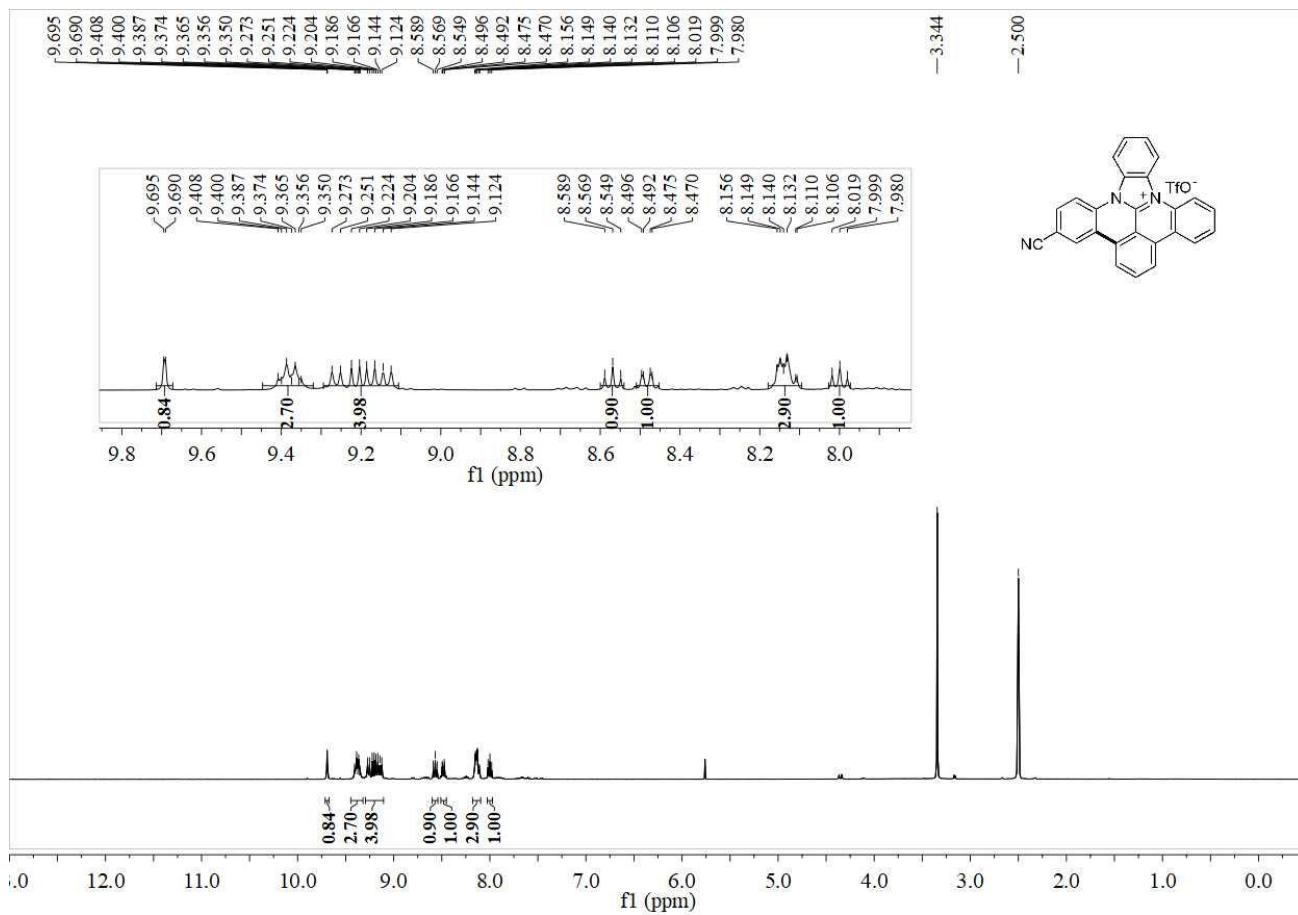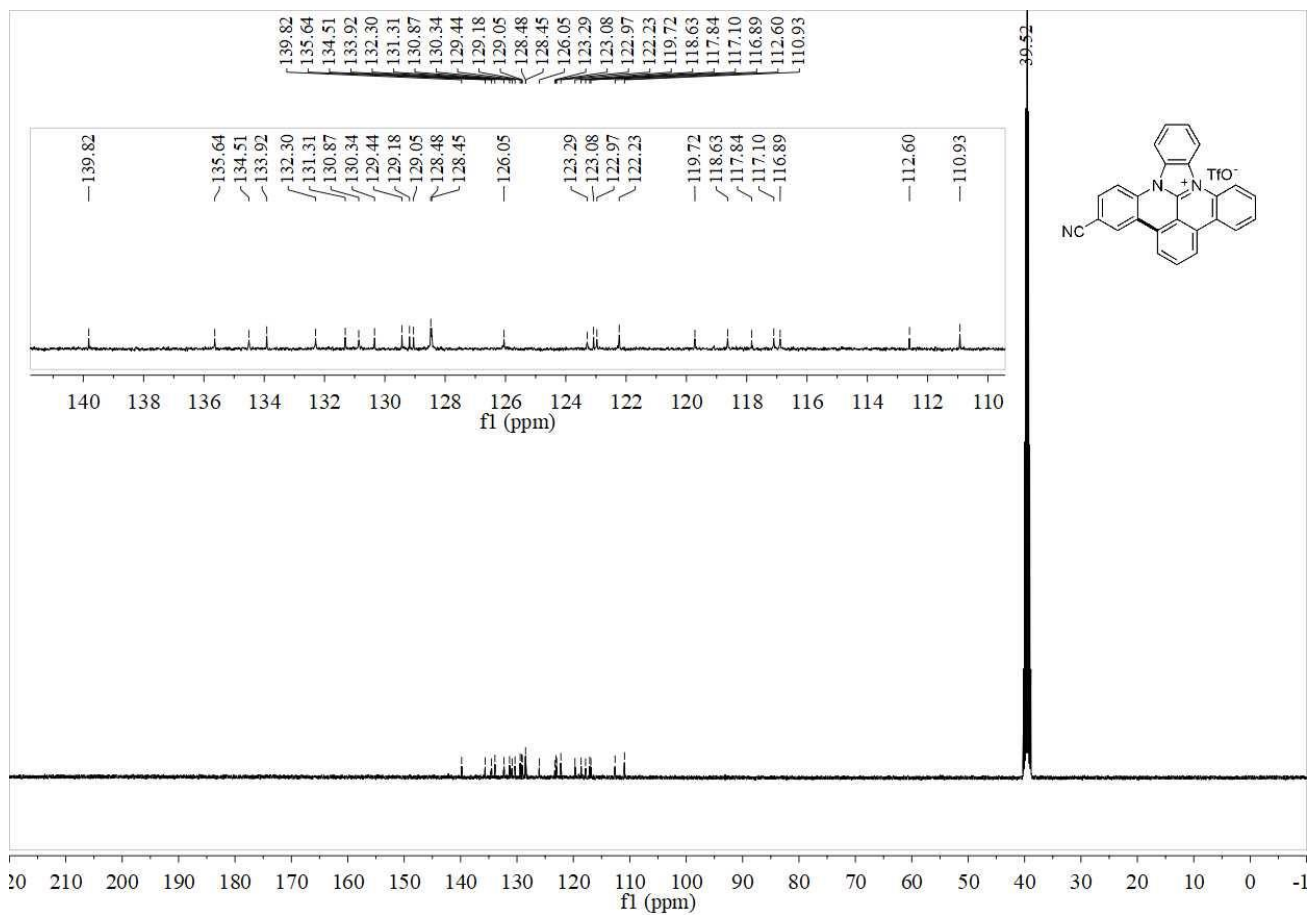

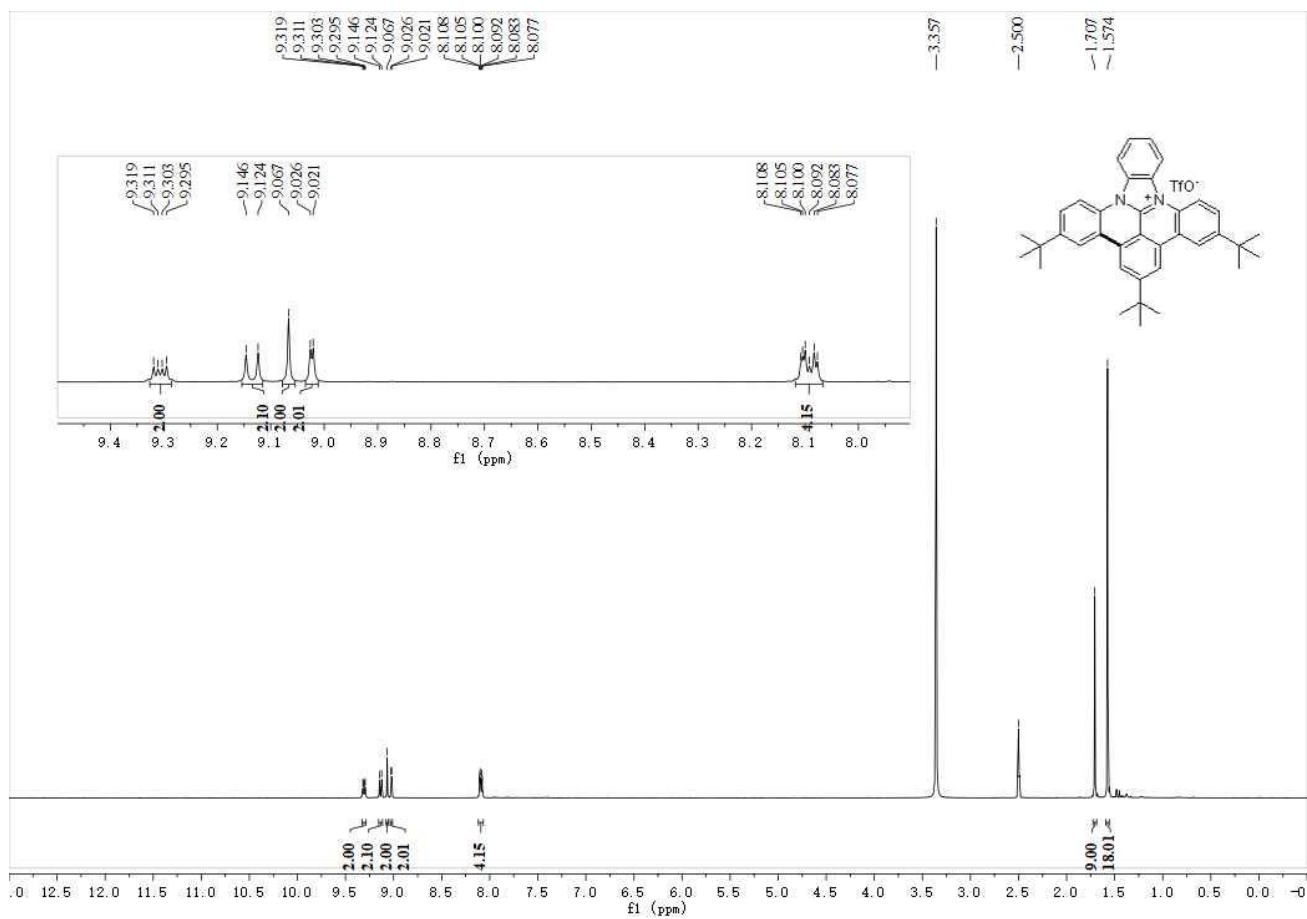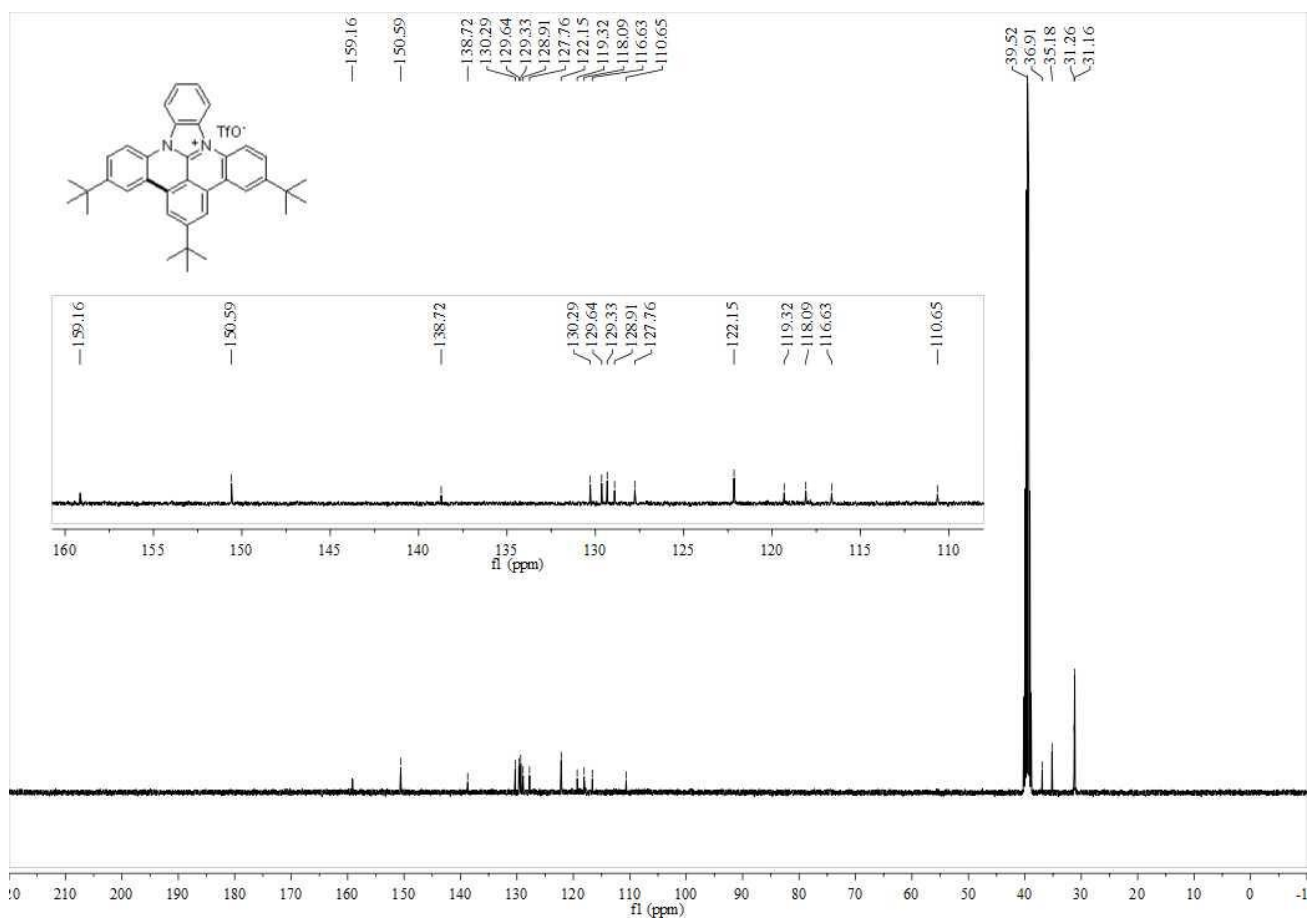

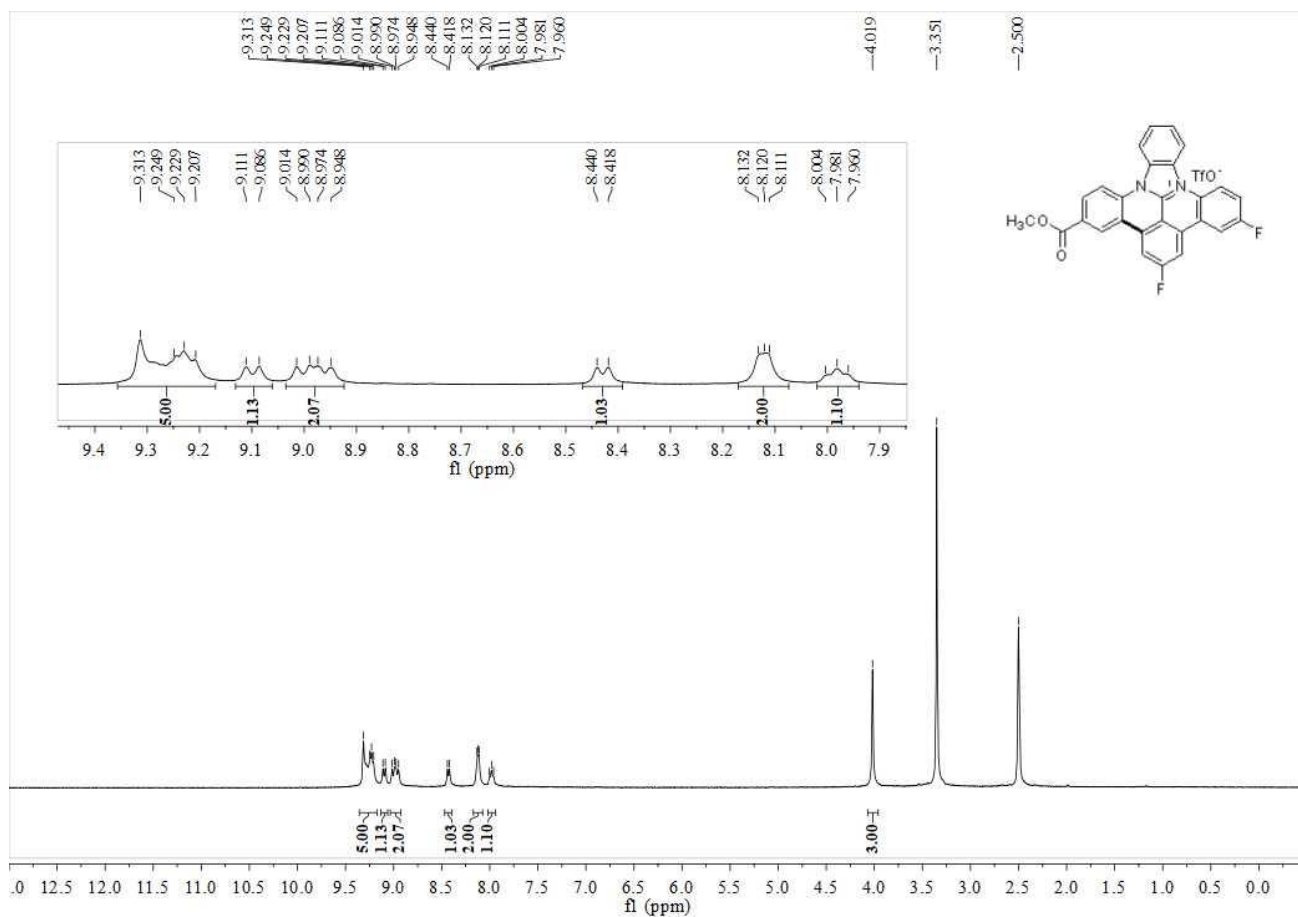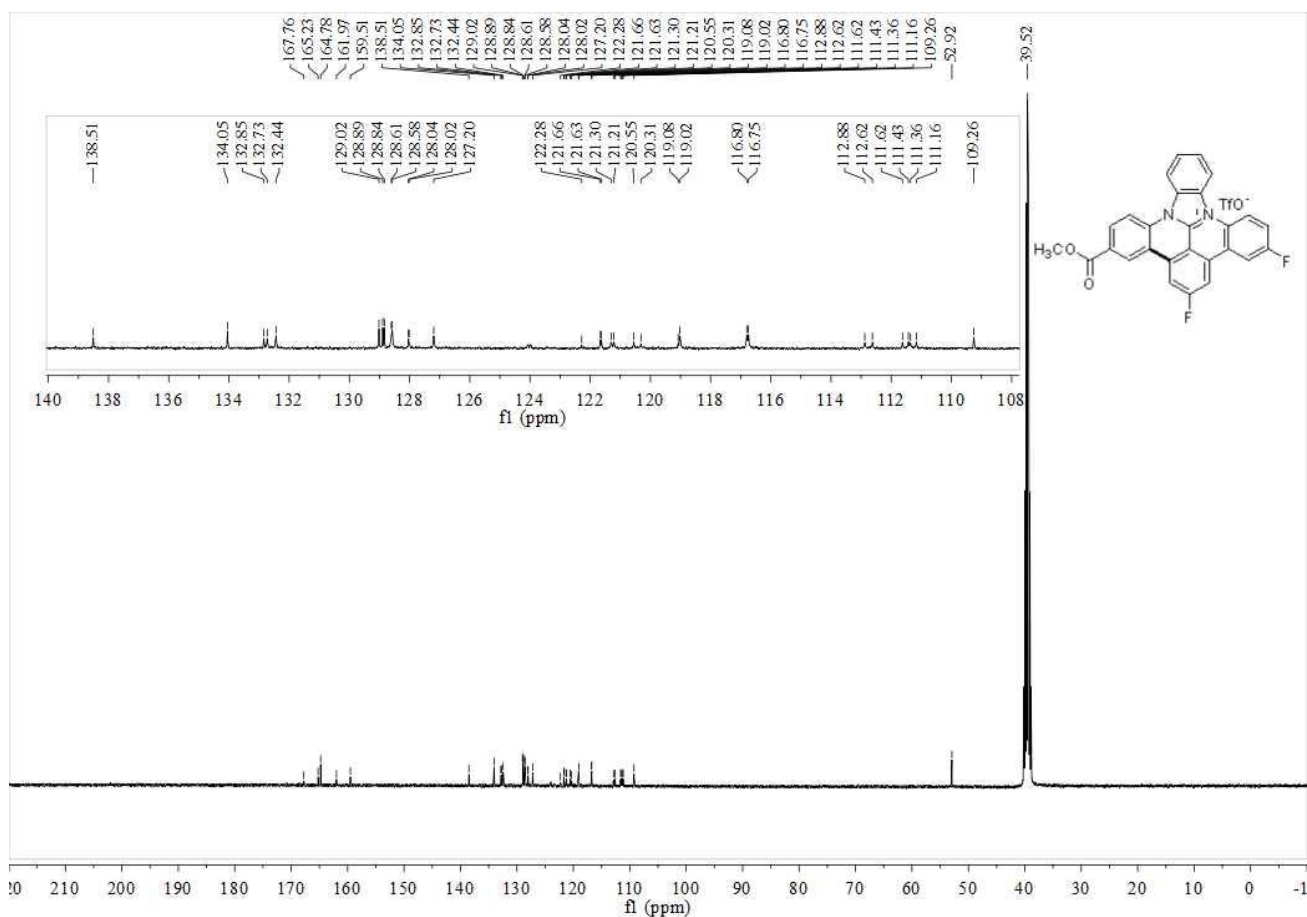

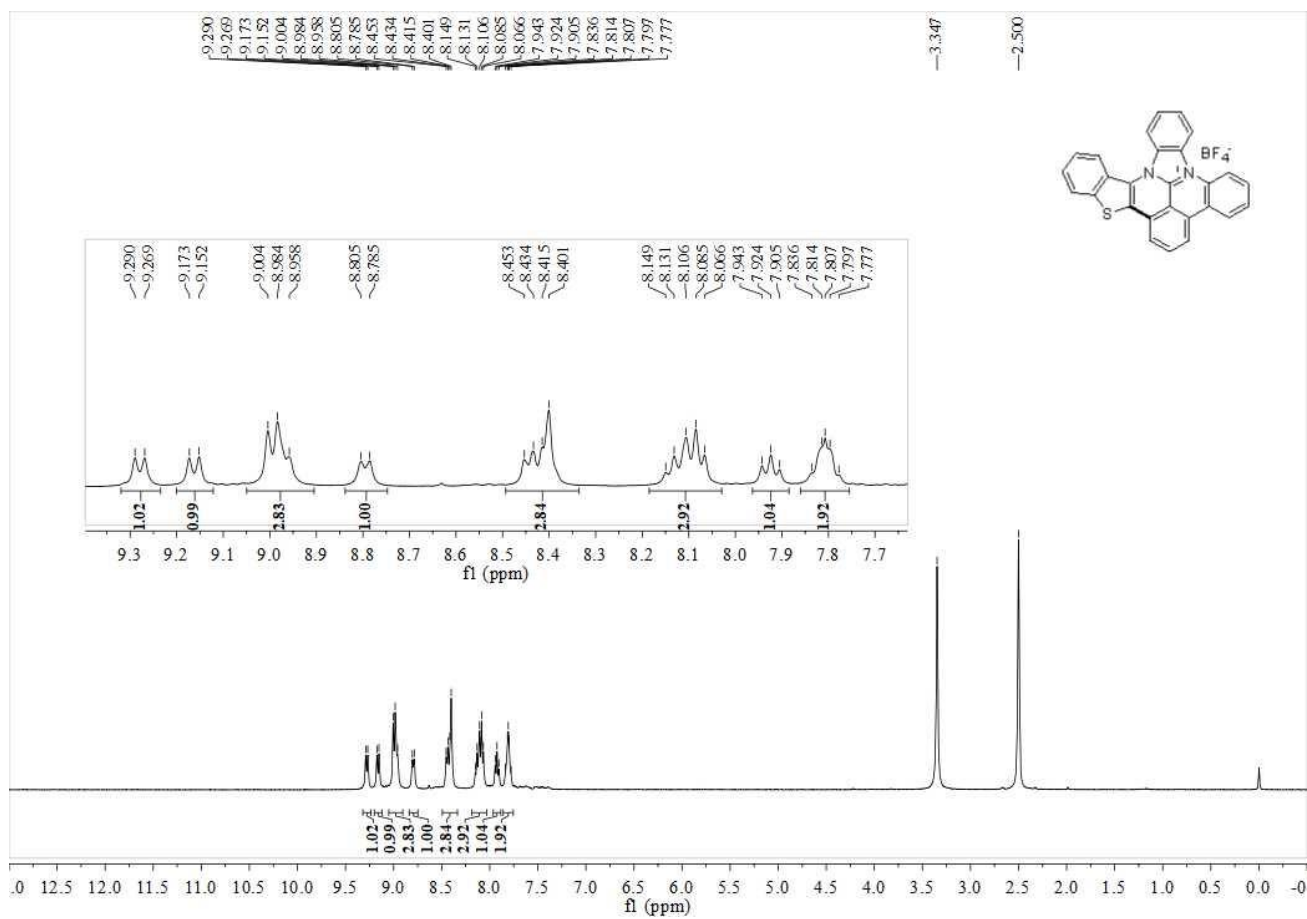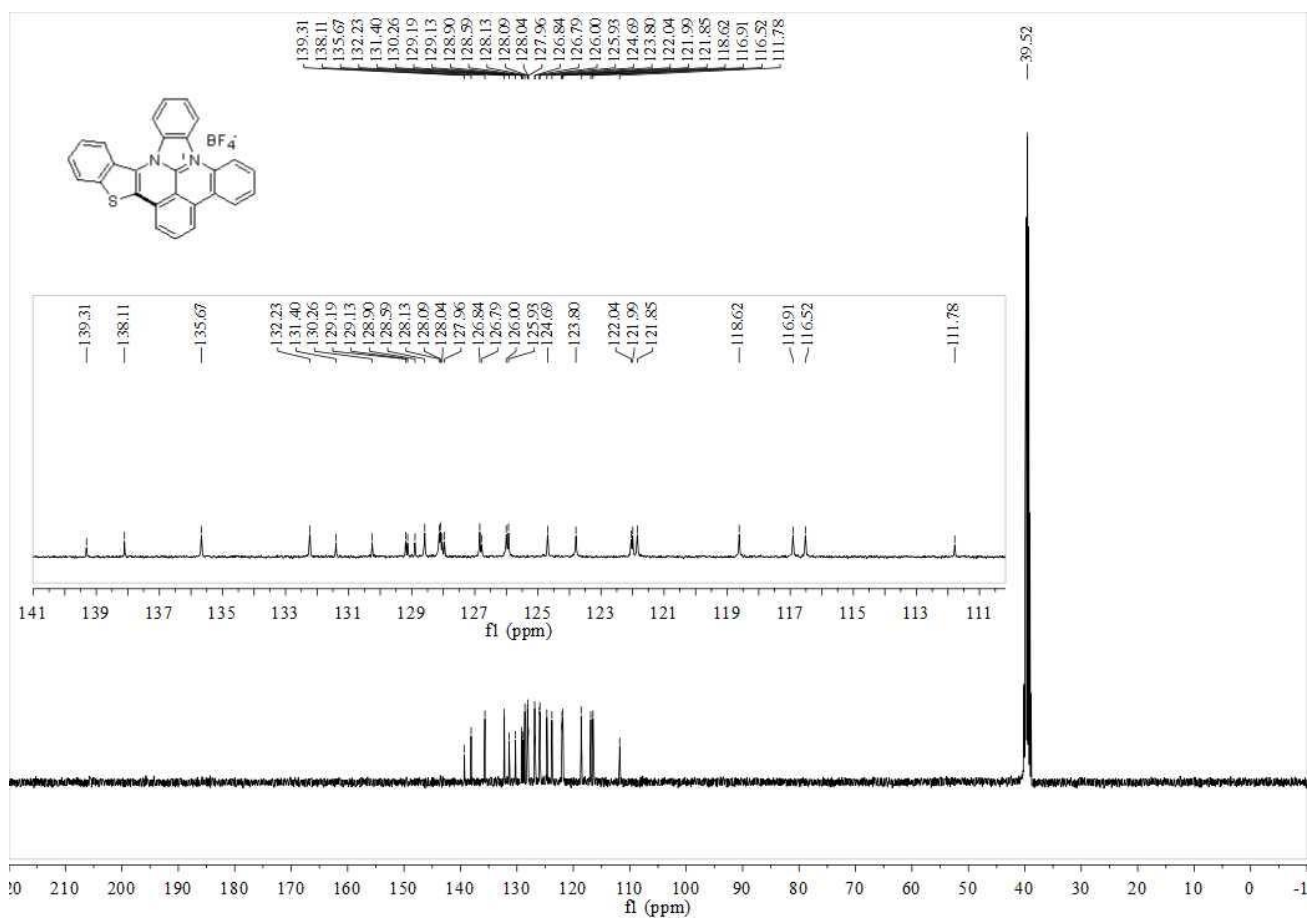

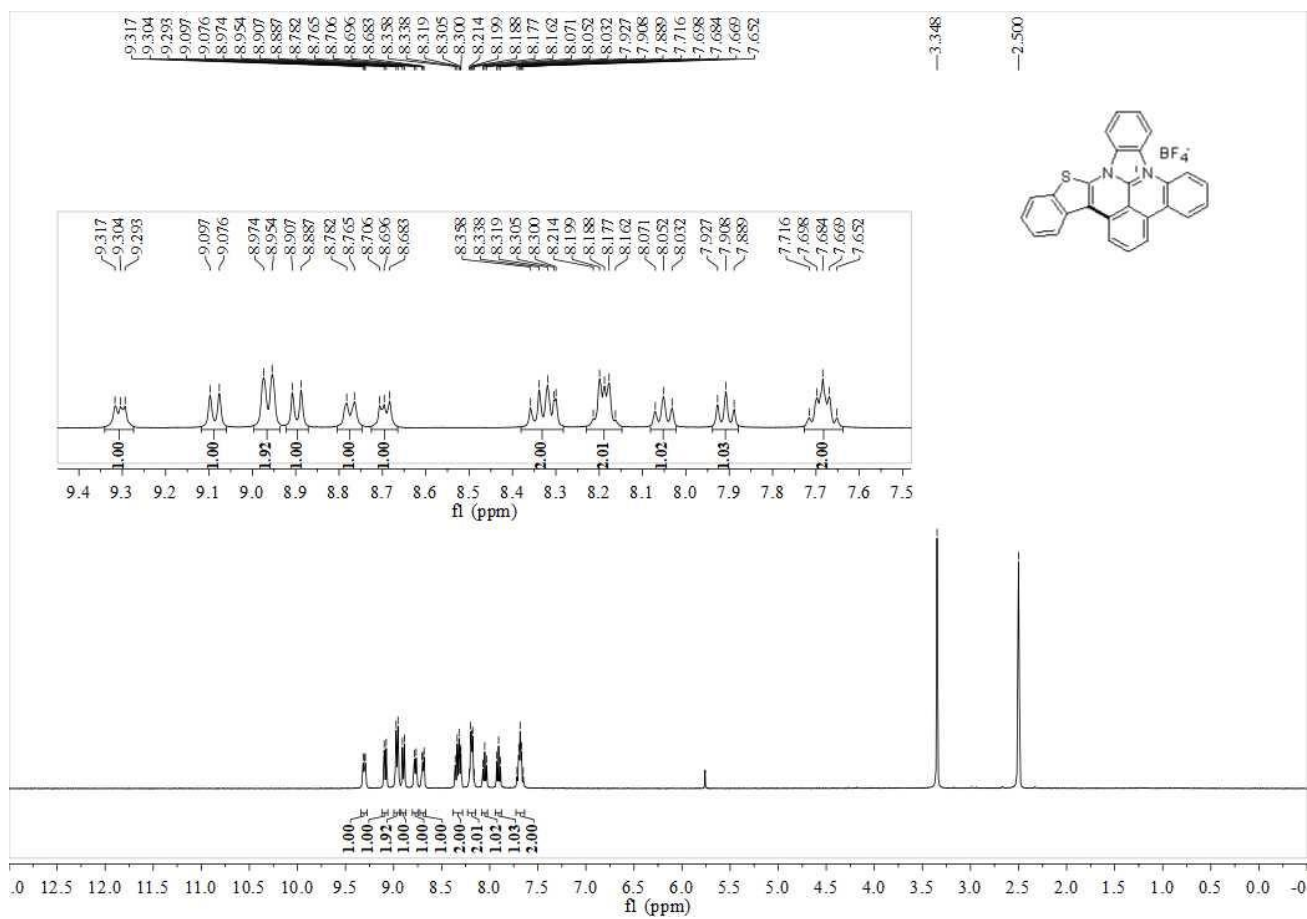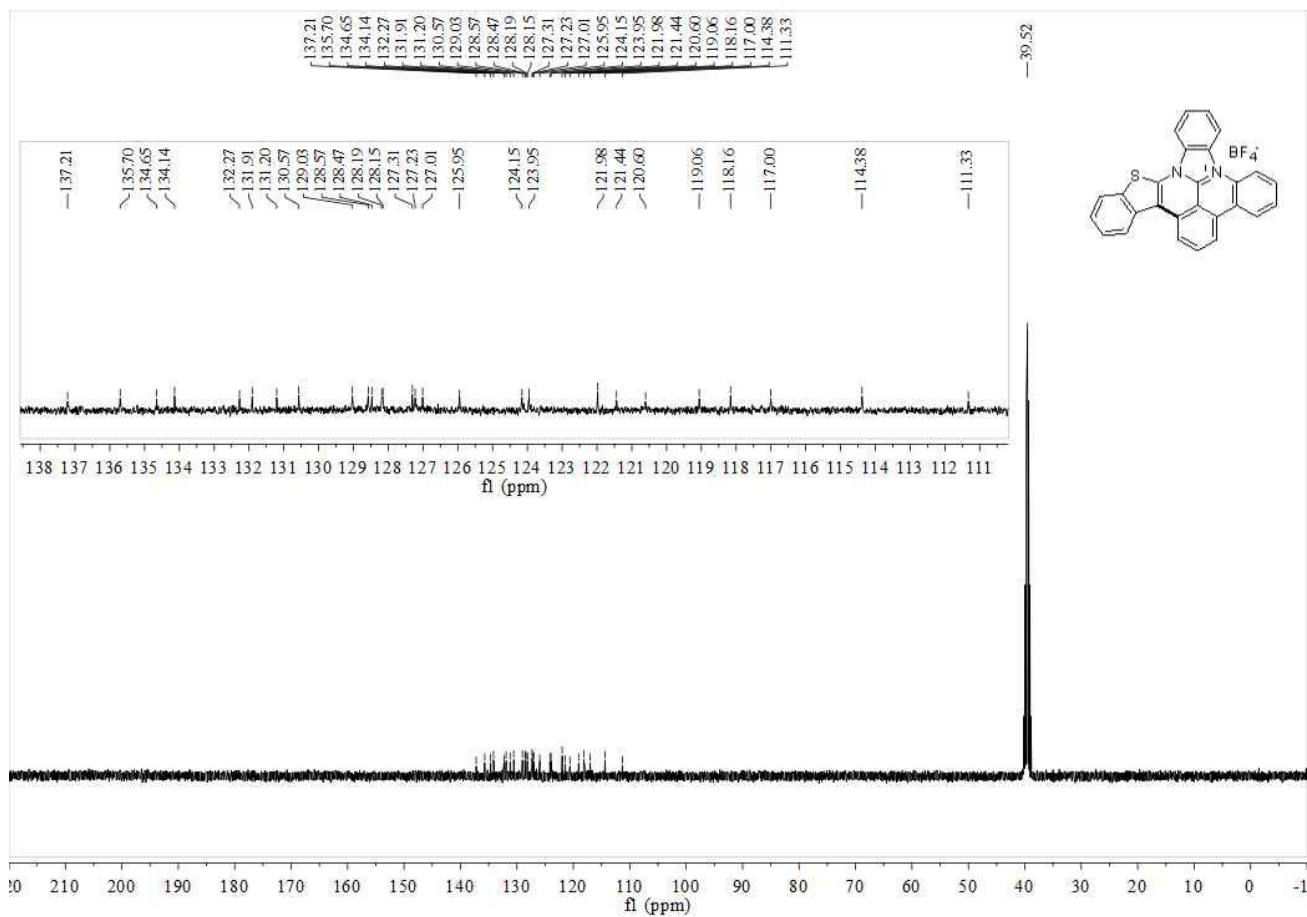



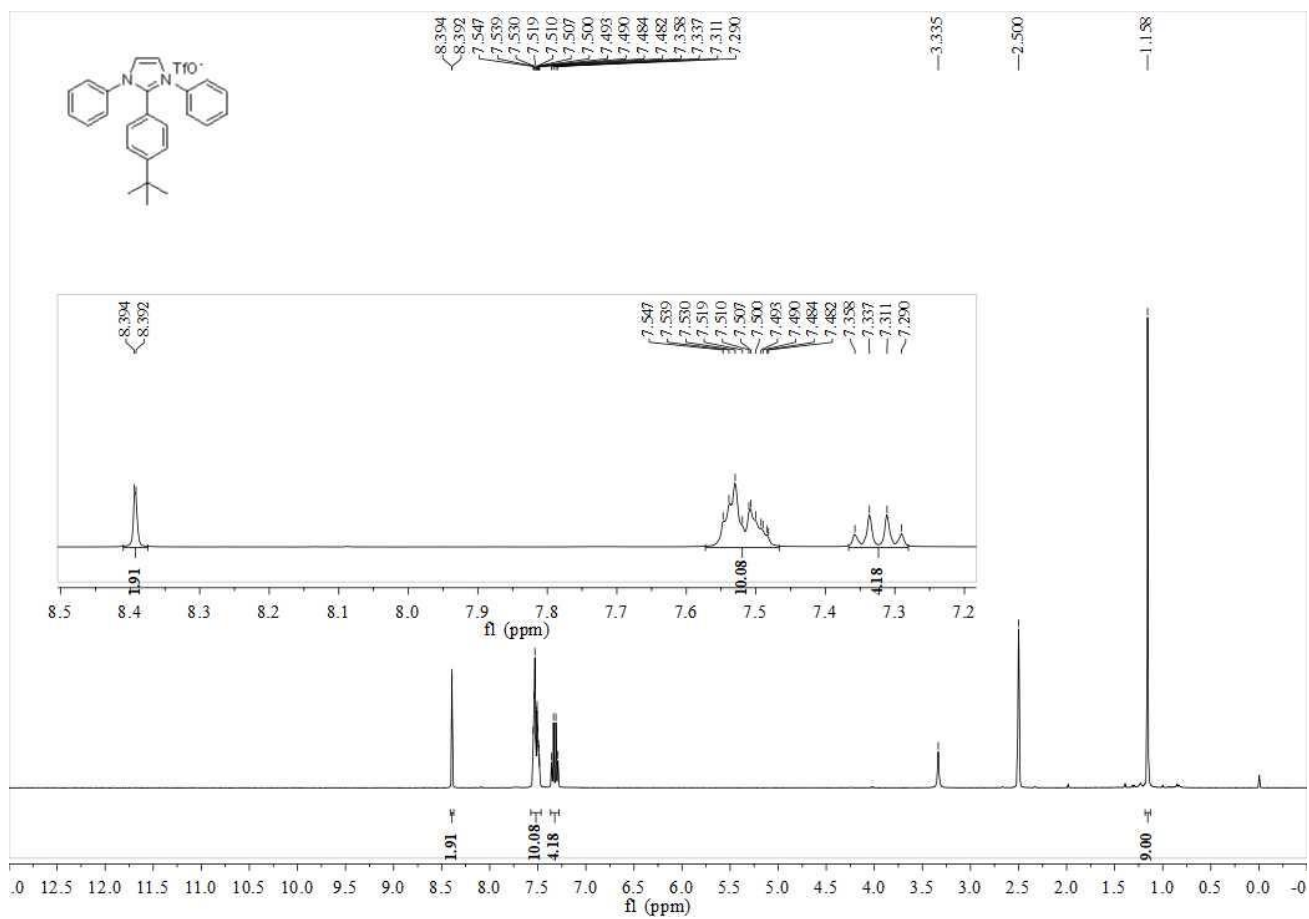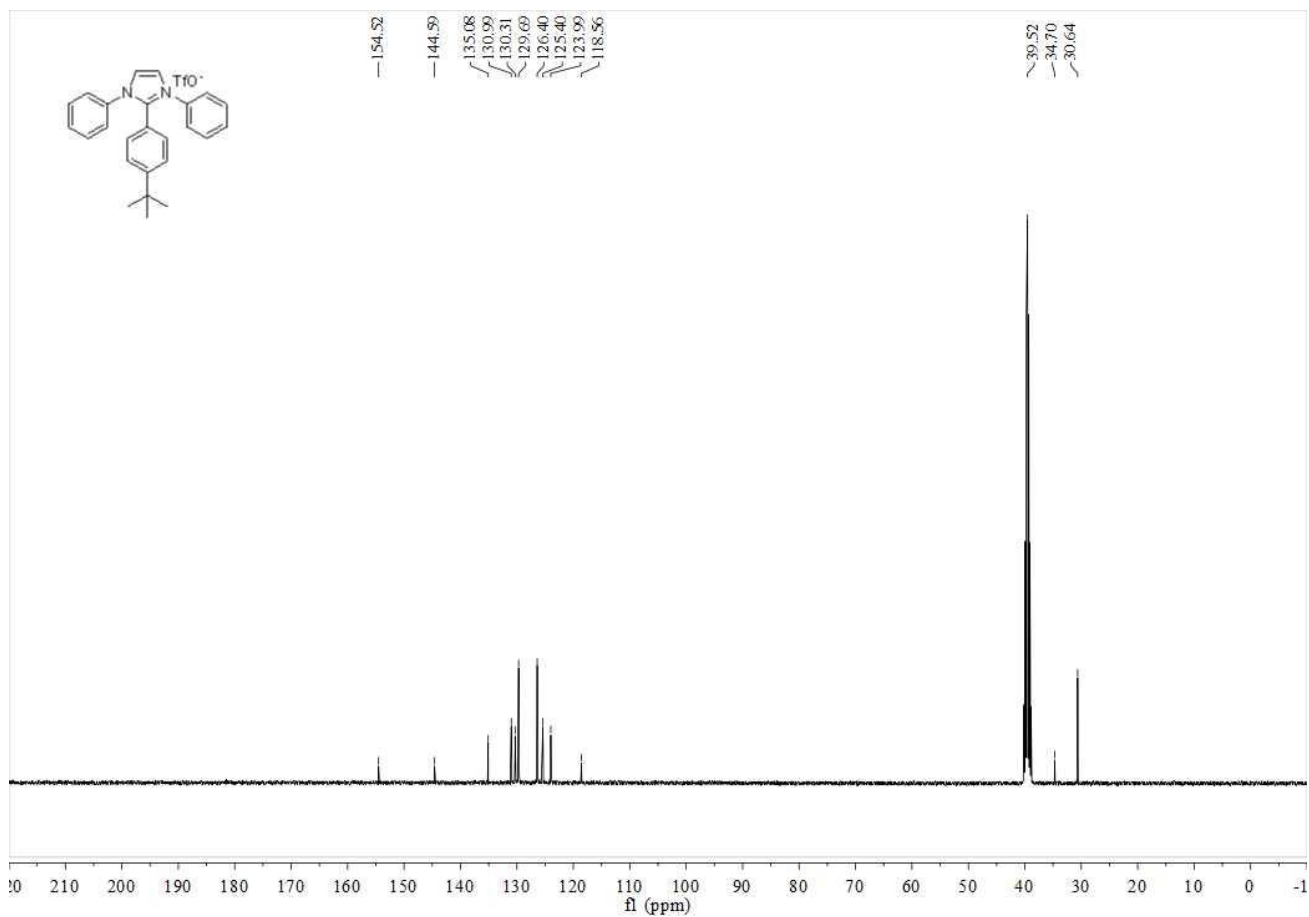

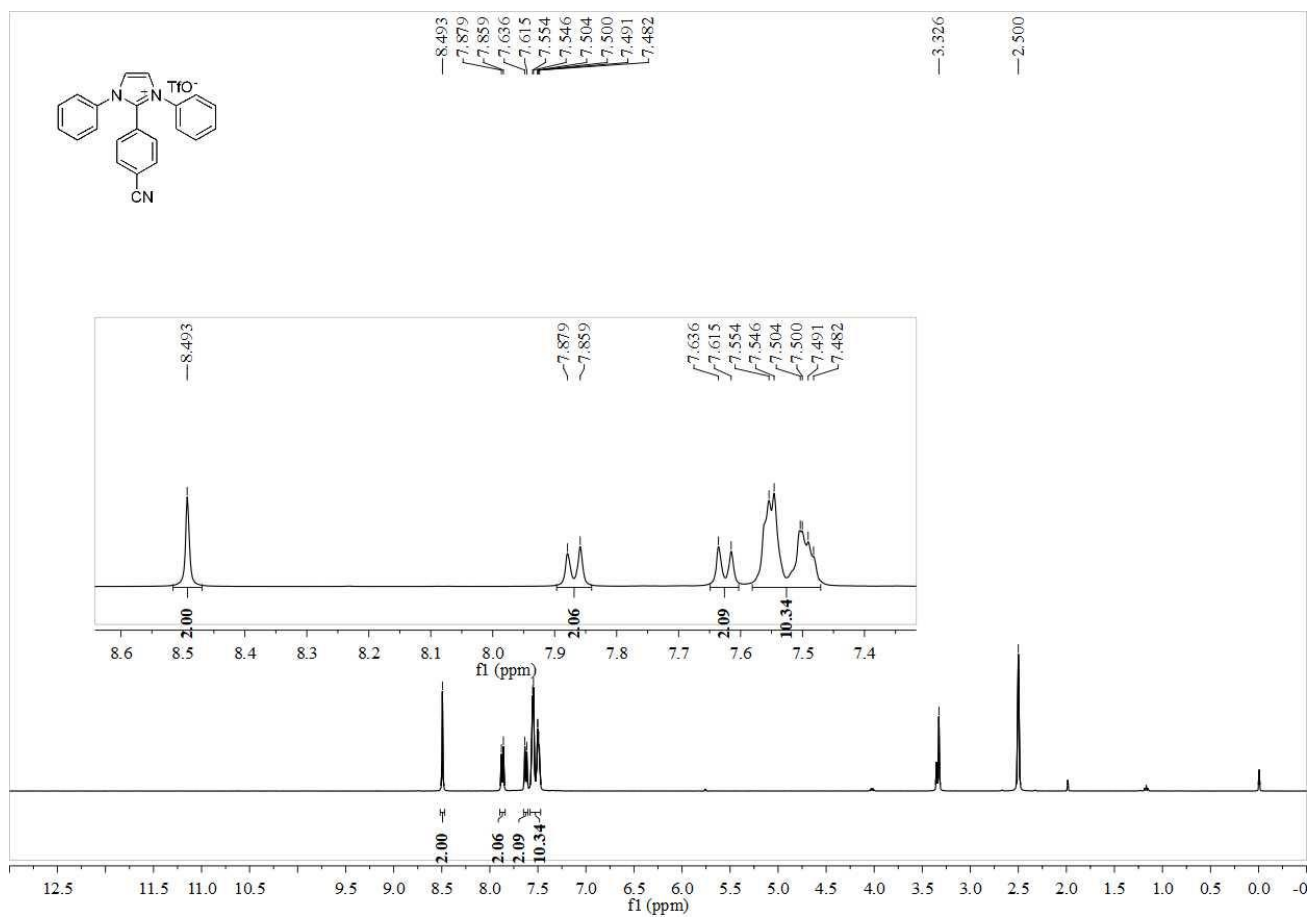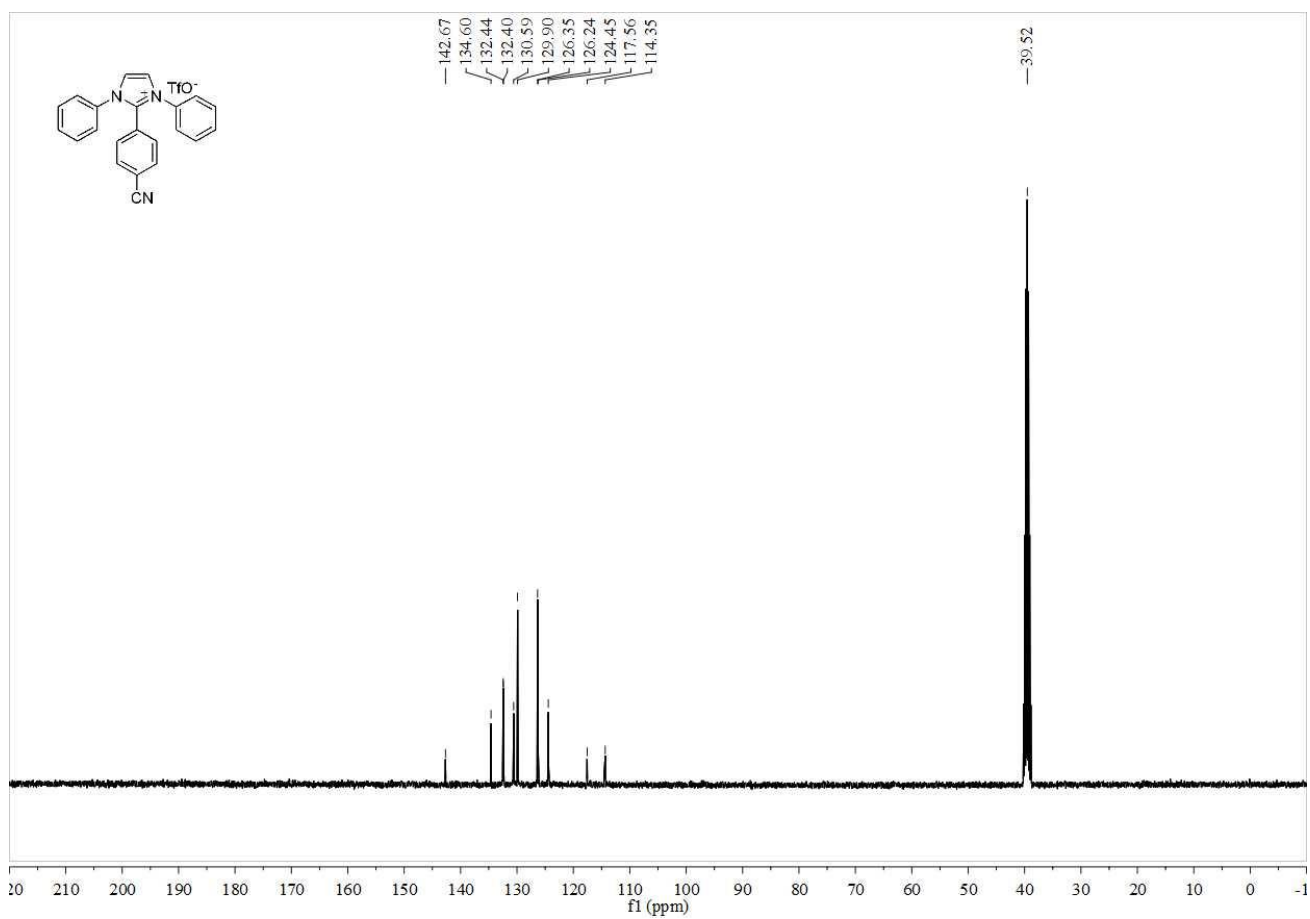

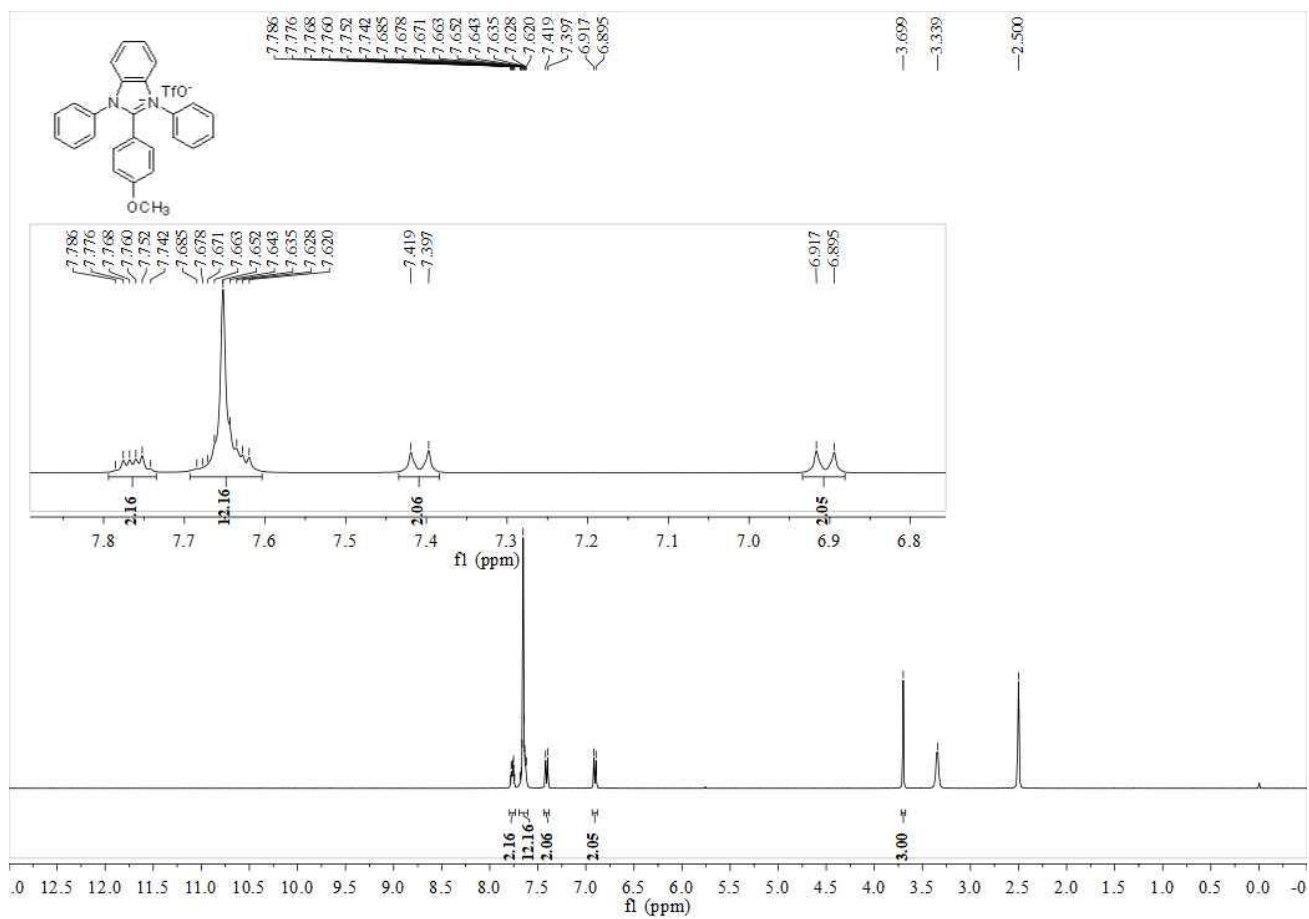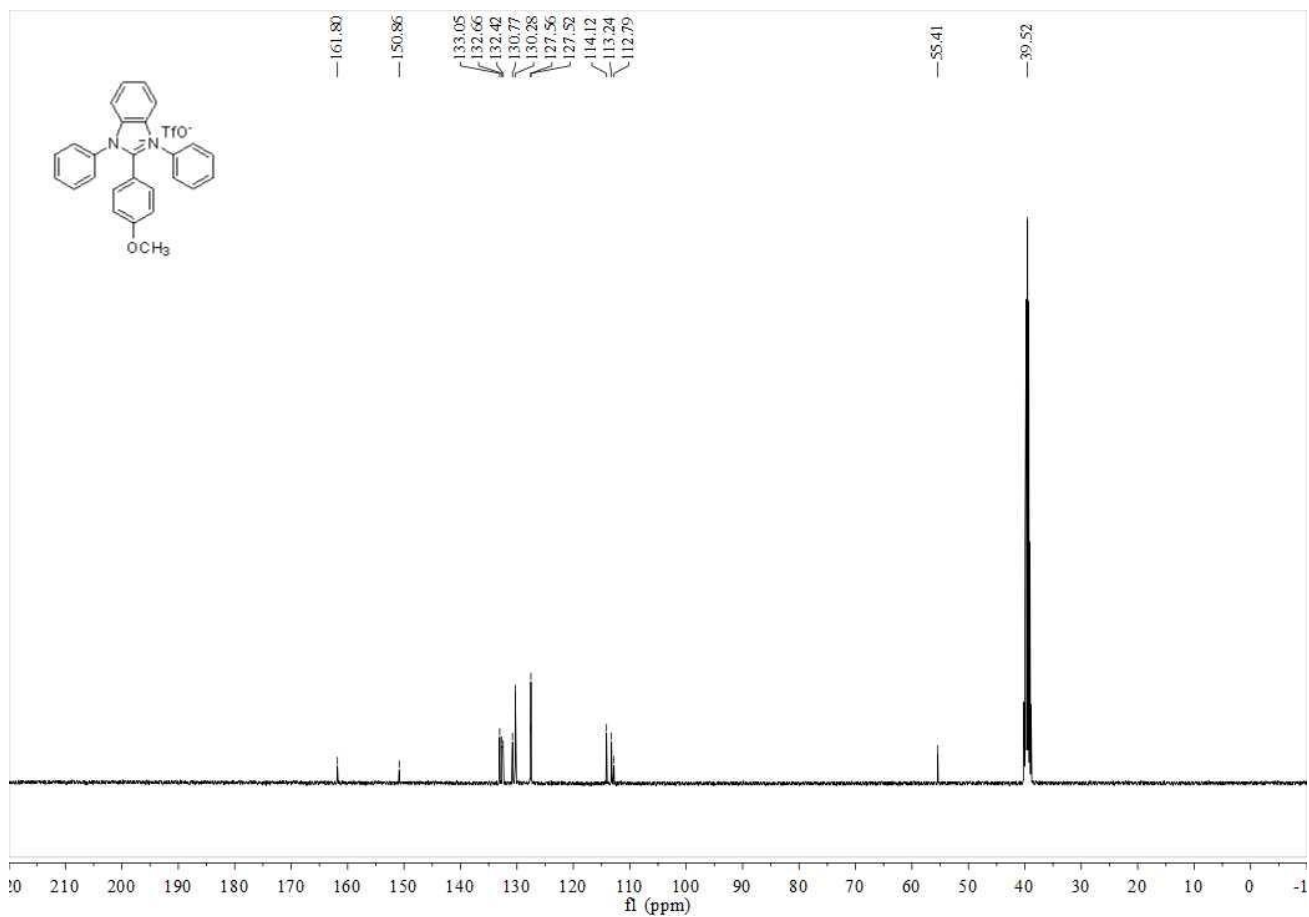

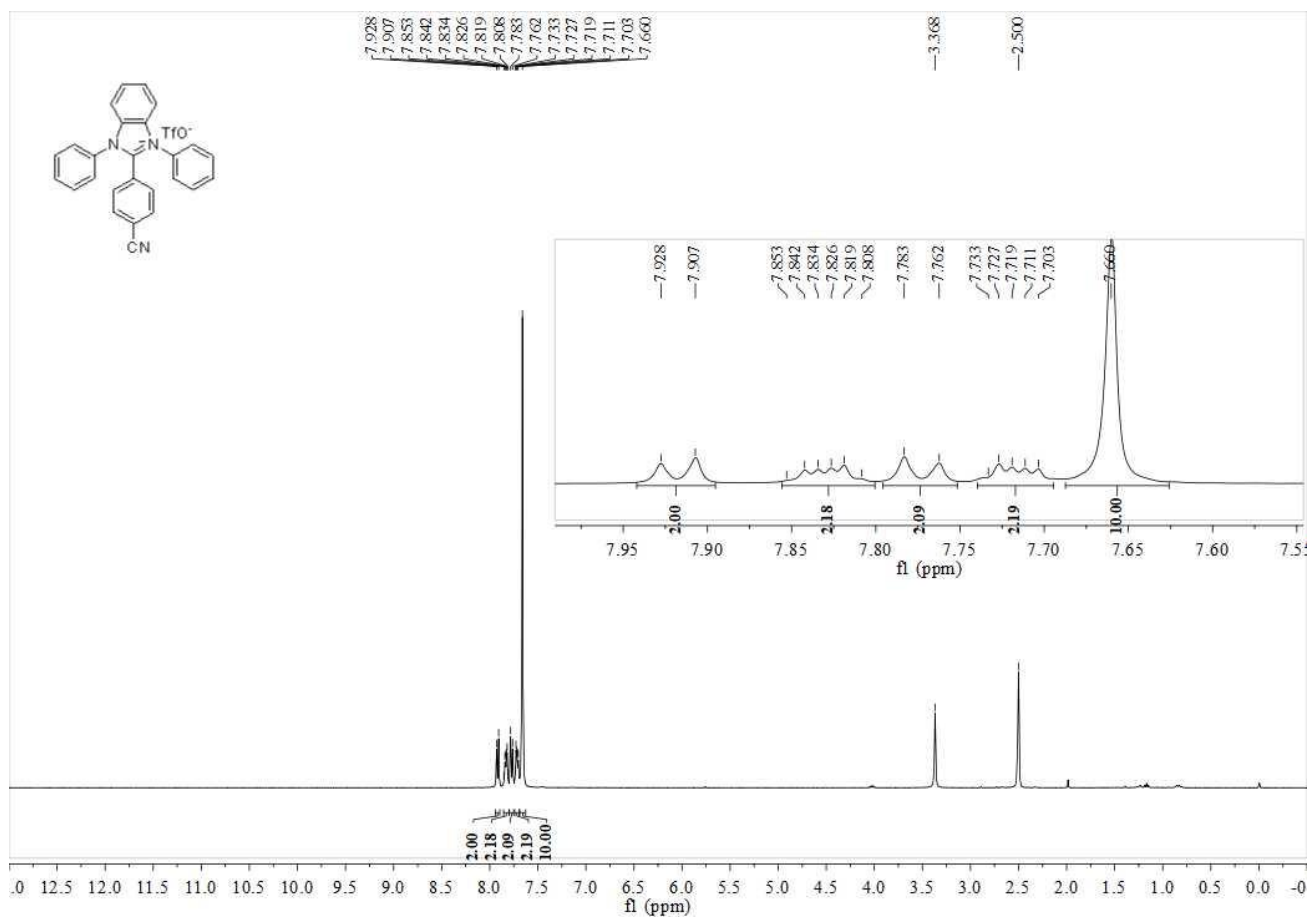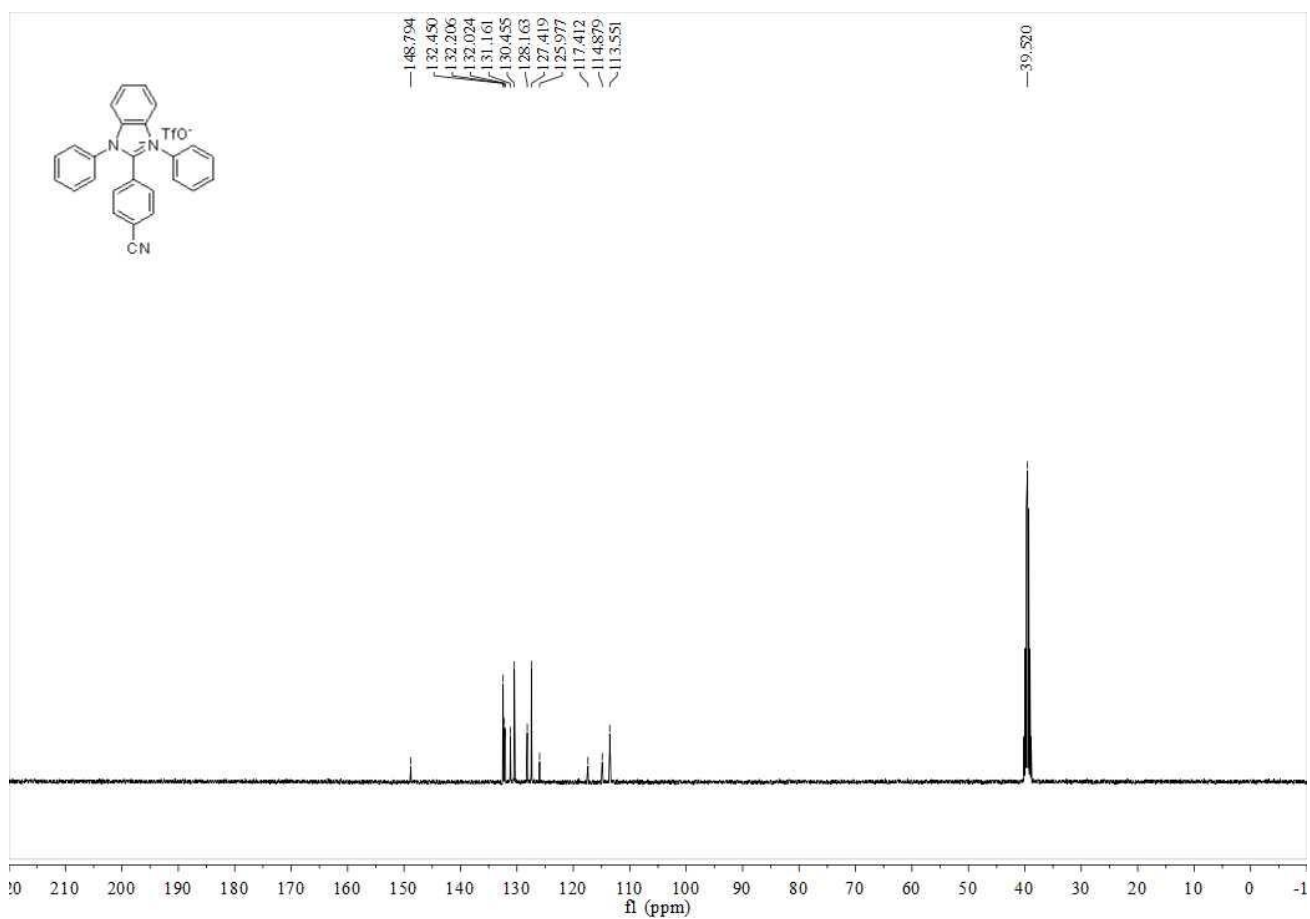

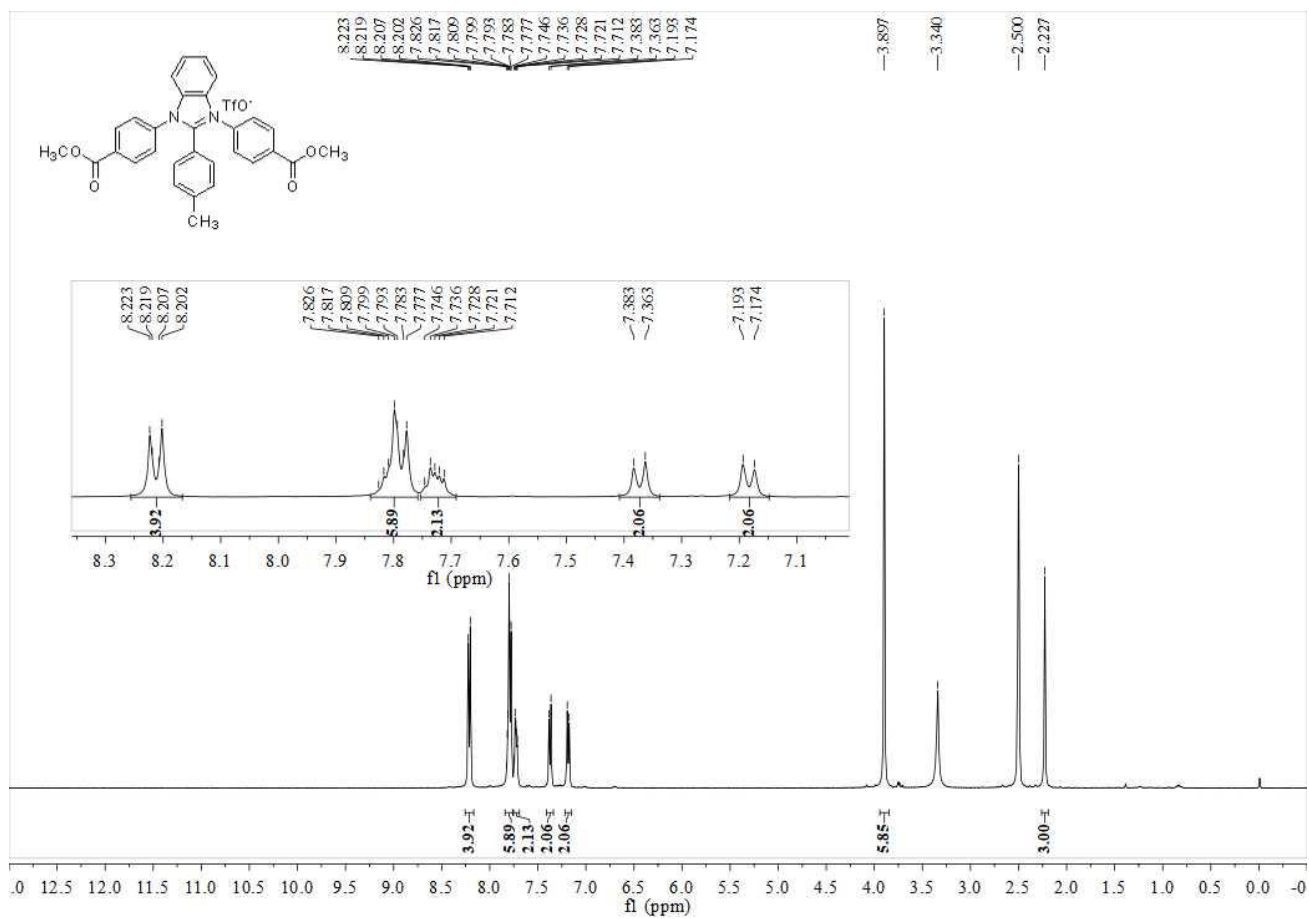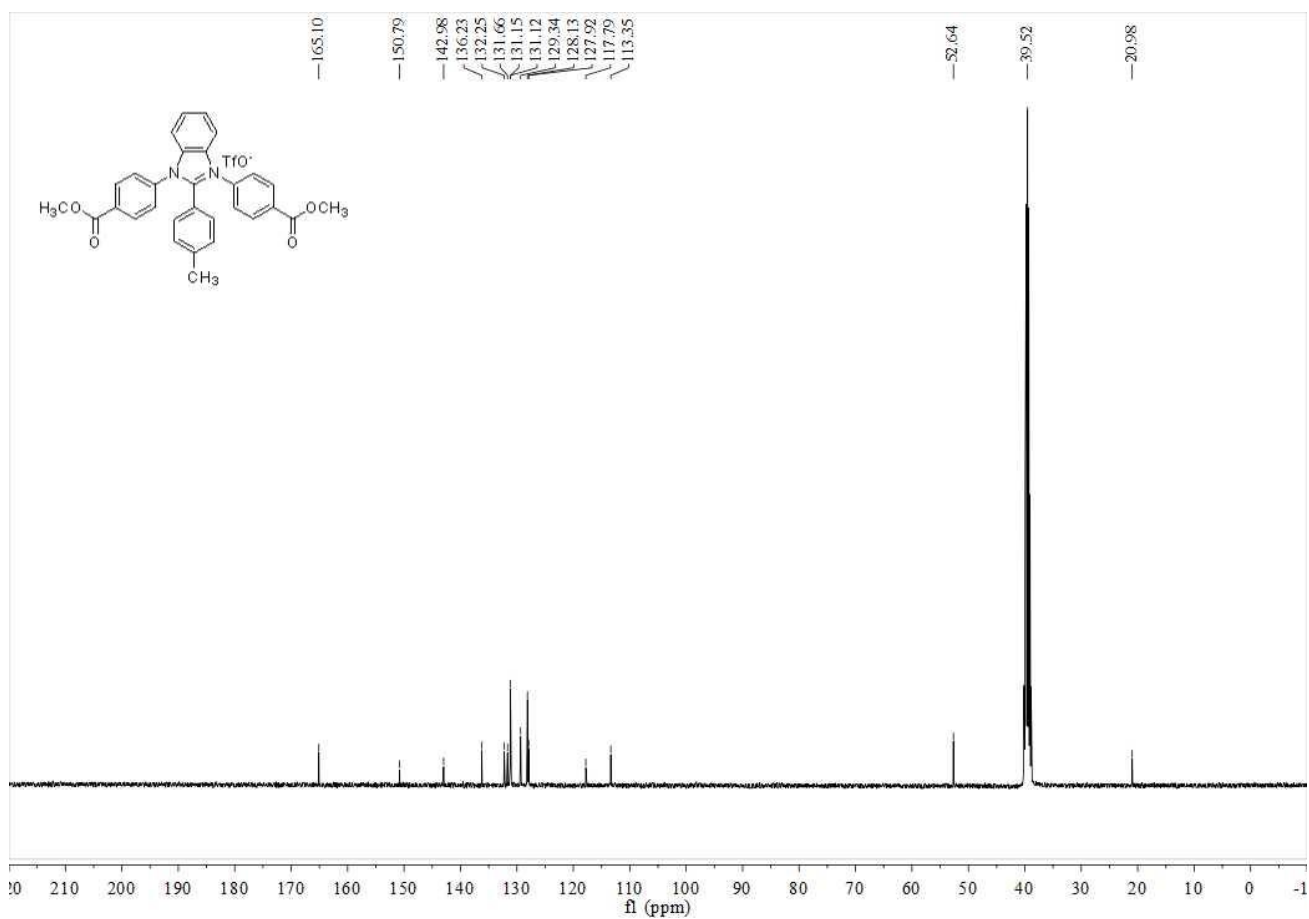

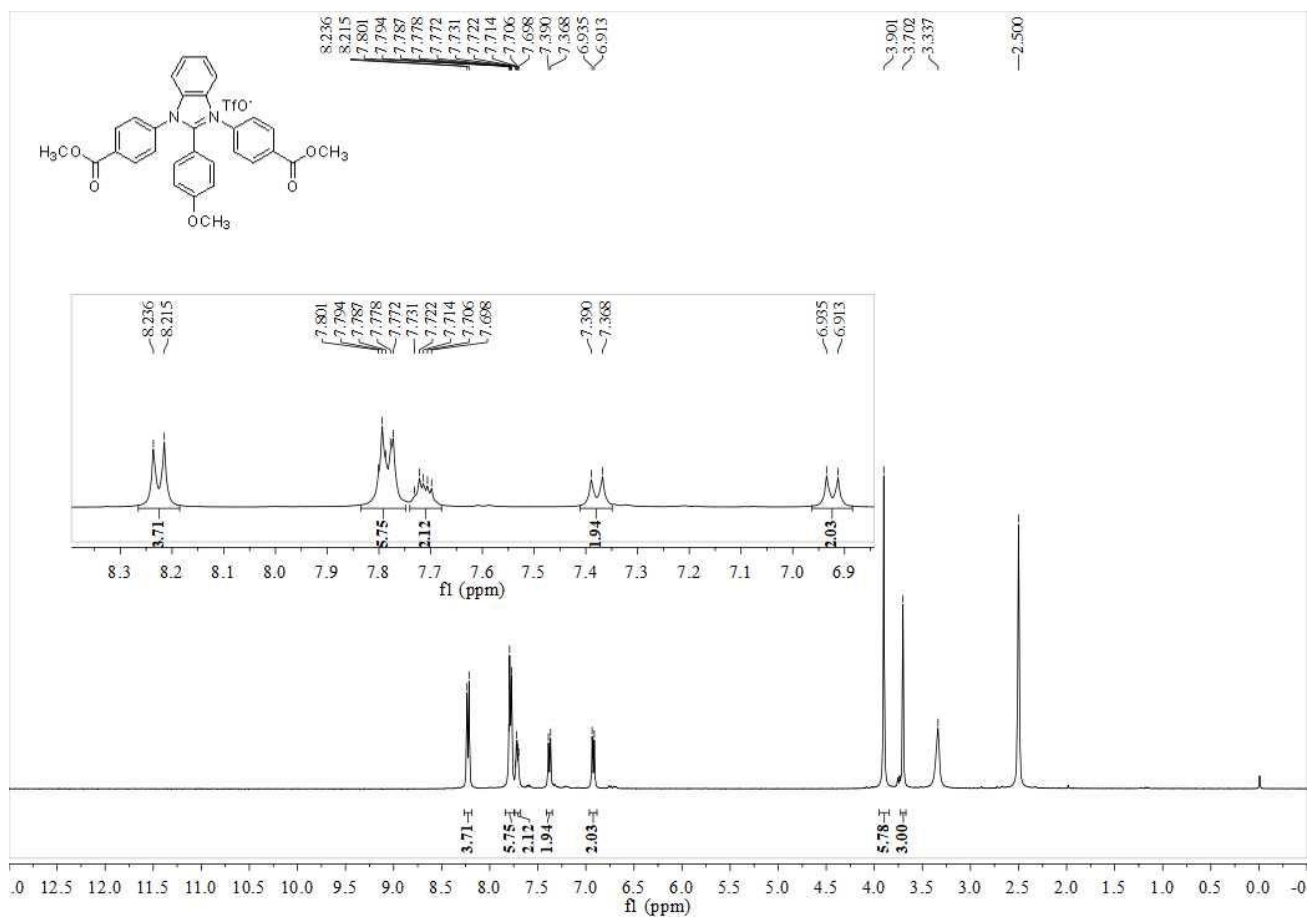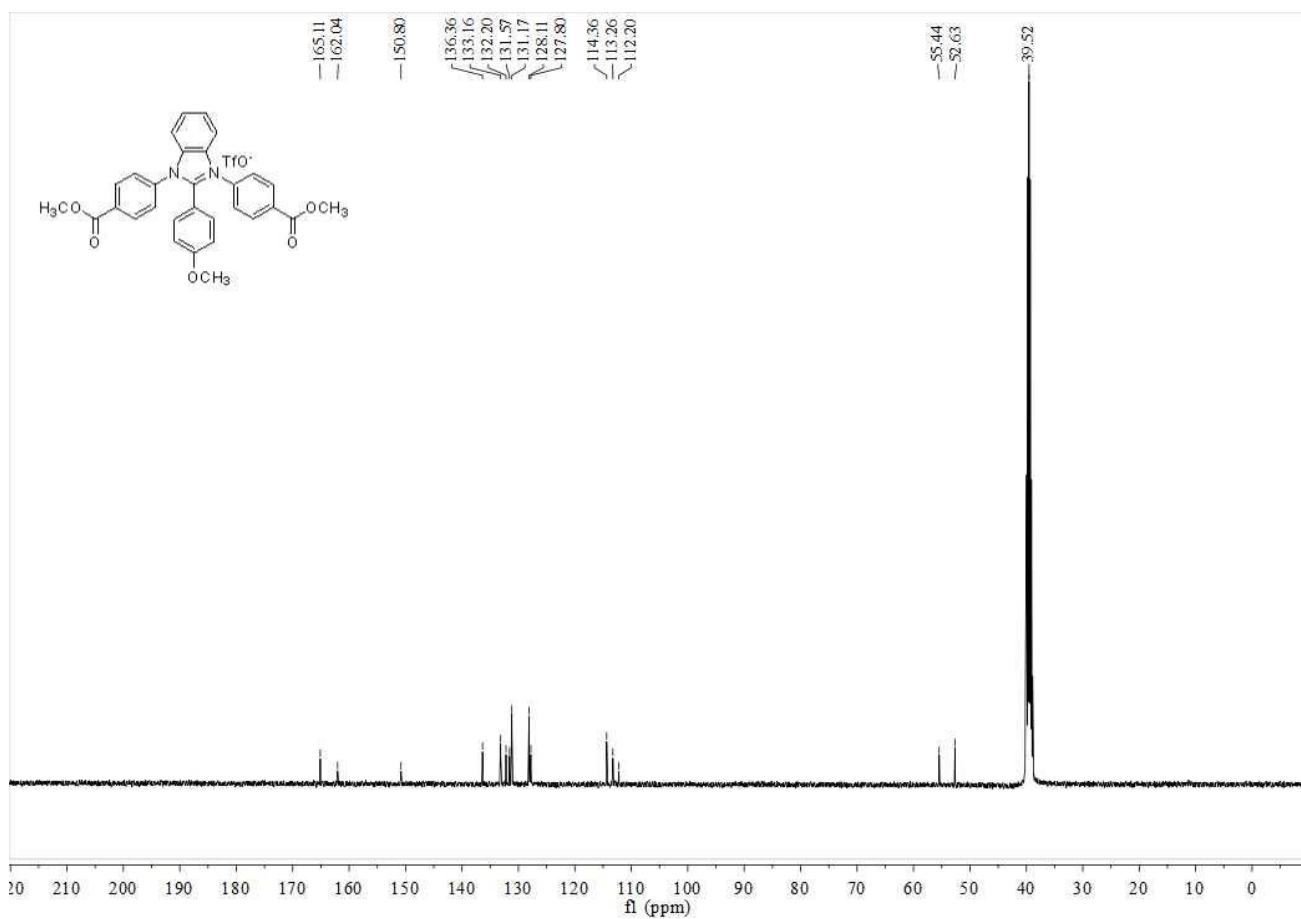

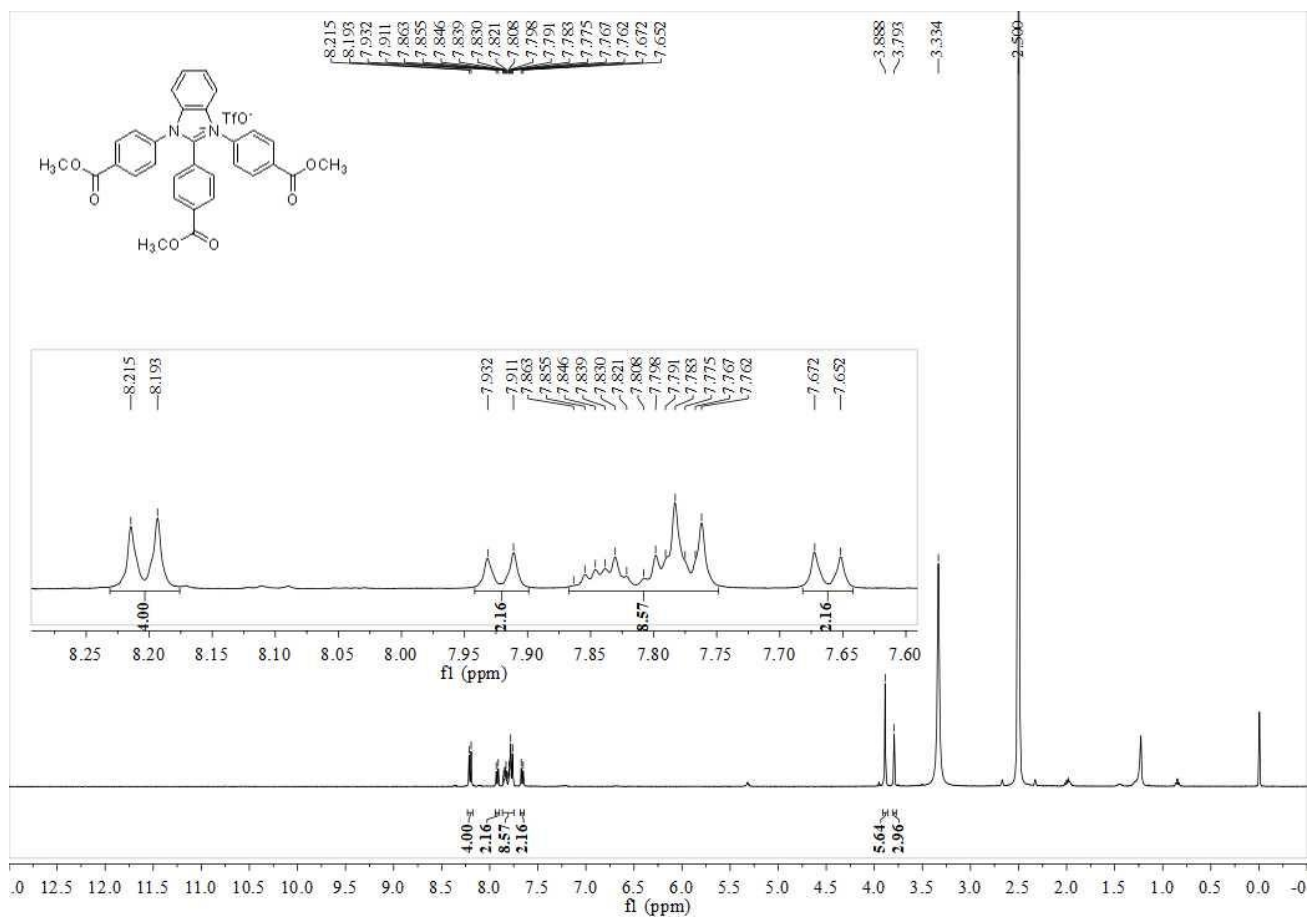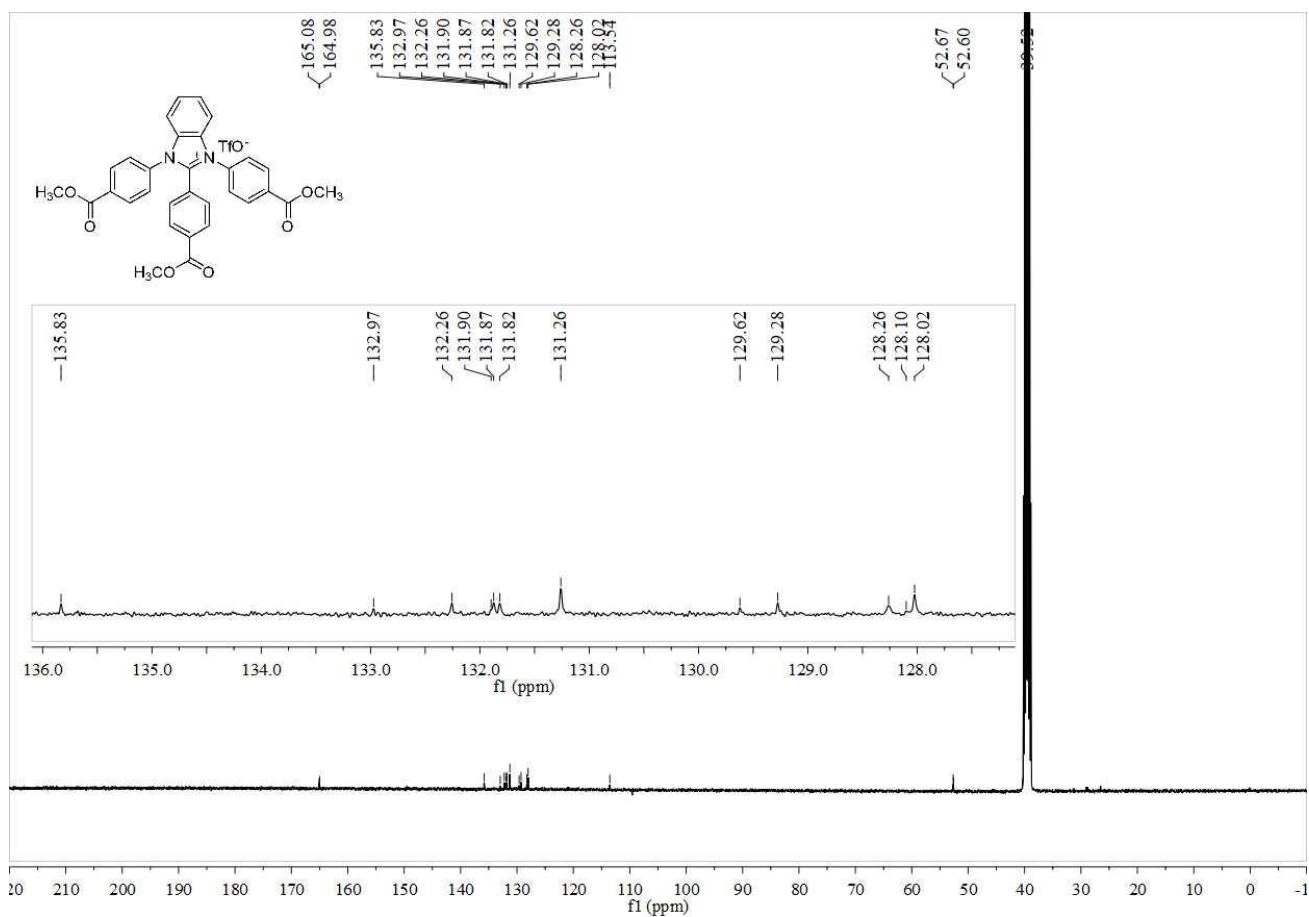

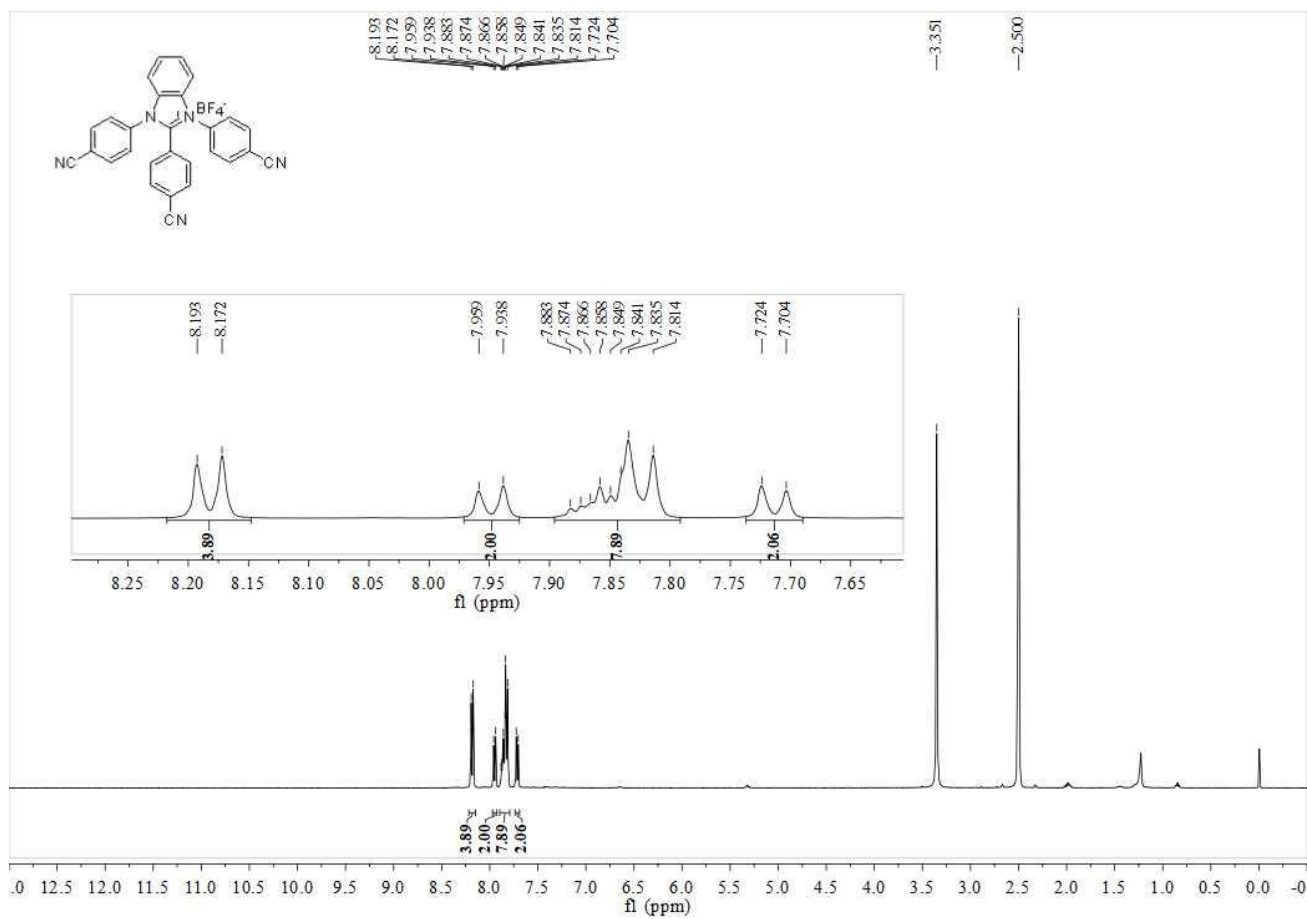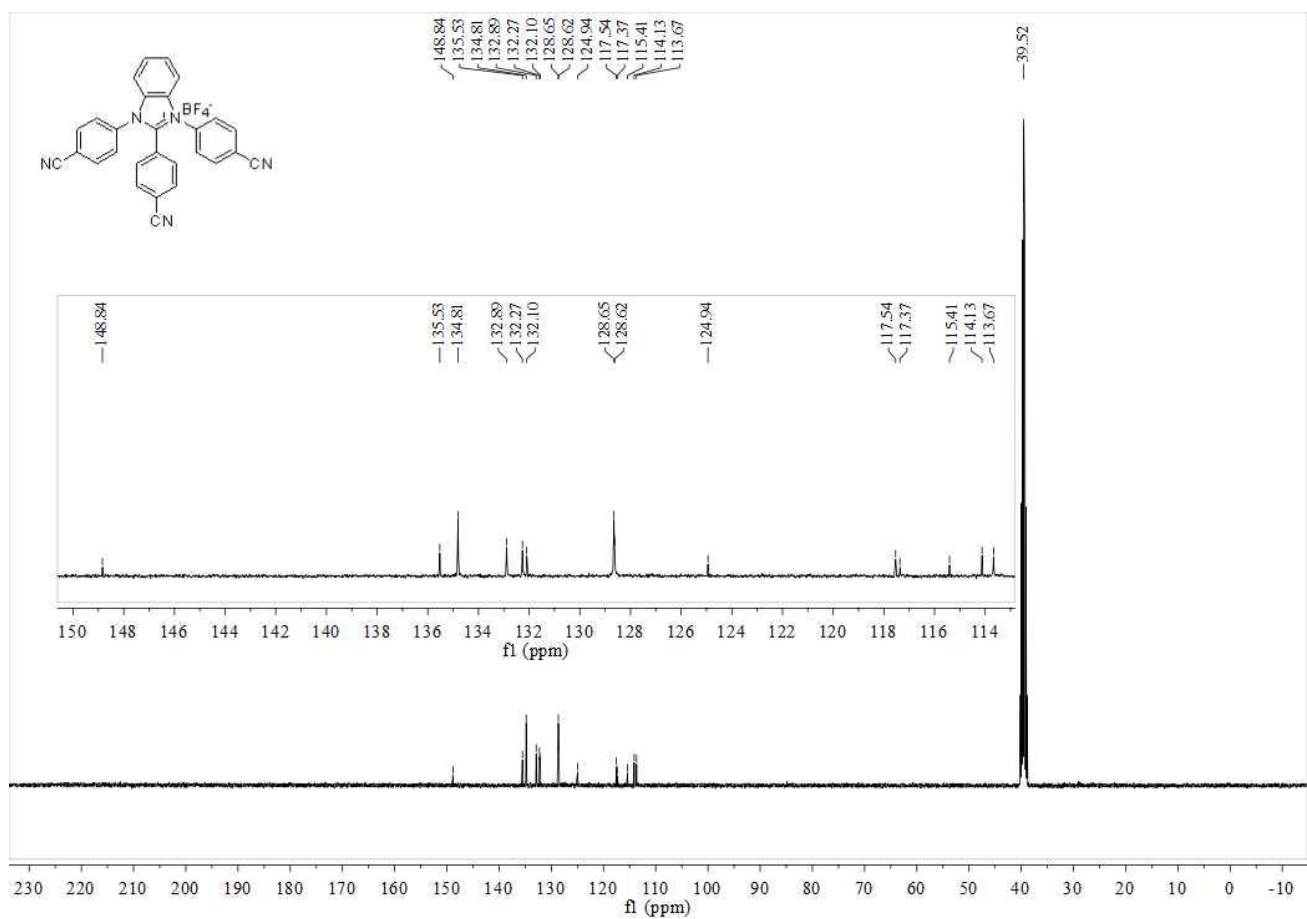



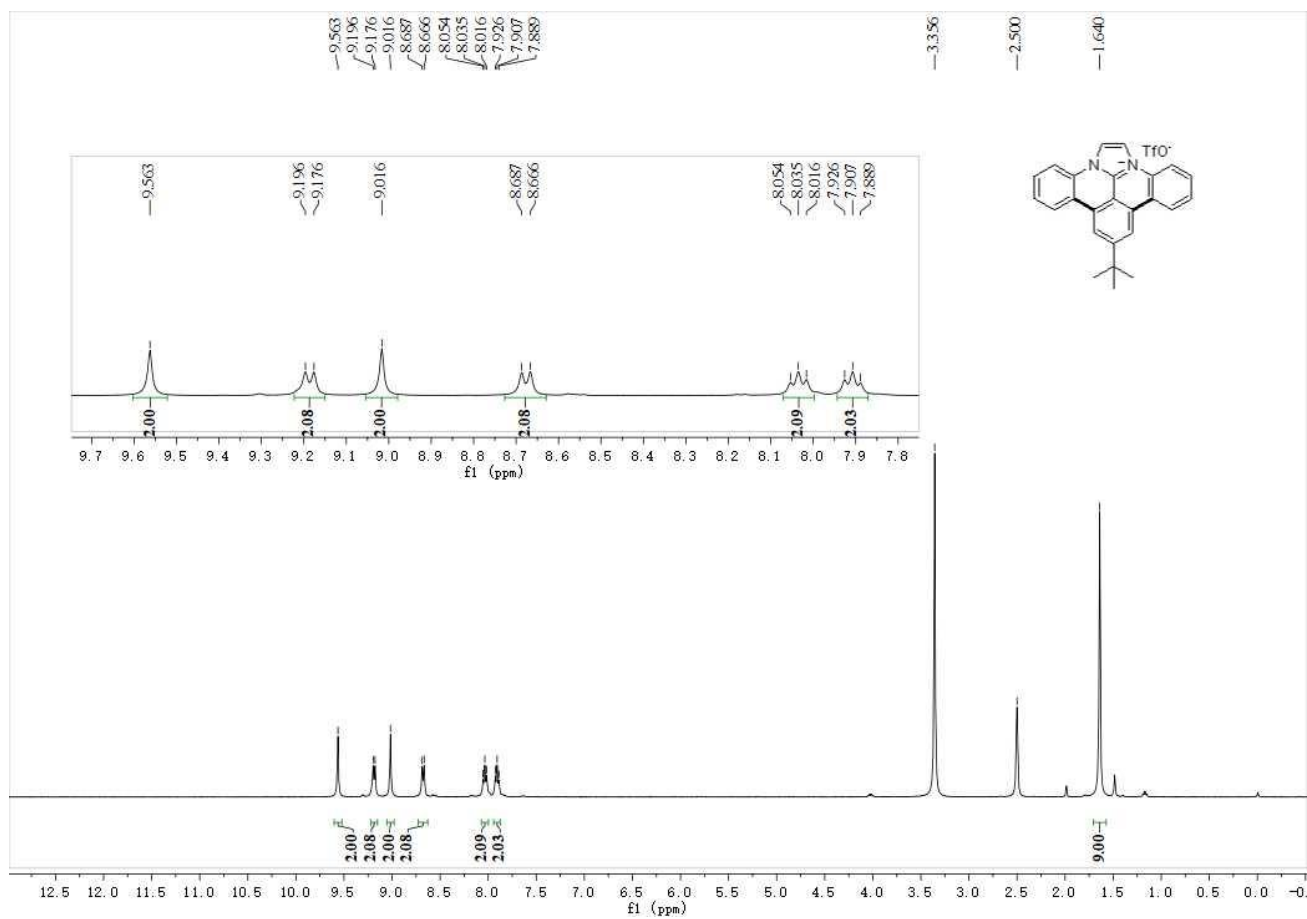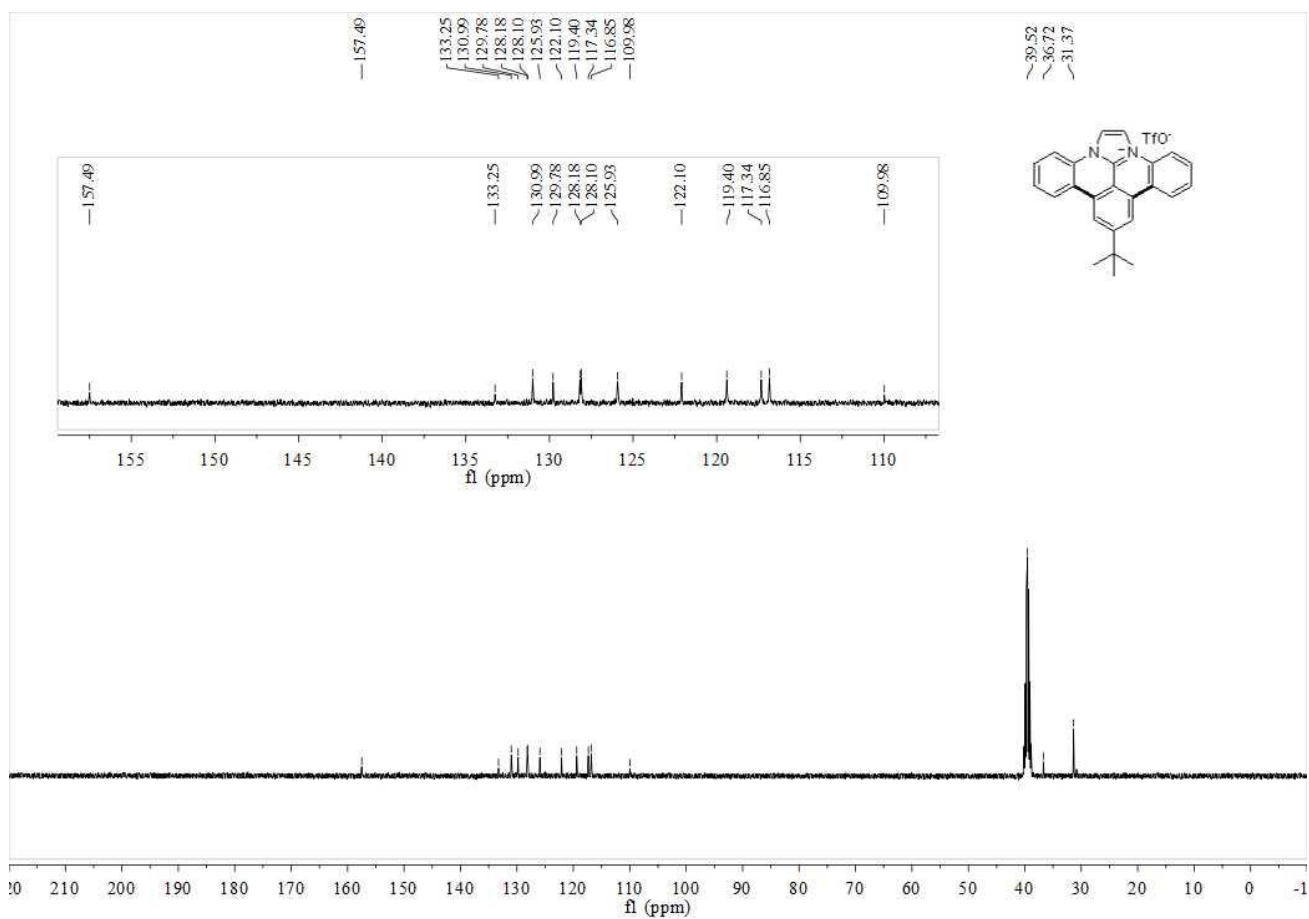

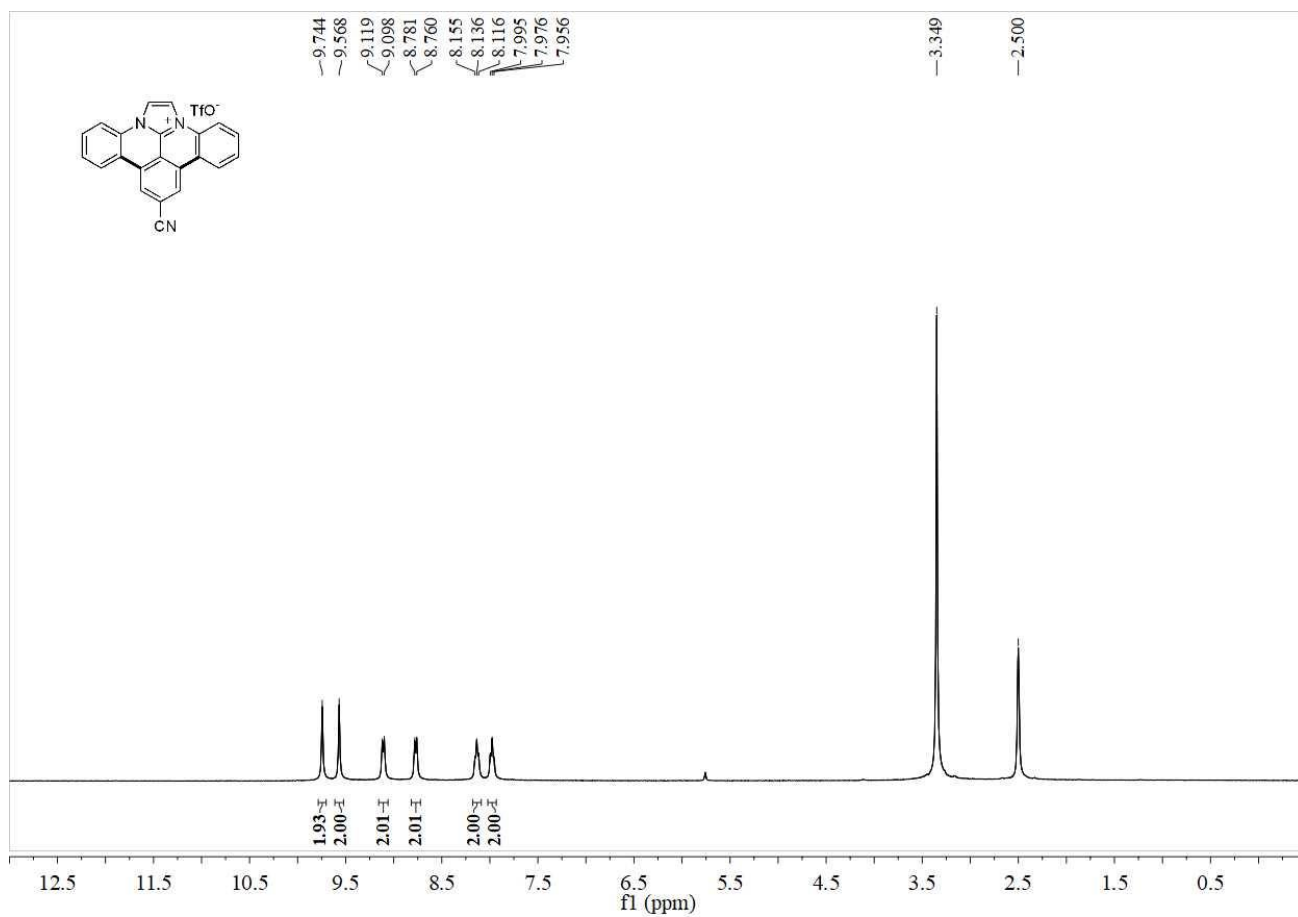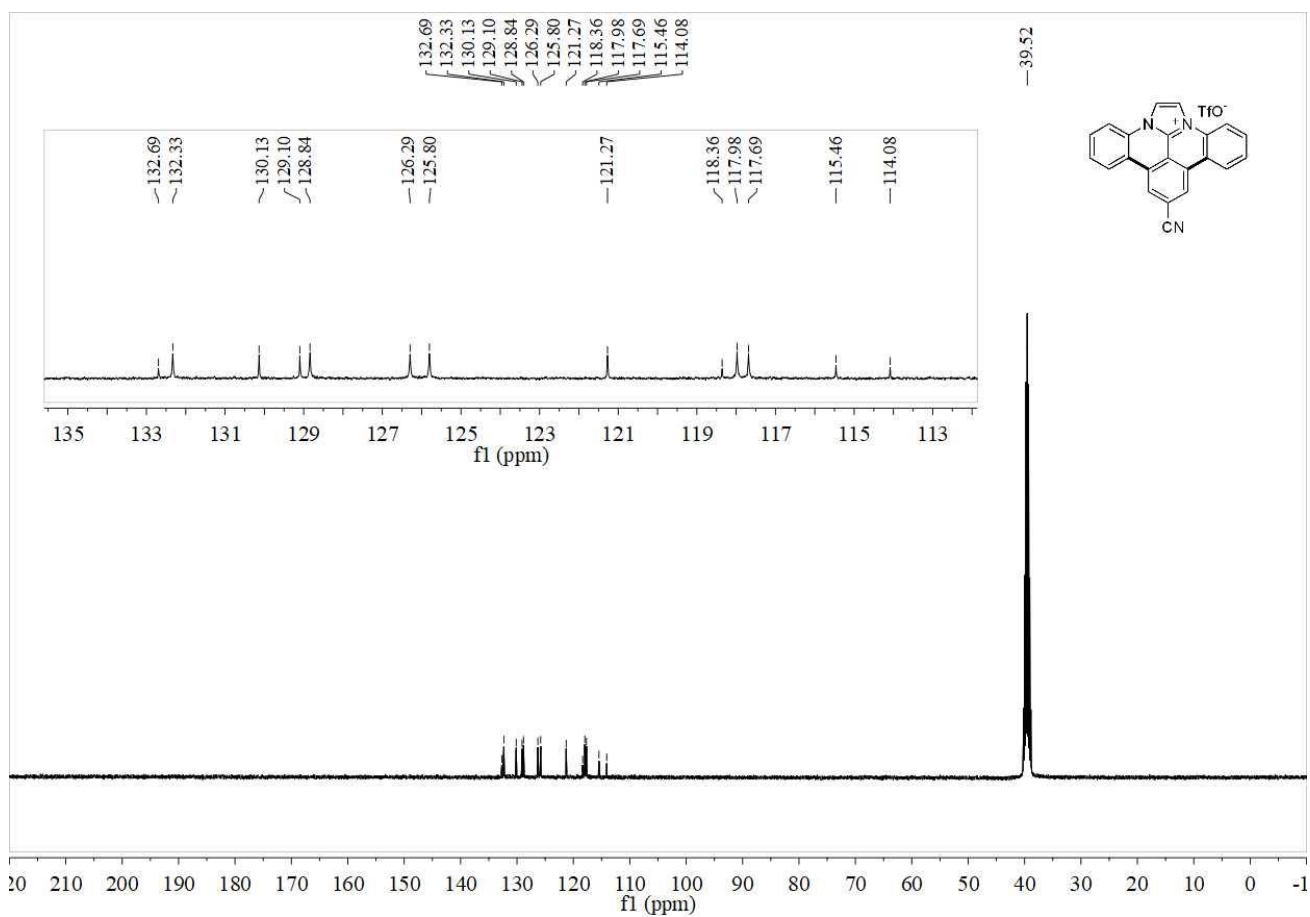

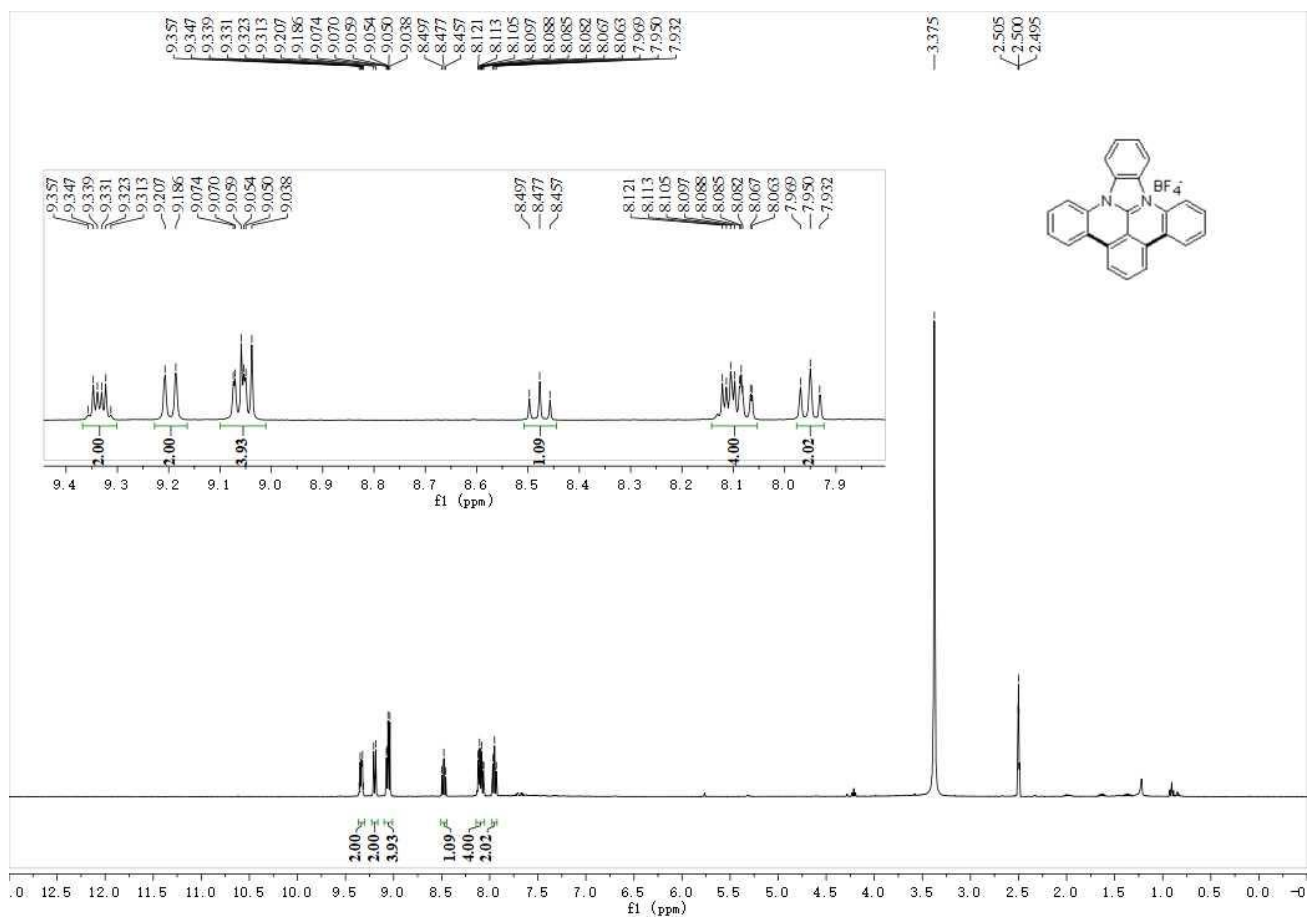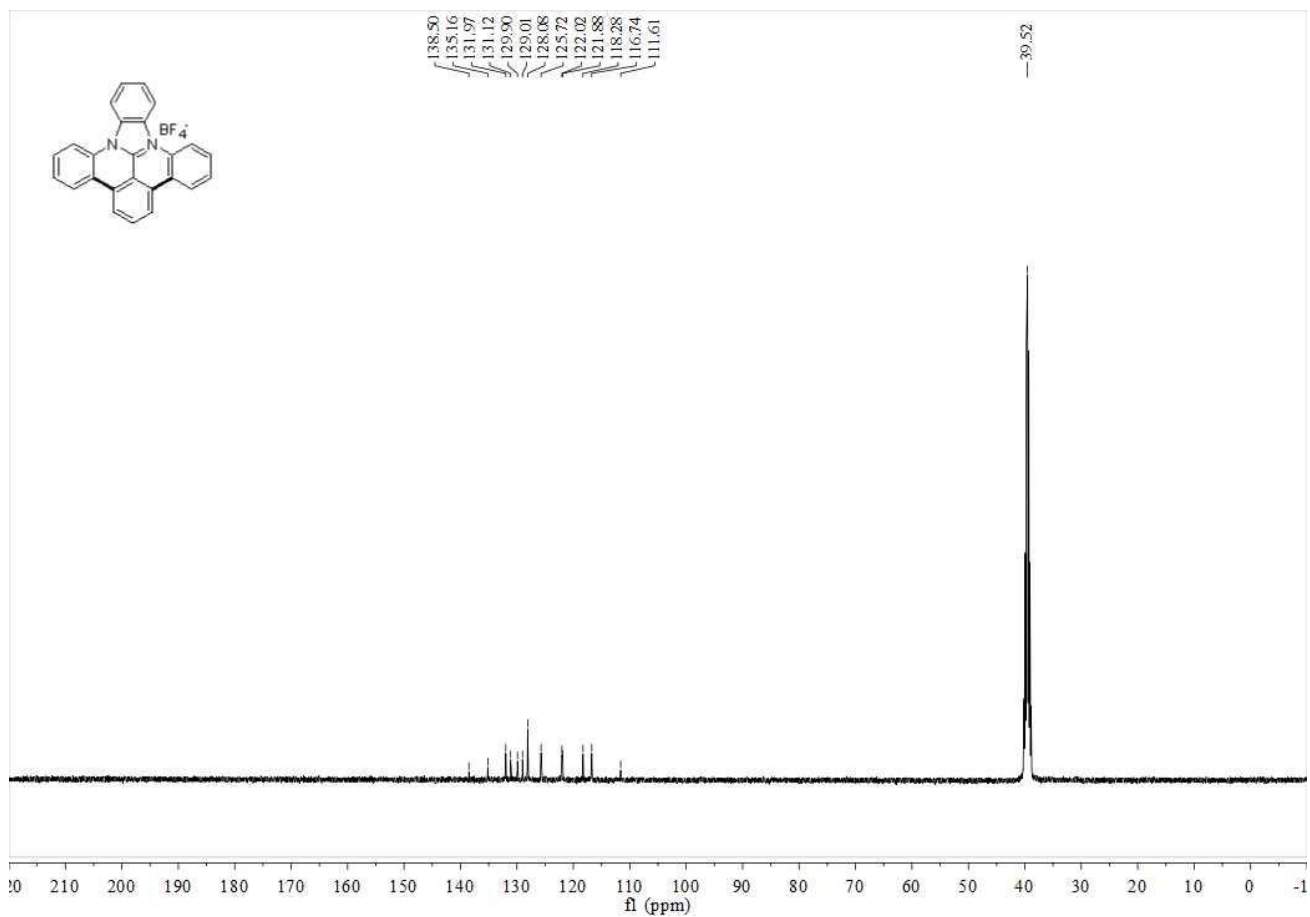

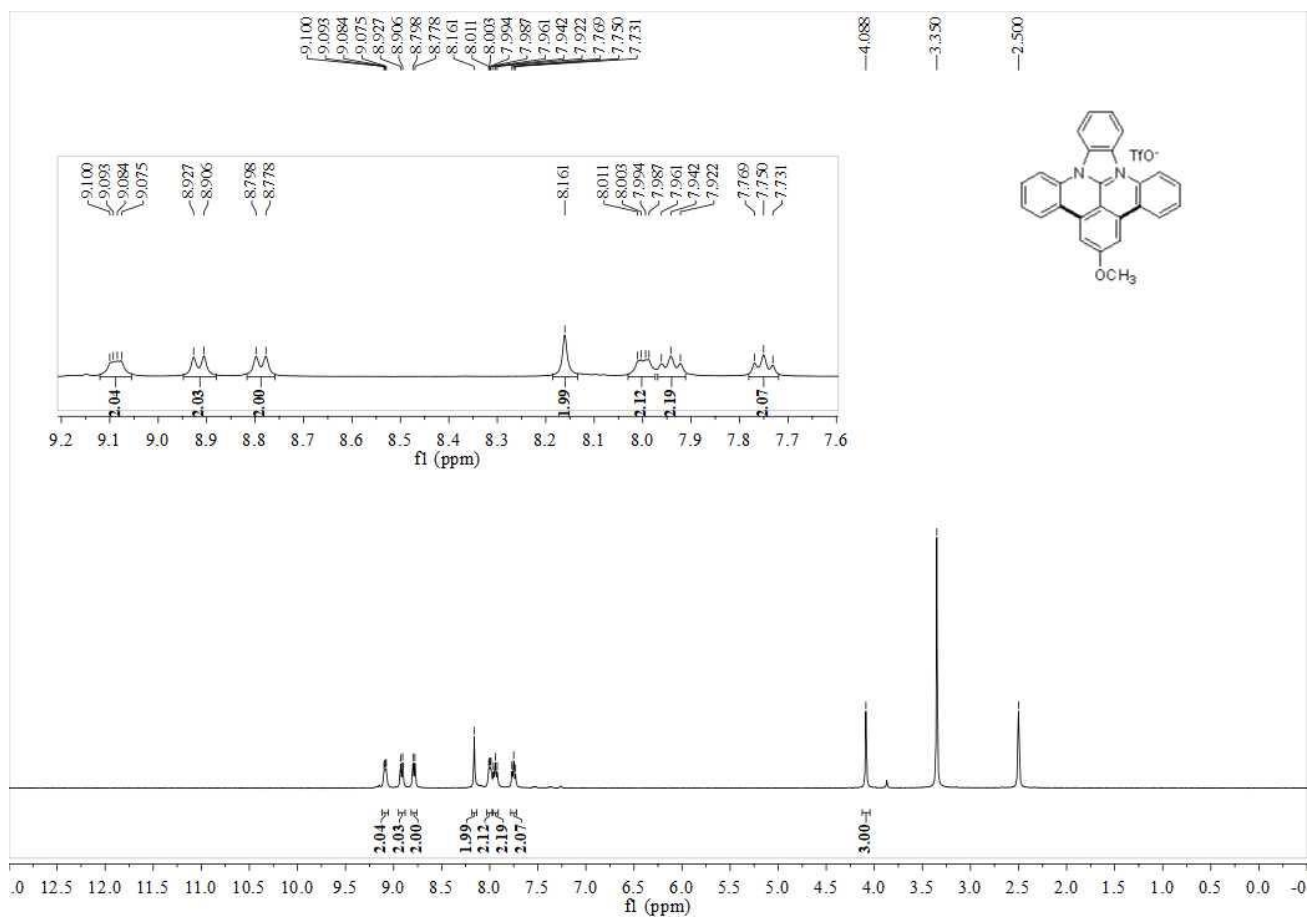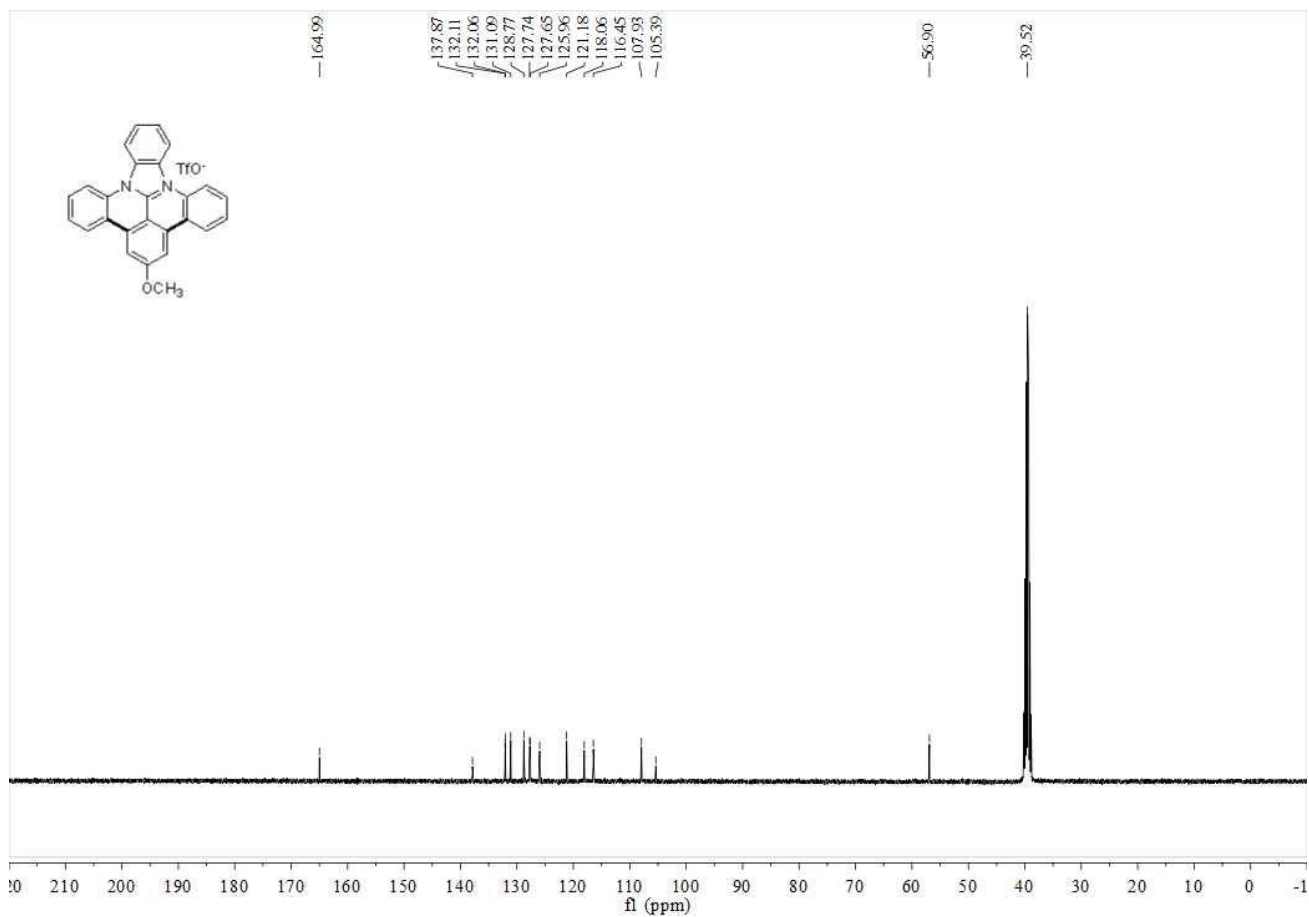

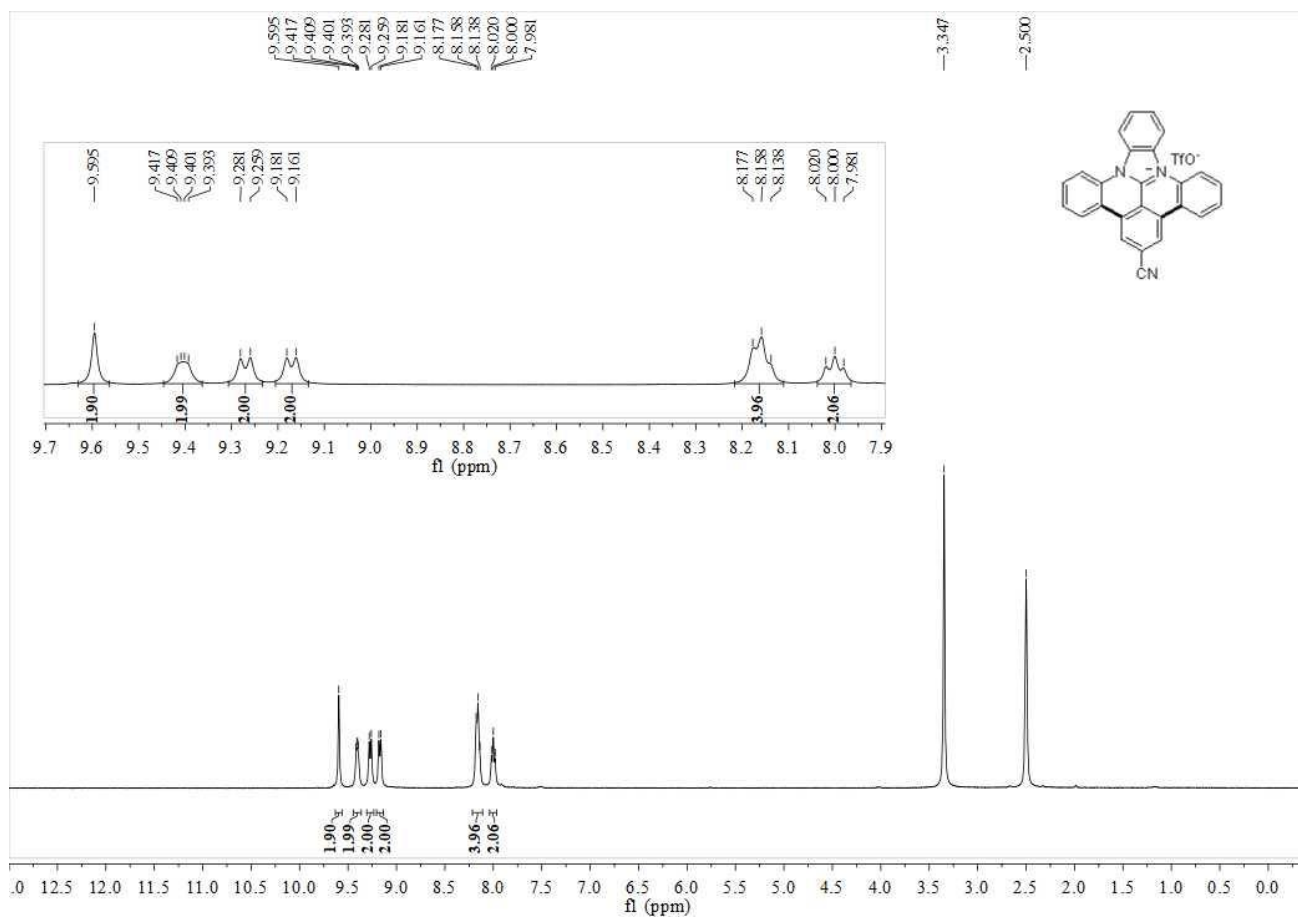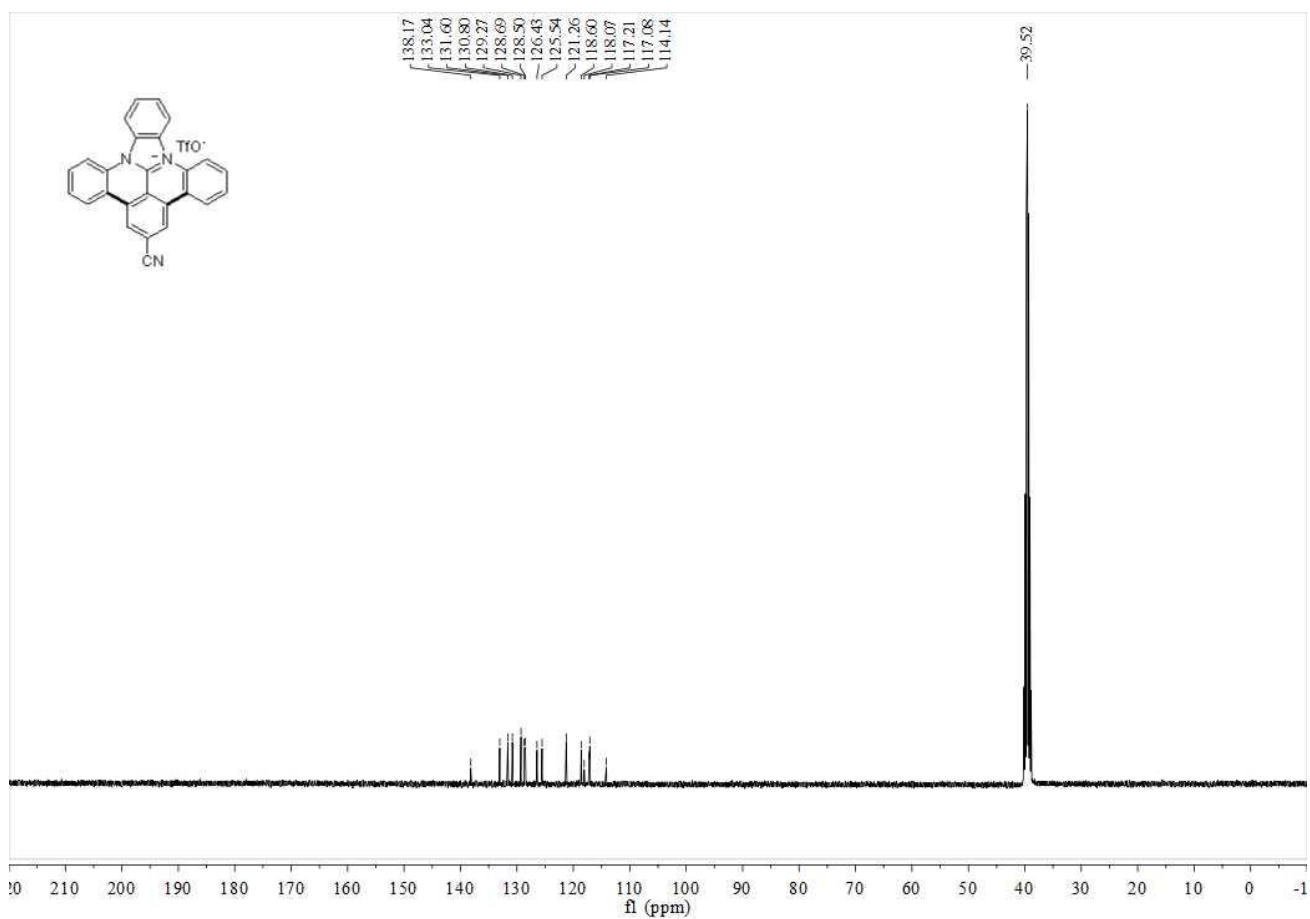

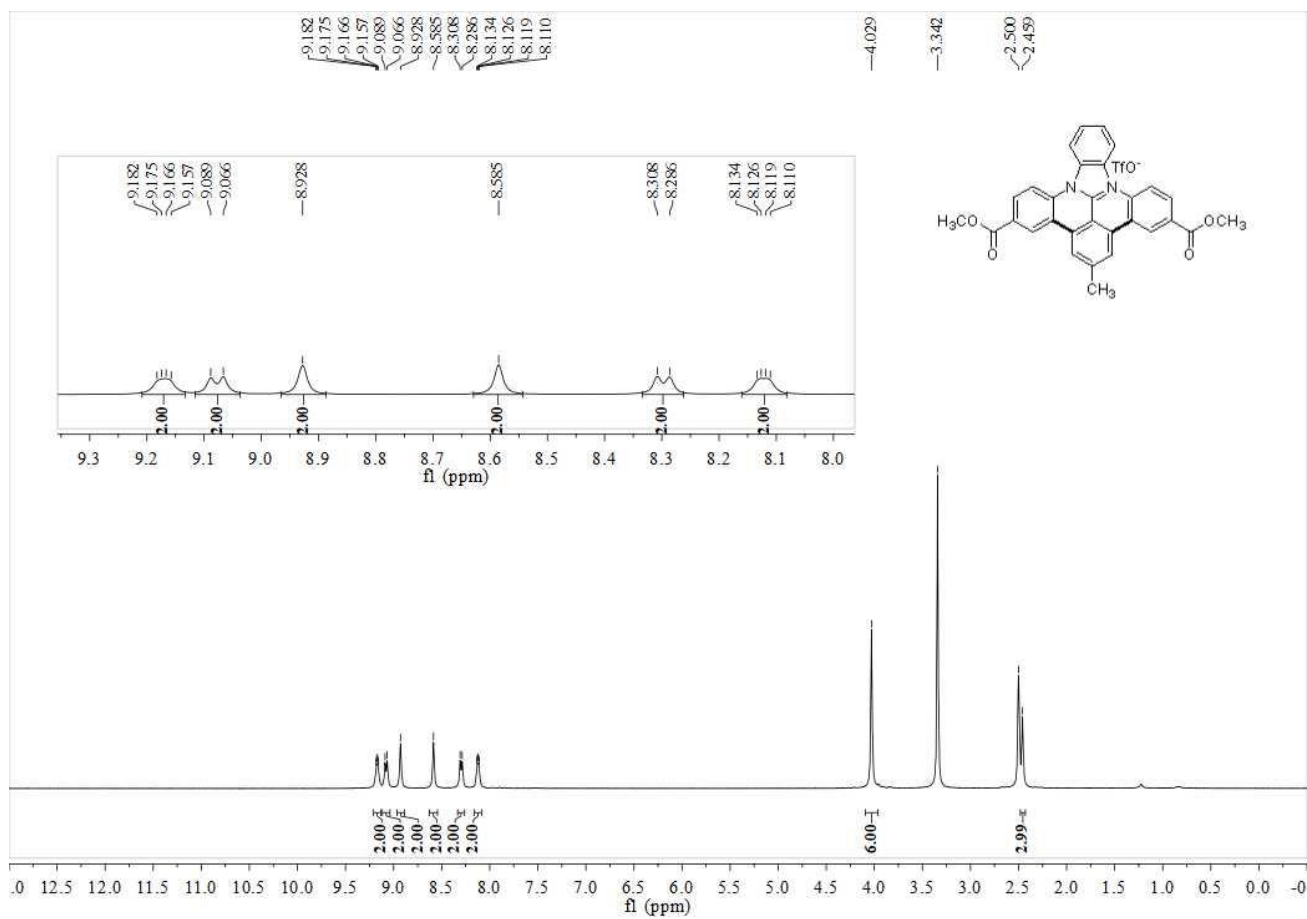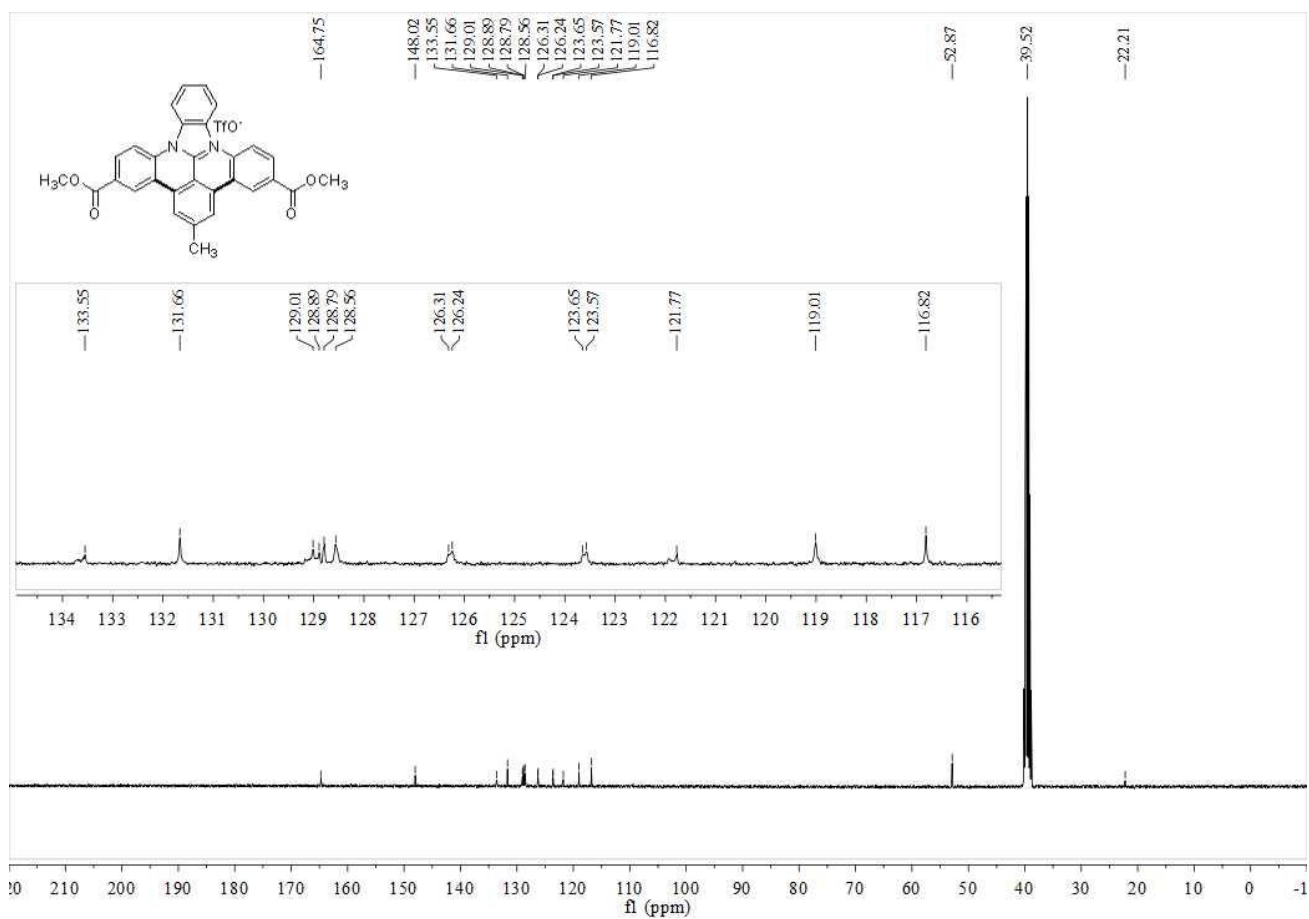

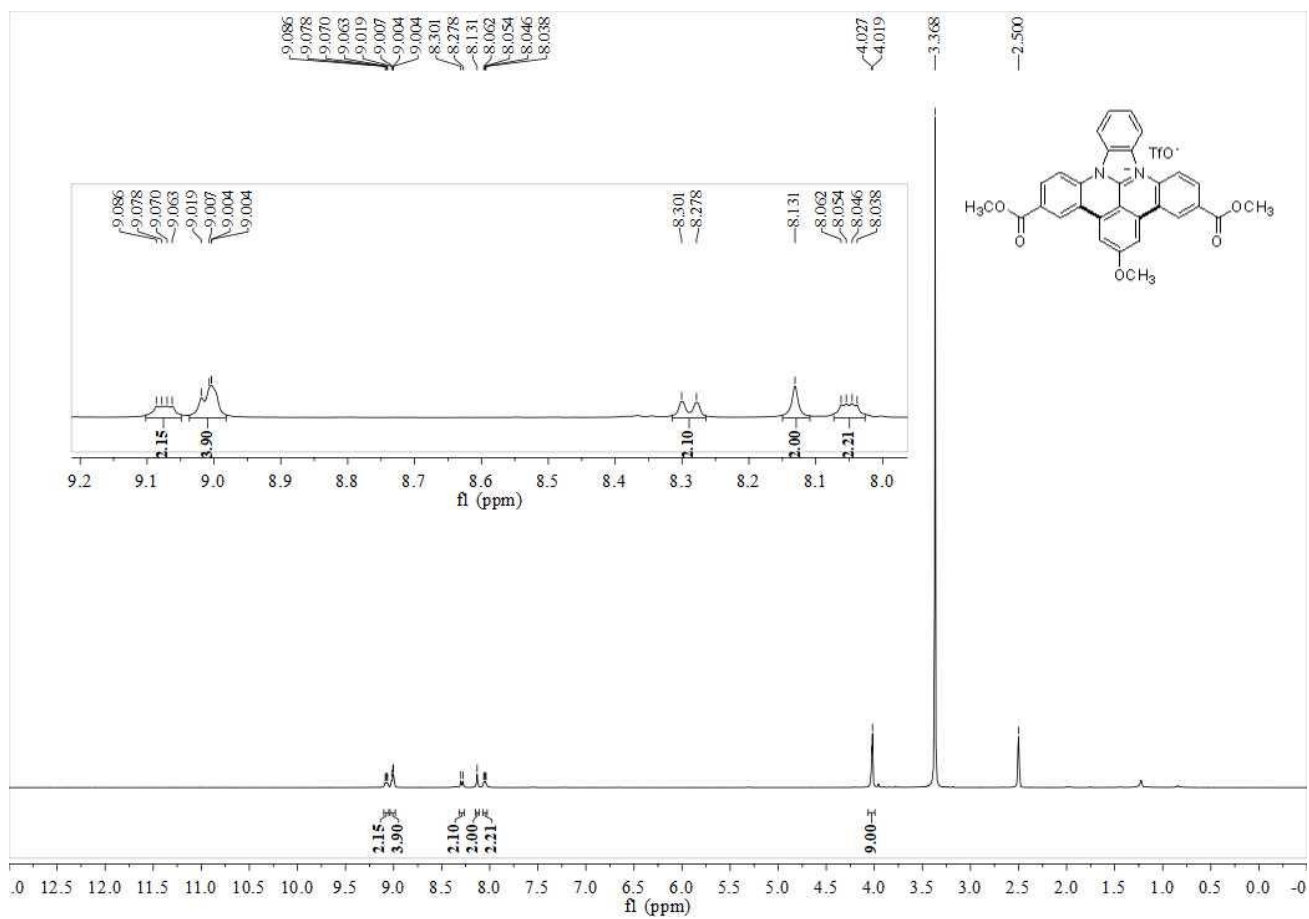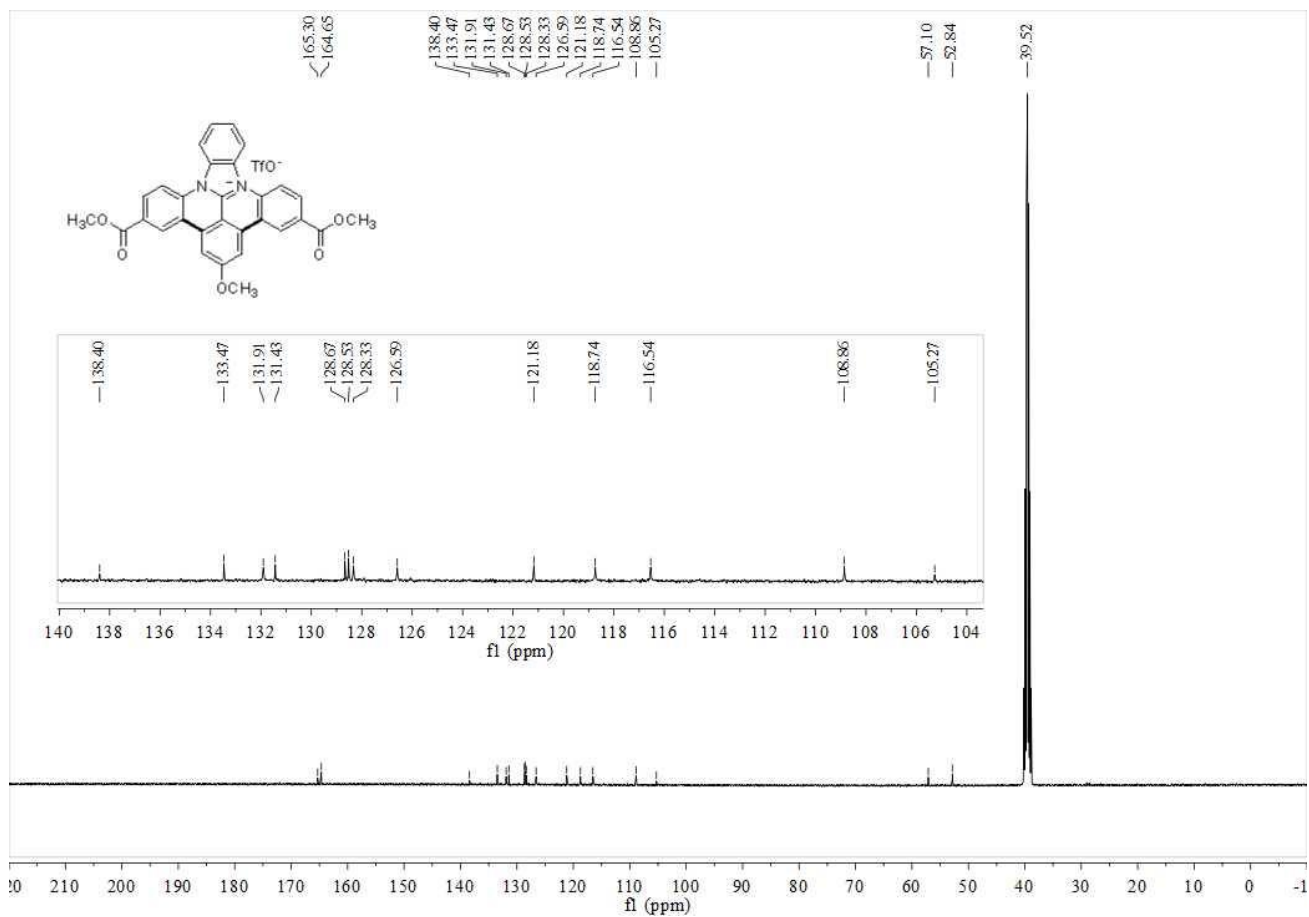

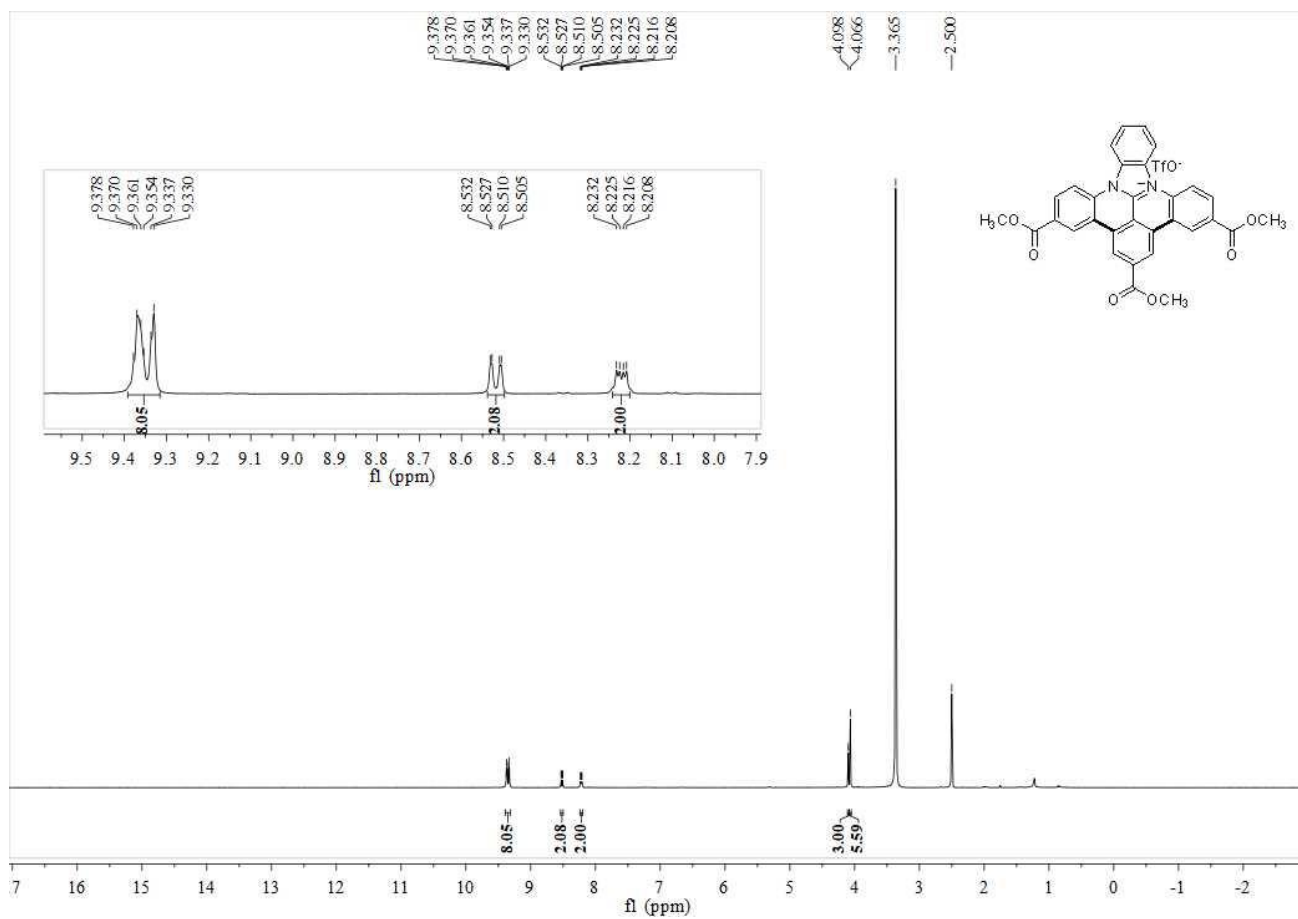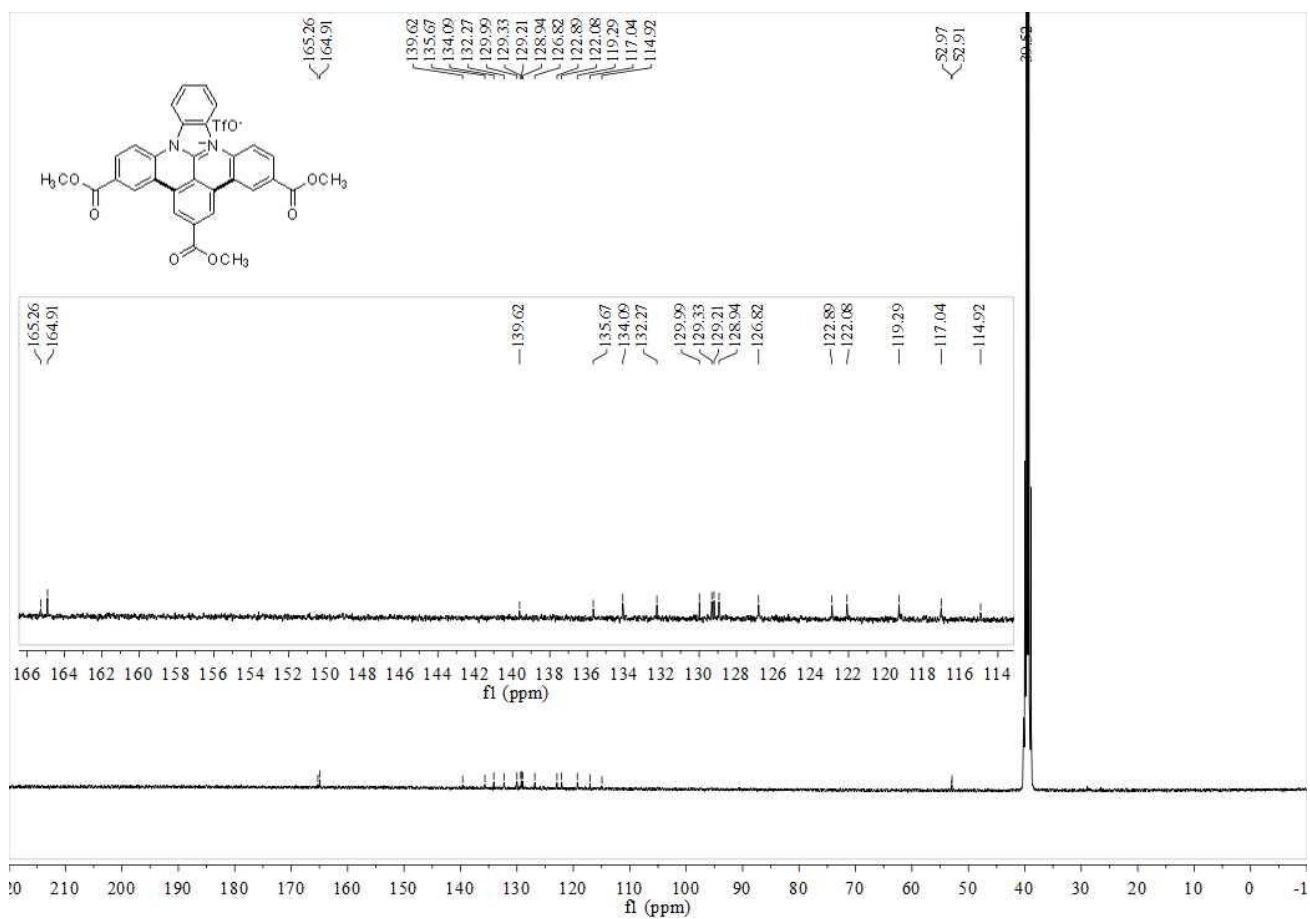



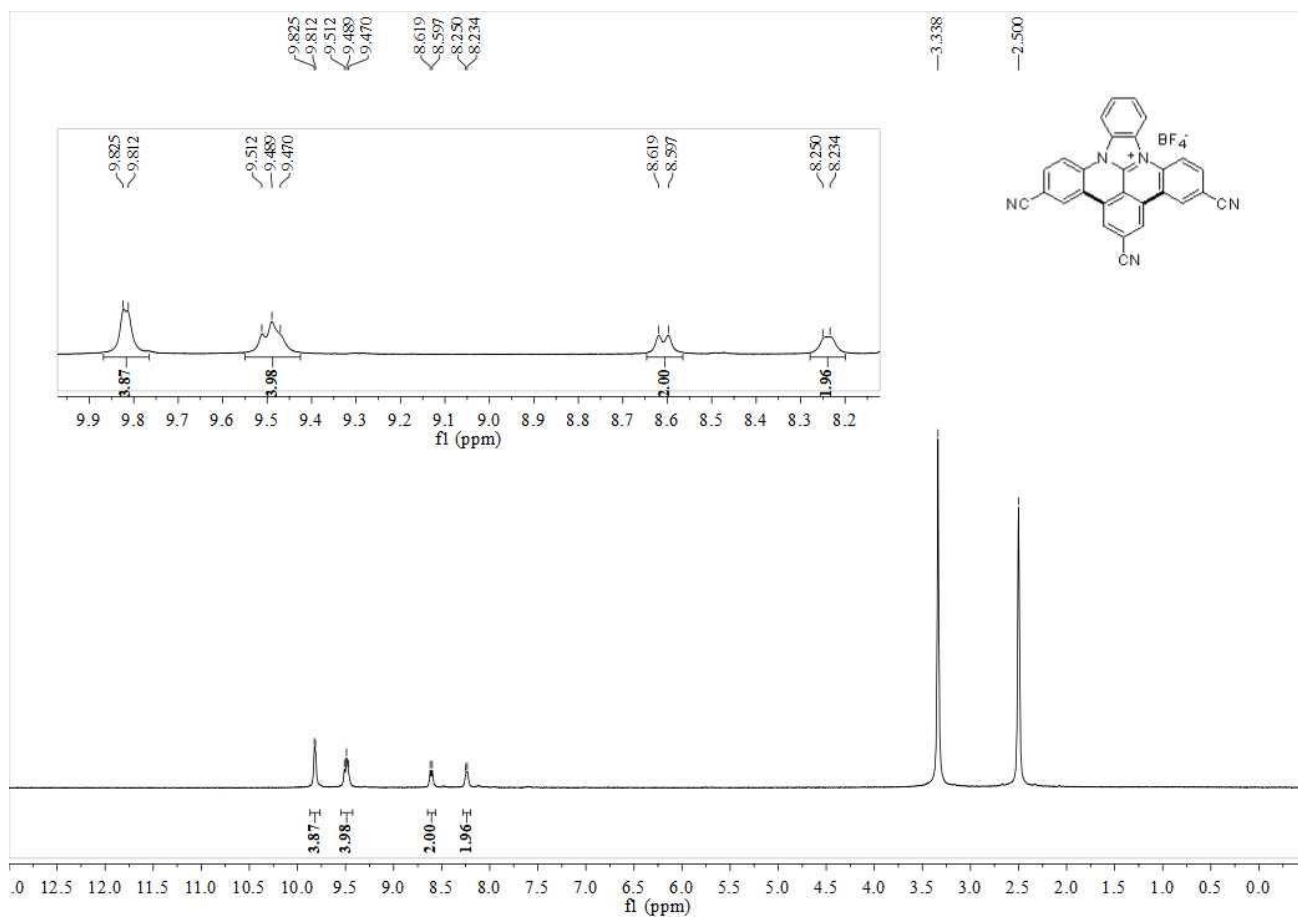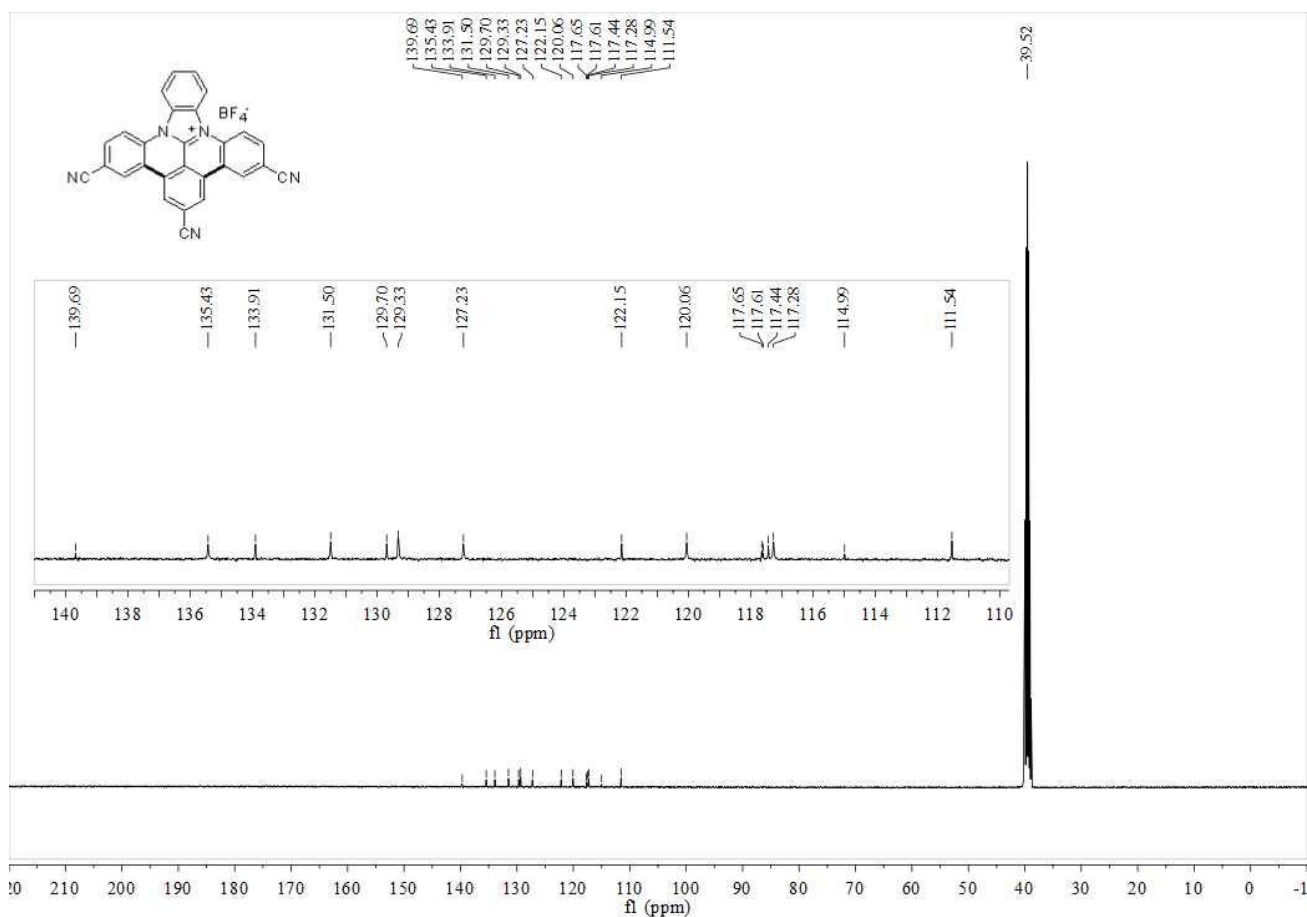

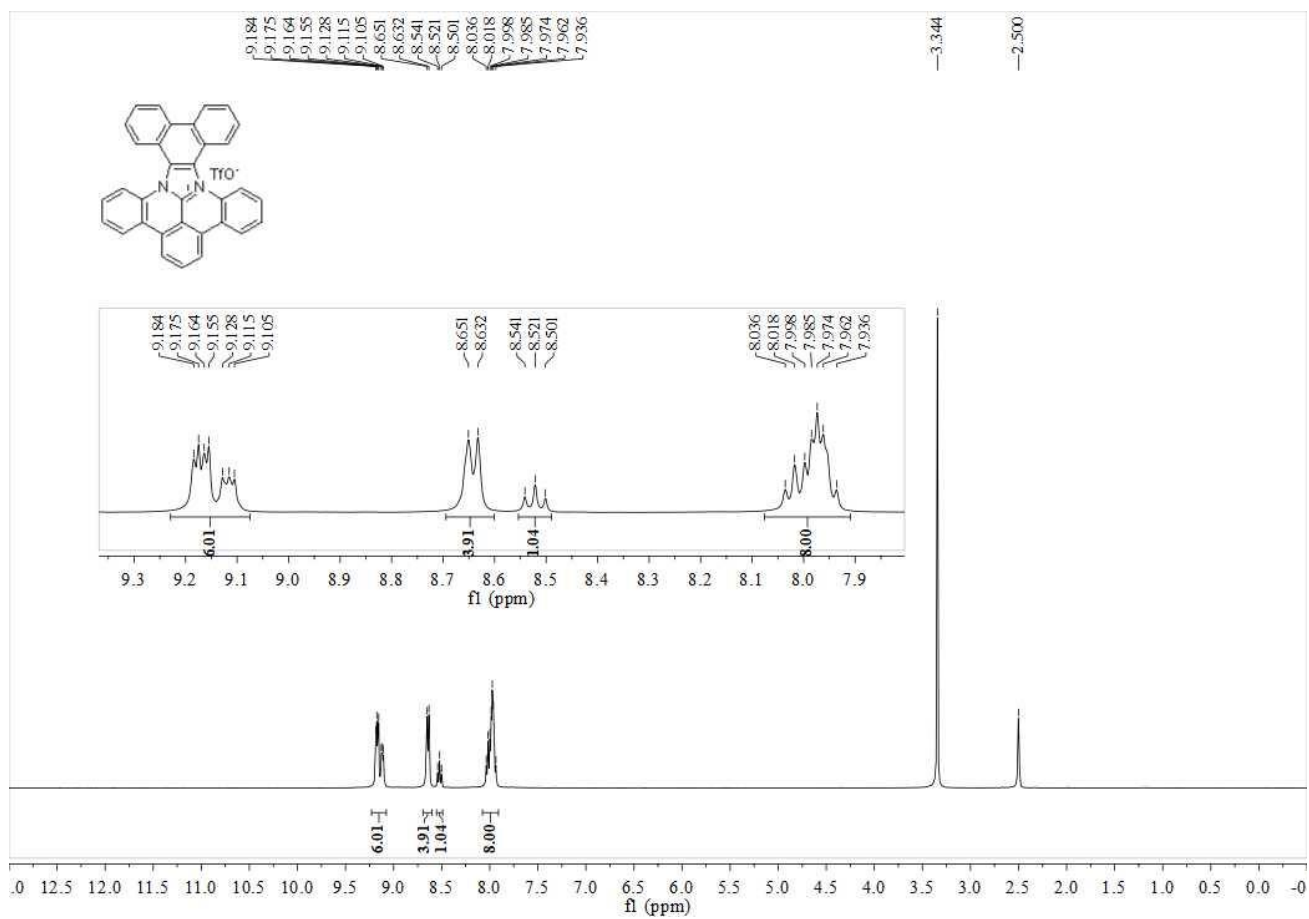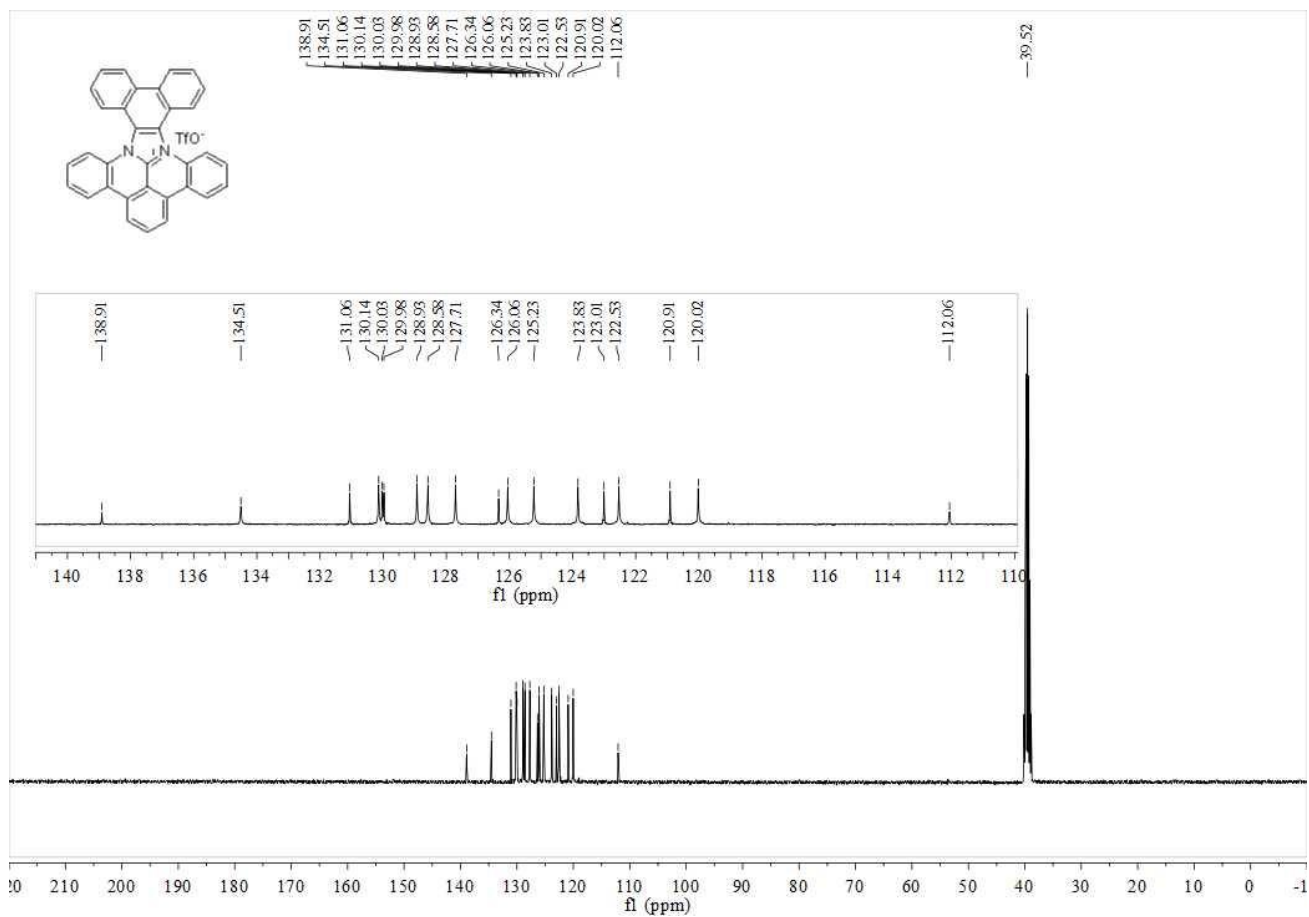

Supplement: d1cc06194a1.pdf [file d1cc06194a1.pdf]
